# Supplementary material for: A plug and play microfluidic platform for standardized sensitive low-input chromatin immunoprecipitation
Source: HighWire-hosted journal article supplement (doi:10.1101/gr.260745.120), 2021-03-11
Supplement: Supplemental_Table_S1.xlsx [file Supplemental_Table_S1.xlsx]

## Sheet: H3K4me3-peaks-statistics
Table S1 : Peaks as present in 2i and/or serum mESCs, together with statisitcal analysis for calling differential peaks (DE-Seq2, FDR-adjusted p-value (padj) <0.05). Differential peaks for the three hPTMs are also present in separate tabs.
Dirks et al.: A plug and play microfluidic platform for standardized sensitive low-input Chromatin Immunoprecipitation; Genome Research 2021
Peak nr	chr:start-end	baseMean	log2FoldChange	lfcSE	stat	pvalue	padj	H3K4me3_2i_rep1_X13	H3K4me3_2i_rep2_X14	H3K4me3_FCS_rep1_X49	H3K4me3_FCS_rep2_X30	H3K4me3_FCS_rep3_X56
1	Chr1:4561304-4562293	38.416	0.19199	0.339035	0.566284	0.571201	0.764775	31.092	40.1557	38.0398	43.3321	39.4605
2	Chr1:4774049-4774508	22.6504	0.916734	0.431043	2.12678	0.0334383	0.145708	17.7668	8.03114	29.2092	33.2213	25.0237
3	Chr1:4774675-4775463	51.7268	0.521214	0.317657	1.64081	0.100838	0.289008	48.8588	29.4475	56.3805	62.8316	61.1156
4	Chr1:4775788-4776447	44.0405	0.326965	0.326917	1.00014	0.317241	0.556703	44.4171	29.4475	49.5876	47.6653	49.085
5	Chr1:4797312-4797933	34.7711	-0.0133342	0.35304	-0.0377697	0.969871	0.985021	41.456	26.7705	38.7191	38.9989	27.9111
6	Chr1:4797701-4798321	43.5803	-0.660908	0.311555	-2.12132	0.0338951	0.147043	54.7811	58.8951	38.0398	33.9435	32.2421
7	Chr1:4798116-4799166	68.6398	0.711168	0.293261	2.42503	0.0153071	0.087449	48.8588	48.1869	77.4382	90.2752	78.4398
8	Chr1:4847039-4847764	39.1168	0.565577	0.353533	1.59979	0.109646	0.304412	29.6114	29.4475	56.3805	41.1655	38.9793
9	Chr1:4847902-4849110	74.4928	-0.145172	0.26813	-0.541422	0.588217	0.775519	82.9119	74.9573	74.0418	69.3314	71.2214
10	Chr1:5009350-5009829	17.0073	-0.0505072	0.4422	-0.114218	0.909065	0.957901	25.1697	8.03114	17.6613	14.444	19.7302
11	Chr1:5073083-5073551	26.0117	-0.832041	0.376148	-2.212	0.0269664	0.126594	44.4171	26.7705	24.4542	18.055	16.3617
12	Chr1:5073484-5074173	38.2176	0.280277	0.356121	0.787028	0.431266	0.658034	42.9365	21.4164	47.5498	46.9431	32.2421
13	Chr1:5578460-5578939	7.7384	1.08733	0.578456	1.87971	0.0601476	0.212269	5.92228	0	10.8685	10.833	11.0682
14	Chr1:5907157-5907604	11.4847	0.36394	0.504769	0.721002	0.470908	0.689802	10.364	8.03114	10.8685	16.6106	11.5494
15	Chr1:6203779-6204725	53.206	0.0748024	0.303425	0.246527	0.805275	0.903583	47.3782	56.218	57.739	55.6095	49.085
16	Chr1:6204631-6205177	31.4583	-1.21508	0.345756	-3.51427	0.000440969	0.00631431	54.7811	42.8328	23.0956	17.3328	19.249
17	Chr1:6205195-6205653	26.5338	0.126825	0.386537	0.328104	0.742833	0.869025	19.2474	32.1246	23.7749	31.0547	26.4674
18	Chr1:6348941-6349433	13.4701	0.692611	0.490769	1.41128	0.158163	0.376373	11.8446	5.3541	17.6613	15.1662	17.3241
19	Chr1:6349211-6349723	14.394	0.195447	0.466949	0.418563	0.675535	0.828912	14.8057	10.7082	19.0199	12.9996	14.4368
20	Chr1:7078032-7078456	28.0381	0.437179	0.388398	1.1256	0.260337	0.49963	29.6114	13.3852	31.247	37.5545	28.3923
21	Chr1:7078201-7078863	50.6958	-0.264249	0.316609	-0.834621	0.403931	0.634446	75.5091	34.8016	50.2669	49.1097	43.7915
22	Chr1:7079406-7080299	59.0963	0.9872	0.31633	3.12079	0.00180365	0.0190454	38.4948	32.1246	75.4004	81.6088	67.8528
23	Chr1:7387622-7388177	24.8181	-0.638856	0.378307	-1.68872	0.0912722	0.271906	32.5725	32.1246	23.7749	15.8884	19.7302
24	Chr1:8931873-8932324	5.51602	0.310706	0.594552	0.522588	0.601261	0.784521	5.92228	2.67705	8.15139	3.61101	7.21838
25	Chr1:9289206-9289869	20.4539	0.391838	0.428852	0.91369	0.36088	0.595786	23.6891	8.03114	22.4163	20.2217	27.9111
26	Chr1:9289619-9289951	9.44625	0.921008	0.550758	1.67225	0.0944741	0.277954	8.88342	0	10.1892	13.7218	14.4368
27	Chr1:9289735-9290120	9.22406	0.457573	0.538027	0.850465	0.395066	0.626495	10.364	2.67705	13.5857	7.94422	11.5494
28	Chr1:9591596-9592068	5.40926	1.56951	0.625106	2.51079	0.0120461	0.0739828	1.48057	0	6.79283	10.1108	8.66206
29	Chr1:9689179-9689946	34.9153	1.02302	0.382721	2.67301	0.00751748	0.053687	19.2474	21.4164	48.2291	50.5541	35.1295
30	Chr1:9689994-9690501	30.8198	-1.20922	0.344363	-3.51148	0.000445624	0.00636858	50.3394	45.5098	19.0199	19.4995	19.7302
31	Chr1:9737559-9738086	27.6738	0.25467	0.38758	0.657077	0.511131	0.719906	16.2863	34.8016	31.9263	27.4437	27.9111
32	Chr1:9737925-9738624	42.3144	-0.819119	0.326919	-2.50558	0.0122252	0.0746364	45.8977	72.2803	38.0398	25.9993	29.3548
33	Chr1:9838309-9839262	34.8215	0.684225	0.37879	1.80634	0.0708646	0.234177	31.092	16.0623	32.6056	54.8873	39.4605
34	Chr1:9898601-9899106	13.5286	-0.142966	0.474924	-0.301029	0.763392	0.880077	8.88342	21.4164	10.8685	14.444	12.0306
35	Chr1:9932206-9932780	27.4391	0.739899	0.395237	1.87204	0.0612012	0.214384	20.728	16.0623	29.8884	33.9435	36.5731
36	Chr1:9932749-9933363	41.901	-0.103394	0.328271	-0.314965	0.752788	0.874804	39.9754	48.1869	41.4362	46.2209	33.6858
37	Chr1:9958005-9958647	26.3303	0.13384	0.38635	0.346421	0.729026	0.862157	25.1697	24.0934	21.737	33.2213	27.4299
38	Chr1:9999198-9999808	17.3272	0.462553	0.450442	1.02689	0.304474	0.544838	11.8446	16.0623	19.0199	16.6106	23.0988
39	Chr1:10027216-10027712	24.2004	0.819542	0.41528	1.97347	0.0484421	0.185659	19.2474	10.7082	33.2849	28.8881	28.8735
40	Chr1:10027594-10028128	39.1013	-0.0830836	0.333594	-0.249056	0.803317	0.902668	47.3782	32.1246	42.1155	39.7211	34.167
41	Chr1:10029724-10030296	33.9447	-1.60248	0.348583	-4.59712	4.28e-06	0.000141051	53.3005	64.2492	23.7749	12.9996	15.3992
42	Chr1:10222587-10223103	22.6127	-1.69355	0.395699	-4.2799	1.87e-05	0.000492778	38.4948	42.8328	8.15139	8.66642	14.918
43	Chr1:10222866-10223747	45.4926	-0.745489	0.31304	-2.38145	0.0172447	0.094676	48.8588	74.9573	31.9263	36.1101	35.6107
44	Chr1:10983459-10983991	20.3015	-0.870108	0.40342	-2.15683	0.0310192	0.138968	23.6891	34.8016	16.3028	12.2774	14.4368
45	Chr1:10983726-10984339	22.6499	-0.0208745	0.407188	-0.0512649	0.959114	0.981137	17.7668	29.4475	17.6613	20.9439	27.4299
46	Chr1:11403576-11404343	30.0251	0.388103	0.374423	1.03654	0.299952	0.54127	29.6114	18.7393	38.7191	30.3325	32.7233
47	Chr1:11404123-11404449	16.8232	-0.264254	0.439547	-0.601196	0.54771	0.748343	19.2474	18.7393	20.3785	10.833	14.918
48	Chr1:11404233-11404779	28.7518	-0.17898	0.377735	-0.473824	0.635626	0.806088	19.2474	45.5098	25.8127	26.7215	26.4674
49	Chr1:12682998-12683531	20.1457	1.04147	0.451328	2.30756	0.0210234	0.107604	13.3251	8.03114	23.7749	31.0547	24.5425
50	Chr1:12708340-12708838	23.6193	0.0645462	0.398784	0.161858	0.871418	0.939762	22.2085	24.0934	21.737	20.2217	29.836
51	Chr1:12708591-12709448	43.791	0.763502	0.340562	2.24189	0.0249688	0.120548	28.1308	32.1246	48.2291	58.4984	51.9724
52	Chr1:12798268-12798739	13.4276	0.777364	0.506732	1.53407	0.125012	0.328471	2.96114	16.0623	15.6235	16.6106	15.8804
53	Chr1:12854976-12855499	9.24148	0.559077	0.541517	1.03243	0.301872	0.542831	7.40285	5.3541	11.5478	13.7218	8.18083
54	Chr1:13085611-13086254	21.115	0.939977	0.441342	2.12982	0.0331867	0.145101	11.8446	13.3852	31.247	25.9993	23.0988
55	Chr1:13094393-13094830	15.0551	1.07162	0.49426	2.16814	0.0301482	0.136256	5.92228	10.7082	20.3785	18.055	20.2115
56	Chr1:13362789-13363355	40.4756	-1.65788	0.32098	-5.16506	2.4e-07	1.2e-05	63.6645	77.6344	23.7749	18.055	19.249
57	Chr1:13416506-13417076	15.5144	0.926969	0.48883	1.8963	0.0579203	0.206872	5.92228	13.3852	14.9442	20.2217	23.0988
58	Chr1:13579456-13580313	41.8359	-1.76828	0.316312	-5.5903	2.27e-08	1.64e-06	66.6256	82.9885	21.0578	18.7772	19.7302
59	Chr1:13649757-13650687	53.8813	-0.625166	0.294158	-2.12527	0.033564	0.146077	66.6256	72.2803	37.3605	45.4987	47.6413
60	Chr1:14299387-14299712	13.2482	0.703055	0.49745	1.41332	0.157562	0.375677	13.3251	2.67705	16.3028	19.4995	14.4368
61	Chr1:14299474-14300327	50.6067	-0.282511	0.301872	-0.935864	0.349343	0.585676	62.1839	50.8639	43.4741	51.2763	45.2352
62	Chr1:14496409-14496884	10.1281	0.244084	0.517576	0.471592	0.637218	0.806583	7.40285	10.7082	10.8685	11.5552	10.1057
63	Chr1:14745137-14745651	20.4946	-0.381529	0.405399	-0.941122	0.346642	0.583286	31.092	16.0623	19.6992	17.3328	18.2866
64	Chr1:14908583-14909174	17.2699	0.257692	0.447486	0.575865	0.564707	0.759911	10.364	21.4164	16.3028	18.055	20.2115
65	Chr1:14909098-14909517	7.69448	0.873267	0.579134	1.50788	0.131584	0.337884	1.48057	8.03114	10.1892	7.22202	11.5494
66	Chr1:15276558-15277050	20.014	-0.828091	0.405641	-2.04144	0.0412072	0.167026	22.2085	34.8016	15.6235	12.9996	14.4368
67	Chr1:15277046-15277685	17.2659	0.650938	0.458445	1.41988	0.155642	0.372625	13.3251	10.7082	19.6992	16.6106	25.9862
68	Chr1:15487626-15488090	4.58975	1.02874	0.622898	1.65154	0.0986283	0.285322	2.96114	0	7.47211	7.22202	5.29348
69	Chr1:15781233-15781856	23.2845	-0.0972139	0.404309	-0.240445	0.809985	0.906109	17.7668	32.1246	25.1335	24.5549	16.8429
70	Chr1:15795442-15796110	34.9648	-1.59626	0.333705	-4.78344	1.72e-06	6.52e-05	56.2617	64.2492	20.3785	16.6106	17.3241
71	Chr1:15796047-15796834	41.2995	0.247886	0.330287	0.750518	0.452943	0.675302	38.4948	34.8016	44.1534	41.8877	47.1601
72	Chr1:15873499-15873971	6.36053	1.33782	0.608665	2.19796	0.0279518	0.129553	1.48057	2.67705	8.15139	7.94422	11.5494
73	Chr1:15882687-15883406	27.4722	-0.541184	0.367016	-1.47455	0.140334	0.351376	29.6114	40.1557	19.6992	25.2771	22.6176
74	Chr1:16082935-16083563	19.1757	-0.7699	0.415463	-1.85312	0.0638659	0.219944	19.2474	34.8016	12.2271	13.7218	15.8804
75	Chr1:16093760-16094321	42.9578	0.142357	0.330424	0.430831	0.666591	0.823644	44.4171	34.8016	44.8327	52.7207	38.0168
76	Chr1:16508539-16509230	20.2291	0.0174469	0.428061	0.0407579	0.967489	0.984054	19.2474	21.4164	21.737	12.2774	26.4674
77	Chr1:16509839-16510268	20.8483	-0.830728	0.395793	-2.0989	0.035826	0.152578	26.6503	32.1246	15.6235	14.444	15.3992
78	Chr1:16608453-16609137	36.0147	-0.531581	0.351703	-1.51145	0.130675	0.336769	28.1308	64.2492	29.2092	31.0547	27.4299
79	Chr1:16609448-16609936	16.7345	0.359247	0.449039	0.800036	0.42369	0.651363	16.2863	10.7082	21.0578	18.7772	16.8429
80	Chr1:16645748-16646834	73.3259	0.497176	0.291998	1.70267	0.0886307	0.267269	54.7811	61.5721	80.8346	99.6639	69.7777
81	Chr1:16646597-16647167	43.7024	-0.788081	0.318941	-2.47093	0.0134762	0.0798778	45.8977	74.9573	35.3227	31.0547	31.2797
82	Chr1:16655369-16656087	32.8012	-0.043321	0.355486	-0.121864	0.903007	0.955289	28.1308	40.1557	27.8506	31.7769	36.0919
83	Chr1:16678321-16678933	14.0673	1.24087	0.513713	2.4155	0.0157138	0.088959	8.88342	2.67705	18.3406	24.5549	15.8804
84	Chr1:17086812-17087251	13.0677	0.739949	0.498025	1.48577	0.13734	0.347001	8.88342	8.03114	18.3406	13.7218	16.3617
85	Chr1:17087442-17087924	13.7569	0.22309	0.47785	0.466861	0.640599	0.807789	17.7668	5.3541	16.3028	11.5552	17.8053
86	Chr1:17135331-17135829	13.7903	0.718208	0.491291	1.46188	0.143775	0.356472	11.8446	5.3541	19.0199	18.7772	13.9555
87	Chr1:17135596-17136042	10.0081	0.695589	0.534265	1.30195	0.192932	0.421069	7.40285	5.3541	15.6235	10.1108	11.5494
88	Chr1:17241181-17241638	7.4205	0.348086	0.563816	0.617375	0.536987	0.740326	4.44171	8.03114	10.1892	7.22202	7.21838
89	Chr1:17717376-17717955	14.6456	0.0426118	0.461443	0.0923447	0.926424	0.967062	19.2474	8.03114	15.6235	17.3328	12.9931
90	Chr1:18048454-18048848	15.5049	-0.077271	0.451758	-0.171045	0.864188	0.936103	11.8446	21.4164	15.6235	13.7218	14.918
91	Chr1:18048645-18049112	14.5087	0.479489	0.480462	0.997975	0.318291	0.557746	7.40285	16.0623	15.6235	19.4995	13.9555
92	Chr1:19195775-19196215	8.99751	1.20044	0.57186	2.09918	0.0358006	0.152542	4.44171	2.67705	10.1892	18.055	9.62451
93	Chr1:20467608-20468103	8.44521	1.13431	0.573439	1.97809	0.0479184	0.184341	4.44171	2.67705	8.15139	14.444	12.5119
94	Chr1:20476244-20476740	5.82007	0.822497	0.604273	1.36114	0.173471	0.397507	1.48057	5.3541	9.50996	6.49982	6.25593
95	Chr1:20809086-20809967	45.6917	0.186223	0.339483	0.548547	0.583316	0.772358	42.9365	40.1557	53.6633	58.4984	33.2046
96	Chr1:20880544-20881044	24.3389	-0.769041	0.385518	-1.99483	0.0460617	0.179571	25.1697	42.8328	14.9442	18.055	20.6927
97	Chr1:20881070-20881539	20.1036	0.0810539	0.415568	0.195044	0.845359	0.925249	17.7668	21.4164	19.6992	19.4995	22.1364
98	Chr1:20941575-20942054	14.667	-0.101952	0.455176	-0.223983	0.82277	0.912499	14.8057	16.0623	13.5857	15.8884	12.9931
99	Chr1:20941808-20942323	16.4428	-0.220322	0.435259	-0.506187	0.612726	0.791578	17.7668	18.7393	15.6235	15.1662	14.918
100	Chr1:21068884-21069406	18.0304	-0.287231	0.424195	-0.677121	0.498329	0.710824	22.2085	18.7393	13.5857	15.8884	19.7302
101	Chr1:21069431-21069969	26.3405	-0.5856	0.370591	-1.58018	0.114066	0.311483	28.1308	40.1557	21.0578	20.2217	22.1364
102	Chr1:21156406-21157054	15.6604	0.550971	0.46764	1.17819	0.23872	0.475712	10.364	13.3852	20.3785	14.444	19.7302
103	Chr1:21208541-21209007	19.5141	-0.247213	0.423869	-0.58323	0.559739	0.756948	13.3251	32.1246	16.9821	18.7772	16.3617
104	Chr1:21208786-21209334	20.775	0.0664008	0.415607	0.159768	0.873064	0.940542	14.8057	26.7705	19.6992	22.3883	20.2115
105	Chr1:21450935-21451385	4.25263	1.22789	0.631331	1.94492	0.0517843	0.193365	0	2.67705	6.79283	6.49982	5.29348
106	Chr1:21952116-21952577	11.5703	0.53661	0.506499	1.05945	0.289395	0.530465	8.88342	8.03114	14.9442	12.9996	12.9931
107	Chr1:22539731-22540184	15.7334	0.497508	0.468885	1.06105	0.288669	0.529798	8.88342	16.0623	18.3406	20.9439	14.4368
108	Chr1:22540025-22540546	23.7789	-0.559605	0.388122	-1.44182	0.149352	0.363545	23.6891	37.4787	19.6992	21.6661	16.3617
109	Chr1:22812706-22813119	6.54787	0.471852	0.584729	0.806958	0.41969	0.648132	4.44171	5.3541	10.1892	3.61101	9.14328
110	Chr1:22812886-22813353	8.4194	0.546109	0.562119	0.971519	0.33129	0.569345	4.44171	8.03114	14.9442	5.05541	9.62451
111	Chr1:23262802-23263403	26.7172	-2.38035	0.389867	-6.10554	1.02e-09	1.05e-07	59.2228	48.1869	4.75498	13.7218	7.69961
112	Chr1:23263650-23264269	19.1151	0.675817	0.441391	1.53111	0.125742	0.329462	13.3251	13.3852	22.4163	20.9439	25.505
113	Chr1:23389220-23389841	24.4763	-0.437293	0.381025	-1.14767	0.251103	0.489648	25.1697	34.8016	21.737	19.4995	21.1739
114	Chr1:23769225-23769853	24.2069	0.188801	0.399601	0.472474	0.636588	0.806482	20.728	24.0934	20.3785	24.5549	31.2797
115	Chr1:23891854-23892326	5.77245	0.443196	0.596914	0.742478	0.457798	0.679101	1.48057	8.03114	6.11354	6.49982	6.73716
116	Chr1:23928335-23929080	23.8718	-0.419016	0.383928	-1.09139	0.275101	0.515474	32.5725	24.0934	21.0578	18.055	23.58
117	Chr1:23965870-23966458	11.9182	1.03549	0.530271	1.95275	0.0508493	0.191166	2.96114	10.7082	12.2271	17.3328	16.3617
118	Chr1:24011655-24012585	37.5508	0.380094	0.352276	1.07897	0.280602	0.521262	32.5725	29.4475	36.6813	51.9985	37.0544
119	Chr1:24593347-24593741	8.82305	-0.0999157	0.525428	-0.19016	0.849183	0.927461	10.364	8.03114	8.15139	7.94422	9.62451
120	Chr1:24685437-24686137	28.9628	-0.432717	0.357197	-1.21143	0.225732	0.461737	37.0142	32.1246	25.1335	25.9993	24.5425
121	Chr1:25285226-25285700	9.83552	1.05258	0.552088	1.90654	0.0565806	0.203714	4.44171	5.3541	12.9064	15.8884	10.587
122	Chr1:30929394-30929946	37.7451	0.289152	0.348811	0.828965	0.407124	0.63706	39.9754	24.0934	34.6434	47.6653	42.3478
123	Chr1:30930334-30930828	26.8953	-2.17368	0.371415	-5.85242	4.84e-09	4.34e-07	48.8588	56.218	10.8685	7.94422	10.587
124	Chr1:31005245-31005809	33.8886	0.410665	0.362125	1.13404	0.256777	0.495954	32.5725	21.4164	39.3984	43.3321	32.7233
125	Chr1:31005598-31005958	27.1004	0.05091	0.381283	0.133523	0.89378	0.951047	28.1308	24.0934	30.5677	31.0547	21.6551
126	Chr1:31006357-31006997	54.5347	-2.74542	0.30694	-8.94451	3.74e-19	3.68e-16	125.848	101.728	17.6613	11.5552	15.8804
127	Chr1:32229064-32229538	10.2608	0.517491	0.526982	0.981989	0.326105	0.565021	13.3251	0	12.2271	12.2774	13.4743
128	Chr1:32229476-32230194	19.7524	0.0314373	0.42426	0.0740993	0.940931	0.973067	26.6503	10.7082	22.4163	15.8884	23.0988
129	Chr1:32322765-32323238	5.09282	0.291111	0.601042	0.484343	0.628142	0.801164	7.40285	0	7.47211	4.33321	6.25593
130	Chr1:33588498-33588888	3.34653	0.976362	0.634914	1.53779	0.124101	0.327236	0	2.67705	6.11354	3.61101	4.33103
131	Chr1:33692757-33693236	14.5798	0.113509	0.461965	0.245709	0.805907	0.903933	16.2863	10.7082	16.3028	12.2774	17.3241
132	Chr1:33693120-33693449	8.89823	0.921226	0.556883	1.65425	0.0980761	0.284499	4.44171	5.3541	10.8685	12.2774	11.5494
133	Chr1:33725903-33726714	34.9721	0.344232	0.353765	0.973052	0.330527	0.568606	34.0531	24.0934	34.6434	42.6099	39.4605
134	Chr1:33726633-33727746	53.7546	0.0296047	0.298684	0.0991172	0.921045	0.963745	54.7811	50.8639	54.3426	56.3317	52.4536
135	Chr1:33776851-33777744	39.3115	-0.115912	0.330696	-0.350511	0.725955	0.860366	44.4171	37.4787	36.6813	43.3321	34.6482
136	Chr1:33814254-33814822	25.4729	-1.08388	0.368051	-2.94492	0.00323041	0.0292725	37.0142	40.1557	16.9821	15.8884	17.3241
137	Chr1:33870471-33870936	23.2951	0.318318	0.404229	0.78747	0.431007	0.657876	20.728	18.7393	23.0956	30.3325	23.58
138	Chr1:33870835-33871485	40.6926	-0.684481	0.338519	-2.02199	0.0431776	0.172126	53.3005	53.541	44.1534	28.8881	23.58
139	Chr1:33871421-33872194	28.7283	1.30186	0.415909	3.13015	0.00174718	0.018587	17.7668	8.03114	43.4741	39.7211	34.6482
140	Chr1:33964790-33965229	30.893	-1.81007	0.357018	-5.06996	3.98e-07	1.85e-05	50.3394	61.5721	12.2271	18.7772	11.5494
141	Chr1:33965181-33965653	23.9777	-0.391761	0.400102	-0.979152	0.327505	0.56636	16.2863	42.8328	21.0578	20.9439	18.7678
142	Chr1:34062650-34063107	21.6472	0.428193	0.420677	1.01787	0.308741	0.549008	16.2863	18.7393	29.8884	23.1105	20.2115
143	Chr1:34068635-34069152	23.1058	0.237778	0.407594	0.583371	0.559644	0.756948	22.2085	18.7393	27.1713	18.055	29.3548
144	Chr1:34134353-34134836	24.2882	0.73641	0.419348	1.75608	0.0790741	0.250203	20.728	10.7082	23.0956	37.5545	29.3548
145	Chr1:34234571-34235043	11.8946	0.641125	0.506891	1.26482	0.205936	0.437254	10.364	5.3541	12.2271	15.1662	16.3617
146	Chr1:34359528-34359928	5.67884	0.614058	0.596433	1.02955	0.303221	0.543647	4.44171	2.67705	6.11354	6.49982	8.66206
147	Chr1:34496206-34496679	35.2629	-1.24307	0.334819	-3.71268	0.00020508	0.0034981	66.6256	42.8328	23.7749	22.3883	20.6927
148	Chr1:34496662-34497195	30.5014	-0.932764	0.34746	-2.68452	0.00726332	0.0524125	44.4171	42.8328	22.4163	23.1105	19.7302
149	Chr1:34515942-34516418	17.7751	0.652762	0.456593	1.42963	0.152822	0.368317	17.7668	5.3541	18.3406	26.7215	20.6927
150	Chr1:34516558-34517151	25.8419	-0.165451	0.377277	-0.43854	0.660995	0.82007	26.6503	29.4475	23.7749	22.3883	26.9486
151	Chr1:34542213-34542691	9.29936	0.643561	0.540056	1.19166	0.233396	0.469754	8.88342	2.67705	10.8685	12.9996	11.0682
152	Chr1:34593460-34593868	8.48977	1.3385	0.582174	2.29915	0.0214967	0.109315	1.48057	5.3541	11.5478	10.1108	13.9555
153	Chr1:34593675-34594146	10.4592	1.23848	0.562761	2.20073	0.0277552	0.128979	0	10.7082	12.2271	11.5552	17.8053
154	Chr1:34636032-34636564	16.4889	0.207864	0.45524	0.456604	0.647955	0.812444	22.2085	5.3541	19.0199	20.9439	14.918
155	Chr1:34692467-34692939	8.85022	0.76554	0.550101	1.39164	0.164033	0.385119	7.40285	2.67705	11.5478	11.5552	11.0682
156	Chr1:34734656-34735133	14.2333	0.212148	0.476294	0.445413	0.656021	0.81688	20.728	2.67705	13.5857	17.3328	16.8429
157	Chr1:34858428-34859172	34.3326	-0.846685	0.337297	-2.51021	0.0120661	0.0740352	47.3782	48.1869	29.8884	23.1105	23.0988
158	Chr1:34898823-34899496	38.0084	0.763764	0.357307	2.13756	0.0325528	0.143344	31.092	18.7393	47.5498	49.8319	42.8291
159	Chr1:34899878-34900503	32.3955	-0.528047	0.344319	-1.5336	0.125128	0.328524	42.9365	37.4787	27.1713	24.5549	29.836
160	Chr1:35926501-35927040	14.7902	-2.39697	0.459592	-5.21543	1.83e-07	9.54e-06	26.6503	34.8016	4.0757	3.61101	4.81226
161	Chr1:36087429-36087905	7.43873	0.588062	0.570748	1.03034	0.302853	0.54328	2.96114	8.03114	8.15139	7.94422	10.1057
162	Chr1:36160403-36161050	13.0546	0.0825406	0.482167	0.171187	0.864077	0.936062	11.8446	13.3852	17.6613	9.38862	12.9931
163	Chr1:36300046-36301253	64.8687	-0.0455425	0.297108	-0.153286	0.878173	0.942524	47.3782	88.3426	58.4183	65.7204	64.4842
164	Chr1:36325855-36326520	18.7831	0.392361	0.433885	0.904299	0.365837	0.600373	14.8057	16.0623	23.0956	20.2217	19.7302
165	Chr1:36326270-36326622	12.6944	-0.28062	0.474298	-0.591654	0.554082	0.752994	13.3251	16.0623	12.9064	8.66642	12.5119
166	Chr1:36364001-36364472	10.6691	1.22511	0.547041	2.23953	0.0251217	0.12093	5.92228	2.67705	15.6235	16.6106	12.5119
167	Chr1:36364441-36364973	24.8027	-0.953637	0.375326	-2.54082	0.0110592	0.0699689	32.5725	40.1557	14.9442	16.6106	19.7302
168	Chr1:36371107-36372009	34.4641	0.764487	0.370967	2.0608	0.0393226	0.162184	26.6503	18.7393	48.2291	42.6099	36.0919
169	Chr1:36372004-36372459	13.0025	0.131823	0.476624	0.276576	0.782106	0.891404	13.3251	10.7082	14.2649	12.2774	14.4368
170	Chr1:36425037-36425627	28.9776	0.112601	0.368384	0.305663	0.759861	0.878639	28.1308	26.7705	27.1713	31.0547	31.7609
171	Chr1:36425553-36426130	28.3579	-1.49108	0.362132	-4.11751	3.83e-05	0.000889893	39.9754	56.218	13.5857	18.055	13.9555
172	Chr1:36501353-36502203	38.9247	-0.678178	0.321981	-2.10627	0.0351812	0.15091	48.8588	53.541	29.8884	32.4991	29.836
173	Chr1:36527891-36528450	30.4508	-0.574075	0.359215	-1.59814	0.110012	0.304998	37.0142	40.1557	23.0956	31.7769	20.2115
174	Chr1:36528505-36529090	21.332	0.0187399	0.406823	0.0460639	0.963259	0.982699	25.1697	16.0623	19.6992	24.5549	21.1739
175	Chr1:36568215-36568678	24.3328	-0.938637	0.376043	-2.49609	0.0125572	0.0759751	35.5337	34.8016	14.2649	18.7772	18.2866
176	Chr1:36569106-36569588	28.2153	-1.81637	0.368246	-4.9325	8.12e-07	3.41e-05	44.4171	58.8951	15.6235	8.66642	13.4743
177	Chr1:36603339-36603837	14.7115	0.888043	0.487998	1.81977	0.0687942	0.229745	7.40285	10.7082	17.6613	18.055	19.7302
178	Chr1:36603596-36604162	22.9197	-0.273677	0.389825	-0.702052	0.482646	0.698923	29.6114	21.4164	22.4163	19.4995	21.6551
179	Chr1:36614104-36614558	19.2079	-0.0738768	0.418456	-0.176546	0.859865	0.933445	25.1697	13.3852	19.6992	18.055	19.7302
180	Chr1:36636828-36637289	7.45547	0.897322	0.57864	1.55074	0.120963	0.321978	2.96114	5.3541	10.1892	10.1108	8.66206
181	Chr1:36729693-36730088	4.76151	0.146574	0.611054	0.239871	0.81043	0.906189	1.48057	8.03114	6.11354	2.88881	5.29348
182	Chr1:36739060-36739646	22.7543	0.481559	0.427466	1.12654	0.259936	0.499309	14.8057	21.4164	18.3406	36.1101	23.0988
183	Chr1:36748419-36749311	35.9839	0.115749	0.344111	0.336371	0.736591	0.866149	39.9754	26.7705	37.3605	39.7211	36.0919
184	Chr1:36766096-36766919	38.9901	-0.330386	0.328559	-1.00556	0.314627	0.554666	39.9754	50.8639	36.002	31.0547	37.0544
185	Chr1:36815737-36816237	8.80988	-0.096077	0.539345	-0.178136	0.858616	0.932934	5.92228	13.3852	12.2271	5.77761	6.73716
186	Chr1:36827540-36828122	15.0644	0.19859	0.468807	0.423606	0.671853	0.827167	22.2085	2.67705	16.9821	18.055	15.3992
187	Chr1:36841606-36842245	14.4543	0.672217	0.483809	1.38943	0.164703	0.386374	7.40285	13.3852	15.6235	16.6106	19.249
188	Chr1:36995423-36995855	34.3166	0.262335	0.354543	0.739925	0.459346	0.680216	26.6503	34.8016	36.002	40.4433	33.6858
189	Chr1:37058653-37059138	8.6126	0.319737	0.546679	0.584872	0.558634	0.756131	4.44171	10.7082	11.5478	7.22202	9.14328
190	Chr1:37085730-37086122	13.5466	-0.553096	0.459388	-1.20398	0.228595	0.464489	20.728	13.3852	8.83067	12.2774	12.5119
191	Chr1:37086019-37086506	13.0993	-0.0955786	0.471553	-0.202689	0.839378	0.9223	16.2863	10.7082	11.5478	11.5552	15.3992
192	Chr1:37157358-37158259	39.0467	0.477408	0.349038	1.36778	0.17138	0.394734	34.0531	26.7705	44.1534	52.7207	37.5356
193	Chr1:37356758-37357447	26.3438	0.140854	0.381425	0.369282	0.711917	0.851576	25.1697	24.0934	24.4542	28.1659	29.836
194	Chr1:37458631-37459088	9.1654	-0.0348423	0.524023	-0.06649	0.946988	0.976217	10.364	8.03114	11.5478	7.22202	8.66206
195	Chr1:37486092-37486996	53.5488	-0.0463169	0.299434	-0.154681	0.877072	0.94212	57.7422	50.8639	48.9084	57.7761	52.4536
196	Chr1:37486903-37487589	49.1627	-0.498806	0.304699	-1.63704	0.101621	0.290531	63.6645	56.218	37.3605	49.1097	39.4605
197	Chr1:37487343-37487931	35.0729	-0.00928282	0.346617	-0.0267812	0.978634	0.989647	39.9754	29.4475	29.8884	38.9989	37.0544
198	Chr1:37596834-37597273	13.4511	0.682959	0.497692	1.37225	0.169985	0.392682	11.8446	5.3541	11.5478	21.6661	16.8429
199	Chr1:37597046-37597479	12.787	0.744408	0.509266	1.46173	0.143816	0.356488	10.364	5.3541	10.1892	21.6661	16.3617
200	Chr1:37597889-37598361	16.3628	-0.471171	0.433988	-1.08568	0.277621	0.517744	19.2474	21.4164	11.5478	13.7218	15.8804
201	Chr1:37776686-37777291	20.2197	0.280759	0.422408	0.664663	0.506266	0.716718	20.728	13.3852	21.737	25.9993	19.249
202	Chr1:37921042-37921779	34.625	-0.372966	0.347139	-1.0744	0.282643	0.523512	50.3394	29.4475	31.247	25.9993	36.0919
203	Chr1:37922073-37922705	30.8667	0.0569037	0.36161	0.157362	0.87496	0.941442	37.0142	21.4164	32.6056	32.4991	30.7984
204	Chr1:37928971-37929825	32.5103	0.397156	0.36215	1.09666	0.27279	0.513035	31.092	21.4164	37.3605	34.6657	38.0168
205	Chr1:37946593-37947343	41.2302	0.0265887	0.335867	0.0791644	0.936902	0.971644	50.3394	29.4475	38.0398	38.2767	50.0475
206	Chr1:37947577-37948175	29.9799	0.58108	0.387858	1.49818	0.134087	0.341948	14.8057	32.1246	31.247	38.9989	32.7233
207	Chr1:37979712-37980171	11.0744	1.27426	0.548849	2.3217	0.020249	0.105047	5.92228	2.67705	10.1892	20.2217	16.3617
208	Chr1:38053306-38053853	31.5355	0.174449	0.360161	0.484365	0.628127	0.801164	26.6503	32.1246	34.6434	31.0547	33.2046
209	Chr1:38055509-38056050	23.5252	1.51652	0.452797	3.34923	0.000810377	0.0101862	10.364	8.03114	33.2849	36.1101	29.836
210	Chr1:38184910-38185999	75.4003	0.716184	0.291382	2.45789	0.0139755	0.0819804	44.4171	64.2492	88.3067	99.6639	80.3647
211	Chr1:38266896-38267276	10.2402	-0.0596109	0.50887	-0.117144	0.906746	0.956856	14.8057	5.3541	11.5478	7.94422	11.5494
212	Chr1:38267054-38267368	9.7349	-0.214494	0.515386	-0.416181	0.677277	0.830006	13.3251	8.03114	9.50996	5.77761	12.0306
213	Chr1:38274857-38275329	6.89762	1.12928	0.593947	1.90131	0.0572615	0.2053	2.96114	2.67705	8.15139	11.5552	9.14328
214	Chr1:38683247-38683719	17.2978	-0.194556	0.433121	-0.449196	0.65329	0.815641	14.8057	24.0934	16.3028	14.444	16.8429
215	Chr1:38857377-38857814	4.70042	0.642505	0.613979	1.04646	0.295348	0.537284	2.96114	2.67705	6.79283	5.77761	5.29348
216	Chr1:38953972-38954855	32.7546	0.596447	0.3681	1.62034	0.105159	0.296681	26.6503	21.4164	35.3227	37.5545	42.8291
217	Chr1:38954734-38955223	22.1789	-0.116402	0.399237	-0.291562	0.770622	0.884811	25.1697	21.4164	18.3406	20.9439	25.0237
218	Chr1:39044051-39044545	21.6644	0.13987	0.420464	0.332655	0.739395	0.867401	14.8057	26.7705	21.737	28.1659	16.8429
219	Chr1:39044542-39045545	50.6525	0.05649	0.307271	0.183844	0.854136	0.930269	50.3394	48.1869	46.1912	57.0539	51.4911
220	Chr1:39401906-39402397	9.79531	0.478365	0.529253	0.903849	0.366076	0.600638	8.88342	5.3541	10.1892	14.444	10.1057
221	Chr1:39425833-39426791	48.0411	0.689148	0.32715	2.10652	0.035159	0.150891	39.9754	26.7705	58.4183	56.3317	58.7095
222	Chr1:39447671-39448143	7.14149	0.252291	0.567204	0.444797	0.656466	0.81726	8.88342	2.67705	10.1892	4.33321	9.62451
223	Chr1:39534774-39535366	33.9938	-0.265319	0.346254	-0.766256	0.443524	0.668083	38.4948	37.4787	28.5299	37.5545	27.9111
224	Chr1:39535178-39535711	29.6398	-0.96609	0.355556	-2.71712	0.00658525	0.0491825	38.4948	48.1869	24.4542	17.3328	19.7302
225	Chr1:39535601-39536058	20.9674	0.151386	0.416458	0.363508	0.716225	0.854248	17.7668	21.4164	23.7749	24.5549	17.3241
226	Chr1:39592498-39593154	41.5334	-1.0833	0.317994	-3.40666	0.00065763	0.00862154	53.3005	72.2803	26.492	25.2771	30.3172
227	Chr1:39593221-39593733	19.6008	0.608038	0.435843	1.39509	0.16299	0.383548	14.8057	13.3852	26.492	21.6661	21.6551
228	Chr1:39632880-39633502	28.2379	1.08462	0.406664	2.66713	0.00765028	0.0543024	13.3251	18.7393	36.6813	38.2767	34.167
229	Chr1:39633361-39633860	29.1102	-0.328216	0.364176	-0.901257	0.367452	0.602106	32.5725	34.8016	31.247	20.9439	25.9862
230	Chr1:39633662-39634308	43.1497	-1.26272	0.328343	-3.84573	0.000120194	0.00224255	66.6256	69.6033	36.6813	18.7772	24.0613
231	Chr1:39634270-39634742	19.6644	0.216335	0.42384	0.510415	0.609761	0.789874	14.8057	21.4164	19.0199	20.9439	22.1364
232	Chr1:39671523-39672018	7.41141	1.28391	0.591444	2.17081	0.0299459	0.135672	4.44171	0	9.50996	12.9996	10.1057
233	Chr1:39777497-39777983	11.6275	-0.631948	0.486142	-1.29992	0.193627	0.42183	10.364	21.4164	9.50996	8.66642	8.18083
234	Chr1:39941778-39942290	11.9697	0.394024	0.498036	0.791155	0.428854	0.655917	8.88342	10.7082	14.2649	11.5552	14.4368
235	Chr1:39993191-39993679	11.3864	0.411589	0.504681	0.815542	0.414762	0.64382	11.8446	5.3541	14.9442	12.2774	12.5119
236	Chr1:40112244-40112716	7.89468	0.525662	0.557763	0.942446	0.345964	0.582642	5.92228	5.3541	10.8685	8.66642	8.66206
237	Chr1:40142643-40143120	14.4146	-0.646296	0.448977	-1.43948	0.150013	0.364531	19.2474	18.7393	12.9064	11.5552	9.62451
238	Chr1:40158207-40158619	4.66202	0.968855	0.62154	1.5588	0.119044	0.319191	1.48057	2.67705	5.43426	6.49982	7.21838
239	Chr1:40323246-40323870	18.8385	-0.156418	0.417677	-0.374495	0.708036	0.849238	23.6891	16.0623	18.3406	17.3328	18.7678
240	Chr1:40370789-40371232	4.54002	0.934865	0.623011	1.50056	0.133469	0.340886	1.48057	2.67705	7.47211	4.33321	6.73716
241	Chr1:40382293-40383142	19.8127	0.36308	0.43325	0.838038	0.402009	0.632456	25.1697	5.3541	23.7749	21.6661	23.0988
242	Chr1:40847177-40847650	13.0845	0.244663	0.481058	0.508593	0.611037	0.790712	16.2863	5.3541	15.6235	13.7218	14.4368
243	Chr1:42548476-42549021	17.002	-0.183777	0.460275	-0.399276	0.68969	0.83813	7.40285	32.1246	11.5478	16.6106	17.3241
244	Chr1:42907617-42908069	17.6596	-0.352329	0.423036	-0.832859	0.404924	0.635441	22.2085	18.7393	16.3028	16.6106	14.4368
245	Chr1:42907976-42908686	39.3663	-0.811585	0.32786	-2.4754	0.0133088	0.0791901	54.7811	53.541	35.3227	22.3883	30.7984
246	Chr1:42908631-42909103	16.9924	0.377475	0.453354	0.832628	0.405055	0.63549	10.364	18.7393	14.9442	20.2217	20.6927
247	Chr1:43009542-43010084	17.9844	-0.209643	0.42862	-0.489112	0.624762	0.798908	16.2863	24.0934	19.6992	14.444	15.3992
248	Chr1:43009832-43010394	19.5298	-0.36865	0.414504	-0.889377	0.373801	0.608248	17.7668	29.4475	16.9821	15.1662	18.2866
249	Chr1:43149075-43149930	39.252	-0.559419	0.323995	-1.72663	0.0842345	0.260136	45.8977	53.541	33.2849	28.8881	34.6482
250	Chr1:43154714-43155416	33.1105	0.397804	0.362729	1.0967	0.272773	0.513035	34.0531	18.7393	40.0777	34.6657	38.0168
251	Chr1:43155129-43155661	31.3641	-0.814066	0.347275	-2.34415	0.0190705	0.101249	41.456	45.5098	25.8127	19.4995	24.5425
252	Chr1:43155526-43155963	30.8823	-0.755405	0.352425	-2.14345	0.0320771	0.142089	38.4948	45.5098	28.5299	20.2217	21.6551
253	Chr1:43155697-43156248	38.4936	-0.121063	0.340242	-0.355814	0.72198	0.858134	34.0531	48.1869	42.1155	38.2767	29.836
254	Chr1:43220372-43221020	19.4	0.0492412	0.419835	0.117287	0.906633	0.956856	19.2474	18.7393	18.3406	18.055	22.6176
255	Chr1:43282686-43283194	5.87105	0.998677	0.604225	1.65282	0.0983669	0.284795	4.44171	0	9.50996	8.66642	6.73716
256	Chr1:43501952-43502643	30.1276	-0.443826	0.355572	-1.2482	0.211957	0.44494	35.5337	37.4787	28.5299	21.6661	27.4299
257	Chr1:43787274-43787957	12.2708	0.785376	0.512089	1.53367	0.12511	0.328511	13.3251	0	16.9821	15.1662	15.8804
258	Chr1:43883716-43884686	46.6104	-0.675213	0.311145	-2.17009	0.0299997	0.13585	48.8588	74.9573	38.7191	33.9435	36.5731
259	Chr1:43884846-43885484	19.1836	0.619733	0.447422	1.38512	0.166016	0.387961	22.2085	2.67705	22.4163	24.5549	24.0613
260	Chr1:43939452-43939790	7.70988	-0.0841374	0.546948	-0.153831	0.877743	0.942363	10.364	5.3541	8.15139	5.05541	9.62451
261	Chr1:43939596-43939997	7.01436	0.215506	0.563086	0.382723	0.701925	0.845671	8.88342	2.67705	8.83067	6.49982	8.18083
262	Chr1:43990757-43991731	64.5289	-0.452867	0.279063	-1.62281	0.104629	0.295707	84.3925	69.6033	58.4183	59.2206	51.0099
263	Chr1:43991483-43991912	20.9368	0.428989	0.430252	0.997062	0.318734	0.557948	19.2474	13.3852	29.2092	25.9993	16.8429
264	Chr1:44098839-44099474	10.5094	1.0094	0.538448	1.87465	0.0608405	0.213676	7.40285	2.67705	13.5857	15.8884	12.9931
265	Chr1:44158491-44158951	19.1619	0.173812	0.429365	0.404813	0.685615	0.835318	25.1697	8.03114	22.4163	19.4995	20.6927
266	Chr1:44158912-44159353	15.6067	-0.646209	0.4383	-1.47435	0.140386	0.351422	22.2085	18.7393	14.9442	10.1108	12.0306
267	Chr1:44174751-44175339	35.9898	0.98265	0.385695	2.54774	0.0108424	0.0691438	25.1697	16.0623	40.757	61.3872	36.5731
268	Chr1:44175098-44175740	41.8611	0.610673	0.34643	1.76276	0.0779413	0.248097	34.0531	26.7705	46.1912	59.9428	42.3478
269	Chr1:44204036-44204546	18.2271	0.380505	0.437567	0.869593	0.384523	0.617265	16.2863	13.3852	17.6613	21.6661	22.1364
270	Chr1:44204669-44205631	44.701	0.0443951	0.319551	0.13893	0.889506	0.948677	48.8588	37.4787	46.1912	49.1097	41.8666
271	Chr1:44608407-44609031	27.2238	-0.463776	0.37493	-1.23697	0.216099	0.450792	25.1697	42.8328	19.0199	23.1105	25.9862
272	Chr1:44608836-44609480	24.4652	-0.0733623	0.398296	-0.18419	0.853864	0.930033	17.7668	34.8016	19.6992	21.6661	28.3923
273	Chr1:45851879-45852349	23.7807	-0.127109	0.392682	-0.323694	0.74617	0.870891	32.5725	16.0623	23.0956	25.9993	21.1739
274	Chr1:45852226-45852765	35.9396	-0.827265	0.339106	-2.43955	0.0147055	0.084845	37.0142	64.2492	27.1713	25.2771	25.9862
275	Chr1:45852534-45853261	53.9575	-0.0981427	0.306033	-0.320693	0.748443	0.872194	51.8199	61.5721	42.7948	62.1094	51.4911
276	Chr1:45982096-45982578	15.8833	-0.279032	0.447483	-0.623558	0.532918	0.737547	22.2085	13.3852	14.9442	10.1108	18.7678
277	Chr1:45982404-45982954	23.6638	-0.441976	0.385126	-1.14762	0.251127	0.489658	28.1308	29.4475	17.6613	19.4995	23.58
278	Chr1:45982832-45983179	14.9235	-0.117053	0.456289	-0.256532	0.79754	0.899669	13.3251	18.7393	12.2271	17.3328	12.9931
279	Chr1:46123688-46124078	2.8664	0.935361	0.635025	1.47295	0.140765	0.351849	1.48057	0	6.11354	1.4444	5.29348
280	Chr1:46908936-46909684	30.1355	0.6119	0.380555	1.60792	0.107853	0.301855	26.6503	16.0623	36.002	39.7211	32.2421
281	Chr1:46909654-46910300	29.4097	-1.53412	0.359389	-4.26868	1.97e-05	0.000513929	44.4171	56.218	19.6992	12.2774	14.4368
282	Chr1:46951237-46951725	6.64835	1.08494	0.59542	1.82215	0.068432	0.229207	2.96114	2.67705	8.83067	10.1108	8.66206
283	Chr1:50694316-50694805	12.3465	0.443787	0.511349	0.867874	0.385463	0.617783	14.8057	2.67705	19.6992	15.8884	8.66206
284	Chr1:50983535-50984338	39.0389	-0.626214	0.326377	-1.91869	0.0550241	0.200459	59.2228	40.1557	33.9641	28.1659	33.6858
285	Chr1:50984065-50984597	31.6175	-1.39782	0.368145	-3.79694	0.000146495	0.00265026	63.6645	40.1557	21.0578	10.1108	23.0988
286	Chr1:50984482-50984965	23.1236	0.169585	0.40091	0.423	0.672295	0.827478	19.2474	24.0934	21.737	23.1105	27.4299
287	Chr1:51534240-51534725	28.1226	0.473595	0.383547	1.23478	0.216914	0.451543	20.728	24.0934	30.5677	35.3879	29.836
288	Chr1:51534875-51535417	35.228	-2.09073	0.341515	-6.12193	9.25e-10	9.63e-08	62.1839	72.2803	10.8685	17.3328	13.4743
289	Chr1:51535455-51535963	27.8023	0.296435	0.399867	0.741333	0.458492	0.679611	37.0142	8.03114	25.1335	34.6657	34.167
290	Chr1:51680526-51681333	27.5778	0.755966	0.634937	1.19062	0.233805	0.470197	25.1697	0	40.757	38.2767	33.6858
291	Chr1:51972215-51972673	24.0281	-0.526761	0.387013	-1.3611	0.173484	0.397507	32.5725	26.7705	24.4542	20.9439	15.3992
292	Chr1:52065360-52065954	20.2521	1.00488	0.455201	2.20754	0.0272761	0.127576	17.7668	2.67705	23.7749	32.4991	24.5425
293	Chr1:52103952-52104492	12.2062	0.131142	0.49762	0.263539	0.792135	0.896736	11.8446	10.7082	8.15139	18.7772	11.5494
294	Chr1:52170159-52170711	13.2503	0.203207	0.482303	0.421325	0.673518	0.827783	14.8057	8.03114	17.6613	15.1662	10.587
295	Chr1:52175672-52176287	26.661	-0.256067	0.381096	-0.671922	0.501634	0.712766	41.456	16.0623	27.1713	23.1105	25.505
296	Chr1:52176247-52177041	44.3337	-0.403123	0.312093	-1.29168	0.196469	0.42544	56.2617	48.1869	38.0398	36.8323	42.3478
297	Chr1:52288459-52289388	54.6345	0.0692446	0.298107	0.232281	0.81632	0.908922	54.7811	50.8639	57.0597	52.7207	57.7471
298	Chr1:52289703-52290219	34.1765	-2.06201	0.343988	-5.99444	2.04e-09	1.99e-07	65.1451	64.2492	17.6613	12.2774	11.5494
299	Chr1:52290411-52290879	18.745	0.744606	0.45409	1.63978	0.101051	0.289427	17.7668	5.3541	29.2092	18.7772	22.6176
300	Chr1:52556241-52556687	14.4526	1.30702	0.522839	2.49984	0.0124248	0.075441	2.96114	10.7082	13.5857	26.7215	18.2866
301	Chr1:52556487-52556983	22.7903	0.172158	0.41438	0.41546	0.677805	0.830266	16.2863	26.7705	16.9821	30.3325	23.58
302	Chr1:52687416-52688111	41.2756	-0.182351	0.330143	-0.55234	0.580715	0.770829	45.8977	42.8328	42.7948	44.0543	30.7984
303	Chr1:52687879-52688351	23.2169	0.501722	0.416322	1.20513	0.228153	0.464114	19.2474	16.0623	24.4542	34.6657	21.6551
304	Chr1:52783528-52783880	13.9963	-0.59095	0.474621	-1.2451	0.213095	0.446626	8.88342	29.4475	9.50996	8.66642	13.4743
305	Chr1:52783762-52784372	27.3528	-0.912171	0.365582	-2.49512	0.0125913	0.0761635	31.092	48.1869	19.6992	19.4995	18.2866
306	Chr1:52855976-52856448	4.71025	0.748709	0.614759	1.21789	0.223266	0.458726	4.44171	0	6.11354	5.77761	7.21838
307	Chr1:52873792-52874266	14.4342	0.44027	0.481498	0.914374	0.36052	0.595536	11.8446	10.7082	10.8685	22.3883	16.3617
308	Chr1:52874022-52874507	19.9993	0.312747	0.434473	0.71983	0.47163	0.690357	17.7668	16.0623	15.6235	30.3325	20.2115
309	Chr1:52874257-52874822	19.9673	-0.195356	0.409259	-0.477341	0.633119	0.804235	22.2085	21.4164	16.9821	19.4995	19.7302
310	Chr1:52901770-52902622	40.3754	0.347732	0.341494	1.01827	0.308551	0.548833	39.9754	26.7705	44.1534	51.9985	38.9793
311	Chr1:52950726-52951359	6.69598	1.45181	0.607344	2.39042	0.0168292	0.093033	2.96114	0	12.2271	10.1108	8.18083
312	Chr1:53008627-53009524	52.7932	0.615749	0.323594	1.90284	0.0570611	0.204839	44.4171	32.1246	58.4183	75.109	53.8973
313	Chr1:53010103-53010569	23.7417	-0.238273	0.422864	-0.563474	0.573112	0.766134	44.4171	5.3541	25.1335	24.5549	19.249
314	Chr1:53243889-53244545	12.0667	1.21003	0.531848	2.27514	0.0228976	0.113852	7.40285	2.67705	12.2271	18.7772	19.249
315	Chr1:53353239-53353972	44.9608	-0.311566	0.314261	-0.991427	0.321477	0.560833	60.7034	40.1557	42.1155	41.8877	39.9417
316	Chr1:53353867-53354808	53.5341	0.123864	0.313331	0.395315	0.692611	0.839785	63.6645	34.8016	49.5876	64.276	55.3409
317	Chr1:53370107-53370580	24.6108	-0.31275	0.387752	-0.806572	0.419913	0.648339	38.4948	16.0623	24.4542	20.9439	23.0988
318	Chr1:53370379-53371298	51.9187	0.486042	0.320031	1.51874	0.128829	0.334143	50.3394	29.4475	57.0597	67.887	54.8597
319	Chr1:53409052-53409686	29.116	-0.907869	0.357122	-2.54218	0.0110162	0.0698522	47.3782	34.8016	25.1335	18.055	20.2115
320	Chr1:53763281-53763759	9.05009	0.603115	0.541803	1.11316	0.265639	0.50575	8.88342	2.67705	11.5478	11.5552	10.587
321	Chr1:53840862-53841886	48.9393	0.27959	0.320363	0.872728	0.382811	0.615651	51.8199	32.1246	46.1912	57.7761	56.7846
322	Chr1:53880219-53880666	7.08969	1.51659	0.604621	2.50833	0.0121304	0.0743409	2.96114	0	11.5478	12.2774	8.66206
323	Chr1:53880412-53880897	8.79494	0.95847	0.559738	1.71235	0.0868314	0.26449	5.92228	2.67705	11.5478	13.7218	10.1057
324	Chr1:53923078-53923543	7.37778	0.949977	0.580601	1.6362	0.101798	0.290792	4.44171	2.67705	8.83067	12.2774	8.66206
325	Chr1:54250750-54251462	20.4333	0.109429	0.416987	0.262428	0.792991	0.897165	22.2085	16.0623	21.0578	17.3328	25.505
326	Chr1:54251256-54251882	28.5598	-1.3537	0.354806	-3.81532	0.000136007	0.00249755	47.3782	45.5098	17.6613	14.444	17.8053
327	Chr1:54251682-54252100	17.4455	-0.641867	0.426392	-1.50534	0.132235	0.339019	31.092	13.3852	12.9064	15.8884	13.9555
328	Chr1:54307519-54308311	35.8174	-0.208042	0.365844	-0.568663	0.569585	0.76333	54.7811	21.4164	40.0777	23.8327	38.9793
329	Chr1:54494912-54495959	48.7475	0.293224	0.31348	0.935385	0.34959	0.585713	44.4171	40.1557	52.3048	54.8873	51.9724
330	Chr1:54541243-54541683	12.1964	-0.075754	0.485854	-0.155919	0.876097	0.941716	16.2863	8.03114	10.1892	15.8884	10.587
331	Chr1:54613580-54614600	51.8839	0.246157	0.316823	0.776953	0.437186	0.663338	57.7422	32.1246	63.1733	56.3317	50.0475
332	Chr1:54982343-54982909	22.9111	-0.239001	0.389684	-0.61332	0.539665	0.742539	26.6503	24.0934	22.4163	20.2217	21.1739
333	Chr1:54982810-54983365	30.968	-0.926737	0.352837	-2.62653	0.00862597	0.0589729	38.4948	50.8639	26.492	20.2217	18.7678
334	Chr1:54983200-54983669	21.2118	-0.584958	0.39618	-1.47649	0.139811	0.350547	25.1697	29.4475	16.3028	18.7772	16.3617
335	Chr1:55082946-55083921	56.4575	1.24295	0.3332	3.73035	0.000191218	0.00331198	31.092	26.7705	74.7211	85.2198	64.4842
336	Chr1:55108915-55109619	28.7435	-0.297026	0.374308	-0.793533	0.427467	0.654695	39.9754	24.0934	34.6434	20.9439	24.0613
337	Chr1:55109647-55110535	43.0333	-0.844402	0.311989	-2.70652	0.00679933	0.0502534	53.3005	66.9262	32.6056	31.0547	31.2797
338	Chr1:55143072-55143587	36.7294	0.960273	0.371609	2.58409	0.00976354	0.0642633	26.6503	16.0623	47.5498	53.4429	39.9417
339	Chr1:55143832-55144278	43.2852	-0.360737	0.323995	-1.1134	0.265535	0.505693	38.4948	64.2492	40.757	38.2767	34.6482
340	Chr1:55144316-55144852	41.0806	-1.54183	0.330139	-4.67024	3.01e-06	0.000104506	54.7811	85.6655	27.1713	18.055	19.7302
341	Chr1:55187318-55188004	40.5397	0.300214	0.338831	0.886029	0.375602	0.609641	31.092	40.1557	41.4362	50.5541	39.4605
342	Chr1:55188086-55188727	41.3882	-0.97634	0.325982	-2.99507	0.00274384	0.0260329	44.4171	77.6344	27.8506	26.7215	30.3172
343	Chr1:55188527-55188986	24.8266	-0.0908341	0.38255	-0.237443	0.812313	0.907114	25.1697	26.7705	23.0956	24.5549	24.5425
344	Chr1:55293368-55293993	28.6945	0.485441	0.383194	1.26683	0.205217	0.436341	29.6114	13.3852	32.6056	34.6657	33.2046
345	Chr1:55294362-55294869	27.1576	-0.0482675	0.391918	-0.123157	0.901983	0.954994	17.7668	40.1557	28.5299	19.4995	29.836
346	Chr1:55294688-55295000	15.9055	0.495598	0.484996	1.02186	0.306847	0.547502	2.96114	24.0934	19.0199	15.1662	18.2866
347	Chr1:55420214-55420758	17.443	-0.459947	0.423743	-1.08544	0.277728	0.517836	23.6891	18.7393	14.9442	12.9996	16.8429
348	Chr1:55462181-55462669	12.9613	1.43973	0.535488	2.68862	0.00717477	0.0520901	4.44171	5.3541	16.9821	23.1105	14.918
349	Chr1:55462909-55463295	15.5303	0.0719626	0.458038	0.157111	0.875158	0.941457	11.8446	18.7393	16.9821	18.055	12.0306
350	Chr1:56155944-56156384	4.86072	0.226413	0.603628	0.375087	0.707596	0.848936	7.40285	0	6.79283	4.33321	5.77471
351	Chr1:57433618-57434450	40.8947	0.578696	0.353442	1.63731	0.101565	0.290443	39.9754	18.7393	55.0219	51.2763	39.4605
352	Chr1:57434409-57435290	44.2503	-0.508192	0.320934	-1.58348	0.113313	0.310087	45.8977	64.2492	43.4741	36.8323	30.7984
353	Chr1:57463466-57464165	47.5259	-0.676123	0.306986	-2.20246	0.0276329	0.128672	57.7422	66.9262	40.757	40.4433	31.7609
354	Chr1:57463928-57464622	35.4695	0.399754	0.353302	1.13148	0.257853	0.496984	31.092	26.7705	44.1534	39.7211	35.6107
355	Chr1:57832185-57832810	26.233	0.120694	0.386531	0.31225	0.754851	0.875596	25.1697	24.0934	33.2849	25.9993	22.6176
356	Chr1:58026221-58027047	36.2379	-0.701429	0.335507	-2.09065	0.0365592	0.154541	38.4948	58.8951	29.8884	27.4437	26.4674
357	Chr1:58052329-58053589	75.0141	-0.646527	0.264469	-2.44462	0.0145003	0.0841345	106.601	85.6655	59.0976	62.1094	61.5969
358	Chr1:58086644-58087137	15.4712	0.191803	0.466884	0.410816	0.681208	0.832443	10.364	18.7393	21.0578	10.833	16.3617
359	Chr1:58448820-58449277	12.4026	0.551759	0.499626	1.10434	0.269444	0.509849	11.8446	5.3541	18.3406	12.9996	13.4743
360	Chr1:58450039-58450441	21.3507	-2.28644	0.41327	-5.53255	3.16e-08	2.16e-06	32.5725	53.541	4.75498	8.66642	7.21838
361	Chr1:58450217-58451145	60.9057	-0.843946	0.299616	-2.81676	0.00485115	0.039339	68.1062	101.728	43.4741	55.6095	35.6107
362	Chr1:58479573-58480390	47.9061	0.0623702	0.313013	0.199257	0.842061	0.923777	42.9365	50.8639	51.6255	49.8319	44.2727
363	Chr1:58480169-58480722	43.5564	-0.962628	0.334265	-2.87983	0.00397886	0.034238	39.9754	88.3426	27.8506	33.2213	28.3923
364	Chr1:58480488-58480990	36.3219	-1.7127	0.347168	-4.93334	8.08e-07	3.41e-05	44.4171	85.6655	14.9442	18.7772	17.8053
365	Chr1:58501410-58502148	41.8549	0.297934	0.331108	0.899809	0.368222	0.602731	35.5337	37.4787	41.4362	49.1097	45.7164
366	Chr1:58501929-58502392	24.8789	-0.495039	0.375716	-1.31759	0.187641	0.414689	34.0531	26.7705	22.4163	19.4995	21.6551
367	Chr1:58502326-58503137	43.4037	-0.242029	0.318247	-0.760508	0.446951	0.670713	41.456	56.218	38.7191	39.7211	40.9042
368	Chr1:58560448-58561001	31.9448	1.11967	0.393698	2.84397	0.0044555	0.0371538	22.2085	10.7082	38.7191	47.6653	40.4229
369	Chr1:58560805-58561635	68.4824	-0.141637	0.282135	-0.502018	0.615655	0.793162	84.3925	58.8951	71.3247	68.6092	59.1907
370	Chr1:58561350-58561883	39.485	-0.974533	0.320734	-3.03845	0.00237799	0.0235201	53.3005	61.5721	30.5677	24.5549	27.4299
371	Chr1:58561874-58562343	29.8654	0.175995	0.370688	0.474779	0.634945	0.805615	23.6891	32.1246	28.5299	36.1101	28.8735
372	Chr1:58642542-58643029	34.1786	-0.616133	0.338606	-1.81961	0.0688177	0.229754	47.3782	40.1557	29.2092	23.8327	30.3172
373	Chr1:58643088-58643551	32.4655	-0.352091	0.35453	-0.99312	0.320651	0.559927	39.9754	34.8016	35.3227	29.6103	22.6176
374	Chr1:58643294-58644150	62.0195	0.268123	0.311605	0.860459	0.389536	0.621805	66.6256	40.1557	77.4382	74.3868	51.4911
375	Chr1:58643908-58644334	19.0499	0.727762	0.448054	1.62427	0.104318	0.295185	16.2863	8.03114	27.8506	23.8327	19.249
376	Chr1:58770050-58770887	35.9682	0.550772	0.359717	1.53112	0.125739	0.329462	34.0531	18.7393	38.7191	48.3875	39.9417
377	Chr1:58803314-58803816	8.13518	0.720782	0.56381	1.27841	0.201103	0.430994	2.96114	8.03114	10.1892	9.38862	10.1057
378	Chr1:58852061-58852688	13.7869	1.13724	0.511806	2.22201	0.0262827	0.124394	5.92228	8.03114	13.5857	20.2217	21.1739
379	Chr1:59029501-59030256	41.2106	0.365912	0.338966	1.0795	0.280367	0.521088	42.9365	24.0934	43.4741	51.2763	44.2727
380	Chr1:59030309-59031051	36.1382	-1.18211	0.332522	-3.55497	0.000378018	0.00559751	53.3005	58.8951	24.4542	18.055	25.9862
381	Chr1:59176093-59176706	21.7841	0.361476	0.425521	0.849491	0.395608	0.626836	28.1308	5.3541	25.1335	28.1659	22.1364
382	Chr1:59176882-59177524	29.7161	-0.46039	0.367676	-1.25216	0.210512	0.442785	48.8588	21.4164	29.2092	21.6661	27.4299
383	Chr1:59293310-59294205	51.6602	-0.884456	0.296601	-2.98198	0.00286395	0.0268542	84.3925	58.8951	38.7191	39.7211	36.5731
384	Chr1:59294369-59294680	11.3962	0.568438	0.508784	1.11725	0.263888	0.503653	10.364	5.3541	13.5857	13.7218	13.9555
385	Chr1:59313465-59313932	7.60963	0.83938	0.573452	1.46373	0.143267	0.355818	7.40285	0	10.1892	7.94422	12.5119
386	Chr1:59389756-59390213	4.93267	0.691293	0.612875	1.12795	0.259341	0.498652	2.96114	2.67705	7.47211	7.22202	4.33103
387	Chr1:59451686-59452164	8.47869	1.45261	0.585458	2.48115	0.0130958	0.078364	4.44171	0	8.83067	13.7218	15.3992
388	Chr1:59572801-59573411	15.6987	0.854016	0.478202	1.78589	0.0741174	0.240886	8.88342	10.7082	16.3028	20.9439	21.6551
389	Chr1:59641591-59642058	10.0177	0.143775	0.516212	0.27852	0.780613	0.890932	10.364	8.03114	8.83067	9.38862	13.4743
390	Chr1:59726534-59727650	74.9577	-0.53446	0.266636	-2.00445	0.0450215	0.176807	87.3536	99.0508	58.4183	69.3314	60.6344
391	Chr1:59727579-59728070	32.573	-0.605879	0.348218	-1.73994	0.0818696	0.255465	50.3394	32.1246	26.492	23.1105	30.7984
392	Chr1:59741674-59742298	62.589	-1.1163	0.276437	-4.03818	5.39e-05	0.00117637	99.1982	88.3426	38.0398	44.0543	43.3103
393	Chr1:59742917-59743467	35.5901	0.840625	0.374372	2.24543	0.0247408	0.119854	28.1308	16.0623	46.8705	51.2763	35.6107
394	Chr1:59743212-59743735	38.4778	0.906231	0.375355	2.41433	0.0157642	0.0891461	23.6891	24.0934	42.7948	64.276	37.5356
395	Chr1:59819226-59819857	29.2962	0.119302	0.371416	0.321208	0.748052	0.87199	32.5725	21.4164	33.2849	33.2213	25.9862
396	Chr1:59821082-59821664	23.5794	0.220446	0.398807	0.552765	0.580424	0.770783	25.1697	16.0623	28.5299	24.5549	23.58
397	Chr1:59969155-59969699	20.622	-0.747067	0.404368	-1.84749	0.0646761	0.221567	38.4948	16.0623	16.3028	15.8884	16.3617
398	Chr1:59969758-59970299	35.4978	-1.84527	0.336857	-5.4779	4.3e-08	2.83e-06	72.5479	56.218	13.5857	15.8884	19.249
399	Chr1:59970570-59971054	19.724	-0.268312	0.417312	-0.642953	0.520254	0.727635	16.2863	29.4475	16.3028	20.2217	16.3617
400	Chr1:60099322-60099807	18.8432	-0.293556	0.418553	-0.701359	0.483079	0.699273	19.2474	24.0934	17.6613	18.7772	14.4368
401	Chr1:60099564-60099943	17.9594	-0.814811	0.415513	-1.96097	0.0498821	0.189224	23.6891	26.7705	13.5857	12.2774	13.4743
402	Chr1:60100037-60100525	18.1577	-0.464716	0.427526	-1.08699	0.277042	0.517121	16.2863	29.4475	18.3406	12.2774	14.4368
403	Chr1:60153973-60154640	44.0579	0.582877	0.34121	1.70827	0.0875869	0.26578	39.9754	24.0934	57.0597	56.3317	42.8291
404	Chr1:60154440-60155132	58.0992	-0.134284	0.29537	-0.45463	0.649375	0.813529	63.6645	58.8951	65.8904	51.9985	50.0475
405	Chr1:60155055-60155718	40.9001	-1.24687	0.315033	-3.95789	7.56e-05	0.00153975	59.2228	69.6033	25.1335	24.5549	25.9862
406	Chr1:60236532-60237164	30.3334	0.664292	0.382025	1.73887	0.0820578	0.255758	23.6891	18.7393	38.7191	39.7211	30.7984
407	Chr1:60237340-60237849	28.5375	-1.05841	0.355645	-2.97602	0.00292013	0.0272018	39.9754	45.5098	20.3785	19.4995	17.3241
408	Chr1:60237660-60238482	49.3725	0.422139	0.315977	1.33598	0.181555	0.407545	38.4948	42.8328	54.3426	57.7761	53.416
409	Chr1:60399669-60400441	43.2702	-0.307966	0.3228	-0.954045	0.340061	0.577103	50.3394	48.1869	47.5498	31.7769	38.498
410	Chr1:60400323-60401206	46.5313	0.539179	0.325763	1.65513	0.0978982	0.284144	32.5725	40.1557	51.6255	53.4429	54.8597
411	Chr1:60465713-60466185	22.0615	0.599906	0.431071	1.39166	0.164024	0.385119	22.2085	8.03114	20.3785	34.6657	25.0237
412	Chr1:60466370-60467120	41.7601	-1.17312	0.321173	-3.65261	0.000259585	0.0041928	59.2228	69.6033	33.2849	21.6661	25.0237
413	Chr1:60466884-60467471	26.868	0.299473	0.388086	0.771667	0.440312	0.665769	26.6503	18.7393	36.002	27.4437	25.505
414	Chr1:60467239-60467634	13.1047	1.5567	0.536015	2.90421	0.00368175	0.032422	7.40285	0	21.0578	17.3328	19.7302
415	Chr1:60622609-60623424	59.1777	-0.258078	0.289624	-0.89108	0.372886	0.607276	65.1451	66.9262	62.494	49.8319	51.4911
416	Chr1:60623851-60624503	32.7398	0.327082	0.359399	0.910081	0.36278	0.597411	31.092	24.0934	38.7191	33.2213	36.5731
417	Chr1:60682830-60683344	8.64943	0.482135	0.545477	0.883878	0.376762	0.610243	7.40285	5.3541	8.83067	8.66642	12.9931
418	Chr1:61685230-61685615	14.075	-0.933087	0.462702	-2.0166	0.043737	0.173546	13.3251	29.4475	8.83067	7.22202	11.5494
419	Chr1:61717094-61717484	4.30087	0.960842	0.625082	1.53715	0.124258	0.32748	2.96114	0	7.47211	5.77761	5.29348
420	Chr1:62711731-62712104	4.8066	0.990413	0.621049	1.59474	0.11077	0.306007	1.48057	2.67705	5.43426	8.66642	5.77471
421	Chr1:62807250-62807647	5.36513	1.20277	0.617616	1.94744	0.0514818	0.192668	2.96114	0	10.8685	5.77761	7.21838
422	Chr1:62842206-62842669	16.3416	0.0862041	0.44674	0.192963	0.846988	0.926079	13.3251	18.7393	14.2649	16.6106	18.7678
423	Chr1:62931362-62932058	13.4181	1.54221	0.53213	2.89818	0.00375335	0.0328044	5.92228	2.67705	19.0199	21.6661	17.8053
424	Chr1:63161525-63162354	50.1171	1.41641	0.363758	3.89383	9.87e-05	0.00192073	34.0531	8.03114	63.8526	80.1644	64.4842
425	Chr1:63223467-63224094	61.664	-1.61403	0.28231	-5.71721	1.08e-08	8.61e-07	111.043	99.0508	33.9641	36.8323	27.4299
426	Chr1:63223889-63224466	51.2088	-0.330535	0.308947	-1.06988	0.284675	0.525664	60.7034	56.218	49.5876	53.4429	36.0919
427	Chr1:63224458-63224898	28.2976	0.546992	0.400773	1.36484	0.172303	0.396006	29.6114	10.7082	40.757	35.3879	25.0237
428	Chr1:63247519-63248024	23.1928	0.864419	0.424927	2.03428	0.0419239	0.168915	13.3251	16.0623	27.8506	33.2213	25.505
429	Chr1:63294276-63294859	19.2227	0.667695	0.449599	1.48509	0.13752	0.347247	7.40285	21.4164	24.4542	21.6661	21.1739
430	Chr1:63320299-63320805	19.0545	0.0114852	0.42136	0.0272573	0.978254	0.989525	19.2474	18.7393	19.0199	16.6106	21.6551
431	Chr1:63320550-63321095	17.4764	1.0078	0.470533	2.14182	0.0322077	0.142424	14.8057	2.67705	25.1335	23.1105	21.6551
432	Chr1:63356209-63356718	11.9768	-0.175328	0.48347	-0.362645	0.71687	0.854818	14.8057	10.7082	12.2271	12.9996	9.14328
433	Chr1:63492535-63493597	60.0158	-0.477351	0.285305	-1.67313	0.0943026	0.277672	82.9119	61.5721	51.6255	49.1097	54.8597
434	Chr1:63776814-63777271	24.02	0.207399	0.420094	0.493696	0.621521	0.796735	32.5725	8.03114	33.2849	27.4437	18.7678
435	Chr1:63777129-63778342	75.7332	0.502475	0.301185	1.66833	0.0952502	0.279467	75.5091	40.1557	88.986	103.275	70.7401
436	Chr1:63850788-63851235	5.61617	1.18607	0.614208	1.93105	0.0534767	0.196996	1.48057	2.67705	6.11354	8.66642	9.14328
437	Chr1:63905328-63905975	6.85519	1.80914	0.618495	2.92507	0.00344383	0.0307852	1.48057	0	14.2649	6.49982	12.0306
438	Chr1:64168232-64168995	71.2684	-2.44499	0.277152	-8.82184	1.13e-18	1.03e-15	137.693	147.238	27.8506	19.4995	24.0613
439	Chr1:64272919-64273385	14.1672	0.673481	0.485784	1.38638	0.165631	0.387415	8.88342	10.7082	15.6235	20.2217	15.3992
440	Chr1:64273159-64273642	13.1625	1.31718	0.526836	2.50018	0.0124131	0.0754295	7.40285	2.67705	16.9821	23.8327	14.918
441	Chr1:64578320-64579126	41.3725	0.000452812	0.334083	0.00135539	0.998919	0.999426	53.3005	26.7705	42.7948	45.4987	38.498
442	Chr1:64580050-64580778	29.568	0.255804	0.383988	0.666176	0.505299	0.716007	38.4948	10.7082	31.247	36.1101	31.2797
443	Chr1:64663289-64663894	34.4668	-0.456103	0.337925	-1.34972	0.177106	0.402136	38.4948	45.5098	30.5677	28.8881	28.8735
444	Chr1:64663771-64664284	35.3043	-0.838313	0.330672	-2.53518	0.0112389	0.0707561	47.3782	50.8639	25.8127	25.9993	26.4674
445	Chr1:64664335-64664844	19.5953	0.614475	0.434812	1.4132	0.157598	0.375727	14.8057	13.3852	23.0956	21.6661	25.0237
446	Chr1:64736450-64737294	48.2699	-0.148704	0.311333	-0.477636	0.632909	0.804235	42.9365	61.5721	47.5498	46.9431	42.3478
447	Chr1:64737892-64738557	26.0903	0.521367	0.394264	1.32238	0.186042	0.41327	25.1697	13.3852	31.247	30.3325	30.3172
448	Chr1:65002493-65003484	45.6623	-0.0274258	0.317129	-0.0864815	0.931084	0.968452	44.4171	48.1869	50.2669	45.4987	39.9417
449	Chr1:65128528-65128987	7.54403	0.443252	0.563687	0.786344	0.431666	0.658488	5.92228	5.3541	8.15139	11.5552	6.73716
450	Chr1:65156154-65156852	29.1924	-0.26128	0.363651	-0.718493	0.472454	0.691117	26.6503	40.1557	27.1713	24.5549	27.4299
451	Chr1:65224543-65224967	13.4087	0.0664595	0.474757	0.139987	0.888671	0.948189	14.8057	10.7082	16.9821	10.1108	14.4368
452	Chr1:65224982-65225794	41.7011	-0.46678	0.319356	-1.46163	0.143843	0.356488	45.8977	56.218	38.0398	31.7769	36.5731
453	Chr1:65225868-65226329	12.5603	1.30787	0.529323	2.47084	0.0134798	0.0798778	8.88342	0	19.0199	18.055	16.8429
454	Chr1:65232411-65233120	38.2565	0.338064	0.345248	0.979192	0.327485	0.56636	37.0142	26.7705	46.8705	44.0543	36.5731
455	Chr1:65233172-65234228	65.5374	-0.573135	0.276751	-2.07095	0.0383639	0.15975	72.5479	93.6967	54.3426	54.1651	52.9348
456	Chr1:65357557-65358389	20.5744	0.907472	0.440623	2.05952	0.0394445	0.16253	11.8446	13.3852	24.4542	25.2771	27.9111
457	Chr1:66221914-66222434	15.2453	0.190742	0.455442	0.418805	0.675359	0.828734	16.2863	10.7082	16.9821	15.8884	16.3617
458	Chr1:66222197-66222607	10.7792	0.377679	0.512762	0.736558	0.461391	0.681975	13.3251	2.67705	13.5857	12.2774	12.0306
459	Chr1:66368410-66368745	4.07721	0.911689	0.626522	1.45516	0.145625	0.358804	2.96114	0	6.11354	5.05541	6.25593
460	Chr1:66514315-66514793	13.6087	0.00705504	0.479835	0.0147031	0.988269	0.994044	7.40285	21.4164	11.5478	12.2774	15.3992
461	Chr1:66514747-66515359	18.7298	-0.126851	0.422474	-0.300256	0.763982	0.880264	25.1697	13.3852	15.6235	20.2217	19.249
462	Chr1:66747310-66747858	28.4978	-1.06152	0.355199	-2.98851	0.0028034	0.0264609	39.9754	45.5098	19.6992	19.4995	17.8053
463	Chr1:66747842-66748734	38.6898	1.31235	0.379721	3.45609	0.000548069	0.00749193	20.728	16.0623	57.739	55.6095	43.3103
464	Chr1:66862569-66863130	26.2875	0.128991	0.381989	0.337683	0.735602	0.865432	25.1697	24.0934	25.1335	31.0547	25.9862
465	Chr1:66863612-66864275	38.6575	-1.95192	0.350697	-5.56582	2.61e-08	1.84e-06	48.8588	96.3737	20.3785	12.2774	15.3992
466	Chr1:66909214-66909699	13.7752	-0.398192	0.459278	-0.866997	0.385944	0.61819	14.8057	18.7393	12.2271	10.1108	12.9931
467	Chr1:67084615-67085299	17.7194	0.0828497	0.431757	0.19189	0.847829	0.92665	17.7668	16.0623	16.9821	19.4995	18.2866
468	Chr1:69733322-69733920	23.9967	0.865976	0.422134	2.05142	0.0402256	0.16461	22.2085	5.3541	30.5677	31.0547	30.7984
469	Chr1:69733980-69734515	29.7721	-0.87792	0.370883	-2.36711	0.0179276	0.0971744	29.6114	56.218	27.1713	16.6106	19.249
470	Chr1:69734260-69734751	25.7232	-0.317574	0.384307	-0.826355	0.408603	0.638464	20.728	40.1557	25.1335	20.9439	21.6551
471	Chr1:69873440-69874021	17.5241	-0.421541	0.428226	-0.984389	0.324924	0.563738	25.1697	16.0623	16.3028	18.055	12.0306
472	Chr1:71132733-71133333	7.85076	0.862834	0.571368	1.51012	0.131013	0.337303	7.40285	0	10.1892	12.9996	8.66206
473	Chr1:71148534-71149165	37.3834	-0.283628	0.335392	-0.845661	0.397742	0.628405	41.456	42.8328	36.6813	37.5545	28.3923
474	Chr1:71148982-71149663	42.0155	-1.08959	0.312461	-3.48713	0.000488238	0.0068085	59.2228	66.9262	27.8506	29.6103	26.4674
475	Chr1:71296827-71297366	4.80724	1.86654	0.634202	2.94313	0.00324917	0.0294009	0	0	8.15139	8.66642	7.21838
476	Chr1:71604045-71604991	43.1467	0.690946	0.339944	2.03253	0.0420999	0.169332	35.5337	24.0934	55.0219	53.4429	47.6413
477	Chr1:72257607-72258038	24.5676	1.04436	0.431373	2.42102	0.0154769	0.0880069	17.7668	8.03114	29.8884	41.1655	25.9862
478	Chr1:72257842-72258995	76.212	-0.218516	0.271915	-0.803621	0.421616	0.649672	81.4313	85.6655	72.6832	80.1644	61.1156
479	Chr1:72282938-72283400	18.322	-0.34709	0.419688	-0.82702	0.408226	0.637979	19.2474	24.0934	16.9821	14.444	16.8429
480	Chr1:72290035-72290528	15.563	-0.499471	0.445273	-1.12172	0.261983	0.501217	26.6503	10.7082	14.9442	14.444	11.0682
481	Chr1:72330221-72330978	32.4702	-0.405863	0.361272	-1.12343	0.261255	0.500641	53.3005	21.4164	33.9641	26.7215	26.9486
482	Chr1:72353560-72353997	18.0785	1.02078	0.465718	2.19185	0.0283904	0.131064	13.3251	5.3541	23.0956	27.4437	21.1739
483	Chr1:72353970-72355105	71.3978	0.292462	0.289981	1.00855	0.313188	0.553494	51.8199	74.9573	82.1932	83.0532	64.9654
484	Chr1:72475119-72475590	6.01317	0.346578	0.584951	0.592489	0.553523	0.752752	4.44171	5.3541	6.79283	5.77761	7.69961
485	Chr1:72629708-72630574	45.5113	-0.162927	0.314765	-0.517616	0.604726	0.786744	51.8199	45.5098	45.5119	37.5545	47.1601
486	Chr1:72687660-72688177	11.1343	-0.310663	0.492072	-0.631337	0.52782	0.733593	10.364	16.0623	9.50996	10.1108	9.62451
487	Chr1:72758217-72759115	60.4418	0.325174	0.301692	1.07784	0.281107	0.521821	63.6645	37.4787	67.249	72.2202	61.5969
488	Chr1:72785895-72786378	10.8653	0.874735	0.535051	1.63486	0.102078	0.291226	8.88342	2.67705	8.83067	18.055	15.8804
489	Chr1:72852768-72853293	12.5194	-1.05052	0.483404	-2.17316	0.0297681	0.135255	29.6114	8.03114	8.83067	5.05541	11.0682
490	Chr1:74083173-74083865	20.8746	-0.295201	0.406068	-0.726975	0.467241	0.686329	23.6891	24.0934	22.4163	14.444	19.7302
491	Chr1:74083609-74083989	10.8917	-0.216072	0.502465	-0.430024	0.667178	0.823951	8.88342	16.0623	12.9064	7.94422	8.66206
492	Chr1:74144661-74145173	23.9456	-0.34983	0.385362	-0.907795	0.363987	0.598547	26.6503	29.4475	17.6613	23.8327	22.1364
493	Chr1:74144935-74145446	24.9312	-0.32678	0.379044	-0.862117	0.388623	0.620774	32.5725	24.0934	21.0578	25.2771	21.6551
494	Chr1:74171470-74171862	8.79669	0.240098	0.539797	0.444793	0.656469	0.81726	7.40285	8.03114	12.9064	6.49982	9.14328
495	Chr1:74283305-74283806	27.2124	-0.0865905	0.370826	-0.233507	0.815368	0.90838	29.6114	26.7705	26.492	25.2771	27.9111
496	Chr1:74283549-74284375	44.449	0.543961	0.333992	1.62866	0.103384	0.293576	39.9754	26.7705	45.5119	54.1651	55.8222
497	Chr1:74330888-74331350	23.4885	-0.957191	0.38545	-2.48331	0.0130169	0.078056	26.6503	42.8328	14.2649	17.3328	16.3617
498	Chr1:74331525-74332364	43.6034	0.0205514	0.32109	0.0640053	0.948966	0.976877	41.456	45.5098	40.0777	43.3321	47.6413
499	Chr1:74350113-74350633	26.1655	-0.241744	0.375257	-0.644208	0.51944	0.727131	35.5337	21.4164	23.0956	25.2771	25.505
500	Chr1:74350396-74351021	32.4268	-0.533346	0.342885	-1.55547	0.119835	0.320072	42.9365	37.4787	28.5299	26.7215	26.4674
501	Chr1:74444359-74445005	18.7878	0.271996	0.439178	0.619329	0.5357	0.739465	25.1697	5.3541	21.0578	18.7772	23.58
502	Chr1:74551538-74552183	40.7006	0.542838	0.340041	1.59639	0.110402	0.305507	32.5725	29.4475	50.2669	46.9431	44.2727
503	Chr1:74552805-74553357	39.6505	-1.39568	0.323668	-4.31206	1.62e-05	0.000435672	72.5479	56.218	27.8506	19.4995	22.1364
504	Chr1:74553201-74554150	74.5557	0.228454	0.274845	0.831211	0.405854	0.635898	69.5868	64.2492	84.9103	79.4422	74.59
505	Chr1:74633726-74634733	60.5327	-0.141052	0.284818	-0.495236	0.620433	0.796174	66.6256	61.5721	57.739	58.4984	58.2283
506	Chr1:74634878-74635424	26.4475	0.0795308	0.378959	0.209867	0.833772	0.918932	26.6503	24.0934	24.4542	28.1659	28.8735
507	Chr1:74647128-74647812	25.4864	0.507775	0.402151	1.26265	0.206715	0.438037	26.6503	10.7082	25.8127	33.9435	30.3172
508	Chr1:74647561-74648064	19.9421	-0.326152	0.413523	-0.788716	0.430278	0.657232	31.092	13.3852	21.0578	17.3328	16.8429
509	Chr1:74708565-74709625	52.238	0.67415	0.320276	2.1049	0.0353	0.151121	45.8977	26.7705	63.8526	63.5538	61.1156
510	Chr1:74759720-74760526	35.511	0.30875	0.348862	0.885022	0.376145	0.609893	29.6114	32.1246	37.3605	37.5545	40.9042
511	Chr1:74795121-74795640	14.7408	-0.194474	0.453438	-0.428888	0.668005	0.824529	20.728	10.7082	12.9064	12.9996	16.3617
512	Chr1:74830578-74831067	29.2768	-0.343982	0.358865	-0.958527	0.337797	0.575279	39.9754	26.7705	27.1713	25.9993	26.4674
513	Chr1:74830829-74831310	25.246	-0.564022	0.373418	-1.51043	0.130933	0.337167	29.6114	34.8016	19.6992	20.9439	21.1739
514	Chr1:74849719-74850213	23.3797	-0.263241	0.394237	-0.667723	0.504311	0.715254	19.2474	34.8016	22.4163	20.2217	20.2115
515	Chr1:74863470-74864336	48.8279	-0.0813253	0.314144	-0.258879	0.795729	0.898536	50.3394	50.8639	57.739	40.4433	44.754
516	Chr1:74871249-74871661	5.16602	0.852037	0.61034	1.396	0.162713	0.383187	4.44171	0	8.15139	6.49982	6.73716
517	Chr1:74901395-74901855	19.2776	-1.21674	0.406874	-2.99046	0.00278555	0.0263441	26.6503	34.8016	10.8685	12.9996	11.0682
518	Chr1:74939466-74940058	15.0072	0.784879	0.486153	1.61447	0.106426	0.298839	8.88342	10.7082	17.6613	13.7218	24.0613
519	Chr1:74939805-74940277	10.8133	1.14638	0.54802	2.09186	0.0364506	0.154183	2.96114	8.03114	11.5478	12.2774	19.249
520	Chr1:74946898-74947381	9.56518	-0.342306	0.518767	-0.659845	0.509353	0.718745	16.2863	5.3541	12.2271	5.77761	8.18083
521	Chr1:74947244-74947656	8.43672	-0.362384	0.528033	-0.686291	0.49253	0.706529	11.8446	8.03114	8.83067	5.77761	7.69961
522	Chr1:74981799-74982301	11.5199	0.284484	0.51636	0.550942	0.581674	0.771459	2.96114	18.7393	10.8685	12.9996	12.0306
523	Chr1:75062341-75062819	4.62319	1.83441	0.63453	2.89098	0.00384046	0.0332931	0	0	7.47211	7.94422	7.69961
524	Chr1:75121738-75122260	22.1913	0.135188	0.407706	0.331582	0.740205	0.867818	26.6503	13.3852	20.3785	27.4437	23.0988
525	Chr1:75138046-75138453	12.399	0.0473298	0.49134	0.096328	0.92326	0.965204	13.3251	10.7082	16.3028	7.22202	14.4368
526	Chr1:75164763-75165267	20.0905	0.246216	0.419842	0.58645	0.557573	0.755571	19.2474	16.0623	20.3785	20.2217	24.5425
527	Chr1:75165092-75165669	34.2657	-0.472181	0.338934	-1.39314	0.163579	0.384408	38.4948	45.5098	31.247	28.1659	27.9111
528	Chr1:75165499-75166142	28.371	0.253042	0.374527	0.675632	0.499275	0.71146	28.1308	21.4164	28.5299	31.0547	32.7233
529	Chr1:75176207-75177079	38.4489	-0.289572	0.335161	-0.86398	0.387599	0.619641	39.9754	48.1869	32.6056	29.6103	41.8666
530	Chr1:75188024-75188664	32.2407	-0.53786	0.350843	-1.53305	0.125264	0.328645	38.4948	42.8328	27.1713	20.9439	31.7609
531	Chr1:75188629-75189099	20.5055	0.104393	0.420235	0.248417	0.803812	0.902878	26.6503	10.7082	23.7749	17.3328	24.0613
532	Chr1:75188924-75189595	36.0562	0.115358	0.35176	0.327946	0.742952	0.869091	44.4171	21.4164	40.0777	41.1655	33.2046
533	Chr1:75205538-75206167	22.5077	0.759885	0.427113	1.77912	0.0752197	0.242917	22.2085	5.3541	26.492	29.6103	28.8735
534	Chr1:75207229-75207813	46.1815	-0.999138	0.305456	-3.27097	0.00107178	0.012776	76.9896	56.218	34.6434	31.7769	31.2797
535	Chr1:75215408-75215919	37.0532	-1.00176	0.330897	-3.02742	0.00246647	0.0241439	62.1839	45.5098	21.737	25.9993	29.836
536	Chr1:75215852-75216339	23.975	-0.710042	0.384078	-1.84869	0.0645024	0.221335	41.456	21.4164	19.6992	16.6106	20.6927
537	Chr1:75232917-75233670	32.0284	-0.233376	0.3534	-0.660375	0.509013	0.718424	34.0531	37.4787	29.8884	24.5549	34.167
538	Chr1:75259718-75260390	21.0662	0.194628	0.412489	0.471837	0.637043	0.806583	23.6891	13.3852	24.4542	21.6661	22.1364
539	Chr1:75313212-75313713	26.0223	-0.18746	0.377232	-0.496936	0.619234	0.795498	34.0531	21.4164	22.4163	25.2771	26.9486
540	Chr1:75313519-75314048	30.3198	-0.853062	0.347823	-2.45257	0.0141839	0.082824	44.4171	40.1557	21.0578	22.3883	23.58
541	Chr1:75314532-75315024	13.8487	1.22871	0.511152	2.4038	0.0162256	0.0907735	8.88342	2.67705	20.3785	19.4995	17.8053
542	Chr1:75342132-75342620	17.3911	0.662782	0.461661	1.43565	0.151103	0.365784	19.2474	2.67705	18.3406	23.1105	23.58
543	Chr1:75357002-75357437	9.06437	0.366992	0.534105	0.687115	0.49201	0.706136	8.88342	5.3541	10.8685	8.66642	11.5494
544	Chr1:75371749-75372215	11.3292	0.0507313	0.495158	0.102455	0.918396	0.962152	13.3251	8.03114	12.9064	12.2774	10.1057
545	Chr1:75432447-75433180	30.3218	0.547022	0.381364	1.43438	0.151463	0.36635	22.2085	24.0934	28.5299	42.6099	34.167
546	Chr1:75475671-75476029	20.6334	-0.862509	0.397416	-2.17029	0.0299846	0.135806	26.6503	32.1246	13.5857	15.8884	14.918
547	Chr1:75475779-75476220	24.96	-1.34255	0.372348	-3.60564	0.00031139	0.00484034	38.4948	42.8328	12.9064	16.6106	13.9555
548	Chr1:75517658-75518143	24.9226	0.11423	0.397864	0.287108	0.774029	0.887054	34.0531	10.7082	23.7749	28.1659	27.9111
549	Chr1:75517982-75518700	51.3874	-0.041405	0.311174	-0.13306	0.894146	0.951218	57.7422	45.5098	59.0976	52.7207	41.8666
550	Chr1:75518446-75518921	25.8263	0.757006	0.40795	1.85563	0.0635059	0.219308	22.2085	10.7082	35.3227	33.9435	26.9486
551	Chr1:75542652-75543573	36.7563	-1.03503	0.335249	-3.08736	0.0020194	0.0208256	57.7422	50.8639	29.2092	18.055	27.9111
552	Chr1:75556255-75556722	9.50447	0.610476	0.537334	1.13612	0.255906	0.494982	7.40285	5.3541	13.5857	11.5552	9.62451
553	Chr1:78185798-78186616	18.8511	0.538789	0.437617	1.23119	0.218252	0.452621	14.8057	13.3852	21.0578	23.8327	21.1739
554	Chr1:78306767-78307172	13.0585	-0.223301	0.469107	-0.476012	0.634065	0.804978	17.7668	10.7082	11.5478	10.833	14.4368
555	Chr1:78307138-78307621	15.1163	0.203119	0.460237	0.441336	0.65897	0.818861	11.8446	16.0623	14.9442	14.444	18.2866
556	Chr1:78484540-78485557	74.3772	-0.17832	0.269882	-0.660733	0.508784	0.718219	79.9508	80.3114	75.4004	72.2202	64.003
557	Chr1:78485690-78486503	47.2613	0.348862	0.3206	1.08815	0.276528	0.516539	39.9754	40.1557	57.739	51.2763	47.1601
558	Chr1:78508164-78508828	11.0286	1.03785	0.534263	1.94258	0.0520664	0.193892	5.92228	5.3541	14.2649	12.2774	17.3241
559	Chr1:78654320-78654885	30.6929	-1.47142	0.349141	-4.21441	2.5e-05	0.000630184	44.4171	58.8951	17.6613	16.6106	15.8804
560	Chr1:78655083-78655620	20.1164	0.243964	0.420453	0.580243	0.561751	0.758222	19.2474	16.0623	18.3406	23.8327	23.0988
561	Chr1:79667978-79668489	16.1243	-0.261084	0.437939	-0.596167	0.551064	0.750923	22.2085	13.3852	14.9442	13.7218	16.3617
562	Chr1:79757932-79758404	19.1362	-0.876561	0.414647	-2.11399	0.034516	0.14883	28.1308	26.7705	13.5857	9.38862	17.8053
563	Chr1:79772550-79773320	35.172	-0.323033	0.339573	-0.951292	0.341456	0.578549	47.3782	32.1246	29.2092	33.9435	33.2046
564	Chr1:79773220-79773721	13.7662	0.590635	0.491687	1.20124	0.229658	0.465623	7.40285	13.3852	12.9064	14.444	20.6927
565	Chr1:79854354-79854867	14.833	0.355764	0.469708	0.757414	0.448802	0.671904	17.7668	5.3541	14.9442	15.8884	20.2115
566	Chr1:80335775-80336574	43.3495	0.283618	0.326293	0.869213	0.384731	0.617406	38.4948	37.4787	46.1912	44.0543	50.5287
567	Chr1:80337647-80338254	26.6237	0.218368	0.381465	0.572447	0.567019	0.761427	28.1308	18.7393	29.2092	28.1659	28.8735
568	Chr1:82313104-82313658	30.6829	-0.400544	0.351075	-1.14091	0.253908	0.492793	35.5337	37.4787	26.492	25.9993	27.9111
569	Chr1:82313816-82314314	14.5006	1.85506	0.538908	3.44225	0.000576895	0.00781508	4.44171	2.67705	20.3785	22.3883	22.6176
570	Chr1:82583363-82583835	10.7717	-0.0329638	0.503431	-0.0654783	0.947793	0.976565	13.3251	8.03114	7.47211	12.9996	12.0306
571	Chr1:82699422-82699894	3.58846	1.16233	0.634131	1.83295	0.0668102	0.225878	1.48057	0	6.11354	3.61101	6.73716
572	Chr1:82721335-82722410	65.2006	-0.241166	0.281162	-0.857748	0.391032	0.623223	69.5868	74.9573	65.2111	62.8316	53.416
573	Chr1:82835936-82836445	26.3916	-1.57033	0.382869	-4.10147	4.11e-05	0.000940433	31.092	61.5721	14.2649	10.1108	14.918
574	Chr1:82836794-82837443	28.8196	0.756231	0.396691	1.90635	0.056605	0.203764	28.1308	8.03114	32.6056	36.8323	38.498
575	Chr1:83034405-83034821	9.87299	0.432151	0.525831	0.821845	0.411165	0.640917	7.40285	8.03114	11.5478	12.2774	10.1057
576	Chr1:83034735-83035274	12.8783	0.722682	0.499547	1.44667	0.147988	0.361703	8.88342	8.03114	14.2649	14.444	18.7678
577	Chr1:83156201-83156700	9.07431	0.548451	0.539714	1.01619	0.309539	0.54997	7.40285	5.3541	9.50996	11.5552	11.5494
578	Chr1:83404431-83404867	8.01773	0.775594	0.565216	1.37221	0.169998	0.392682	4.44171	5.3541	8.15139	10.1108	12.0306
579	Chr1:84280604-84281540	46.5786	-0.512216	0.308601	-1.6598	0.0969549	0.282688	51.8199	64.2492	36.6813	36.8323	43.3103
580	Chr1:84401493-84401907	6.26967	0.17559	0.575977	0.304856	0.760476	0.879072	5.92228	5.3541	6.11354	5.77761	8.18083
581	Chr1:84447949-84448417	6.19737	0.375955	0.583384	0.644439	0.519291	0.727002	4.44171	5.3541	7.47211	7.94422	5.77471
582	Chr1:84691885-84692550	24.5307	-0.662354	0.38471	-1.7217	0.0851241	0.261685	28.1308	37.4787	19.0199	14.444	23.58
583	Chr1:84692516-84693024	14.3078	0.217623	0.470076	0.462953	0.643398	0.809684	10.364	16.0623	13.5857	13.7218	17.8053
584	Chr1:84834468-84835042	33.435	0.737623	0.370067	1.99321	0.046238	0.179954	22.2085	24.0934	37.3605	39.7211	43.7915
585	Chr1:84845137-84845465	16.9455	1.10049	0.480626	2.28971	0.0220382	0.111023	7.40285	10.7082	23.7749	24.5549	18.2866
586	Chr1:84865950-84866402	20.838	0.432288	0.420997	1.02682	0.304505	0.544843	19.2474	13.3852	21.737	26.7215	23.0988
587	Chr1:84930776-84931938	64.8451	-0.415521	0.291002	-1.4279	0.153321	0.369142	57.7422	99.0508	50.9462	59.2206	57.2658
588	Chr1:87599924-87600383	6.65356	0.16963	0.571653	0.296737	0.766668	0.881788	4.44171	8.03114	6.11354	7.94422	6.73716
589	Chr1:87690563-87691039	27.9777	-0.186433	0.387699	-0.48087	0.630609	0.802738	17.7668	45.5098	21.737	30.3325	24.5425
590	Chr1:87691009-87691619	31.3631	0.417269	0.375098	1.11243	0.265955	0.506013	26.6503	24.0934	27.8506	44.0543	34.167
591	Chr1:87791059-87791533	23.7467	-0.722809	0.38041	-1.90008	0.0574231	0.205649	34.0531	29.4475	21.0578	15.8884	18.2866
592	Chr1:87791285-87791717	21.3623	-0.787583	0.393669	-2.00062	0.0454331	0.177851	34.0531	24.0934	18.3406	14.444	15.8804
593	Chr1:87914867-87915394	15.1344	0.87751	0.485271	1.80829	0.0705613	0.233627	11.8446	5.3541	23.0956	15.1662	20.2115
594	Chr1:87942251-87942745	13.0164	-0.29834	0.472286	-0.631694	0.527587	0.733445	11.8446	18.7393	10.1892	13.7218	10.587
595	Chr1:87960870-87961320	25.6663	-0.867742	0.370869	-2.33975	0.0192964	0.101984	32.5725	40.1557	19.0199	20.2217	16.3617
596	Chr1:87961101-87962348	78.6246	-0.358523	0.273968	-1.30863	0.190659	0.41859	93.2759	88.3426	65.8904	85.942	59.672
597	Chr1:88050666-88051267	19.6655	0.112524	0.429493	0.261992	0.793327	0.897327	16.2863	21.4164	27.1713	16.6106	16.8429
598	Chr1:88199954-88200441	32.6436	-0.144297	0.350279	-0.411949	0.680377	0.831745	37.0142	32.1246	27.1713	34.6657	32.2421
599	Chr1:88255509-88256083	48.0754	-2.0805	0.306153	-6.7956	1.08e-11	1.79e-09	90.3148	91.0196	21.737	20.9439	16.3617
600	Chr1:88256338-88256972	53.1955	-0.67437	0.300647	-2.24306	0.0248929	0.120317	85.873	50.8639	42.1155	46.2209	40.9042
601	Chr1:88331064-88331721	20.0805	-0.387045	0.411871	-0.939724	0.347359	0.583895	19.2474	29.4475	19.6992	13.7218	18.2866
602	Chr1:88339134-88339595	29.5709	-0.092967	0.376333	-0.247034	0.804882	0.903337	42.9365	16.0623	29.8884	33.9435	25.0237
603	Chr1:88339455-88339892	22.306	-0.0440161	0.399416	-0.110201	0.91225	0.95921	28.1308	16.0623	23.7749	22.3883	21.1739
604	Chr1:88368490-88369030	24.9021	-0.0922016	0.384735	-0.23965	0.810602	0.906223	29.6114	21.4164	21.737	28.1659	23.58
605	Chr1:88369009-88369493	25.0377	-0.0742687	0.382818	-0.194006	0.846172	0.925629	29.6114	21.4164	22.4163	25.2771	26.4674
606	Chr1:88383400-88384060	41.6629	-0.290892	0.33348	-0.872292	0.383049	0.615818	62.1839	29.4475	42.7948	39.7211	34.167
607	Chr1:88384424-88385565	70.8819	0.134028	0.280507	0.477807	0.632788	0.804233	75.5091	56.218	67.9283	80.1644	74.59
608	Chr1:88425300-88425840	37.8584	0.152372	0.338316	0.450385	0.652433	0.815078	39.9754	29.4475	38.0398	41.8877	39.9417
609	Chr1:88478731-88479225	39.973	-0.59387	0.321126	-1.84934	0.0644092	0.221116	53.3005	48.1869	35.3227	28.8881	34.167
610	Chr1:88479053-88479526	36.0056	-0.346372	0.33471	-1.03484	0.300743	0.541896	42.9365	40.1557	35.3227	31.7769	29.836
611	Chr1:88479396-88479906	28.4448	0.68873	0.392374	1.75529	0.0792096	0.250291	20.728	18.7393	34.6434	39.7211	28.3923
612	Chr1:88483613-88484270	36.9274	0.0768148	0.341814	0.224727	0.822192	0.912134	34.0531	37.4787	34.6434	43.3321	35.1295
613	Chr1:88566466-88567001	26.344	-0.0281532	0.380731	-0.0739451	0.941054	0.973115	22.2085	32.1246	28.5299	25.2771	23.58
614	Chr1:88566802-88567275	27.6837	-0.463581	0.371608	-1.2475	0.212214	0.445268	32.5725	34.8016	29.8884	22.3883	18.7678
615	Chr1:88567067-88567524	25.8667	-0.736806	0.369317	-1.99505	0.0460371	0.179503	32.5725	37.4787	21.737	18.7772	18.7678
616	Chr1:88599824-88600468	27.7507	-0.2866	0.371717	-0.771018	0.440696	0.666112	26.6503	37.4787	26.492	20.2217	27.9111
617	Chr1:88600252-88601011	47.214	-0.583221	0.304987	-1.91228	0.0558403	0.202128	60.7034	58.8951	34.6434	38.9989	42.8291
618	Chr1:89023895-89024345	5.40791	1.22331	0.615875	1.98629	0.047001	0.181987	2.96114	0	7.47211	7.94422	8.66206
619	Chr1:89072417-89072910	7.75804	0.0247803	0.546308	0.0453596	0.963821	0.98289	7.40285	8.03114	7.47211	7.22202	8.66206
620	Chr1:89082973-89083517	22.49	-0.0448647	0.398788	-0.112503	0.910425	0.958505	22.2085	24.0934	19.6992	20.9439	25.505
621	Chr1:89083384-89083886	22.6248	-0.447516	0.391273	-1.14375	0.252729	0.491655	28.1308	26.7705	15.6235	20.9439	21.6551
622	Chr1:89110051-89110512	21.068	0.162124	0.410554	0.39489	0.692924	0.840029	22.2085	16.0623	20.3785	23.1105	23.58
623	Chr1:89111137-89111688	32.2231	0.206706	0.361039	0.572531	0.566962	0.761427	31.092	26.7705	30.5677	40.4433	32.2421
624	Chr1:89111431-89111788	22.1405	0.471286	0.41649	1.13157	0.257817	0.496952	16.2863	18.7393	25.1335	28.8881	21.6551
625	Chr1:89160899-89161864	34.3087	0.48974	0.364079	1.34515	0.178578	0.403727	25.1697	29.4475	31.247	41.8877	43.7915
626	Chr1:89178411-89178883	9.25024	0.23331	0.52953	0.440599	0.659503	0.819286	10.364	5.3541	8.15139	9.38862	12.9931
627	Chr1:89223483-89224017	38.9001	-1.50588	0.334345	-4.50397	6.67e-06	0.000205601	63.6645	66.9262	28.5299	19.4995	15.8804
628	Chr1:89223834-89224960	77.0916	-0.602454	0.26962	-2.23445	0.0254532	0.121892	91.7953	104.405	71.3247	64.9982	52.9348
629	Chr1:89371741-89372397	17.8199	-0.0758119	0.432627	-0.175236	0.860894	0.934137	16.2863	21.4164	16.9821	13.7218	20.6927
630	Chr1:89406803-89407298	22.1163	-1.10215	0.39194	-2.81203	0.00492296	0.0396577	28.1308	40.1557	16.3028	11.5552	14.4368
631	Chr1:89572675-89573130	14.9822	0.861254	0.488521	1.76298	0.0779035	0.24803	5.92228	13.3852	19.0199	20.2217	16.3617
632	Chr1:89651928-89652576	28.2628	0.937853	0.402057	2.33263	0.0196674	0.103154	17.7668	16.0623	36.002	41.1655	30.3172
633	Chr1:89652629-89653482	54.1077	-0.317665	0.301624	-1.05318	0.292257	0.533929	62.1839	61.5721	38.7191	55.6095	52.4536
634	Chr1:89653365-89653741	19.2448	0.920861	0.467334	1.97045	0.0487863	0.186559	11.8446	10.7082	14.9442	34.6657	24.0613
635	Chr1:89749367-89749832	15.2583	0.0490515	0.455021	0.1078	0.914154	0.959828	11.8446	18.7393	15.6235	15.1662	14.918
636	Chr1:89749871-89750282	21.0025	-1.75184	0.402225	-4.35536	1.33e-05	0.000365149	31.092	45.5098	7.47211	10.833	10.1057
637	Chr1:89750248-89750551	11.5241	-0.646316	0.481873	-1.34126	0.179837	0.405143	14.8057	16.0623	10.8685	7.22202	8.66206
638	Chr1:89750326-89750940	19.246	0.614636	0.438194	1.40266	0.160719	0.380091	16.2863	10.7082	20.3785	25.2771	23.58
639	Chr1:89904495-89904828	9.49042	0.741146	0.544516	1.36111	0.173479	0.397507	4.44171	8.03114	10.1892	13.7218	11.0682
640	Chr1:90172813-90174153	108.395	0.373178	0.259676	1.43709	0.150693	0.365317	109.562	69.6033	116.837	131.441	114.532
641	Chr1:90505188-90505620	9.37061	0.306974	0.528857	0.580448	0.561613	0.75812	11.8446	2.67705	10.1892	11.5552	10.587
642	Chr1:90597697-90598200	15.2352	0.753902	0.482042	1.56398	0.117823	0.317481	7.40285	13.3852	22.4163	15.1662	17.8053
643	Chr1:90736617-90737072	4.83029	1.09598	0.620455	1.76642	0.0773258	0.246774	2.96114	0	7.47211	6.49982	7.21838
644	Chr1:90966860-90967367	34.5327	-1.56907	0.336005	-4.66978	3.02e-06	0.00010452	51.8199	66.9262	19.0199	16.6106	18.2866
645	Chr1:90967093-90967594	38.7795	-0.921135	0.34218	-2.69196	0.00710333	0.0517033	35.5337	77.6344	25.1335	28.1659	27.4299
646	Chr1:90967426-90967998	32.8361	-0.0525211	0.362346	-0.144947	0.884753	0.946614	28.1308	40.1557	25.1335	40.4433	30.3172
647	Chr1:91350899-91351347	26.3627	-1.13209	0.36315	-3.11743	0.00182435	0.0192164	42.9365	37.4787	16.9821	16.6106	17.8053
648	Chr1:91351230-91351806	35.3434	-1.393	0.337406	-4.12854	3.65e-05	0.000854055	47.3782	69.6033	18.3406	18.7772	22.6176
649	Chr1:91543284-91543863	8.02511	0.557689	0.556432	1.00226	0.316218	0.555896	5.92228	5.3541	8.15139	10.1108	10.587
650	Chr1:91864486-91864986	16.6939	0.230813	0.447613	0.515652	0.606097	0.787683	11.8446	18.7393	16.3028	18.7772	17.8053
651	Chr1:92499560-92500041	19.0834	-0.0406911	0.434611	-0.0936266	0.925406	0.966295	31.092	5.3541	19.0199	18.7772	21.1739
652	Chr1:92499943-92500616	33.2969	-0.0530625	0.351173	-0.151101	0.879896	0.943635	39.9754	26.7705	36.6813	33.2213	29.836
653	Chr1:92500370-92500962	21.4737	0.934079	0.435908	2.14283	0.0321264	0.14221	16.2863	8.03114	26.492	29.6103	26.9486
654	Chr1:92824865-92825239	5.05335	0.272542	0.600571	0.453805	0.649969	0.813955	7.40285	0	6.79283	5.77761	5.29348
655	Chr1:92949262-92949738	13.0096	0.682049	0.500801	1.36192	0.173224	0.397295	7.40285	10.7082	19.0199	11.5552	16.3617
656	Chr1:93076466-93076963	12.7838	-0.315807	0.476789	-0.662363	0.507738	0.717653	11.8446	18.7393	9.50996	9.38862	14.4368
657	Chr1:93146026-93146762	36.1593	-0.00294089	0.352162	-0.00835098	0.993337	0.996359	41.456	29.4475	36.002	45.4987	28.3923
658	Chr1:93147358-93147828	25.0411	-0.735895	0.37773	-1.9482	0.0513908	0.192439	28.1308	40.1557	21.0578	19.4995	16.3617
659	Chr1:93194432-93194888	17.8706	-0.233098	0.441362	-0.528134	0.597406	0.781655	29.6114	8.03114	19.6992	19.4995	12.5119
660	Chr1:93194768-93195394	29.3471	-0.984531	0.35178	-2.79871	0.0051307	0.0408819	42.9365	42.8328	21.737	18.055	21.1739
661	Chr1:93262904-93263435	18.3674	-0.286305	0.424158	-0.674995	0.499679	0.711721	25.1697	16.0623	14.2649	15.1662	21.1739
662	Chr1:93294412-93295210	43.756	-0.278586	0.319847	-0.870999	0.383755	0.61651	59.2228	37.4787	37.3605	44.7765	39.9417
663	Chr1:93294960-93295452	27.9186	-1.45393	0.385866	-3.76798	0.000164576	0.00292166	60.7034	32.1246	21.737	8.66642	16.3617
664	Chr1:93295417-93295892	15.2167	0.433134	0.471363	0.918896	0.35815	0.593698	19.2474	2.67705	19.0199	18.7772	16.3617
665	Chr1:93309383-93309964	31.4308	-1.76648	0.357479	-4.94148	7.75e-07	3.29e-05	62.1839	50.8639	14.2649	10.1108	19.7302
666	Chr1:93309852-93310355	20.3896	-0.353926	0.404356	-0.875283	0.38142	0.614515	28.1308	18.7393	19.6992	16.6106	18.7678
667	Chr1:93355515-93355994	18.6769	-0.558243	0.414037	-1.34829	0.177564	0.402501	28.1308	18.7393	14.2649	14.444	17.8053
668	Chr1:93356000-93356457	13.7697	-0.354734	0.459185	-0.772531	0.4398	0.665392	20.728	10.7082	13.5857	12.2774	11.5494
669	Chr1:93391100-93392097	37.3987	-0.193356	0.351515	-0.550065	0.582275	0.771817	32.5725	50.8639	33.2849	25.9993	44.2727
670	Chr1:93436421-93436855	14.6927	0.428927	0.470264	0.912098	0.361717	0.596505	10.364	13.3852	16.9821	17.3328	15.3992
671	Chr1:93437163-93437634	21.7117	-0.724153	0.407672	-1.77631	0.0756811	0.243864	17.7668	42.8328	14.2649	15.8884	17.8053
672	Chr1:93653867-93654353	7.07758	0.584103	0.57373	1.01808	0.30864	0.54893	4.44171	5.3541	10.1892	7.22202	8.18083
673	Chr1:94075763-94076333	28.1249	0.623717	0.389636	1.60077	0.109428	0.303924	17.7668	24.0934	29.2092	35.3879	34.167
674	Chr1:94077699-94078199	26.549	0.413573	0.3967	1.04253	0.297164	0.538744	23.6891	18.7393	25.8127	38.9989	25.505
675	Chr1:94244790-94245136	7.96694	0.476667	0.557376	0.855198	0.392441	0.624265	4.44171	8.03114	8.83067	7.94422	10.587
676	Chr1:94369337-94370047	37.3321	0.363777	0.351226	1.03574	0.300326	0.541571	26.6503	37.4787	33.9641	43.3321	45.2352
677	Chr1:94369840-94370455	42.2114	-0.62994	0.315738	-1.99513	0.0460282	0.179503	62.1839	45.5098	32.6056	34.6657	36.0919
678	Chr1:94370397-94371159	36.6057	0.213183	0.343337	0.620916	0.534655	0.738858	34.0531	32.1246	40.0777	35.3879	41.3854
679	Chr1:94537675-94538638	48.6684	0.078833	0.312494	0.25227	0.800832	0.901404	54.7811	37.4787	46.8705	52.7207	51.4911
680	Chr1:94595571-94596043	7.61356	0.105623	0.555448	0.190158	0.849186	0.927461	4.44171	10.7082	6.79283	7.94422	8.18083
681	Chr1:94728404-94729077	37.0639	-0.554166	0.335041	-1.65403	0.0981224	0.284506	47.3782	45.5098	38.0398	25.9993	28.3923
682	Chr1:94728934-94729406	19.4542	-0.123054	0.414635	-0.296776	0.766638	0.881788	22.2085	18.7393	19.0199	16.6106	20.6927
683	Chr1:94751388-94751850	4.79517	0.382628	0.611198	0.62603	0.531295	0.736273	4.44171	2.67705	7.47211	2.16661	7.21838
684	Chr1:94803465-94804095	37.8919	-1.3729	0.337661	-4.06592	4.78e-05	0.00106759	47.3782	77.6344	23.7749	16.6106	24.0613
685	Chr1:94815289-94815658	15.5978	0.325461	0.464184	0.701148	0.483211	0.699345	8.88342	18.7393	14.2649	18.7772	17.3241
686	Chr1:94815483-94815986	25.5735	0.0128655	0.401763	0.0320226	0.974454	0.987874	13.3251	40.1557	26.492	25.2771	22.6176
687	Chr1:94830350-94830947	22.488	0.580951	0.41668	1.39424	0.163245	0.383923	19.2474	13.3852	24.4542	24.5549	30.7984
688	Chr1:94830832-94831350	32.9875	-0.341474	0.363986	-0.938152	0.348166	0.584544	54.7811	18.7393	31.247	33.2213	26.9486
689	Chr1:94831148-94831886	47.8455	-0.374223	0.304971	-1.22708	0.219793	0.454398	53.3005	58.8951	42.7948	44.7765	39.4605
690	Chr1:95011793-95012372	8.92972	0.530616	0.54208	0.978853	0.327653	0.56636	7.40285	5.3541	9.50996	9.38862	12.9931
691	Chr1:95073208-95073760	10.9455	0.614852	0.519179	1.18428	0.236303	0.473066	7.40285	8.03114	14.2649	10.1108	14.918
692	Chr1:95124239-95124568	12.1518	-0.0566668	0.483043	-0.117312	0.906613	0.956856	11.8446	13.3852	12.9064	10.1108	12.5119
693	Chr1:95124330-95124771	12.2422	0.149067	0.48553	0.30702	0.758828	0.878264	11.8446	10.7082	12.9064	12.2774	13.4743
694	Chr1:95132231-95132806	30.298	-1.17427	0.359072	-3.27029	0.00107439	0.0127952	53.3005	40.1557	22.4163	12.9996	22.6176
695	Chr1:95132865-95133337	18.1747	-0.174683	0.431512	-0.404817	0.685612	0.835318	16.2863	24.0934	12.2271	18.055	20.2115
696	Chr1:95201597-95202595	49.4745	-0.0907771	0.312613	-0.290382	0.771524	0.885292	51.8199	50.8639	41.4362	58.4984	44.754
697	Chr1:95238700-95239446	43.5965	0.565883	0.337077	1.6788	0.0931918	0.275669	39.9754	24.0934	51.6255	55.6095	46.6789
698	Chr1:95239727-95240194	26.3029	-0.306319	0.377593	-0.811243	0.417226	0.645962	28.1308	32.1246	26.492	25.9993	18.7678
699	Chr1:95240439-95241040	33.5212	0.565654	0.367562	1.53894	0.12382	0.326687	28.1308	21.4164	40.0777	44.7765	33.2046
700	Chr1:95297709-95298181	7.60603	0.323296	0.565831	0.571366	0.567752	0.761889	2.96114	10.7082	6.79283	6.49982	11.0682
701	Chr1:95341397-95341868	11.7358	-0.132643	0.485478	-0.273222	0.784683	0.892475	11.8446	13.3852	11.5478	10.833	11.0682
702	Chr1:95341895-95342352	26.6275	-1.32136	0.37004	-3.57085	0.000355824	0.00534956	38.4948	48.1869	19.0199	11.5552	15.8804
703	Chr1:95374422-95374957	32.1929	-0.384554	0.350425	-1.0974	0.272469	0.512657	47.3782	26.7705	27.8506	29.6103	29.3548
704	Chr1:95374969-95375506	36.5144	-0.500566	0.331873	-1.50831	0.131476	0.337775	44.4171	45.5098	34.6434	28.1659	29.836
705	Chr1:95375912-95376690	45.6136	0.633239	0.331875	1.90806	0.0563828	0.203231	38.4948	26.7705	55.7012	57.0539	50.0475
706	Chr1:95408095-95408644	30.1809	-0.874011	0.349355	-2.50179	0.0123568	0.0752604	44.4171	40.1557	24.4542	21.6661	20.2115
707	Chr1:95531205-95531679	15.8296	-0.19785	0.448485	-0.441152	0.659103	0.818948	25.1697	8.03114	15.6235	12.9996	17.3241
708	Chr1:95531900-95532394	23.9177	-0.872151	0.377969	-2.30747	0.0210287	0.107604	39.9754	26.7705	16.9821	18.055	17.8053
709	Chr1:95545423-95545917	5.09342	1.14985	0.61908	1.85736	0.0632603	0.218646	2.96114	0	9.50996	5.77761	7.21838
710	Chr1:95564469-95564940	9.85515	0.11768	0.524041	0.224564	0.822319	0.912173	5.92228	13.3852	9.50996	12.2774	8.18083
711	Chr1:95581958-95582479	28.6085	-0.865628	0.359951	-2.40485	0.0161791	0.0906593	35.5337	45.5098	24.4542	18.7772	18.7678
712	Chr1:95582248-95582705	20.6496	-0.684391	0.402822	-1.69899	0.0893207	0.26856	32.5725	21.4164	20.3785	14.444	14.4368
713	Chr1:95650267-95650926	35.7562	-0.318533	0.33833	-0.941486	0.346456	0.583089	37.0142	45.5098	34.6434	33.2213	28.3923
714	Chr1:95651640-95652173	27.072	-0.553844	0.377162	-1.46845	0.141981	0.353812	26.6503	42.8328	27.8506	18.7772	19.249
715	Chr1:95697371-95697953	35.0415	0.658244	0.365937	1.79879	0.0720517	0.236543	28.1308	21.4164	33.9641	45.4987	46.1976
716	Chr1:95700460-95700965	30.663	-1.39833	0.350764	-3.98654	6.7e-05	0.0013952	54.7811	45.5098	21.737	14.444	16.8429
717	Chr1:95721733-95722200	25.2775	-0.603442	0.375867	-1.60546	0.108392	0.302465	32.5725	32.1246	21.737	23.1105	16.8429
718	Chr1:95722051-95722842	35.8653	0.608049	0.358647	1.6954	0.0900001	0.269627	22.2085	32.1246	40.757	43.3321	40.9042
719	Chr1:95931568-95932422	28.264	0.477422	0.386297	1.23589	0.216498	0.451118	20.728	24.0934	34.6434	35.3879	26.4674
720	Chr1:95976980-95977442	8.79954	0.610961	0.552077	1.10666	0.268441	0.508628	4.44171	8.03114	11.5478	12.2774	7.69961
721	Chr1:97209740-97210213	12.8787	0.235288	0.490173	0.48001	0.63122	0.803237	11.8446	10.7082	19.6992	10.1108	12.0306
722	Chr1:97210121-97210659	21.7945	-0.507817	0.394013	-1.28883	0.197456	0.426423	25.1697	29.4475	19.6992	15.8884	18.7678
723	Chr1:97210381-97210791	15.2503	-0.170068	0.448284	-0.379376	0.704409	0.847096	14.8057	18.7393	13.5857	13.7218	15.3992
724	Chr1:97210557-97211024	16.6707	-0.333599	0.440022	-0.758142	0.448366	0.671723	13.3251	26.7705	16.3028	12.9996	13.9555
725	Chr1:97563829-97564272	12.5071	0.138461	0.485309	0.285305	0.77541	0.888001	10.364	13.3852	10.8685	12.9996	14.918
726	Chr1:97564163-97564673	16.826	0.635961	0.464778	1.36831	0.171214	0.394438	8.88342	16.0623	15.6235	19.4995	24.0613
727	Chr1:99557309-99557823	27.7875	-0.831352	0.362889	-2.29093	0.0219677	0.1108	32.5725	45.5098	19.6992	22.3883	18.7678
728	Chr1:99665384-99666107	35.4892	1.3878	0.394731	3.51581	0.000438409	0.0062882	22.2085	8.03114	43.4741	55.6095	48.1226
729	Chr1:99665941-99666526	34.4331	0.0830651	0.348032	0.238671	0.811361	0.906741	29.6114	37.4787	36.002	35.3879	33.6858
730	Chr1:99666964-99667421	28.3312	-0.448338	0.364527	-1.22992	0.218728	0.453072	42.9365	24.0934	26.492	23.1105	25.0237
731	Chr1:99761997-99762435	5.07127	1.1251	0.620531	1.81313	0.0698122	0.231895	2.96114	0	7.47211	10.1108	4.81226
732	Chr1:99873281-99874142	26.2724	0.146818	0.390882	0.375607	0.707209	0.848631	16.2863	34.8016	28.5299	25.2771	26.4674
733	Chr1:99991269-99992105	35.1995	-0.275095	0.336951	-0.816422	0.414259	0.643663	41.456	37.4787	33.2849	31.0547	32.7233
734	Chr1:106665230-106665736	12.3231	0.648764	0.50368	1.28805	0.197729	0.426797	8.88342	8.03114	16.3028	11.5552	16.8429
735	Chr1:106665568-106666036	12.9636	0.618697	0.498925	1.24006	0.214953	0.449176	5.92228	13.3852	14.9442	16.6106	13.9555
736	Chr1:106890540-106890997	7.52751	-0.0600609	0.548624	-0.109476	0.912825	0.959455	11.8446	2.67705	7.47211	7.94422	7.69961
737	Chr1:107252692-107253112	16.6334	-0.496788	0.432702	-1.14811	0.250924	0.489448	17.7668	24.0934	12.9064	15.8884	12.5119
738	Chr1:107252918-107253371	23.051	-0.865395	0.389484	-2.2219	0.0262899	0.124394	28.1308	37.4787	14.2649	20.9439	14.4368
739	Chr1:107559386-107560124	50.6972	0.397742	0.319249	1.24587	0.212814	0.446392	37.0142	48.1869	48.9084	64.9982	54.3785
740	Chr1:107559866-107560290	30.1441	-0.562751	0.352714	-1.59549	0.110603	0.305776	34.0531	42.8328	23.7749	24.5549	25.505
741	Chr1:107560351-107560819	27.8849	-0.788687	0.365389	-2.15848	0.0308902	0.138608	45.8977	29.4475	25.8127	18.055	20.2115
742	Chr1:107677173-107677666	23.1642	-0.869366	0.383896	-2.26459	0.0235381	0.115934	31.092	34.8016	13.5857	18.055	18.2866
743	Chr1:107710007-107710446	7.18106	0.38446	0.566738	0.678373	0.497535	0.71027	5.92228	5.3541	10.1892	5.77761	8.66206
744	Chr1:107740955-107741499	14.9482	0.0646659	0.4572	0.141439	0.887523	0.947742	13.3251	16.0623	13.5857	14.444	17.3241
745	Chr1:107777490-107777954	6.37668	0.84073	0.590729	1.42321	0.154676	0.371136	5.92228	0	8.15139	8.66642	9.14328
746	Chr1:108067510-108068007	15.5789	1.20749	0.492816	2.45019	0.0142779	0.0832352	8.88342	5.3541	21.0578	20.9439	21.6551
747	Chr1:108609983-108610668	18.6398	0.547089	0.443284	1.23417	0.217139	0.451866	10.364	18.7393	21.737	21.6661	20.6927
748	Chr1:108611032-108611460	11.1298	-0.10711	0.493442	-0.217068	0.828155	0.915499	14.8057	8.03114	10.1892	10.1108	12.5119
749	Chr1:108655322-108656330	62.3619	-0.453833	0.283031	-1.60347	0.10883	0.303132	75.5091	74.9573	48.2291	51.9985	61.1156
750	Chr1:108656376-108656962	21.8144	0.999942	0.436628	2.29015	0.0220128	0.11096	11.8446	13.3852	29.2092	28.1659	26.4674
751	Chr1:108692165-108692937	46.9523	0.554563	0.328029	1.69059	0.0909148	0.271283	42.9365	26.7705	54.3426	59.2206	51.4911
752	Chr1:108692789-108693323	32.5153	-1.06644	0.341747	-3.12054	0.00180518	0.0190537	44.4171	53.541	21.0578	19.4995	24.0613
753	Chr1:111831027-111831499	3.39597	1.10799	0.634659	1.74581	0.0808442	0.25327	1.48057	0	6.11354	3.61101	5.77471
754	Chr1:111879043-111879944	25.1341	0.372739	0.40629	0.917422	0.358922	0.594536	31.092	8.03114	24.4542	30.3325	31.7609
755	Chr1:113477918-113478351	3.29249	1.53112	0.634402	2.41349	0.0158005	0.0892724	0	0	6.11354	5.05541	5.29348
756	Chr1:113522562-113523097	6.49612	0.393435	0.577462	0.681317	0.495671	0.708838	8.88342	0	7.47211	7.94422	8.18083
757	Chr1:113760646-113761621	35.2332	-0.24201	0.342984	-0.705601	0.480436	0.697379	47.3782	29.4475	35.3227	28.8881	35.1295
758	Chr1:114312951-114313590	14.3218	0.488607	0.479471	1.01906	0.308177	0.548576	13.3251	8.03114	12.2271	17.3328	20.6927
759	Chr1:115647305-115647930	5.30218	1.94715	0.633338	3.07443	0.00210904	0.02146	0	0	10.8685	5.05541	10.587
760	Chr1:120206517-120207895	88.1381	0.487075	0.273612	1.78016	0.075049	0.242652	81.4313	56.218	106.647	106.886	89.5079
761	Chr1:120207980-120208447	26.0565	0.197276	0.389961	0.505888	0.612936	0.791649	29.6114	16.0623	28.5299	32.4991	23.58
762	Chr1:120218361-120218810	26.6723	-0.882312	0.367899	-2.39825	0.0164738	0.0916414	47.3782	26.7705	19.0199	20.9439	19.249
763	Chr1:120218590-120219666	61.7761	0.585989	0.299159	1.95879	0.0501373	0.189687	51.8199	40.1557	67.9283	74.3868	74.59
764	Chr1:120284492-120284953	28.1852	0.743578	0.399476	1.86138	0.0626902	0.217213	19.2474	18.7393	39.3984	37.5545	25.9862
765	Chr1:120284759-120285556	63.248	0.000968855	0.289976	0.00334116	0.997334	0.998698	53.3005	74.9573	68.6075	60.665	58.7095
766	Chr1:120285443-120285929	31.324	-0.0445142	0.356812	-0.124755	0.900717	0.954647	29.6114	34.8016	33.9641	28.8881	29.3548
767	Chr1:120355562-120356165	28.3332	-2.04747	0.361476	-5.66419	1.48e-08	1.14e-06	59.2228	48.1869	10.1892	11.5552	12.5119
768	Chr1:120356059-120356748	28.4992	0.0443161	0.375189	0.118117	0.905975	0.956835	22.2085	34.8016	29.8884	31.0547	24.5425
769	Chr1:120484924-120485485	7.71628	0.341664	0.563848	0.60595	0.544548	0.746026	2.96114	10.7082	9.50996	5.77761	9.62451
770	Chr1:120524258-120524881	75.0626	-1.89816	0.265841	-7.1402	9.32e-13	2.12e-10	136.212	136.529	29.8884	34.6657	38.0168
771	Chr1:120524621-120525399	69.8956	-1.01828	0.276188	-3.68693	0.00022698	0.0037659	82.9119	123.144	46.1912	46.2209	51.0099
772	Chr1:120734067-120734622	13.885	0.0623619	0.466333	0.133728	0.893617	0.950933	17.7668	8.03114	14.2649	14.444	14.918
773	Chr1:120944236-120944764	30.8495	-0.355683	0.354253	-1.00404	0.315361	0.55543	32.5725	40.1557	27.8506	23.8327	29.836
774	Chr1:121040221-121041018	20.3569	0.221159	0.41946	0.527247	0.598022	0.782128	22.2085	13.3852	19.0199	21.6661	25.505
775	Chr1:121400869-121401491	35.9912	-0.882033	0.330148	-2.67163	0.00754837	0.0538475	45.8977	56.218	25.1335	25.2771	27.4299
776	Chr1:121544529-121545183	27.0168	0.424875	0.385713	1.10153	0.270664	0.510989	22.2085	21.4164	30.5677	32.4991	28.3923
777	Chr1:121545067-121545702	30.4066	-1.16873	0.352394	-3.31654	0.000911408	0.0112194	50.3394	42.8328	16.9821	24.5549	17.3241
778	Chr1:121732808-121733553	42.6323	0.587056	0.340762	1.72278	0.0849291	0.261305	29.6114	34.8016	49.5876	56.3317	42.8291
779	Chr1:121733476-121734122	36.6028	-0.79922	0.32666	-2.44664	0.0144195	0.0837795	51.8199	48.1869	27.1713	27.4437	28.3923
780	Chr1:121809003-121809827	38.1497	0.501023	0.352119	1.42288	0.154771	0.371268	38.4948	18.7393	46.8705	46.2209	40.4229
781	Chr1:121809770-121810252	11.6087	0.297417	0.502437	0.59195	0.553884	0.752884	13.3251	5.3541	16.9821	10.833	11.5494
782	Chr1:121893433-121893899	13.2736	0.346758	0.484519	0.715675	0.474192	0.692632	13.3251	8.03114	19.0199	11.5552	14.4368
783	Chr1:121893688-121894159	17.2138	-0.0285997	0.442758	-0.0645944	0.948497	0.976751	25.1697	8.03114	20.3785	13.7218	18.7678
784	Chr1:121970370-121970803	11.9837	-0.284863	0.480324	-0.593064	0.553138	0.752592	16.2863	10.7082	12.2271	8.66642	12.0306
785	Chr1:122017109-122017694	24.8773	0.300993	0.392691	0.766488	0.443386	0.668083	23.6891	18.7393	28.5299	24.5549	28.8735
786	Chr1:122017903-122018389	20.7358	0.550772	0.426619	1.29102	0.196698	0.425612	19.2474	10.7082	21.737	27.4437	24.5425
787	Chr1:122161278-122162016	23.3891	0.545198	0.41706	1.30724	0.191131	0.419024	25.1697	8.03114	23.0956	28.8881	31.7609
788	Chr1:122253985-122254544	6.49533	1.05766	0.596566	1.77292	0.0762418	0.244748	2.96114	2.67705	9.50996	8.66642	8.66206
789	Chr1:122270863-122271334	8.10444	0.696138	0.567098	1.22754	0.219618	0.454146	2.96114	8.03114	8.83067	12.9996	7.69961
790	Chr1:123074446-123074918	7.13037	0.530577	0.572123	0.927383	0.353728	0.589407	8.88342	0	6.79283	9.38862	10.587
791	Chr1:123223575-123224387	33.513	0.311446	0.386598	0.805607	0.420469	0.648697	45.8977	8.03114	41.4362	31.7769	40.4229
792	Chr1:123327568-123328095	20.4417	-0.815292	0.408174	-1.99741	0.0457805	0.178883	28.1308	29.4475	13.5857	10.833	20.2115
793	Chr1:123463355-123464196	32.2135	1.45067	0.414221	3.50216	0.000461503	0.00651727	16.2863	10.7082	38.0398	57.0539	38.9793
794	Chr1:124340083-124340673	5.10005	1.48955	0.628104	2.3715	0.0177159	0.0963952	1.48057	0	12.2271	5.05541	6.73716
795	Chr1:125942390-125943049	17.6936	0.0339692	0.433743	0.0783164	0.937576	0.972018	20.728	13.3852	19.6992	14.444	20.2115
796	Chr1:127330814-127331614	49.1097	0.403884	0.320961	1.25836	0.208262	0.440192	42.9365	37.4787	64.5319	50.5541	50.0475
797	Chr1:127332458-127333097	35.198	0.449903	0.364698	1.23363	0.217341	0.452047	39.9754	13.3852	40.0777	42.6099	39.9417
798	Chr1:127422328-127422751	7.74574	1.01652	0.57705	1.76157	0.0781416	0.248451	4.44171	2.67705	10.1892	12.2774	9.14328
799	Chr1:127456484-127457154	36.1089	0.0292377	0.341279	0.0856709	0.931728	0.968829	34.0531	37.4787	34.6434	39.7211	34.6482
800	Chr1:127457064-127457544	23.5205	-0.598638	0.394363	-1.51799	0.129017	0.334247	26.6503	34.8016	21.737	12.2774	22.1364
801	Chr1:127808168-127808767	19.4171	0.116132	0.421225	0.275701	0.782777	0.891777	22.2085	13.3852	21.0578	21.6661	18.7678
802	Chr1:128388986-128389653	20.9621	0.0888219	0.419162	0.211903	0.832182	0.918131	14.8057	26.7705	16.3028	23.8327	23.0988
803	Chr1:128726551-128726997	6.18069	0.988274	0.602196	1.64112	0.100773	0.288857	2.96114	2.67705	11.5478	5.05541	8.66206
804	Chr1:129101432-129101922	22.5492	-0.0518834	0.39972	-0.129799	0.896725	0.95238	22.2085	24.0934	26.492	20.2217	19.7302
805	Chr1:129573805-129574326	19.306	0.0988953	0.445219	0.222127	0.824215	0.913544	7.40285	32.1246	19.6992	16.6106	20.6927
806	Chr1:129669734-129670551	53.9972	0.549224	0.312059	1.76	0.0784082	0.249007	48.8588	32.1246	63.8526	62.1094	63.0405
807	Chr1:129670692-129671319	44.609	-1.15796	0.305807	-3.78657	0.000152742	0.0027439	66.6256	69.6033	27.8506	31.0547	27.9111
808	Chr1:129671091-129671954	66.7111	0.263544	0.284883	0.925093	0.354918	0.590462	63.6645	53.541	76.7589	70.7758	68.8152
809	Chr1:129765214-129766141	45.5961	0.00662269	0.319855	0.0207053	0.983481	0.991337	51.8199	37.4787	48.9084	49.8319	39.9417
810	Chr1:129991505-129991843	8.56883	0.637787	0.554193	1.15084	0.249798	0.488442	5.92228	5.3541	10.8685	12.9996	7.69961
811	Chr1:129999291-129999755	23.4115	-0.285136	0.402788	-0.707906	0.479004	0.696219	39.9754	10.7082	23.7749	20.9439	21.6551
812	Chr1:129999866-130000326	34.4947	-0.913334	0.333528	-2.73841	0.00617378	0.0469656	47.3782	50.8639	25.1335	25.9993	23.0988
813	Chr1:130000053-130000481	32.0682	-0.619063	0.35026	-1.76744	0.0771545	0.246555	35.5337	48.1869	29.2092	20.9439	26.4674
814	Chr1:130000231-130000739	31.6204	-0.15723	0.353808	-0.444393	0.656758	0.817497	31.092	37.4787	30.5677	26.7215	32.2421
815	Chr1:130140271-130140745	15.2981	0.24609	0.461982	0.532684	0.594252	0.779585	17.7668	8.03114	12.9064	19.4995	18.2866
816	Chr1:130140754-130141399	32.5502	-0.925905	0.346635	-2.67112	0.00755977	0.0538839	54.7811	37.4787	27.1713	18.7772	24.5425
817	Chr1:130200393-130200978	12.8873	0.708606	0.500482	1.41585	0.15682	0.3745	8.88342	8.03114	13.5857	19.4995	14.4368
818	Chr1:130255065-130255766	26.9529	0.999544	0.409055	2.44354	0.0145439	0.0842729	19.2474	10.7082	32.6056	38.9989	33.2046
819	Chr1:130255675-130256372	38.8901	-1.19703	0.327049	-3.6601	0.000252115	0.00410059	63.6645	56.218	31.247	21.6661	21.6551
820	Chr1:130312717-130313534	51.7775	0.224574	0.313464	0.716427	0.473728	0.69225	51.8199	40.1557	51.6255	65.7204	49.5662
821	Chr1:130313387-130314059	44.2482	-1.36803	0.31107	-4.39782	1.09e-05	0.000311116	75.5091	66.9262	25.1335	31.0547	22.6176
822	Chr1:131169824-131170542	21.1073	0.489965	0.433056	1.13141	0.257882	0.497003	14.8057	18.7393	22.4163	17.3328	32.2421
823	Chr1:132358735-132359229	24.1738	-0.503639	0.379266	-1.32793	0.184201	0.410891	28.1308	32.1246	19.6992	20.2217	20.6927
824	Chr1:132358979-132359616	32.5149	-0.622205	0.343156	-1.81318	0.0698035	0.231895	45.8977	37.4787	26.492	23.8327	28.8735
825	Chr1:132496125-132496660	5.61422	1.53518	0.623681	2.46147	0.0138367	0.081347	0	2.67705	9.50996	7.22202	8.66206
826	Chr1:132611803-132612523	39.5373	0.185812	0.337157	0.551115	0.581555	0.771386	31.092	42.8328	37.3605	42.6099	43.7915
827	Chr1:132612633-132613125	20.0437	0.279709	0.422356	0.662259	0.507805	0.717692	20.728	13.3852	20.3785	20.2217	25.505
828	Chr1:132613964-132614810	50.2432	-0.938454	0.297511	-3.15435	0.00160853	0.0175195	66.6256	77.6344	36.6813	31.7769	38.498
829	Chr1:132774757-132775286	8.78514	0.509585	0.547365	0.930979	0.351865	0.587519	7.40285	5.3541	9.50996	7.22202	14.4368
830	Chr1:132993009-132993587	17.8719	0.29514	0.4381	0.673681	0.500514	0.712352	14.8057	16.0623	19.0199	21.6661	17.8053
831	Chr1:132993520-132994010	21.4889	-0.910928	0.391789	-2.32505	0.0200695	0.104572	29.6114	32.1246	15.6235	16.6106	13.4743
832	Chr1:133033682-133034273	37.6472	1.18811	0.388417	3.05885	0.00222189	0.0223471	22.2085	16.0623	57.0597	57.7761	35.1295
833	Chr1:133034044-133034516	32.8336	0.457099	0.370115	1.23502	0.216824	0.451428	34.0531	16.0623	38.7191	42.6099	32.7233
834	Chr1:133034374-133034986	43.1873	-1.14777	0.309357	-3.71018	0.00020711	0.00351593	69.5868	61.5721	25.8127	29.6103	29.3548
835	Chr1:133042900-133043369	15.3711	0.835492	0.491965	1.69828	0.0894558	0.268776	10.364	8.03114	27.1713	18.7772	12.5119
836	Chr1:133049691-133050436	49.4631	-0.0493112	0.308515	-0.159834	0.873012	0.940542	59.2228	40.1557	50.9462	46.9431	50.0475
837	Chr1:133050265-133050939	34.8675	1.07251	0.381271	2.81299	0.00490827	0.0395906	22.2085	16.0623	40.757	53.4429	41.8666
838	Chr1:133141603-133142141	28.0974	-1.09468	0.368485	-2.97075	0.0029707	0.0275042	32.5725	53.541	15.6235	22.3883	16.3617
839	Chr1:133554384-133554904	5.7561	0.896254	0.605645	1.47983	0.138918	0.349196	2.96114	2.67705	10.8685	5.05541	7.21838
840	Chr1:133693827-133694570	34.8089	-0.275553	0.339181	-0.812406	0.416559	0.645357	38.4948	40.1557	29.2092	32.4991	33.6858
841	Chr1:133694330-133694724	12.8684	0.766426	0.506989	1.51172	0.130605	0.336726	4.44171	13.3852	14.2649	15.8884	16.3617
842	Chr1:133723872-133724546	35.5446	-0.5888	0.33776	-1.74325	0.0812902	0.254169	42.9365	48.1869	31.247	23.1105	32.2421
843	Chr1:133724455-133724980	29.3148	-0.75981	0.355812	-2.13542	0.0327264	0.143824	37.0142	42.8328	25.8127	20.2217	20.6927
844	Chr1:133724906-133725544	30.7178	0.00129499	0.358836	0.00360886	0.997121	0.998596	29.6114	32.1246	31.9263	28.1659	31.7609
845	Chr1:133763753-133764605	36.8926	-0.136231	0.335817	-0.405671	0.684984	0.835088	38.4948	40.1557	31.9263	35.3879	38.498
846	Chr1:133807313-133807858	44.7754	-1.79295	0.328334	-5.46076	4.74e-08	3.07e-06	60.7034	101.728	21.737	15.1662	24.5425
847	Chr1:133807869-133808617	59.4813	-0.0368773	0.297466	-0.123971	0.901338	0.954772	63.6645	56.218	66.5697	62.8316	48.1226
848	Chr1:133859459-133859966	25.1064	-0.787347	0.382986	-2.05581	0.0398007	0.16342	25.1697	45.5098	15.6235	18.055	21.1739
849	Chr1:133859667-133860440	32.4834	0.128752	0.360686	0.356965	0.721118	0.857688	25.1697	37.4787	28.5299	34.6657	36.5731
850	Chr1:133903672-133904295	36.7968	-0.565766	0.330762	-1.71049	0.0871746	0.265	51.8199	40.1557	33.2849	27.4437	31.2797
851	Chr1:133904045-133904427	23.2881	-1.18549	0.38096	-3.11185	0.00185917	0.0195189	35.5337	37.4787	13.5857	12.9996	16.8429
852	Chr1:133904585-133905059	27.1083	-0.356593	0.372871	-0.956343	0.338899	0.57613	26.6503	37.4787	27.8506	22.3883	21.1739
853	Chr1:133904811-133905314	28.924	0.00960073	0.3679	0.026096	0.979181	0.98984	28.1308	29.4475	31.9263	29.6103	25.505
854	Chr1:134035579-134036335	35.7021	-0.528794	0.336652	-1.57074	0.116243	0.31486	41.456	48.1869	25.8127	28.8881	34.167
855	Chr1:134195486-134195903	9.10363	-0.613806	0.539432	-1.13787	0.255173	0.494198	4.44171	21.4164	8.83067	3.61101	7.21838
856	Chr1:134212855-134213435	21.841	-0.239254	0.396684	-0.603136	0.546418	0.747271	26.6503	21.4164	19.0199	22.3883	19.7302
857	Chr1:134277093-134277818	19.5745	0.579926	0.435751	1.33087	0.183233	0.409673	19.2474	8.03114	21.737	25.2771	23.58
858	Chr1:134287597-134288054	20.2917	-0.363985	0.404424	-0.900009	0.368115	0.602711	23.6891	24.0934	19.0199	15.8884	18.7678
859	Chr1:134287908-134288379	22.3527	-0.942341	0.385102	-2.44699	0.0144055	0.0837763	32.5725	32.1246	16.9821	15.1662	14.918
860	Chr1:134288305-134288639	17.6487	-0.579851	0.422215	-1.37336	0.169642	0.392212	19.2474	26.7705	13.5857	13.7218	14.918
861	Chr1:134313545-134314002	12.0064	0.376093	0.506965	0.741852	0.458177	0.67931	8.88342	10.7082	19.0199	12.2774	9.14328
862	Chr1:134314053-134314784	29.9793	-0.62674	0.367805	-1.704	0.0883808	0.266893	31.092	48.1869	25.1335	16.6106	28.8735
863	Chr1:134373066-134373735	40.4036	0.467661	0.343838	1.36012	0.173793	0.397824	38.4948	24.0934	52.3048	46.2209	40.9042
864	Chr1:134374064-134374702	49.7405	0.48045	0.322403	1.49022	0.136167	0.345126	32.5725	48.1869	54.3426	62.1094	51.4911
865	Chr1:134417585-134418050	8.23285	0.666626	0.556223	1.19849	0.230728	0.466424	7.40285	2.67705	10.8685	8.66642	11.5494
866	Chr1:134638115-134638504	14.485	-0.289985	0.454656	-0.637812	0.523596	0.730235	19.2474	13.3852	10.1892	15.1662	14.4368
867	Chr1:134638361-134638811	11.4972	1.38	0.544473	2.53456	0.011259	0.0708131	7.40285	0	14.9442	18.7772	16.3617
868	Chr1:134777098-134777547	20.1869	-0.376793	0.405726	-0.928686	0.353052	0.58881	23.6891	24.0934	19.6992	15.1662	18.2866
869	Chr1:134817472-134817944	10.5731	0.971792	0.536167	1.81248	0.0699119	0.232016	5.92228	5.3541	12.2271	14.444	14.918
870	Chr1:134824847-134825526	8.68504	1.48798	0.58279	2.55321	0.0106735	0.0683953	4.44171	0	11.5478	11.5552	15.8804
871	Chr1:134920807-134921294	20.925	1.28326	0.458694	2.79763	0.00514791	0.0409928	14.8057	2.67705	26.492	31.7769	28.8735
872	Chr1:134921302-134921971	40.5955	-0.36522	0.322987	-1.13076	0.258157	0.49724	53.3005	40.1557	38.0398	38.2767	33.2046
873	Chr1:134929816-134930573	28.8195	0.0661161	0.370127	0.178631	0.858228	0.932696	31.092	24.0934	25.1335	32.4991	31.2797
874	Chr1:134930326-134930954	29.5254	-1.41434	0.35952	-3.93397	8.36e-05	0.00166826	51.8199	45.5098	11.5478	20.9439	17.8053
875	Chr1:134942158-134942662	16.1407	-0.00347639	0.44241	-0.00785784	0.99373	0.996624	16.2863	16.0623	15.6235	15.8884	16.8429
876	Chr1:135042657-135043131	7.90304	0.816816	0.579803	1.40878	0.1589	0.377566	0	10.7082	8.83067	10.833	9.14328
877	Chr1:135060415-135060907	23.069	-0.828122	0.387422	-2.13752	0.0325557	0.143344	32.5725	32.1246	13.5857	15.8884	21.1739
878	Chr1:135078967-135079420	15.326	0.230229	0.460371	0.500095	0.617008	0.793987	11.8446	16.0623	13.5857	15.8884	19.249
879	Chr1:135225852-135226439	23.879	-0.394641	0.384209	-1.02715	0.304348	0.544797	25.1697	32.1246	19.0199	22.3883	20.6927
880	Chr1:135260036-135260648	22.8354	-0.316548	0.392516	-0.806458	0.419979	0.648382	32.5725	18.7393	18.3406	22.3883	22.1364
881	Chr1:135319942-135320398	22.1573	-0.435754	0.396157	-1.09995	0.271352	0.511534	22.2085	32.1246	16.9821	21.6661	17.8053
882	Chr1:135331148-135331618	9.67808	-0.143885	0.518042	-0.277747	0.781206	0.891039	10.364	10.7082	9.50996	5.77761	12.0306
883	Chr1:135344934-135345407	9.89357	0.488343	0.540674	0.903211	0.366414	0.600962	2.96114	13.3852	12.9064	7.22202	12.9931
884	Chr1:135389542-135390105	21.3109	-0.162318	0.407667	-0.398164	0.69051	0.838411	17.7668	29.4475	16.9821	20.2217	22.1364
885	Chr1:135440188-135440658	5.64706	1.197	0.614006	1.9495	0.0512358	0.192065	1.48057	2.67705	7.47211	6.49982	10.1057
886	Chr1:135505575-135506163	19.4598	1.38939	0.474413	2.92865	0.00340441	0.0305146	10.364	5.3541	23.0956	32.4991	25.9862
887	Chr1:135506019-135506531	19.9591	0.180908	0.420874	0.429839	0.667313	0.823955	17.7668	18.7393	23.0956	22.3883	17.8053
888	Chr1:135557026-135557553	32.3185	0.357811	0.369602	0.968098	0.332995	0.570935	29.6114	24.0934	44.8327	28.8881	34.167
889	Chr1:135814268-135814939	9.19334	1.03009	0.561846	1.83341	0.0667422	0.225857	5.92228	2.67705	14.2649	7.22202	15.8804
890	Chr1:135974521-135975471	53.9384	0.304533	0.307487	0.990395	0.321981	0.561202	45.8977	48.1869	62.494	50.5541	62.5593
891	Chr1:135983448-135984000	14.7397	0.305171	0.467011	0.653455	0.513463	0.722118	11.8446	13.3852	17.6613	17.3328	13.4743
892	Chr1:135989707-135990151	14.0931	0.112824	0.466343	0.241933	0.808832	0.90539	13.3251	13.3852	12.2271	15.1662	16.3617
893	Chr1:135995402-135996015	15.444	1.23802	0.499921	2.47644	0.0132701	0.0791076	10.364	2.67705	20.3785	17.3328	26.4674
894	Chr1:135995888-135996546	18.1485	1.22135	0.473754	2.57802	0.00993685	0.0650926	7.40285	10.7082	23.7749	23.8327	25.0237
895	Chr1:136131329-136131978	15.1985	0.281956	0.471453	0.598056	0.549803	0.749963	8.88342	18.7393	11.5478	16.6106	20.2115
896	Chr1:136186638-136187123	7.63585	0.117036	0.557994	0.209745	0.833867	0.918983	4.44171	10.7082	8.83067	5.05541	9.14328
897	Chr1:136195651-136196159	16.296	0.119501	0.450748	0.265116	0.79092	0.89587	19.2474	10.7082	14.9442	14.444	22.1364
898	Chr1:136240728-136241390	24.3313	-0.167446	0.384652	-0.435318	0.663331	0.82181	28.1308	24.0934	21.0578	22.3883	25.9862
899	Chr1:136257745-136258333	33.304	-0.490349	0.343613	-1.42704	0.153569	0.369423	37.0142	45.5098	30.5677	24.5549	28.8735
900	Chr1:136258110-136259319	80.892	-0.925809	0.260387	-3.55551	0.000377243	0.00559592	125.848	101.728	65.2111	56.3317	55.3409
901	Chr1:136278525-136279131	21.0698	0.18852	0.417387	0.451666	0.65151	0.814713	23.6891	13.3852	20.3785	28.1659	19.7302
902	Chr1:136302422-136303720	87.3855	-0.214838	0.257647	-0.833847	0.404367	0.634905	106.601	82.9885	81.5139	83.0532	82.7708
903	Chr1:136311797-136312348	39.4745	-1.7057	0.325412	-5.24165	1.59e-07	8.44e-06	59.2228	80.3114	21.737	18.7772	17.3241
904	Chr1:136312432-136312994	31.4562	0.0819427	0.377138	0.217275	0.827994	0.91536	17.7668	45.5098	36.002	29.6103	28.3923
905	Chr1:136351475-136352158	38.5571	-0.0799278	0.355597	-0.224771	0.822158	0.912134	57.7422	18.7393	37.3605	44.7765	34.167
906	Chr1:136352186-136352875	37.2453	-0.100776	0.344368	-0.29264	0.769797	0.884414	48.8588	26.7705	40.0777	39.7211	30.7984
907	Chr1:136390588-136391203	25.3208	0.499183	0.406801	1.2271	0.219787	0.454398	22.2085	16.0623	30.5677	36.1101	21.6551
908	Chr1:136391092-136391651	34.0723	-0.984826	0.341489	-2.88391	0.00392765	0.0338998	41.456	58.8951	27.1713	20.2217	22.6176
909	Chr1:136391405-136391919	32.5415	-0.660136	0.346839	-1.90329	0.0570022	0.204765	35.5337	50.8639	26.492	22.3883	27.4299
910	Chr1:136409732-136410398	26.7601	-0.577912	0.36831	-1.56909	0.116627	0.31555	31.092	37.4787	19.0199	24.5549	21.6551
911	Chr1:136543112-136543699	20.4516	-0.310829	0.405593	-0.766357	0.443464	0.668083	25.1697	21.4164	21.737	16.6106	17.3241
912	Chr1:136605731-136606189	15.6838	-0.0624029	0.454357	-0.137343	0.89076	0.949267	11.8446	21.4164	12.9064	18.7772	13.4743
913	Chr1:136644197-136644691	6.6264	1.79004	0.618095	2.89606	0.00377879	0.0328955	1.48057	0	9.50996	10.1108	12.0306
914	Chr1:136851758-136852612	35.7943	-0.58027	0.331928	-1.74818	0.080433	0.252486	42.9365	48.1869	30.5677	28.8881	28.3923
915	Chr1:136852548-136853020	8.37145	0.961229	0.56504	1.70117	0.0889108	0.267767	7.40285	0	10.8685	11.5552	12.0306
916	Chr1:136859075-136859660	25.6854	-0.682211	0.368819	-1.84972	0.0643542	0.220957	35.5337	32.1246	21.0578	19.4995	20.2115
917	Chr1:136859522-136860022	11.6174	0.377745	0.50501	0.747995	0.454463	0.676641	10.364	8.03114	15.6235	14.444	9.62451
918	Chr1:137005400-137006157	26.2594	0.740147	0.399595	1.85224	0.0639914	0.220173	19.2474	16.0623	31.247	31.0547	33.6858
919	Chr1:137042883-137043331	17.9017	0.193676	0.436149	0.44406	0.656999	0.817603	16.2863	16.0623	21.0578	20.2217	15.8804
920	Chr1:137043675-137044319	47.4418	-0.981738	0.3157	-3.10972	0.00187263	0.0196303	60.7034	77.6344	42.7948	26.7215	29.3548
921	Chr1:137044098-137044590	36.4068	-0.559508	0.33557	-1.66734	0.0954475	0.279821	41.456	50.8639	35.3227	25.9993	28.3923
922	Chr1:137044345-137044836	18.6684	0.49841	0.438843	1.13574	0.256066	0.495143	19.2474	8.03114	21.0578	22.3883	22.6176
923	Chr1:137051109-137051571	7.34449	0.466151	0.573467	0.812864	0.416296	0.645106	7.40285	2.67705	8.83067	12.9996	4.81226
924	Chr1:137057342-137057990	12.2704	1.01393	0.517236	1.96028	0.0499628	0.18941	7.40285	5.3541	15.6235	15.1662	17.8053
925	Chr1:137154697-137155230	15.3276	0.207221	0.456682	0.453753	0.650007	0.813962	16.2863	10.7082	14.2649	16.6106	18.7678
926	Chr1:137209243-137210282	62.0686	0.505509	0.301551	1.67636	0.093667	0.276398	57.7422	37.4787	73.3625	77.2756	64.4842
927	Chr1:137210353-137210853	22.8186	6.07e-05	0.399219	0.000152054	0.999879	0.999879	28.1308	16.0623	25.1335	24.5549	20.2115
928	Chr1:137221376-137221868	9.23721	0.250379	0.533601	0.469224	0.638909	0.807128	5.92228	10.7082	12.2271	8.66642	8.66206
929	Chr1:137236430-137236929	7.38533	1.51562	0.601268	2.52071	0.0117119	0.0726805	1.48057	2.67705	10.8685	9.38862	12.5119
930	Chr1:137264935-137265426	13.9188	-0.312645	0.469519	-0.665883	0.505486	0.716103	25.1697	5.3541	10.1892	14.444	14.4368
931	Chr1:137270918-137271499	17.0418	0.435506	0.449098	0.969735	0.332178	0.570219	17.7668	8.03114	19.6992	20.9439	18.7678
932	Chr1:137271319-137271794	11.8844	0.0694573	0.49008	0.141726	0.887296	0.947659	16.2863	5.3541	11.5478	13.7218	12.5119
933	Chr1:137325937-137326659	23.7374	0.877779	0.419057	2.09465	0.0362021	0.153643	17.7668	10.7082	31.247	29.6103	29.3548
934	Chr1:137375392-137375881	5.62961	1.59974	0.624564	2.56136	0.0104262	0.0672768	1.48057	0	12.2271	7.22202	7.21838
935	Chr1:137406054-137406658	20.9938	0.996814	0.443716	2.24651	0.0246712	0.119675	14.8057	8.03114	25.8127	31.7769	24.5425
936	Chr1:137407047-137407639	23.2312	0.259969	0.4048	0.642217	0.520733	0.727939	28.1308	10.7082	25.8127	25.9993	25.505
937	Chr1:137481449-137481876	16.1588	-0.51614	0.452494	-1.14066	0.254012	0.49292	10.364	32.1246	10.8685	14.444	12.9931
938	Chr1:137584146-137584769	30.3818	-0.619151	0.35735	-1.73262	0.0831638	0.258174	34.0531	45.5098	24.4542	19.4995	28.3923
939	Chr1:137584624-137585098	29.3	-0.614215	0.358661	-1.71252	0.0868003	0.26449	31.092	45.5098	25.1335	21.6661	23.0988
940	Chr1:137584873-137585363	22.5715	-0.0307595	0.4129	-0.0744961	0.940616	0.973017	13.3251	34.8016	23.0956	18.055	23.58
941	Chr1:137604740-137605234	10.992	0.16512	0.507168	0.325573	0.744748	0.870038	7.40285	13.3852	11.5478	12.9996	9.62451
942	Chr1:137625627-137626314	30.432	-0.417668	0.357409	-1.1686	0.242565	0.480237	31.092	42.8328	26.492	22.3883	29.3548
943	Chr1:137662569-137663115	41.9894	-1.53497	0.346988	-4.4237	9.7e-06	0.000280009	42.9365	101.728	25.8127	18.7772	20.6927
944	Chr1:137663392-137663863	25.9695	0.688217	0.399408	1.72309	0.0848716	0.261191	17.7668	18.7393	31.247	31.7769	30.3172
945	Chr1:137663631-137664092	20.9546	1.0389	0.447183	2.32321	0.020168	0.104865	10.364	13.3852	31.9263	24.5549	24.5425
946	Chr1:137690169-137690569	7.88805	0.323175	0.550665	0.586881	0.557284	0.755417	7.40285	5.3541	8.15139	9.38862	9.14328
947	Chr1:137690317-137690641	7.18316	0.167158	0.558814	0.299129	0.764841	0.880819	7.40285	5.3541	6.79283	8.66642	7.69961
948	Chr1:137815264-137816092	24.7027	0.219271	0.393283	0.55754	0.577159	0.768535	20.728	24.0934	23.0956	29.6103	25.9862
949	Chr1:137903864-137904719	28.2271	0.972502	0.401749	2.42067	0.0154919	0.0880624	19.2474	13.3852	31.247	38.2767	38.9793
950	Chr1:137904591-137905046	12.4086	0.957271	0.522358	1.8326	0.0668626	0.225965	5.92228	8.03114	12.2271	22.3883	13.4743
951	Chr1:137914903-137915643	32.5739	-0.250222	0.347924	-0.719186	0.472026	0.69065	35.5337	37.4787	29.2092	27.4437	33.2046
952	Chr1:137947389-137947716	7.17008	0.66995	0.575853	1.1634	0.244666	0.482552	5.92228	2.67705	6.79283	12.2774	8.18083
953	Chr1:138001953-138002591	12.8315	0.766253	0.502286	1.52553	0.127126	0.331663	10.364	5.3541	14.2649	14.444	19.7302
954	Chr1:138027839-138028666	24.9134	-0.28016	0.381803	-0.733781	0.463082	0.683574	29.6114	26.7705	21.737	19.4995	26.9486
955	Chr1:138036620-138037304	20.316	0.24146	0.421044	0.573479	0.56632	0.76122	23.6891	10.7082	22.4163	24.5549	20.2115
956	Chr1:138056022-138056682	12.2784	0.4588	0.499592	0.91835	0.358436	0.593961	14.8057	2.67705	13.5857	12.9996	17.3241
957	Chr1:138156425-138156753	10.5205	0.0663524	0.504575	0.131501	0.895379	0.951709	11.8446	8.03114	11.5478	10.1108	11.0682
958	Chr1:138242276-138242784	23.4147	-0.998531	0.381994	-2.614	0.00894901	0.0605247	29.6114	40.1557	16.9821	14.444	15.8804
959	Chr1:138242673-138243278	24.1102	0.803229	0.419797	1.91337	0.0557002	0.201849	13.3251	18.7393	31.9263	32.4991	24.0613
960	Chr1:138291329-138291910	10.5942	0.917691	0.535689	1.7131	0.0866933	0.264321	4.44171	8.03114	14.2649	12.2774	13.9555
961	Chr1:138311714-138312280	30.2407	-1.54333	0.353088	-4.37095	1.24e-05	0.00034334	59.2228	42.8328	18.3406	17.3328	13.4743
962	Chr1:138312256-138312902	26.4658	0.513978	0.39269	1.30886	0.19058	0.418526	23.6891	16.0623	31.9263	33.2213	27.4299
963	Chr1:138346915-138347567	14.6323	0.259128	0.472103	0.548881	0.583087	0.772295	20.728	2.67705	16.3028	16.6106	16.8429
964	Chr1:138363042-138363745	38.1785	0.594673	0.355674	1.67196	0.0945319	0.278092	29.6114	26.7705	38.7191	54.8873	40.9042
965	Chr1:138466562-138466928	15.8227	0.407093	0.461002	0.883063	0.377202	0.610546	16.2863	8.03114	20.3785	19.4995	14.918
966	Chr1:138485314-138485943	11.3623	1.07455	0.534269	2.01125	0.0442989	0.174977	5.92228	5.3541	18.3406	10.833	16.3617
967	Chr1:138520893-138521412	23.8101	0.426709	0.404793	1.05414	0.291817	0.533401	23.6891	13.3852	24.4542	31.0547	26.4674
968	Chr1:138521418-138521959	25.9247	-1.50412	0.367564	-4.09214	4.27e-05	0.000973248	39.9754	48.1869	14.2649	13.7218	13.4743
969	Chr1:138592820-138593768	56.2873	0.908907	0.320416	2.83665	0.00455895	0.0376488	44.4171	24.0934	69.9661	70.7758	72.1838
970	Chr1:138603682-138604130	11.1418	0.525071	0.513659	1.02222	0.306678	0.547368	10.364	5.3541	10.8685	16.6106	12.5119
971	Chr1:138604147-138604749	19.9742	-0.159432	0.409614	-0.389225	0.697109	0.842908	23.6891	18.7393	20.3785	18.7772	18.2866
972	Chr1:138678351-138678841	10.0297	1.66248	0.573941	2.89659	0.00377237	0.032892	4.44171	0	15.6235	13.7218	16.3617
973	Chr1:138849004-138849483	26.9281	0.525728	0.389469	1.34986	0.177061	0.402136	22.2085	18.7393	33.2849	28.1659	32.2421
974	Chr1:139117985-139118388	10.3911	0.295971	0.516284	0.573273	0.56646	0.76122	7.40285	10.7082	12.9064	9.38862	11.5494
975	Chr1:139118182-139118675	13.6605	0.514386	0.490387	1.04894	0.294207	0.536343	5.92228	16.0623	13.5857	17.3328	15.3992
976	Chr1:139220604-139221092	6.86588	1.49346	0.605202	2.4677	0.0135984	0.0804149	2.96114	0	10.1892	10.1108	11.0682
977	Chr1:139795042-139795514	6.45635	1.75932	0.619118	2.84166	0.00448796	0.0372668	1.48057	0	11.5478	8.66642	10.587
978	Chr1:140179953-140180406	6.88334	1.47389	0.607297	2.42697	0.0152254	0.08706	2.96114	0	8.83067	14.444	8.18083
979	Chr1:140514147-140514742	24.5929	1.05307	0.427276	2.46463	0.0137156	0.0809012	17.7668	8.03114	27.8506	38.9989	30.3172
980	Chr1:140516394-140516926	23.325	0.781797	0.424323	1.84246	0.065408	0.223051	20.728	8.03114	26.492	35.3879	25.9862
981	Chr1:140727743-140728230	6.99836	0.573461	0.573974	0.999108	0.317743	0.557202	4.44171	5.3541	8.83067	7.22202	9.14328
982	Chr1:140744785-140745412	21.4059	0.471084	0.427211	1.10269	0.27016	0.51053	13.3251	21.4164	29.2092	18.055	25.0237
983	Chr1:140859531-140860025	20.0712	-0.0478068	0.417449	-0.114521	0.908825	0.957844	22.2085	18.7393	19.6992	15.1662	24.5425
984	Chr1:140860008-140861220	68.123	-0.552162	0.285816	-1.93188	0.0533747	0.196825	79.9508	91.0196	69.2868	44.0543	56.3034
985	Chr1:141317958-141318827	48.086	0.111325	0.3131	0.355556	0.722173	0.858162	41.456	50.8639	48.2291	52.7207	47.1601
986	Chr1:141318811-141319283	28.0165	-0.61831	0.365623	-1.69111	0.0908154	0.271081	32.5725	40.1557	19.6992	27.4437	20.2115
987	Chr1:141351220-141351876	44.9482	-1.02085	0.305096	-3.34598	0.000819919	0.0102759	69.5868	61.5721	31.247	32.4991	29.836
988	Chr1:141351650-141352121	30.1522	-0.453882	0.356241	-1.27409	0.202633	0.432967	31.092	42.8328	25.8127	27.4437	23.58
989	Chr1:141351925-141352536	28.5477	0.377246	0.381381	0.989159	0.322585	0.561783	29.6114	16.0623	33.2849	35.3879	28.3923
990	Chr1:142142207-142142753	19.0101	0.352994	0.430298	0.820347	0.412018	0.641475	17.7668	13.3852	21.0578	23.1105	19.7302
991	Chr1:142142676-142143382	23.7392	1.47357	0.452413	3.25713	0.00112546	0.0132435	14.8057	2.67705	28.5299	36.1101	36.5731
992	Chr1:145548600-145549159	27.5316	1.23058	0.421151	2.92196	0.00347838	0.0310149	17.7668	8.03114	35.3227	44.7765	31.7609
993	Chr1:145549011-145549778	55.3652	-0.406833	0.290845	-1.3988	0.161874	0.381869	71.0673	58.8951	48.9084	51.2763	46.6789
994	Chr1:145549606-145550264	43.577	-1.76216	0.310296	-5.67898	1.36e-08	1.06e-06	79.9508	74.9573	20.3785	19.4995	23.0988
995	Chr1:145586162-145586639	13.1729	0.744257	0.497482	1.49605	0.134641	0.342789	8.88342	8.03114	17.6613	17.3328	13.9555
996	Chr1:145586858-145587678	38.2746	0.480422	0.349806	1.3734	0.169629	0.392212	26.6503	34.8016	42.7948	49.1097	38.0168
997	Chr1:145617525-145618145	12.8826	0.658968	0.499026	1.32051	0.186665	0.41383	7.40285	10.7082	17.6613	15.1662	13.4743
998	Chr1:145623712-145624256	35.0154	-0.842021	0.332771	-2.53033	0.0113954	0.0713441	44.4171	53.541	25.1335	25.9993	25.9862
999	Chr1:145624300-145624852	36.237	-0.866099	0.346745	-2.4978	0.0124967	0.0757881	37.0142	66.9262	23.0956	22.3883	31.7609
1000	Chr1:145624733-145625698	59.095	0.487024	0.299547	1.62587	0.103978	0.294581	45.8977	48.1869	65.8904	70.0536	65.4467
1001	Chr1:145850954-145851490	29.3295	-1.48483	0.375691	-3.95226	7.74e-05	0.0015682	68.1062	29.4475	11.5478	20.2217	17.3241
1002	Chr1:145851399-145852062	25.1012	0.193709	0.414167	0.467707	0.639994	0.807446	37.0142	5.3541	25.1335	32.4991	25.505
1003	Chr1:148344473-148345501	35.9587	0.697049	0.363062	1.91992	0.0548685	0.200112	22.2085	29.4475	36.6813	46.2209	45.2352
1004	Chr1:151019933-151020505	9.06033	1.4843	0.578002	2.56799	0.010229	0.0664141	2.96114	2.67705	12.2271	12.9996	14.4368
1005	Chr1:151807878-151808468	12.3034	0.619955	0.515571	1.20246	0.229184	0.465178	2.96114	16.0623	16.9821	12.9996	12.5119
1006	Chr1:151946570-151947150	18.9664	0.125983	0.42384	0.297241	0.766283	0.881662	19.2474	16.0623	21.737	18.055	19.7302
1007	Chr1:152239268-152239967	44.6504	0.142103	0.325217	0.436948	0.662149	0.82098	47.3782	34.8016	52.984	47.6653	40.4229
1008	Chr1:152240784-152241186	20.715	0.277896	0.42003	0.661608	0.508222	0.717705	23.6891	10.7082	25.1335	23.8327	20.2115
1009	Chr1:152840011-152840735	33.5719	-0.466134	0.340015	-1.37092	0.1704	0.393291	41.456	40.1557	29.2092	26.7215	30.3172
1010	Chr1:153024872-153025561	20.0432	1.02158	0.458181	2.22964	0.0257712	0.12287	13.3251	8.03114	31.9263	28.1659	18.7678
1011	Chr1:153192562-153193364	38.9361	1.20488	0.379187	3.17753	0.00148533	0.0164504	25.1697	13.3852	50.9462	62.8316	42.3478
1012	Chr1:153276087-153276917	56.5726	0.652051	0.313076	2.08272	0.0372765	0.156748	50.3394	29.4475	65.8904	72.2202	64.9654
1013	Chr1:153346779-153347266	23.1	0.449589	0.409391	1.09819	0.272121	0.512229	22.2085	13.3852	30.5677	25.2771	24.0613
1014	Chr1:153347319-153348003	37.9278	-1.34516	0.32647	-4.12032	3.78e-05	0.000882153	60.7034	61.5721	27.1713	19.4995	20.6927
1015	Chr1:153348149-153348611	17.098	-0.219595	0.434699	-0.505165	0.613443	0.792065	19.2474	18.7393	17.6613	11.5552	18.2866
1016	Chr1:153418437-153418817	17.0599	-0.862456	0.429042	-2.01019	0.0444111	0.175298	22.2085	26.7705	15.6235	8.66642	12.0306
1017	Chr1:153418523-153419071	21.1133	-0.543446	0.400994	-1.35525	0.175339	0.399935	26.6503	26.7705	20.3785	12.9996	18.7678
1018	Chr1:153601593-153602229	29.1851	0.612814	0.385056	1.59149	0.111499	0.307191	19.2474	24.0934	37.3605	35.3879	29.836
1019	Chr1:153602367-153602956	36.1318	-1.05808	0.338807	-3.12294	0.00179052	0.0189223	47.3782	61.5721	23.0956	18.7772	29.836
1020	Chr1:153602773-153603303	35.3673	-0.386317	0.336452	-1.14821	0.250882	0.489404	47.3782	34.8016	33.2849	31.0547	30.3172
1021	Chr1:153937805-153938135	14.4407	-0.18542	0.470449	-0.394135	0.693482	0.840306	8.88342	24.0934	11.5478	16.6106	11.0682
1022	Chr1:153938009-153938477	18.5718	0.00972349	0.43255	0.0224794	0.982066	0.990735	11.8446	26.7705	17.6613	18.7772	17.8053
1023	Chr1:154232948-154233717	25.6391	0.132139	0.391069	0.337893	0.735444	0.865399	28.1308	18.7393	27.1713	32.4991	21.6551
1024	Chr1:154247357-154247837	7.94476	0.12848	0.553218	0.23224	0.816351	0.908922	13.3251	0	8.83067	6.49982	11.0682
1025	Chr1:154471657-154472178	22.8537	0.476404	0.416741	1.14317	0.25297	0.491865	13.3251	24.0934	21.737	25.2771	29.836
1026	Chr1:154472258-154472756	17.3211	0.344078	0.445223	0.77282	0.439629	0.665284	13.3251	16.0623	16.3028	21.6661	19.249
1027	Chr1:154577710-154578199	7.67602	1.271	0.589807	2.15494	0.0311667	0.139434	2.96114	2.67705	7.47211	10.833	14.4368
1028	Chr1:154613187-154613631	23.5842	-1.21708	0.379135	-3.21016	0.00132662	0.0150106	37.0142	37.4787	13.5857	12.9996	16.8429
1029	Chr1:154613920-154614532	28.0464	-0.431897	0.366647	-1.17797	0.23881	0.475745	32.5725	34.8016	27.8506	25.2771	19.7302
1030	Chr1:154614398-154614864	18.6044	0.86098	0.463163	1.85892	0.0630391	0.218049	11.8446	10.7082	23.7749	30.3325	16.3617
1031	Chr1:154626375-154626755	4.12989	0.175971	0.619529	0.284039	0.77638	0.888595	4.44171	2.67705	6.79283	1.4444	5.29348
1032	Chr1:154749860-154750382	35.4214	-1.67272	0.332247	-5.03457	4.79e-07	2.18e-05	62.1839	61.5721	20.3785	16.6106	16.3617
1033	Chr1:154801896-154802699	29.4483	0.128931	0.378084	0.341011	0.733096	0.863912	26.6503	29.4475	27.8506	23.8327	39.4605
1034	Chr1:154918874-154919438	16.9058	0.7953	0.47621	1.67006	0.094907	0.278889	14.8057	5.3541	13.5857	28.1659	22.6176
1035	Chr1:155032741-155033642	31.7688	-0.122808	0.362287	-0.33898	0.734625	0.865015	23.6891	45.5098	32.6056	28.1659	28.8735
1036	Chr1:155178369-155178811	22.2014	1.40316	0.454159	3.08959	0.00200436	0.0207039	8.88342	10.7082	31.247	30.3325	29.836
1037	Chr1:155178560-155179141	31.1779	1.06262	0.392862	2.70483	0.006834	0.0504079	20.728	13.3852	42.1155	35.3879	44.2727
1038	Chr1:155179444-155180017	33.5846	-1.17365	0.345278	-3.39916	0.000675938	0.00881359	45.8977	58.8951	21.737	15.8884	25.505
1039	Chr1:155180482-155180870	24.4458	0.379359	0.399201	0.950295	0.341962	0.57918	19.2474	21.4164	27.1713	30.3325	24.0613
1040	Chr1:155193022-155193494	12.8632	0.664074	0.501069	1.32531	0.185067	0.412035	7.40285	10.7082	11.5478	17.3328	17.3241
1041	Chr1:155201004-155201343	4.53219	0.302378	0.609668	0.495971	0.619915	0.795993	4.44171	2.67705	5.43426	4.33321	5.77471
1042	Chr1:155272114-155272752	21.2054	0.0093085	0.409513	0.0227306	0.981865	0.990735	20.728	21.4164	25.1335	20.9439	17.8053
1043	Chr1:155333463-155334257	57.3388	-0.164089	0.297241	-0.552039	0.580922	0.770941	50.3394	74.9573	55.0219	49.1097	57.2658
1044	Chr1:155340812-155341284	14.1177	0.0505029	0.473368	0.106688	0.915036	0.9604	11.8446	16.0623	10.1892	19.4995	12.9931
1045	Chr1:155379775-155380232	6.44424	0.694117	0.593664	1.16921	0.242319	0.479824	2.96114	5.3541	10.1892	3.61101	10.1057
1046	Chr1:155396426-155396961	26.8475	0.200727	0.399082	0.502973	0.614983	0.792862	26.6503	21.4164	19.0199	39.7211	27.4299
1047	Chr1:155489197-155489740	11.4014	1.00179	0.531006	1.88658	0.0592164	0.210045	10.364	0	12.2271	16.6106	17.8053
1048	Chr1:155500127-155500819	19.1802	0.816924	0.446113	1.8312	0.0670704	0.226309	13.3251	10.7082	24.4542	25.2771	22.1364
1049	Chr1:155570246-155570787	6.15945	1.29938	0.609955	2.13029	0.0331479	0.144956	1.48057	2.67705	8.83067	7.22202	10.587
1050	Chr1:155613237-155613694	5.66185	0.437491	0.593785	0.736784	0.461254	0.681899	7.40285	0	8.15139	5.05541	7.69961
1051	Chr1:155654587-155655245	10.7311	0.366772	0.513775	0.713878	0.475303	0.693503	13.3251	2.67705	13.5857	12.9996	11.0682
1052	Chr1:155746951-155747479	31.6288	-1.29306	0.346713	-3.72947	0.00019188	0.00331898	57.7422	42.8328	18.3406	16.6106	22.6176
1053	Chr1:155800387-155800835	5.31769	0.60587	0.602502	1.00559	0.314612	0.554666	5.92228	0	8.15139	5.77761	6.73716
1054	Chr1:155964566-155964919	5.63862	1.19322	0.61355	1.94479	0.0518008	0.193365	1.48057	2.67705	8.15139	7.22202	8.66206
1055	Chr1:156051778-156052761	28.3683	0.577758	0.391282	1.47658	0.139789	0.350547	14.8057	29.4475	32.6056	34.6657	30.3172
1056	Chr1:156573762-156574271	11.253	0.712613	0.516289	1.38026	0.167506	0.389313	8.88342	5.3541	12.9064	13.7218	15.3992
1057	Chr1:156731392-156731832	7.64156	0.422513	0.55999	0.754501	0.450549	0.6733	10.364	0	8.83067	9.38862	9.62451
1058	Chr1:156930116-156930661	24.8466	-0.83897	0.37366	-2.24528	0.0247503	0.119877	37.0142	32.1246	15.6235	20.2217	19.249
1059	Chr1:156945250-156945979	24.4657	-0.012477	0.405323	-0.0307829	0.975443	0.988407	16.2863	34.8016	30.5677	18.055	22.6176
1060	Chr1:156946508-156947074	36.2737	-2.57757	0.345989	-7.44986	9.34e-14	2.69e-11	87.3536	61.5721	12.2271	8.66642	11.5494
1061	Chr1:157005662-157006179	26.348	-1.24615	0.380462	-3.27535	0.00105531	0.012609	34.0531	50.8639	16.9821	10.1108	19.7302
1062	Chr1:157005926-157006706	40.1642	-0.376828	0.3356	-1.12285	0.261502	0.500889	32.5725	64.2492	33.9641	33.9435	36.0919
1063	Chr1:157071073-157071604	15.5163	-0.0368235	0.446972	-0.0823844	0.934341	0.970325	17.7668	13.3852	15.6235	14.444	16.3617
1064	Chr1:157091012-157091484	12.7684	0.305322	0.488441	0.625096	0.531908	0.736664	8.88342	13.3852	16.3028	12.2774	12.9931
1065	Chr1:157263445-157264634	56.5058	-0.618643	0.291233	-2.12422	0.0336516	0.146309	60.7034	85.6655	46.8705	44.0543	45.2352
1066	Chr1:157405156-157406280	52.022	-0.152344	0.305737	-0.498286	0.618283	0.794924	45.8977	66.9262	53.6633	48.3875	45.2352
1067	Chr1:157589350-157589882	26.7779	-1.13511	0.369217	-3.07438	0.0021094	0.02146	41.456	40.1557	18.3406	20.9439	12.9931
1068	Chr1:157659468-157660118	31.8537	-0.496888	0.35338	-1.4061	0.159694	0.378575	34.0531	45.5098	29.8884	20.9439	28.8735
1069	Chr1:157660008-157660637	19.2317	0.471435	0.434353	1.08537	0.277756	0.517848	16.2863	13.3852	25.8127	20.9439	19.7302
1070	Chr1:157819430-157820147	37.6513	-0.48854	0.331555	-1.47348	0.140621	0.351693	39.9754	53.541	31.9263	28.1659	34.6482
1071	Chr1:157820006-157820425	19.9153	-1.43025	0.402296	-3.55522	0.000377669	0.00559592	29.6114	37.4787	11.5478	10.833	10.1057
1072	Chr1:157820461-157821399	50.9035	0.37593	0.313308	1.19987	0.230189	0.466036	48.8588	34.8016	57.739	59.2206	53.8973
1073	Chr1:157882007-157882484	17.6937	1.39517	0.48477	2.878	0.00400204	0.0343912	8.88342	5.3541	25.1335	24.5549	24.5425
1074	Chr1:157882722-157883234	33.9209	-1.2459	0.336837	-3.69881	0.00021661	0.00364341	53.3005	53.541	23.7749	17.3328	21.6551
1075	Chr1:157887959-157888855	56.4517	0.232228	0.320558	0.724447	0.468791	0.687559	63.6645	34.8016	74.0418	62.1094	47.6413
1076	Chr1:158134768-158135466	32.2752	-0.540133	0.345996	-1.56109	0.118502	0.318504	38.4948	42.8328	24.4542	25.2771	30.3172
1077	Chr1:158233409-158233775	13.5348	-0.456486	0.46178	-0.988535	0.322891	0.562075	14.8057	18.7393	12.2271	12.2774	9.62451
1078	Chr1:158240725-158241225	12.2033	-0.121255	0.480864	-0.252161	0.800916	0.901404	14.8057	10.7082	9.50996	12.9996	12.9931
1079	Chr1:158240969-158241378	9.4806	-0.208424	0.518493	-0.401981	0.687698	0.836941	10.364	10.7082	6.11354	11.5552	8.66206
1080	Chr1:158350605-158351113	17.3377	0.428047	0.445015	0.961869	0.336115	0.573662	16.2863	10.7082	19.0199	20.9439	19.7302
1081	Chr1:158351180-158351843	23.0665	1.0252	0.436425	2.34909	0.0188193	0.100405	8.88342	18.7393	25.1335	33.2213	29.3548
1082	Chr1:158403833-158404543	27.7529	-0.379667	0.365717	-1.03814	0.299204	0.540529	31.092	34.8016	23.7749	21.6661	27.4299
1083	Chr1:158489072-158489430	20.1324	-1.51449	0.398987	-3.79584	0.000147145	0.00266014	34.0531	34.8016	10.8685	10.833	10.1057
1084	Chr1:158489267-158489700	17.9657	-1.12146	0.421725	-2.65922	0.00783229	0.0552423	26.6503	29.4475	10.8685	7.94422	14.918
1085	Chr1:158489566-158490061	20.5254	0.268533	0.419453	0.640198	0.522044	0.728984	23.6891	10.7082	21.0578	23.1105	24.0613
1086	Chr1:158545861-158546277	7.03811	0.570117	0.574009	0.99322	0.320603	0.55988	4.44171	5.3541	9.50996	8.66642	7.21838
1087	Chr1:158603643-158604565	41.3639	-0.143047	0.324803	-0.440411	0.659639	0.819295	38.4948	50.8639	38.0398	37.5545	41.8666
1088	Chr1:158648406-158648847	23.9517	-0.767812	0.390845	-1.96449	0.0494728	0.188313	26.6503	40.1557	19.0199	12.2774	21.6551
1089	Chr1:158648595-158649307	39.1519	-1.58168	0.33582	-4.7099	2.48e-06	8.88e-05	54.7811	80.3114	26.492	15.8884	18.2866
1090	Chr1:158649230-158649929	32.5093	0.112773	0.355429	0.317286	0.751027	0.873867	34.0531	26.7705	31.9263	37.5545	32.2421
1091	Chr1:158678268-158678926	12.8551	0.923121	0.509191	1.81292	0.0698448	0.231914	8.88342	5.3541	15.6235	13.7218	20.6927
1092	Chr1:158869091-158869541	22.2469	-1.02849	0.404179	-2.54464	0.0109391	0.0694837	22.2085	45.5098	12.2271	18.7772	12.5119
1093	Chr1:158869847-158870569	37.4932	-0.499855	0.327949	-1.52419	0.127462	0.332166	48.8588	42.8328	34.6434	30.3325	30.7984
1094	Chr1:159031415-159031887	7.91848	-0.232202	0.537344	-0.432129	0.665648	0.823226	11.8446	5.3541	7.47211	7.22202	7.69961
1095	Chr1:159341743-159342094	14.8406	-0.0280805	0.458595	-0.0612316	0.951175	0.977703	16.2863	13.3852	19.0199	12.9996	12.5119
1096	Chr1:159342254-159342825	28.4484	-1.43758	0.35412	-4.0596	4.92e-05	0.00109216	48.8588	45.5098	15.6235	15.8884	16.3617
1097	Chr1:159490787-159491287	11.4968	0.239973	0.503635	0.476482	0.633731	0.804714	11.8446	8.03114	14.2649	7.94422	15.3992
1098	Chr1:160286061-160286568	17.0467	-0.332431	0.43938	-0.756593	0.449294	0.672366	29.6114	8.03114	16.3028	17.3328	13.9555
1099	Chr1:160292565-160293194	11.7301	0.515783	0.508868	1.01359	0.310779	0.550989	7.40285	10.7082	13.5857	10.1108	16.8429
1100	Chr1:161161649-161162345	36.9341	-0.559677	0.347835	-1.60903	0.10761	0.301338	63.6645	26.7705	28.5299	36.8323	28.8735
1101	Chr1:161162961-161163614	27.0046	0.681266	0.3943	1.72779	0.0840263	0.25987	19.2474	18.7393	29.8884	33.9435	33.2046
1102	Chr1:161743174-161743631	7.85	1.35128	0.588299	2.29693	0.021623	0.109691	4.44171	0	12.9064	12.2774	9.62451
1103	Chr1:161974596-161975142	9.41007	0.318713	0.528443	0.603116	0.546431	0.747271	11.8446	2.67705	10.8685	10.1108	11.5494
1104	Chr1:162075843-162076502	13.7182	0.665817	0.488431	1.36318	0.172827	0.396606	10.364	8.03114	16.9821	18.7772	14.4368
1105	Chr1:162125264-162126343	51.3668	-0.123517	0.300857	-0.41055	0.681403	0.832578	59.2228	48.1869	50.2669	49.1097	50.0475
1106	Chr1:162141444-162142566	101.087	0.884661	0.273725	3.23193	0.00122957	0.0141183	76.9896	50.8639	134.498	132.885	110.201
1107	Chr1:162836569-162837062	29.8221	-0.950796	0.36152	-2.63	0.00853857	0.0584846	34.0531	53.541	24.4542	15.8884	21.1739
1108	Chr1:162837123-162837799	29.3444	0.648649	0.390742	1.66004	0.0969055	0.28264	14.8057	29.4475	35.3227	29.6103	37.5356
1109	Chr1:162965093-162966093	97.6933	-1.34287	0.249974	-5.37206	7.78e-08	4.66e-06	155.46	155.269	63.1733	64.9982	49.5662
1110	Chr1:163000119-163000881	47.6139	-0.0618873	0.310883	-0.199069	0.842208	0.923854	56.2617	40.1557	47.5498	45.4987	48.6038
1111	Chr1:163001010-163002150	66.772	0.843801	0.310994	2.71324	0.00666285	0.0495449	34.0531	56.218	87.6275	88.1086	67.8528
1112	Chr1:163060575-163061718	67.1632	-0.0559634	0.277505	-0.201666	0.840178	0.922588	68.1062	69.6033	64.5319	68.6092	64.9654
1113	Chr1:163072705-163073163	10.7953	0.20454	0.509995	0.401064	0.688373	0.837325	8.88342	10.7082	8.15139	13.7218	12.5119
1114	Chr1:163100486-163101068	14.5137	-0.468013	0.45496	-1.02869	0.303625	0.54387	19.2474	16.0623	12.2271	15.8884	9.14328
1115	Chr1:163125725-163126404	11.1104	1.53476	0.558866	2.74621	0.00602889	0.0460334	5.92228	0	18.3406	18.7772	12.5119
1116	Chr1:163180070-163180650	29.025	1.0245	0.4053	2.52776	0.0114792	0.071705	13.3251	21.4164	31.9263	34.6657	43.7915
1117	Chr1:163808047-163808628	28.4585	1.19941	0.411531	2.91451	0.00356243	0.0316321	19.2474	8.03114	38.7191	41.1655	35.1295
1118	Chr1:163888668-163889133	7.63079	0.933097	0.577396	1.61604	0.106085	0.298209	2.96114	5.3541	11.5478	8.66642	9.62451
1119	Chr1:163899291-163900211	36.464	0.746987	0.361433	2.06673	0.0387593	0.160689	29.6114	18.7393	43.4741	49.1097	41.3854
1120	Chr1:164138986-164139528	6.06445	1.35315	0.612223	2.21022	0.0270896	0.126895	2.96114	0	8.83067	6.49982	12.0306
1121	Chr1:164407333-164407825	16.327	-0.09416	0.445337	-0.211435	0.832548	0.91841	17.7668	16.0623	12.9064	20.9439	13.9555
1122	Chr1:164407736-164408239	15.4123	0.270097	0.459261	0.588111	0.556458	0.754958	13.3251	13.3852	18.3406	18.055	13.9555
1123	Chr1:164477694-164478721	51.7722	0.478923	0.323549	1.48022	0.138814	0.349039	54.7811	24.0934	61.8147	61.3872	56.7846
1124	Chr1:164499953-164500368	29.538	0.758319	0.390974	1.93956	0.0524328	0.194832	20.728	18.7393	31.9263	44.0543	32.2421
1125	Chr1:164500136-164500710	36.8669	0.10512	0.340835	0.308419	0.757763	0.877362	31.092	40.1557	38.7191	36.8323	37.5356
1126	Chr1:164501298-164501846	26.2311	0.302819	0.385489	0.785544	0.432135	0.658693	23.6891	21.4164	28.5299	26.7215	30.7984
1127	Chr1:164669230-164669575	17.4133	0.975949	0.472836	2.06403	0.0390144	0.161407	7.40285	13.3852	17.6613	25.9993	22.6176
1128	Chr1:164669329-164670315	64.6802	0.1554	0.289486	0.536814	0.591396	0.777831	50.3394	72.2803	67.9283	69.3314	63.5218
1129	Chr1:164670069-164670761	45.1046	-1.13918	0.306495	-3.71679	0.000201773	0.00345509	69.5868	66.9262	31.247	31.7769	25.9862
1130	Chr1:165333062-165333665	36.8517	-0.00246307	0.344319	-0.00715345	0.994292	0.996866	42.9365	29.4475	31.247	44.0543	36.5731
1131	Chr1:165334036-165334627	21.9651	0.741124	0.426099	1.73932	0.0819779	0.255693	17.7668	10.7082	30.5677	26.7215	24.0613
1132	Chr1:165709761-165710237	17.6193	0.113	0.439991	0.256823	0.797315	0.899552	19.2474	13.3852	13.5857	23.1105	18.7678
1133	Chr1:165710064-165710565	18.6	0.910281	0.458606	1.98489	0.0471572	0.182385	13.3251	8.03114	20.3785	29.6103	21.6551
1134	Chr1:165860296-165861086	40.8493	-0.0452495	0.330332	-0.136982	0.891045	0.949306	34.0531	50.8639	42.7948	38.9989	37.5356
1135	Chr1:165924073-165924656	28.6068	0.479177	0.383744	1.24869	0.211779	0.444721	29.6114	13.3852	31.9263	35.3879	32.7233
1136	Chr1:165924520-165925052	32.1176	-0.674377	0.351981	-1.91595	0.0553717	0.201073	44.4171	40.1557	19.6992	24.5549	31.7609
1137	Chr1:165924900-165925758	47.561	0.339463	0.321534	1.05576	0.291077	0.532324	47.3782	32.1246	46.8705	55.6095	55.8222
1138	Chr1:166081793-166082245	12.415	1.02666	0.516164	1.98902	0.0466986	0.181254	7.40285	5.3541	15.6235	17.3328	16.3617
1139	Chr1:166179653-166180555	61.9445	1.02318	0.313648	3.26219	0.00110556	0.0130572	44.4171	26.7705	76.0797	83.0532	79.4022
1140	Chr1:166205651-166206294	22.4558	0.0967668	0.409911	0.236068	0.81338	0.90727	28.1308	13.3852	19.0199	22.3883	29.3548
1141	Chr1:166236543-166237502	59.4862	0.326708	0.299549	1.09067	0.27542	0.515711	53.3005	48.1869	64.5319	73.6646	57.7471
1142	Chr1:166237263-166237736	29.7658	0.119915	0.391388	0.306385	0.759311	0.878425	39.9754	13.3852	31.9263	40.4433	23.0988
1143	Chr1:166237741-166238428	34.5705	0.488484	0.357193	1.36756	0.171449	0.394803	29.6114	24.0934	38.0398	42.6099	38.498
1144	Chr1:166305847-166306319	28.6817	0.444094	0.378405	1.17359	0.240558	0.478036	22.2085	24.0934	32.6056	33.2213	31.2797
1145	Chr1:166306099-166306413	18.4583	0.747522	0.450485	1.65937	0.0970411	0.282778	13.3251	10.7082	24.4542	24.5549	19.249
1146	Chr1:166306364-166306821	20.604	0.556229	0.429748	1.29431	0.195557	0.42429	14.8057	16.0623	23.7749	28.1659	20.2115
1147	Chr1:166387087-166387510	19.9161	0.954756	0.448798	2.12736	0.0333899	0.145567	10.364	13.3852	26.492	26.7215	22.6176
1148	Chr1:166387779-166388247	33.143	-1.11972	0.352323	-3.17809	0.00148248	0.016433	39.9754	61.5721	24.4542	23.8327	15.8804
1149	Chr1:166424157-166424531	11.3902	-0.196091	0.489558	-0.400548	0.688753	0.837504	11.8446	13.3852	12.2271	9.38862	10.1057
1150	Chr1:166432809-166433792	35.9922	0.863834	0.367287	2.35193	0.0186762	0.0998807	22.2085	24.0934	40.757	50.5541	42.3478
1151	Chr1:166660119-166660634	4.88451	0.492331	0.608398	0.809224	0.418386	0.646742	5.92228	0	8.15139	5.05541	5.29348
1152	Chr1:166828954-166829614	18.5681	0.315101	0.431941	0.7295	0.465696	0.685577	17.7668	13.3852	21.737	18.7772	21.1739
1153	Chr1:166948931-166949568	16.3076	0.205652	0.457455	0.449558	0.653029	0.815475	22.2085	5.3541	14.2649	18.055	21.6551
1154	Chr1:167123589-167124369	41.4538	-0.0145858	0.327512	-0.0445353	0.964478	0.983129	47.3782	34.8016	46.8705	38.2767	39.9417
1155	Chr1:167124114-167124595	30.0422	-0.688747	0.357511	-1.9265	0.0540417	0.198265	37.0142	42.8328	29.2092	19.4995	21.6551
1156	Chr1:167124574-167125084	19.2964	0.896678	0.451428	1.98631	0.0469984	0.181987	16.2863	5.3541	23.0956	28.1659	23.58
1157	Chr1:167166173-167167137	54.3802	-0.366831	0.293431	-1.25015	0.211246	0.444002	69.5868	56.218	49.5876	45.4987	51.0099
1158	Chr1:167167154-167167772	28.1887	0.561449	0.384997	1.45832	0.144753	0.357985	25.1697	16.0623	33.2849	34.6657	31.7609
1159	Chr1:167211911-167212723	41.3733	-0.845762	0.323233	-2.61657	0.0088818	0.0602396	44.4171	72.2803	31.9263	28.8881	29.3548
1160	Chr1:167390651-167391207	32.6728	-0.533224	0.347546	-1.53426	0.124967	0.328427	45.8977	34.8016	32.6056	23.1105	26.9486
1161	Chr1:167391481-167392140	36.6192	0.0207373	0.342769	0.0604994	0.951758	0.977986	35.5337	37.4787	36.6813	31.0547	42.3478
1162	Chr1:167563581-167564360	39.7377	0.0941936	0.331237	0.284369	0.776128	0.888504	38.4948	37.4787	38.7191	44.0543	39.9417
1163	Chr1:167564720-167565188	22.3613	-0.109854	0.398525	-0.275652	0.782816	0.891777	29.6114	16.0623	23.7749	20.2217	22.1364
1164	Chr1:167571727-167572483	38.8224	-0.804734	0.324632	-2.47891	0.0131783	0.0786737	62.1839	42.8328	29.8884	31.7769	27.4299
1165	Chr1:167572493-167573169	50.4016	-0.965583	0.295391	-3.26883	0.00107992	0.0128349	79.9508	64.2492	34.6434	36.1101	37.0544
1166	Chr1:167637828-167638340	15.3134	-0.520784	0.446959	-1.16517	0.24395	0.481675	17.7668	21.4164	10.1892	10.833	16.3617
1167	Chr1:167693784-167694418	27.2603	-0.278955	0.368134	-0.757753	0.448599	0.671861	34.0531	26.7705	24.4542	27.4437	23.58
1168	Chr1:167694148-167694709	23.1625	0.0815022	0.398105	0.204725	0.837787	0.921375	20.728	24.0934	23.0956	26.7215	21.1739
1169	Chr1:167710732-167711219	7.27146	0.7023	0.572173	1.22743	0.219662	0.4542	5.92228	2.67705	10.1892	7.94422	9.62451
1170	Chr1:167719023-167719752	13.2869	1.00697	0.507052	1.98592	0.0470421	0.182091	10.364	2.67705	19.6992	17.3328	16.3617
1171	Chr1:167932304-167932812	30.0314	-1.12981	0.352371	-3.20631	0.00134448	0.0151925	41.456	50.8639	21.737	15.8884	20.2115
1172	Chr1:167933046-167933531	26.3035	-0.813664	0.373401	-2.17906	0.0293271	0.133774	47.3782	24.0934	21.0578	17.3328	21.6551
1173	Chr1:167978850-167979319	8.2121	1.41868	0.5874	2.41518	0.0157274	0.0890168	4.44171	0	10.8685	9.38862	16.3617
1174	Chr1:168184317-168184748	13.3162	-0.362607	0.475667	-0.762313	0.445874	0.670168	8.88342	24.0934	12.9064	10.1108	10.587
1175	Chr1:168239156-168239619	17.0879	-0.651705	0.42981	-1.51626	0.129453	0.335025	19.2474	26.7705	12.2271	10.833	16.3617
1176	Chr1:168309521-168310012	21.2256	-0.610862	0.409095	-1.4932	0.135384	0.343924	19.2474	37.4787	14.2649	14.444	20.6927
1177	Chr1:168309761-168310144	16.1262	-0.609886	0.436522	-1.39715	0.162369	0.382544	20.728	21.4164	15.6235	9.38862	13.4743
1178	Chr1:168309890-168310347	15.2939	0.0701153	0.460577	0.152234	0.879003	0.94298	22.2085	5.3541	18.3406	16.6106	13.9555
1179	Chr1:169213779-169214637	59.5875	-0.6611	0.283239	-2.33407	0.0195921	0.102846	72.5479	82.9885	50.9462	43.3321	48.1226
1180	Chr1:169237670-169238231	25.1441	0.315478	0.39175	0.805305	0.420644	0.648821	23.6891	18.7393	26.492	30.3325	26.4674
1181	Chr1:169238802-169239787	50.9254	0.523524	0.324444	1.6136	0.106614	0.299218	51.8199	24.0934	59.0976	62.8316	56.7846
1182	Chr1:169279971-169280449	25.1923	-0.80187	0.37578	-2.13388	0.0328526	0.144083	37.0142	32.1246	14.9442	23.1105	18.7678
1183	Chr1:169280219-169280929	36.1153	-0.117298	0.340313	-0.344678	0.730337	0.862883	34.0531	42.8328	31.247	38.2767	34.167
1184	Chr1:169280681-169281353	22.8313	1.13505	0.439563	2.58223	0.00981638	0.0645116	14.8057	8.03114	25.1335	35.3879	30.7984
1185	Chr1:169323497-169324055	30.1319	0.36889	0.369639	0.997973	0.318292	0.557746	28.1308	21.4164	33.9641	33.9435	33.2046
1186	Chr1:169323872-169324360	38.802	0.0596343	0.34108	0.17484	0.861206	0.934295	48.8588	24.0934	42.1155	41.8877	37.0544
1187	Chr1:169324142-169324644	38.4164	-0.627086	0.332957	-1.88338	0.0596484	0.211139	62.1839	34.8016	33.9641	33.2213	27.9111
1188	Chr1:169528358-169528879	10.2227	1.39786	0.561293	2.49042	0.0127592	0.0769243	4.44171	2.67705	12.2271	12.9996	18.7678
1189	Chr1:169732950-169733450	11.301	0.835771	0.522981	1.59809	0.110023	0.304998	5.92228	8.03114	12.2271	14.444	15.8804
1190	Chr1:169818599-169819085	9.63185	0.744487	0.548024	1.35849	0.174307	0.398456	4.44171	8.03114	14.2649	13.7218	7.69961
1191	Chr1:170287616-170288319	16.6137	0.849186	0.471473	1.80113	0.071682	0.235723	11.8446	8.03114	16.9821	25.9993	20.2115
1192	Chr1:170360887-170361336	12.082	1.40043	0.539452	2.59602	0.00943102	0.0626862	5.92228	2.67705	14.2649	20.2217	17.3241
1193	Chr1:170361782-170362312	15.2756	-0.169735	0.45638	-0.371916	0.709956	0.850294	23.6891	8.03114	16.9821	10.833	16.8429
1194	Chr1:170639463-170639895	5.99596	0.501639	0.59467	0.843558	0.398916	0.629872	1.48057	8.03114	7.47211	5.77761	7.21838
1195	Chr1:171461180-171461707	18.9387	-0.538948	0.410279	-1.31361	0.188976	0.416394	23.6891	24.0934	15.6235	15.8884	15.3992
1196	Chr1:171461639-171462364	29.1683	1.04264	0.403739	2.58247	0.00980962	0.0645003	20.728	10.7082	40.757	41.8877	31.7609
1197	Chr1:171898883-171899213	12.5576	0.432557	0.491667	0.879778	0.37898	0.61232	13.3251	5.3541	14.2649	15.8884	13.9555
1198	Chr1:171898960-171899435	17.4619	-0.422896	0.425885	-0.992982	0.320719	0.559968	25.1697	16.0623	13.5857	18.055	14.4368
1199	Chr1:172104646-172105213	22.7829	-1.52073	0.39793	-3.82159	0.000132593	0.00244363	28.1308	50.8639	14.9442	9.38862	10.587
1200	Chr1:172105196-172105690	14.5559	0.127346	0.463091	0.274991	0.783323	0.891898	11.8446	16.0623	13.5857	14.444	16.8429
1201	Chr1:172144635-172145240	15.9739	1.01335	0.484231	2.09271	0.0363749	0.154019	7.40285	10.7082	24.4542	18.055	19.249
1202	Chr1:172701601-172702058	5.29789	0.397977	0.604602	0.658247	0.51038	0.719394	2.96114	5.3541	9.50996	4.33321	4.33103
1203	Chr1:172797485-172797976	30.5136	-0.2495	0.356211	-0.700427	0.483661	0.699562	31.092	37.4787	30.5677	27.4437	25.9862
1204	Chr1:172798177-172798834	34.2053	1.34514	0.404383	3.3264	0.000879768	0.0109244	23.6891	5.3541	46.1912	56.3317	39.4605
1205	Chr1:172798735-172799180	18.7854	0.66765	0.445879	1.49738	0.134294	0.34231	14.8057	10.7082	25.8127	23.8327	18.7678
1206	Chr1:172814656-172815280	27.773	-0.010289	0.370287	-0.0277864	0.977832	0.989429	26.6503	29.4475	27.1713	28.1659	27.4299
1207	Chr1:172815153-172815690	26.5829	-1.07192	0.375093	-2.85774	0.00426672	0.0360015	28.1308	53.541	15.6235	17.3328	18.2866
1208	Chr1:172963371-172964129	33.3583	0.630824	0.374288	1.6854	0.0919123	0.273178	32.5725	13.3852	38.0398	46.2209	36.5731
1209	Chr1:173031964-173032574	25.8108	-0.904323	0.367399	-2.46142	0.0138389	0.081347	38.4948	34.8016	20.3785	18.055	17.3241
1210	Chr1:173041202-173041757	27.9369	-1.0723	0.36157	-2.96568	0.00302016	0.02785	45.8977	37.4787	23.0956	15.8884	17.3241
1211	Chr1:173041568-173042454	38.6112	0.189804	0.349193	0.543551	0.58675	0.774518	48.8588	18.7393	44.8327	39.7211	40.9042
1212	Chr1:173079905-173080851	49.3191	-0.499614	0.304285	-1.64193	0.100605	0.288675	71.0673	48.1869	45.5119	41.8877	39.9417
1213	Chr1:173125736-173126173	7.95209	1.05385	0.575452	1.83135	0.0670487	0.226309	4.44171	2.67705	12.9064	10.1108	9.62451
1214	Chr1:173126039-173126571	24.077	-1.64613	0.377597	-4.35949	1.3e-05	0.000358705	44.4171	40.1557	12.2271	10.1108	13.4743
1215	Chr1:173176529-173177373	53.2141	-0.183318	0.298747	-0.613622	0.539465	0.742384	56.2617	58.8951	49.5876	55.6095	45.7164
1216	Chr1:173177420-173177947	18.5212	1.03682	0.46748	2.21788	0.0265629	0.125385	5.92228	16.0623	25.1335	23.8327	21.6551
1217	Chr1:173199697-173200260	22.6318	0.950288	0.432179	2.19883	0.02789	0.1294	13.3251	13.3852	29.8884	32.4991	24.0613
1218	Chr1:173200036-173200527	25.6893	-0.154761	0.380426	-0.40681	0.684147	0.83488	23.6891	32.1246	23.7749	26.7215	22.1364
1219	Chr1:173200921-173201259	14.1334	0.489053	0.479265	1.02042	0.307528	0.548146	8.88342	13.3852	14.9442	18.055	15.3992
1220	Chr1:173210390-173210929	17.0609	0.547437	0.627886	0.871873	0.383278	0.615989	20.728	0	21.737	20.2217	22.6176
1221	Chr1:173210728-173211282	20.281	0.354652	0.423001	0.838418	0.401796	0.632198	17.7668	16.0623	23.7749	18.7772	25.0237
1222	Chr1:173211382-173211868	19.2615	-0.072757	0.421479	-0.172623	0.862948	0.935371	25.1697	13.3852	23.0956	17.3328	17.3241
1223	Chr1:173217323-173218134	39.5423	-1.09564	0.324188	-3.37964	0.000725808	0.00932536	69.5868	48.1869	22.4163	29.6103	27.9111
1224	Chr1:173223972-173224796	39.6928	-0.0662947	0.327266	-0.202571	0.83947	0.922355	41.456	40.1557	40.0777	38.2767	38.498
1225	Chr1:173224521-173224880	21.3016	-0.971039	0.401421	-2.419	0.0155631	0.0883405	23.6891	40.1557	14.2649	11.5552	16.8429
1226	Chr1:173224600-173225174	35.2836	-0.776092	0.338798	-2.29073	0.0219792	0.110835	38.4948	58.8951	29.2092	23.8327	25.9862
1227	Chr1:173250480-173251018	15.8394	0.637426	0.473786	1.34539	0.1785	0.403659	7.40285	16.0623	16.9821	22.3883	16.3617
1228	Chr1:173258552-173259166	22.8115	0.937862	0.427956	2.19149	0.0284162	0.131089	17.7668	8.03114	27.8506	29.6103	30.7984
1229	Chr1:173260139-173260854	27.137	0.691999	0.394784	1.75286	0.0796268	0.251052	19.2474	18.7393	34.6434	28.8881	34.167
1230	Chr1:173275191-173275676	21.3192	0.532598	0.422497	1.2606	0.207454	0.438913	16.2863	16.0623	21.0578	28.1659	25.0237
1231	Chr1:173275671-173276411	44.2262	-0.63471	0.320917	-1.9778	0.0479511	0.184439	48.8588	66.9262	27.8506	36.1101	41.3854
1232	Chr1:173290938-173291493	17.7211	0.566441	0.453684	1.24854	0.211834	0.444799	8.88342	18.7393	17.6613	21.6661	21.6551
1233	Chr1:173342371-173342853	11.9091	1.1463	0.52792	2.17136	0.0299042	0.135633	5.92228	5.3541	16.9821	14.444	16.8429
1234	Chr1:173367859-173368336	25.1374	0.0363436	0.384919	0.0944188	0.924777	0.965995	25.1697	24.0934	28.5299	23.8327	24.0613
1235	Chr1:173368136-173368597	21.4698	0.763988	0.429691	1.77799	0.0754048	0.243341	14.8057	13.3852	27.1713	28.8881	23.0988
1236	Chr1:173408158-173408697	18.9953	-0.487821	0.413228	-1.18051	0.237796	0.474943	20.728	26.7705	14.2649	17.3328	15.8804
1237	Chr1:173939679-173940099	7.31456	0.55536	0.570306	0.973792	0.33016	0.568279	8.88342	0	7.47211	11.5552	8.66206
1238	Chr1:173956432-173957067	22.6572	-0.489635	0.40275	-1.21573	0.224087	0.459659	38.4948	16.0623	19.0199	15.1662	24.5425
1239	Chr1:173984007-173984409	9.5471	0.628545	0.535803	1.17309	0.24076	0.478263	7.40285	5.3541	10.1892	12.2774	12.5119
1240	Chr1:174012121-174012751	37.9894	0.155482	0.346555	0.448651	0.653683	0.815894	44.4171	24.0934	47.5498	36.8323	37.0544
1241	Chr1:174013206-174013819	28.0964	0.432998	0.400618	1.08083	0.279774	0.52044	34.0531	8.03114	31.247	39.7211	27.4299
1242	Chr1:174056997-174057857	37.4408	0.791655	0.359403	2.20269	0.0276163	0.12865	23.6891	26.7705	41.4362	50.5541	44.754
1243	Chr1:174077703-174078211	23.3863	-0.0193251	0.39561	-0.0488489	0.96104	0.981913	29.6114	16.0623	26.492	23.1105	21.6551
1244	Chr1:174136187-174137007	22.4168	0.139925	0.403761	0.346553	0.728927	0.862157	20.728	21.4164	24.4542	19.4995	25.9862
1245	Chr1:174256357-174256917	18.3442	0.0498359	0.428946	0.116182	0.907508	0.95716	19.2474	16.0623	17.6613	22.3883	16.3617
1246	Chr1:174270816-174271288	12.9887	0.0607727	0.476217	0.127615	0.898453	0.953464	16.2863	8.03114	12.2271	12.9996	15.3992
1247	Chr1:174271187-174271640	8.86739	0.766647	0.55064	1.39228	0.163836	0.384868	7.40285	2.67705	10.1892	12.9996	11.0682
1248	Chr1:174299057-174299664	11.7721	0.846246	0.524454	1.61358	0.106619	0.299218	4.44171	10.7082	12.9064	11.5552	19.249
1249	Chr1:174305925-174306537	20.0184	1.03048	0.452997	2.2748	0.0229179	0.113876	13.3251	8.03114	22.4163	31.7769	24.5425
1250	Chr1:174306673-174307105	21.085	-0.94001	0.401937	-2.3387	0.019351	0.102124	22.2085	40.1557	15.6235	14.444	12.9931
1251	Chr1:174307448-174307852	14.4969	0.75946	0.484314	1.56811	0.116855	0.315866	10.364	8.03114	16.3028	20.9439	16.8429
1252	Chr1:174385675-174386147	7.27281	0.939441	0.580176	1.61923	0.105397	0.296993	4.44171	2.67705	9.50996	10.1108	9.62451
1253	Chr1:174411767-174412292	15.7819	0.213913	0.451298	0.473996	0.635503	0.806022	14.8057	13.3852	16.3028	16.6106	17.8053
1254	Chr1:174412332-174412847	12.0726	0.770463	0.517177	1.48975	0.136291	0.345309	13.3251	0	13.5857	13.7218	19.7302
1255	Chr1:174420317-174420809	10.4895	0.0626507	0.504818	0.124105	0.901232	0.954772	11.8446	8.03114	10.1892	10.833	11.5494
1256	Chr1:174429958-174430430	19.3202	-0.220075	0.42755	-0.514735	0.606738	0.787973	32.5725	8.03114	20.3785	15.8884	19.7302
1257	Chr1:174430499-174430956	21.1285	-0.392526	0.405559	-0.967862	0.333113	0.571099	19.2474	32.1246	21.0578	15.8884	17.3241
1258	Chr1:174450795-174451279	15.6375	-0.277115	0.454437	-0.609798	0.541996	0.744357	28.1308	5.3541	16.3028	14.444	13.9555
1259	Chr1:174480500-174480983	12.0205	0.511291	0.500773	1.021	0.307253	0.547905	11.8446	5.3541	14.2649	12.2774	16.3617
1260	Chr1:174493094-174493653	23.4355	0.100865	0.394357	0.255771	0.798128	0.900094	25.1697	18.7393	25.1335	24.5549	23.58
1261	Chr1:174493494-174493963	11.2662	1.05946	0.533429	1.98613	0.0470188	0.182028	5.92228	5.3541	18.3406	12.2774	14.4368
1262	Chr1:175297302-175297864	16.525	-0.149973	0.441473	-0.33971	0.734075	0.864588	14.8057	21.4164	12.2271	17.3328	16.8429
1263	Chr1:175350621-175351122	9.81367	1.77504	0.589119	3.01304	0.00258641	0.0249484	0	5.3541	12.9064	18.7772	12.0306
1264	Chr1:176431859-176432331	17.836	-0.177439	0.425799	-0.416721	0.676882	0.829809	17.7668	21.4164	16.3028	15.8884	17.8053
1265	Chr1:176432358-176432670	10.5822	0.173706	0.513302	0.338409	0.735055	0.865214	8.88342	10.7082	13.5857	7.22202	12.5119
1266	Chr1:176432414-176432862	16.0667	0.0484174	0.447106	0.108291	0.913765	0.959721	13.3251	18.7393	16.9821	14.444	16.8429
1267	Chr1:176851569-176852041	8.86624	0.56627	0.556117	1.01826	0.308556	0.548833	2.96114	10.7082	6.11354	11.5552	12.9931
1268	Chr1:177422061-177422552	15.618	-0.0513607	0.454504	-0.113004	0.910027	0.958439	11.8446	21.4164	14.2649	12.2774	18.2866
1269	Chr1:177422722-177423105	8.85514	0.0903205	0.533241	0.16938	0.865498	0.936492	8.88342	8.03114	8.83067	6.49982	12.0306
1270	Chr1:177554803-177555842	52.1365	-0.34184	0.303689	-1.12562	0.260324	0.49963	54.7811	66.9262	44.1534	40.4433	54.3785
1271	Chr1:177622155-177622930	38.3657	-1.13157	0.329768	-3.4314	0.000600466	0.00806614	60.7034	56.218	25.8127	18.7772	30.3172
1272	Chr1:177623086-177623542	11.9713	0.625125	0.516646	1.20997	0.226291	0.462434	4.44171	13.3852	12.9064	18.055	11.0682
1273	Chr1:177810539-177811014	22.0712	-0.139637	0.397194	-0.35156	0.725169	0.859831	25.1697	21.4164	23.0956	20.9439	19.7302
1274	Chr1:177810824-177811552	35.1483	0.119468	0.346088	0.345195	0.729948	0.862583	34.0531	32.1246	37.3605	38.9989	33.2046
1275	Chr1:178743661-178744351	45.0474	-1.14421	0.310913	-3.68017	0.000233083	0.00385467	60.7034	77.6344	26.492	26.7215	33.6858
1276	Chr1:178744421-178744905	20.2812	-0.115521	0.415212	-0.278222	0.780842	0.890963	28.1308	13.3852	19.6992	16.6106	23.58
1277	Chr1:179187030-179187814	35.3691	0.209473	0.357613	0.585752	0.558042	0.755891	38.4948	24.0934	46.8705	30.3325	37.0544
1278	Chr1:179252882-179253443	16.4078	0.411567	0.463506	0.887945	0.37457	0.608916	8.88342	18.7393	14.9442	23.1105	16.3617
1279	Chr1:179268782-179269312	17.0118	-0.126926	0.457525	-0.277419	0.781458	0.891181	8.88342	29.4475	10.8685	16.6106	19.249
1280	Chr1:179371379-179372116	27.9975	-0.183491	0.366503	-0.500654	0.616614	0.793873	35.5337	24.0934	27.1713	26.7215	26.4674
1281	Chr1:179632606-179633240	8.7607	0.838336	0.560724	1.49509	0.13489	0.343213	2.96114	8.03114	10.1892	8.66642	13.9555
1282	Chr1:179725195-179725764	29.9452	1.12566	0.39884	2.82234	0.00476748	0.0388697	16.2863	16.0623	39.3984	40.4433	37.5356
1283	Chr1:179725739-179726773	74.2202	-0.549734	0.267753	-2.05314	0.0400593	0.164183	88.8342	96.3737	59.7769	69.3314	56.7846
1284	Chr1:180118719-180119222	10.5317	1.1611	0.545639	2.12796	0.0333405	0.145471	4.44171	5.3541	14.9442	14.444	13.4743
1285	Chr1:180205895-180206455	12.5957	0.309473	0.488361	0.633697	0.526279	0.73262	14.8057	5.3541	15.6235	12.2774	14.918
1286	Chr1:180249272-180249753	32.7641	-0.702451	0.345173	-2.03507	0.0418441	0.168753	37.0142	50.8639	28.5299	23.8327	23.58
1287	Chr1:180249508-180250019	36.4054	-0.132982	0.347632	-0.382538	0.702063	0.84572	32.5725	45.5098	38.7191	38.2767	26.9486
1288	Chr1:180265566-180266119	52.6113	0.591119	0.32805	1.80192	0.0715586	0.235468	42.9365	34.8016	53.6633	78.72	52.9348
1289	Chr1:180265862-180266320	42.8558	0.361435	0.331557	1.09012	0.275662	0.515862	37.0142	34.8016	46.1912	53.4429	42.8291
1290	Chr1:180290041-180290513	11.0645	0.512652	0.526846	0.973058	0.330525	0.568606	4.44171	13.3852	12.2271	7.94422	17.3241
1291	Chr1:180298694-180299218	22.8537	0.0891133	0.399281	0.223184	0.823392	0.912872	26.6503	16.0623	21.737	23.8327	25.9862
1292	Chr1:180299035-180299660	32.1098	0.0145151	0.358076	0.0405364	0.967665	0.984069	25.1697	40.1557	31.9263	32.4991	30.7984
1293	Chr1:180335708-180336587	48.5727	-0.937183	0.297707	-3.14801	0.00164389	0.0177911	66.6256	72.2803	34.6434	34.6657	34.6482
1294	Chr1:180336563-180337155	27.6136	-0.535765	0.367739	-1.45692	0.14514	0.358441	29.6114	40.1557	23.7749	25.2771	19.249
1295	Chr1:181447032-181447678	25.7453	0.650321	0.407855	1.59449	0.110826	0.306008	22.2085	13.3852	23.0956	36.8323	33.2046
1296	Chr1:181448116-181448573	13.1625	0.194397	0.480211	0.404816	0.685612	0.835318	14.8057	8.03114	16.9821	14.444	11.5494
1297	Chr1:181475307-181476112	38.9859	0.981044	0.364097	2.69446	0.00705036	0.0514439	26.6503	18.7393	52.3048	54.8873	42.3478
1298	Chr1:181476477-181477060	33.0636	-0.751713	0.339426	-2.21466	0.0267836	0.126101	41.456	48.1869	25.1335	25.9993	24.5425
1299	Chr1:181477005-181477467	20.1721	0.555697	0.430495	1.29083	0.196762	0.425642	16.2863	13.3852	23.7749	26.7215	20.6927
1300	Chr1:181598165-181598808	33.655	-1.02214	0.354892	-2.88015	0.0039749	0.034238	34.0531	66.9262	24.4542	24.5549	18.2866
1301	Chr1:181598706-181599207	12.9722	0.527979	0.490812	1.07573	0.282049	0.523114	8.88342	10.7082	14.9442	15.8884	14.4368
1302	Chr1:181732015-181732665	30.8353	0.612735	0.382357	1.60252	0.109041	0.30332	29.6114	13.3852	34.6434	43.3321	33.2046
1303	Chr1:181732510-181733259	51.806	-0.245636	0.300984	-0.81611	0.414437	0.643706	56.2617	58.8951	54.3426	44.7765	44.754
1304	Chr1:181733387-181733909	34.9846	-1.94466	0.338399	-5.74664	9.1e-09	7.55e-07	57.7422	72.2803	16.9821	14.444	13.4743
1305	Chr1:181733977-181734460	18.6929	1.00186	0.459938	2.17825	0.0293871	0.134	10.364	10.7082	23.7749	27.4437	21.1739
1306	Chr1:181778119-181778625	10.0514	0.374001	0.522936	0.715195	0.474489	0.692828	10.364	5.3541	9.50996	10.1108	14.918
1307	Chr1:181889381-181889829	16.8764	-0.34414	0.432165	-0.796318	0.425847	0.653329	20.728	18.7393	12.9064	13.7218	18.2866
1308	Chr1:181889983-181890744	38.4463	-1.83674	0.344238	-5.33566	9.52e-08	5.53e-06	50.3394	91.0196	17.6613	12.9996	20.2115
1309	Chr1:182125561-182126451	49.9806	-1.59177	0.298683	-5.32928	9.86e-08	5.69e-06	94.7565	74.9573	29.8884	25.2771	25.0237
1310	Chr1:182144964-182145421	7.19485	-0.406484	0.551693	-0.736794	0.461247	0.681899	7.40285	10.7082	6.79283	4.33321	6.73716
1311	Chr1:182156059-182156567	17.7364	-0.0065736	0.435872	-0.0150815	0.987967	0.993903	23.6891	10.7082	16.9821	15.1662	22.1364
1312	Chr1:182185521-182186429	37.149	-0.287585	0.334929	-0.858642	0.390538	0.622668	37.0142	48.1869	35.3227	29.6103	35.6107
1313	Chr1:182186406-182186887	17.653	-0.0266247	0.430132	-0.0618989	0.950643	0.977546	19.2474	16.0623	19.0199	18.055	15.8804
1314	Chr1:182243723-182244221	6.3449	1.40464	0.608931	2.30673	0.0210699	0.107777	2.96114	0	9.50996	8.66642	10.587
1315	Chr1:182260559-182261084	13.5705	1.14897	0.513296	2.23841	0.0251945	0.121158	7.40285	5.3541	15.6235	23.1105	16.3617
1316	Chr1:182295385-182295917	23.4716	-0.0351619	0.400515	-0.0877916	0.930042	0.968262	32.5725	13.3852	20.3785	23.1105	27.9111
1317	Chr1:182305187-182305639	6.72438	0.0428898	0.567481	0.0755792	0.939754	0.972752	7.40285	5.3541	8.83067	7.22202	4.81226
1318	Chr1:182317096-182317737	18.2523	0.582998	0.447073	1.30403	0.192223	0.420301	13.3251	13.3852	18.3406	25.9993	20.2115
1319	Chr1:182413168-182413741	15.4271	0.820857	0.480907	1.70689	0.087842	0.266023	8.88342	10.7082	14.9442	22.3883	20.2115
1320	Chr1:182498955-182499487	38.958	-0.776798	0.3222	-2.41092	0.0159123	0.0896771	59.2228	45.5098	29.8884	31.7769	28.3923
1321	Chr1:182499511-182500017	28.8918	0.327947	0.374742	0.875127	0.381505	0.614578	25.1697	24.0934	28.5299	32.4991	34.167
1322	Chr1:182571377-182572147	63.8118	-1.1732	0.27772	-4.2244	2.4e-05	0.000608868	96.237	99.0508	44.8327	34.6657	44.2727
1323	Chr1:182626806-182627479	25.4513	-0.585308	0.375211	-1.55994	0.118774	0.318803	28.1308	37.4787	22.4163	20.9439	18.2866
1324	Chr1:182656087-182656621	34.2102	-1.22749	0.346113	-3.54651	0.000390365	0.00572737	41.456	66.9262	17.6613	25.2771	19.7302
1325	Chr1:182656375-182656826	31.5798	-0.687765	0.351906	-1.9544	0.0506542	0.190713	38.4948	45.5098	19.0199	28.8881	25.9862
1326	Chr1:182656572-182657216	31.9405	-0.00180655	0.355368	-0.0050836	0.995944	0.997759	34.0531	29.4475	27.8506	34.6657	33.6858
1327	Chr1:182698088-182698856	42.3855	-0.277908	0.319193	-0.870657	0.383941	0.616564	42.9365	53.541	39.3984	36.1101	39.9417
1328	Chr1:182707803-182708808	58.0768	-0.164355	0.289956	-0.566829	0.570831	0.76444	60.7034	64.2492	59.7769	51.2763	54.3785
1329	Chr1:182723811-182724458	17.9133	0.0539125	0.438153	0.123045	0.902072	0.954995	25.1697	8.03114	18.3406	15.8884	22.1364
1330	Chr1:182724326-182724806	11.9071	0.495046	0.503017	0.984154	0.32504	0.563793	11.8446	5.3541	15.6235	10.833	15.8804
1331	Chr1:182742576-182743235	42.4403	-0.109719	0.32089	-0.341922	0.73241	0.863727	50.3394	37.4787	42.7948	41.1655	40.4229
1332	Chr1:182744157-182744704	44.2056	-0.873394	0.315063	-2.77213	0.00556909	0.0434447	50.3394	74.9573	35.3227	29.6103	30.7984
1333	Chr1:182780688-182781223	40.6887	-2.33392	0.34188	-6.82671	8.69e-12	1.47e-09	106.601	53.541	15.6235	15.1662	12.5119
1334	Chr1:182781133-182781642	41.3193	-1.00842	0.315564	-3.1956	0.00139539	0.0156436	54.7811	66.9262	27.8506	26.7215	30.3172
1335	Chr1:182781343-182782200	66.981	0.553417	0.291763	1.89681	0.0578535	0.206756	51.8199	50.8639	80.8346	81.6088	69.7777
1336	Chr1:182834328-182834831	36.1544	-1.29564	0.335032	-3.86721	0.000110086	0.00209984	71.0673	42.8328	19.6992	24.5549	22.6176
1337	Chr1:182834704-182835203	33.1007	0.109755	0.354061	0.309989	0.756569	0.876692	31.092	32.1246	30.5677	33.2213	38.498
1338	Chr1:182872692-182873136	18.6761	-0.345004	0.415681	-0.829973	0.406554	0.63644	22.2085	21.4164	16.3028	15.1662	18.2866
1339	Chr1:182946776-182947232	16.2113	0.816286	0.469641	1.73811	0.0821923	0.255964	11.8446	8.03114	18.3406	21.6661	21.1739
1340	Chr1:182946996-182947457	19.8768	0.32587	0.428254	0.760927	0.446701	0.6707	23.6891	8.03114	22.4163	24.5549	20.6927
1341	Chr1:182947304-182947774	17.9631	0.138075	0.437001	0.315961	0.752032	0.87452	23.6891	8.03114	17.6613	21.6661	18.7678
1342	Chr1:183073478-183074433	63.0949	0.0227613	0.292618	0.0777849	0.937999	0.972018	56.2617	69.6033	73.3625	61.3872	54.8597
1343	Chr1:183074445-183075144	48.0504	0.634547	0.333402	1.90325	0.0570083	0.204765	31.092	40.1557	60.4562	62.8316	45.7164
1344	Chr1:183075102-183075510	20.6867	1.20605	0.453441	2.65978	0.00781924	0.0551654	11.8446	8.03114	29.8884	25.2771	28.3923
1345	Chr1:183080998-183082098	59.2097	-0.255232	0.285612	-0.893634	0.371518	0.606004	65.1451	66.9262	52.3048	56.3317	55.3409
1346	Chr1:183141705-183142235	31.0121	-1.83289	0.370018	-4.95353	7.29e-07	3.1e-05	37.0142	77.6344	15.6235	10.833	13.9555
1347	Chr1:183142227-183142706	24.5306	-0.573453	0.378858	-1.51364	0.130118	0.336071	28.1308	34.8016	22.4163	18.055	19.249
1348	Chr1:183142450-183142882	17.573	0.164763	0.435716	0.378142	0.705325	0.8478	16.2863	16.0623	20.3785	17.3328	17.8053
1349	Chr1:183186840-183187342	12.8926	0.528919	0.49527	1.06794	0.285548	0.526704	14.8057	2.67705	18.3406	13.7218	14.918
1350	Chr1:183771575-183772231	44.0408	-0.339121	0.320115	-1.05937	0.289429	0.530465	53.3005	48.1869	44.8327	31.0547	42.8291
1351	Chr1:183772056-183772658	41.524	-1.50093	0.321366	-4.67047	3.01e-06	0.000104506	62.1839	77.6344	27.8506	18.7772	21.1739
1352	Chr1:183783304-183783740	9.80959	0.256798	0.520315	0.493542	0.621629	0.79674	8.88342	8.03114	9.50996	11.5552	11.0682
1353	Chr1:183811174-183811986	17.7973	1.09919	0.473117	2.32329	0.0201635	0.104865	10.364	8.03114	21.737	19.4995	29.3548
1354	Chr1:183948020-183948468	25.0974	1.78946	0.460623	3.88486	0.000102389	0.00198103	11.8446	2.67705	38.0398	39.7211	33.2046
1355	Chr1:183948329-183949155	60.3551	1.0844	0.322026	3.36742	0.000758746	0.00964606	44.4171	21.4164	82.8725	79.4422	73.6275
1356	Chr1:183958544-183958945	18.2788	1.4007	0.483125	2.89925	0.00374057	0.0327485	7.40285	8.03114	24.4542	28.8881	22.6176
1357	Chr1:184054938-184055476	32.1408	-0.842255	0.346948	-2.42761	0.0151986	0.0869459	41.456	48.1869	25.8127	25.9993	19.249
1358	Chr1:184055290-184056027	38.8036	0.0090452	0.344946	0.0262221	0.97908	0.989822	41.456	34.8016	44.8327	44.0543	28.8735
1359	Chr1:184211548-184212457	55.5801	0.118918	0.302888	0.392614	0.694604	0.840961	56.2617	48.1869	50.9462	67.1648	55.3409
1360	Chr1:184212170-184213051	64.0545	-1.04431	0.274533	-3.80395	0.000142407	0.00259279	87.3536	101.728	45.5119	41.8877	43.7915
1361	Chr1:184270703-184271060	14.7552	0.199585	0.461512	0.432459	0.665407	0.823192	13.3251	13.3852	16.9821	13.7218	16.3617
1362	Chr1:184271155-184271835	39.6594	-1.36918	0.332349	-4.1197	3.79e-05	0.000883484	47.3782	82.9885	25.8127	20.9439	21.1739
1363	Chr1:184338470-184339161	36.7873	-0.30513	0.341571	-0.893314	0.371689	0.606237	54.7811	26.7705	36.6813	32.4991	33.2046
1364	Chr1:184339212-184339762	33.2959	-1.1561	0.348391	-3.3184	0.000905348	0.0111716	37.0142	66.9262	19.6992	21.6661	21.1739
1365	Chr1:184339514-184340182	37.344	-0.155955	0.339852	-0.45889	0.646313	0.811518	31.092	50.8639	33.2849	33.9435	37.5356
1366	Chr1:184391962-184392431	7.73929	0.0546087	0.560295	0.0974642	0.922358	0.964646	2.96114	13.3852	8.15139	5.05541	9.14328
1367	Chr1:184446806-184447571	32.9494	-0.144565	0.351733	-0.411006	0.681068	0.832391	39.9754	29.4475	26.492	33.2213	35.6107
1368	Chr1:184447449-184447795	15.784	-0.711584	0.43475	-1.63677	0.101679	0.290639	23.6891	18.7393	12.9064	10.1108	13.4743
1369	Chr1:184458471-184458954	9.52854	0.564052	0.53527	1.05377	0.291988	0.533551	5.92228	8.03114	11.5478	10.1108	12.0306
1370	Chr1:184469256-184469768	9.06434	0.481754	0.538987	0.893812	0.371422	0.605918	5.92228	8.03114	10.1892	10.1108	11.0682
1371	Chr1:184515460-184516060	10.5216	0.144373	0.512181	0.28188	0.778036	0.889258	13.3251	5.3541	11.5478	7.94422	14.4368
1372	Chr1:184694383-184694892	23.7636	-0.187489	0.387615	-0.483698	0.6286	0.801456	29.6114	21.4164	20.3785	22.3883	25.0237
1373	Chr1:184913259-184913866	10.8921	0.931545	0.539789	1.72576	0.0843909	0.260387	4.44171	8.03114	13.5857	18.7772	9.62451
1374	Chr1:186556520-186556976	17.6367	0.136288	0.436023	0.31257	0.754607	0.875488	14.8057	18.7393	19.0199	15.8884	19.7302
1375	Chr1:186634427-186634834	7.83387	0.595495	0.560347	1.06273	0.287906	0.529114	7.40285	2.67705	8.15139	9.38862	11.5494
1376	Chr1:186668973-186669843	51.4703	-0.522095	0.296227	-1.76248	0.0779878	0.248176	60.7034	66.9262	42.1155	46.2209	41.3854
1377	Chr1:186706334-186707130	40.4821	-0.685329	0.320858	-2.13593	0.0326853	0.143725	45.8977	61.5721	32.6056	32.4991	29.836
1378	Chr1:186743032-186743547	6.67585	0.183912	0.572376	0.321314	0.747972	0.87199	4.44171	8.03114	8.15139	5.05541	7.69961
1379	Chr1:186823767-186824187	9.69928	-0.222849	0.519814	-0.428709	0.668135	0.824608	8.88342	13.3852	11.5478	5.05541	9.62451
1380	Chr1:187027973-187028557	30.0518	-0.473631	0.354564	-1.33581	0.18161	0.407631	38.4948	34.8016	23.7749	23.8327	29.3548
1381	Chr1:187028403-187028919	22.5172	1.03751	0.438329	2.36696	0.017935	0.0971744	17.7668	5.3541	27.8506	34.6657	26.9486
1382	Chr1:187033721-187034345	21.9768	0.35937	0.414542	0.866908	0.385993	0.618194	22.2085	13.3852	20.3785	28.8881	25.0237
1383	Chr1:187152662-187153183	33.2061	-0.688889	0.341129	-2.01944	0.0434418	0.172883	39.9754	48.1869	28.5299	25.2771	24.0613
1384	Chr1:187155927-187156595	36.6913	-0.0850285	0.336587	-0.252619	0.800562	0.901404	38.4948	37.4787	36.002	38.2767	33.2046
1385	Chr1:187278463-187279004	19.8856	-0.687539	0.429145	-1.60211	0.10913	0.30332	22.2085	32.1246	17.6613	7.22202	20.2115
1386	Chr1:187278811-187279235	12.5642	-0.419378	0.484189	-0.866145	0.386411	0.618549	10.364	21.4164	11.5478	6.49982	12.9931
1387	Chr1:187940602-187941269	29.0928	0.105826	0.386514	0.273796	0.784241	0.89229	41.456	10.7082	31.9263	33.9435	27.4299
1388	Chr1:188529139-188529545	17.3176	-0.341787	0.437307	-0.781572	0.434466	0.660823	14.8057	26.7705	19.0199	11.5552	14.4368
1389	Chr1:188529405-188529877	16.0436	0.264229	0.455143	0.58054	0.561551	0.758116	10.364	18.7393	17.6613	16.6106	16.8429
1390	Chr1:188571916-188573288	86.2487	0.480735	0.272036	1.76717	0.0771995	0.246555	76.9896	58.8951	91.0239	109.052	95.2826
1391	Chr1:188658016-188658477	11.5376	0.575292	0.512684	1.12212	0.261812	0.501121	10.364	5.3541	17.6613	13.7218	10.587
1392	Chr1:189038808-189039477	28.6924	0.401553	0.383525	1.04701	0.295096	0.537096	25.1697	21.4164	40.0777	27.4437	29.3548
1393	Chr1:189039406-189040122	33.0391	-0.43917	0.347846	-1.26254	0.206754	0.438081	32.5725	48.1869	31.247	26.7215	26.4674
1394	Chr1:189130231-189130578	4.32466	1.32867	0.631308	2.10462	0.035324	0.151168	1.48057	0	8.83067	6.49982	4.81226
1395	Chr1:189475610-189476082	9.99613	0.423104	0.525306	0.805443	0.420564	0.648777	11.8446	2.67705	10.1892	10.833	14.4368
1396	Chr1:189821516-189822013	16.8557	0.124107	0.440147	0.281968	0.777968	0.889221	17.7668	13.3852	16.3028	19.4995	17.3241
1397	Chr1:190484417-190485040	11.8545	0.95477	0.519901	1.83644	0.066292	0.224976	7.40285	5.3541	14.2649	17.3328	14.918
1398	Chr1:190535855-190536446	11.1971	0.386111	0.506602	0.762158	0.445966	0.670168	11.8446	5.3541	10.8685	14.444	13.4743
1399	Chr1:190830354-190830710	13.9661	1.79389	0.543337	3.30161	0.000961307	0.0116987	4.44171	2.67705	16.9821	25.9993	19.7302
1400	Chr1:190830536-190830953	18.0509	1.71357	0.508666	3.36875	0.000755086	0.00960906	5.92228	5.3541	22.4163	35.3879	21.1739
1401	Chr1:190831315-190831824	27.3523	-1.12803	0.360141	-3.13219	0.00173507	0.0185119	38.4948	45.5098	18.3406	16.6106	17.8053
1402	Chr1:190836828-190837466	19.3617	0.200482	0.423541	0.473347	0.635966	0.806153	20.728	13.3852	21.0578	22.3883	19.249
1403	Chr1:191510959-191512066	63.376	0.150153	0.296056	0.507177	0.612031	0.791235	68.1062	48.1869	67.249	76.5534	56.7846
1404	Chr1:191541938-191542382	4.3165	0.878411	0.624329	1.40697	0.159437	0.378175	1.48057	2.67705	6.11354	5.05541	6.25593
1405	Chr1:191707483-191707907	5.36829	1.21594	0.616382	1.9727	0.0485293	0.185919	2.96114	0	6.79283	7.94422	9.14328
1406	Chr1:192514424-192514983	12.4706	1.91914	0.565982	3.39081	0.000696862	0.00903136	4.44171	0	12.9064	20.9439	24.0613
1407	Chr1:192570930-192571402	10.7676	0.598877	0.527884	1.13449	0.256591	0.495736	13.3251	0	10.1892	12.9996	17.3241
1408	Chr1:192571209-192571645	9.97461	0.80709	0.540183	1.4941	0.135149	0.343555	10.364	0	10.8685	15.1662	13.4743
1409	Chr1:192734842-192735788	46.8565	0.325476	0.323948	1.00472	0.315033	0.555187	48.8588	29.4475	57.0597	48.3875	50.5287
1410	Chr1:192735594-192736141	31.4685	0.134151	0.360276	0.372358	0.709627	0.850253	29.6114	29.4475	29.2092	36.8323	32.2421
1411	Chr1:192751660-192752463	40.044	0.857534	0.354178	2.42119	0.0154696	0.087987	31.092	18.7393	50.2669	53.4429	46.6789
1412	Chr1:192752357-192752830	20.9538	-1.65865	0.401328	-4.1329	3.58e-05	0.000844197	37.0142	37.4787	12.2271	6.49982	11.5494
1413	Chr1:192752975-192753486	24.3432	0.150908	0.392619	0.384364	0.700709	0.845067	23.6891	21.4164	21.737	27.4437	27.4299
1414	Chr1:192802462-192802935	21.9984	-0.146105	0.411113	-0.355388	0.722299	0.858171	34.0531	10.7082	19.0199	25.9993	20.2115
1415	Chr1:192802772-192803203	21.959	-0.734567	0.402188	-1.82643	0.0677859	0.228006	41.456	16.0623	18.3406	19.4995	14.4368
1416	Chr1:192803091-192803574	17.1296	0.441912	0.449559	0.982991	0.325612	0.564526	17.7668	8.03114	20.3785	21.6661	17.8053
1417	Chr1:192849019-192849543	28.0797	-0.172577	0.367436	-0.469678	0.638585	0.806902	35.5337	24.0934	24.4542	27.4437	28.8735
1418	Chr1:192849247-192849599	24.3657	-0.687152	0.376093	-1.82708	0.0676875	0.227792	32.5725	32.1246	17.6613	18.7772	20.6927
1419	Chr1:192849502-192850095	36.4347	-1.25944	0.333967	-3.77117	0.000162485	0.00289053	51.8199	64.2492	20.3785	18.7772	26.9486
1420	Chr1:192850187-192850901	36.8824	0.313393	0.351296	0.892104	0.372337	0.606676	35.5337	26.7705	40.757	47.6653	33.6858
1421	Chr1:192886042-192886872	34.0326	0.570134	0.366115	1.55725	0.11941	0.319454	31.092	18.7393	42.1155	33.9435	44.2727
1422	Chr1:192886796-192887448	44.9274	-0.674308	0.307126	-2.19555	0.0281245	0.130142	56.2617	61.5721	35.3227	36.8323	34.6482
1423	Chr1:192887160-192887876	40.7952	0.401736	0.34007	1.18133	0.237471	0.474441	32.5725	34.8016	47.5498	50.5541	38.498
1424	Chr1:193006327-193006772	18.0129	0.602371	0.447764	1.34529	0.178532	0.403659	14.8057	10.7082	18.3406	24.5549	21.6551
1425	Chr1:193006515-193006844	16.4851	0.715979	0.466577	1.53454	0.124897	0.328389	13.3251	8.03114	16.3028	24.5549	20.2115
1426	Chr1:193006607-193007299	34.5894	0.0661775	0.34677	0.19084	0.848651	0.927153	32.5725	34.8016	31.9263	37.5545	36.0919
1427	Chr1:193136381-193136887	11.8024	-0.126146	0.48495	-0.260122	0.79477	0.898057	16.2863	8.03114	10.8685	10.833	12.9931
1428	Chr1:193141565-193142120	20.3551	-0.414572	0.422598	-0.981009	0.326588	0.56559	38.4948	8.03114	16.9821	19.4995	18.7678
1429	Chr1:193149709-193150426	36.0669	-0.316259	0.335164	-0.943597	0.345376	0.582148	44.4171	37.4787	30.5677	36.1101	31.7609
1430	Chr1:193150182-193150736	22.7472	0.191204	0.401811	0.475855	0.634177	0.805081	22.2085	18.7393	25.1335	25.9993	21.6551
1431	Chr1:193219301-193220205	43.0954	1.02318	0.357434	2.86258	0.00420201	0.035608	34.0531	13.3852	60.4562	57.0539	50.5287
1432	Chr1:193221554-193222149	21.6772	0.330292	0.422624	0.781526	0.434493	0.660823	26.6503	8.03114	25.8127	19.4995	28.3923
1433	Chr1:193397925-193398844	64.7451	0.528155	0.296659	1.78035	0.0750191	0.242652	56.2617	42.8328	82.8725	74.3868	67.3716
1434	Chr1:193398836-193399511	46.5931	-1.66291	0.307655	-5.4051	6.48e-08	3.97e-06	88.8342	72.2803	28.5299	21.6661	21.6551
1435	Chr1:193399947-193400497	26.0794	0.970355	0.414105	2.34326	0.019116	0.101344	20.728	8.03114	33.2849	37.5545	30.7984
1436	Chr1:193541413-193541876	18.1138	-0.743238	0.414126	-1.79471	0.0726992	0.237777	25.1697	24.0934	12.9064	14.444	13.9555
1437	Chr1:193541741-193542215	19.9377	-1.838	0.408213	-4.50255	6.71e-06	0.000206232	31.092	42.8328	7.47211	10.1108	8.18083
1438	Chr1:193542286-193542838	26.5577	-1.47866	0.363883	-4.06355	4.83e-05	0.00107569	41.456	48.1869	14.2649	14.444	14.4368
1439	Chr1:193543116-193543479	10.002	1.09193	0.550014	1.98528	0.0471137	0.18229	4.44171	5.3541	14.9442	10.833	14.4368
1440	Chr1:193645150-193645810	42.8389	-1.97188	0.31579	-6.24426	4.26e-10	4.83e-08	88.8342	69.6033	20.3785	16.6106	18.7678
1441	Chr1:193645781-193646200	16.8886	-0.018451	0.438932	-0.0420361	0.96647	0.983589	22.2085	10.7082	14.9442	17.3328	19.249
1442	Chr1:193730744-193731183	21.5031	-1.04465	0.393468	-2.65497	0.00793146	0.0556222	32.5725	32.1246	15.6235	10.833	16.3617
1443	Chr1:193771281-193771848	14.8537	0.462636	0.473476	0.977106	0.328517	0.567107	10.364	13.3852	15.6235	13.7218	21.1739
1444	Chr1:193813331-193814158	28.7354	0.595468	0.38523	1.54575	0.122166	0.324202	25.1697	16.0623	31.9263	38.2767	32.2421
1445	Chr1:193915918-193916230	8.21272	0.652239	0.570238	1.1438	0.252706	0.491655	1.48057	10.7082	11.5478	5.77761	11.5494
1446	Chr1:193916061-193916581	15.8359	-0.194668	0.460539	-0.422697	0.672516	0.827586	11.8446	24.0934	20.3785	9.38862	13.4743
1447	Chr1:193916568-193917076	12.8068	0.734306	0.514918	1.42607	0.153849	0.369858	4.44171	13.3852	11.5478	21.6661	12.9931
1448	Chr1:193960147-193960619	21.696	-0.122665	0.40671	-0.301603	0.762955	0.879873	17.7668	29.4475	16.9821	21.6661	22.6176
1449	Chr1:193962004-193962572	29.2342	-1.06779	0.352468	-3.02945	0.00244998	0.024028	39.9754	48.1869	19.0199	18.7772	20.2115
1450	Chr1:194014585-194015020	10.443	-0.364843	0.510547	-0.714611	0.474849	0.693236	7.40285	18.7393	10.1892	5.77761	10.1057
1451	Chr1:194014924-194015339	8.92713	0.274281	0.534779	0.512887	0.60803	0.788853	7.40285	8.03114	10.1892	7.94422	11.0682
1452	Chr1:194571391-194571956	25.1941	-3.42642	0.420682	-8.14491	3.8e-16	1.94e-13	50.3394	64.2492	2.71713	5.77761	2.88735
1453	Chr1:194596830-194597361	20.5709	-0.174122	0.409474	-0.425233	0.670667	0.826341	25.1697	18.7393	15.6235	23.1105	20.2115
1454	Chr1:194660931-194661353	11.3068	-0.0251387	0.494547	-0.0508317	0.95946	0.981289	16.2863	5.3541	11.5478	12.2774	11.0682
1455	Chr1:194661269-194661822	12.0799	0.821953	0.512696	1.6032	0.108891	0.303184	8.88342	5.3541	12.2271	16.6106	17.3241
1456	Chr1:194680856-194681165	8.69503	0.228412	0.536684	0.425599	0.6704	0.826213	7.40285	8.03114	9.50996	7.94422	10.587
1457	Chr1:194681001-194681357	14.5811	-0.500848	0.454469	-1.10205	0.270439	0.510751	13.3251	24.0934	13.5857	10.833	11.0682
1458	Chr1:194681103-194681585	18.9973	-0.879047	0.412174	-2.13271	0.0329488	0.144331	25.1697	29.4475	16.3028	10.1108	13.9555
1459	Chr1:194860912-194861695	27.8216	0.660572	0.389655	1.69527	0.0900235	0.269627	20.728	18.7393	30.5677	33.9435	35.1295
1460	Chr1:194861486-194862025	22.9067	-0.0960349	0.393244	-0.244212	0.807066	0.904802	28.1308	18.7393	22.4163	23.1105	22.1364
1461	Chr1:194955464-194956515	58.559	-0.0255594	0.295952	-0.0863633	0.931178	0.968453	59.2228	58.8951	65.8904	59.2206	49.5662
1462	Chr1:194956484-194957113	21.1106	0.511226	0.436373	1.17153	0.241384	0.478861	26.6503	2.67705	27.8506	23.8327	24.5425
1463	Chr1:194979180-194979669	17.79	0.0197749	0.438042	0.045144	0.963993	0.982909	14.8057	21.4164	14.9442	15.1662	22.6176
1464	Chr1:194979553-194980105	16.5287	0.532248	0.458759	1.16019	0.245972	0.484026	11.8446	13.3852	16.9821	17.3328	23.0988
1465	Chr1:194998763-194999736	46.3131	0.464322	0.33299	1.3944	0.163196	0.383857	47.3782	24.0934	60.4562	47.6653	51.9724
1466	Chr1:194999657-195000242	27.2365	-0.143023	0.396969	-0.360289	0.718631	0.856002	44.4171	10.7082	23.7749	33.2213	24.0613
1467	Chr1:195208684-195209275	8.04051	0.622422	0.5576	1.11625	0.264315	0.504063	7.40285	2.67705	10.8685	10.1108	9.14328
1468	Chr1:196445952-196447213	50.3188	-0.162496	0.309084	-0.525733	0.599074	0.782704	59.2228	48.1869	45.5119	41.8877	56.7846
1469	Chr1:196764905-196765620	27.8951	-0.222384	0.369044	-0.602595	0.546778	0.747509	29.6114	32.1246	30.5677	23.1105	24.0613
1470	Chr1:196802457-196803458	40.823	-0.28275	0.322145	-0.877713	0.3801	0.613239	48.8588	42.8328	33.9641	38.9989	39.4605
1471	Chr1:196917983-196918655	21.3209	0.201289	0.410818	0.48997	0.624155	0.79857	17.7668	21.4164	22.4163	20.9439	24.0613
1472	Chr1:196956451-196956918	15.3603	1.49588	0.51453	2.90727	0.00364601	0.0321847	5.92228	5.3541	25.8127	22.3883	17.3241
1473	Chr1:196956675-196957343	33.8541	0.708786	0.370922	1.91088	0.0560205	0.202626	25.1697	21.4164	46.8705	41.1655	34.6482
1474	Chr1:196957417-196957893	20.697	0.565564	0.429284	1.31746	0.187684	0.414689	14.8057	16.0623	27.8506	24.5549	20.2115
1475	Chr1:197002472-197003038	10.4121	0.707601	0.529997	1.3351	0.181843	0.407905	5.92228	8.03114	10.1892	12.9996	14.918
1476	Chr1:197067702-197068314	11.8485	0.0152678	0.490893	0.031102	0.975188	0.988305	14.8057	8.03114	14.2649	8.66642	13.4743
1477	Chr10:3134912-3135620	28.5522	0.0553895	0.375876	0.147361	0.882847	0.945576	22.2085	34.8016	33.2849	24.5549	27.9111
1478	Chr10:3557604-3558048	10.1841	0.598758	0.531613	1.1263	0.260037	0.49934	4.44171	10.7082	12.9064	12.2774	10.587
1479	Chr10:4423715-4424214	16.1392	0.00690991	0.447969	0.015425	0.987693	0.993784	11.8446	21.4164	14.9442	16.6106	15.8804
1480	Chr10:4521433-4521905	18.9063	0.571234	0.44348	1.28807	0.197721	0.426797	10.364	18.7393	19.6992	24.5549	21.1739
1481	Chr10:4522582-4523214	36.3732	-0.636645	0.336282	-1.89319	0.0583328	0.20789	41.456	53.541	34.6434	25.2771	26.9486
1482	Chr10:4540494-4541024	28.2051	-1.37554	0.361827	-3.80166	0.000143729	0.00261031	51.8199	40.1557	12.2271	18.055	18.7678
1483	Chr10:4541829-4542287	26.4982	0.544392	0.39537	1.37692	0.168537	0.390628	25.1697	13.3852	33.2849	33.2213	27.4299
1484	Chr10:4542232-4542819	34.0441	1.15348	0.386811	2.98204	0.00286338	0.0268542	23.6891	10.7082	40.757	48.3875	46.6789
1485	Chr10:4795595-4796458	32.5846	-0.140175	0.355172	-0.394667	0.693089	0.840091	41.456	26.7705	32.6056	25.9993	36.0919
1486	Chr10:5151389-5151861	16.8874	0.369624	0.453557	0.814945	0.415104	0.644215	10.364	18.7393	15.6235	18.055	21.6551
1487	Chr10:5151607-5152299	24.9002	0.871631	0.415742	2.09657	0.036032	0.153098	13.3251	18.7393	26.492	33.2213	32.7233
1488	Chr10:5183966-5184438	8.55617	0.846066	0.565176	1.49699	0.134395	0.34242	4.44171	5.3541	7.47211	15.8884	9.62451
1489	Chr10:5633850-5634485	28.0489	-0.329485	0.372405	-0.88475	0.376291	0.609977	23.6891	42.8328	21.737	25.9993	25.9862
1490	Chr10:5913242-5913763	29.5167	-0.125395	0.364031	-0.344463	0.730498	0.862948	28.1308	34.8016	27.8506	31.7769	25.0237
1491	Chr10:5913854-5915089	73.2274	-0.873971	0.262781	-3.32585	0.000881493	0.0109405	102.159	101.728	52.984	54.8873	54.3785
1492	Chr10:5957825-5958282	23.6242	-0.135151	0.396215	-0.341105	0.733025	0.863912	32.5725	16.0623	27.8506	19.4995	22.1364
1493	Chr10:6011404-6012033	39.1658	0.182647	0.343722	0.531382	0.595154	0.780289	32.5725	40.1557	32.6056	49.1097	41.3854
1494	Chr10:6078803-6079676	59.5484	0.250203	0.294726	0.848935	0.395918	0.62702	59.2228	45.5098	65.2111	65.7204	62.0781
1495	Chr10:6103304-6103880	32.4114	-0.208228	0.352173	-0.591267	0.554342	0.753232	42.9365	26.7705	27.8506	30.3325	34.167
1496	Chr10:6103736-6104255	22.4405	-0.0276528	0.397741	-0.0695246	0.944572	0.974894	23.6891	21.4164	23.7749	23.1105	20.2115
1497	Chr10:6202923-6203380	9.37412	0.469224	0.539656	0.869487	0.384581	0.617281	4.44171	10.7082	12.2271	7.94422	11.5494
1498	Chr10:6234920-6235394	12.061	-0.183706	0.495019	-0.37111	0.710556	0.850853	8.88342	18.7393	12.2271	6.49982	13.9555
1499	Chr10:6372195-6372769	33.1622	0.0031982	0.351532	0.00909788	0.992741	0.995968	29.6114	37.4787	29.8884	34.6657	34.167
1500	Chr10:6372639-6373491	58.2673	-0.977399	0.289702	-3.3738	0.000741369	0.00948634	87.3536	80.3114	50.2669	35.3879	38.0168
1501	Chr10:6473417-6473877	7.65116	0.775692	0.571029	1.35841	0.174333	0.398456	5.92228	2.67705	6.79283	10.833	12.0306
1502	Chr10:6606037-6606534	15.6225	0.200401	0.464219	0.431695	0.665963	0.823318	10.364	18.7393	12.9064	21.6661	14.4368
1503	Chr10:6979259-6979675	12.005	-0.393257	0.491231	-0.800554	0.42339	0.651159	8.88342	21.4164	9.50996	7.22202	12.9931
1504	Chr10:7309625-7310281	37.8703	-0.875519	0.324941	-2.69439	0.00705174	0.0514439	50.3394	56.218	30.5677	26.7215	25.505
1505	Chr10:7310042-7310735	39.8927	-0.0131624	0.33895	-0.0388329	0.969024	0.984555	31.092	50.8639	37.3605	45.4987	34.6482
1506	Chr10:7382247-7382719	26.9218	-0.0677514	0.379132	-0.178701	0.858172	0.932696	22.2085	34.8016	25.1335	23.1105	29.3548
1507	Chr10:7387123-7388239	82.8619	0.185564	0.272014	0.682186	0.495121	0.708303	76.9896	74.9573	87.6275	99.6639	75.0712
1508	Chr10:7400369-7400819	17.4738	0.433533	0.447702	0.968351	0.332869	0.57077	16.2863	10.7082	19.6992	23.8327	16.8429
1509	Chr10:7401204-7401642	24.5111	-1.65613	0.390374	-4.24241	2.21e-05	0.00056477	34.0531	53.541	14.2649	7.22202	13.4743
1510	Chr10:7445664-7446763	56.1577	-0.128633	0.298464	-0.430983	0.666481	0.8236	53.3005	66.9262	52.984	46.9431	60.6344
1511	Chr10:7500309-7500797	20.5482	-1.38995	0.397648	-3.49543	0.000473296	0.00664654	31.092	37.4787	11.5478	10.1108	12.5119
1512	Chr10:7500738-7501380	17.3955	0.550447	0.45847	1.20062	0.229899	0.465869	20.728	2.67705	22.4163	22.3883	18.7678
1513	Chr10:7511937-7512697	50.8013	-0.148125	0.313368	-0.472687	0.636436	0.80647	68.1062	37.4787	50.9462	54.1651	43.3103
1514	Chr10:7512849-7513661	48.8421	0.302604	0.31402	0.963646	0.335223	0.573144	39.9754	45.5098	51.6255	54.1651	52.9348
1515	Chr10:7551932-7552448	9.5227	0.815414	0.543126	1.50133	0.133269	0.340544	5.92228	5.3541	11.5478	12.2774	12.5119
1516	Chr10:7561490-7561971	7.64508	0.626247	0.571554	1.09569	0.273213	0.513455	2.96114	8.03114	10.8685	5.77761	10.587
1517	Chr10:7674624-7675261	29.222	-0.0272563	0.370361	-0.0735937	0.941334	0.973263	25.1697	34.8016	27.1713	33.9435	25.0237
1518	Chr10:7676136-7676707	30.8618	-1.24968	0.362706	-3.44544	0.000570126	0.00773565	32.5725	66.9262	16.3028	18.7772	19.7302
1519	Chr10:7977478-7978041	4.7563	1.34939	0.628875	2.14573	0.0318948	0.14175	0	2.67705	8.83067	5.05541	7.21838
1520	Chr10:8238089-8238716	40.2554	-1.28639	0.326718	-3.9373	8.24e-05	0.00165045	63.6645	64.2492	31.247	18.055	24.0613
1521	Chr10:8238821-8239293	15.9594	0.547326	0.461424	1.18617	0.235556	0.472347	14.8057	8.03114	20.3785	17.3328	19.249
1522	Chr10:8248737-8249196	4.4057	0.989881	0.623975	1.58641	0.112646	0.309123	2.96114	0	6.79283	6.49982	5.77471
1523	Chr10:8521028-8521536	9.2668	0.583801	0.538424	1.08428	0.278242	0.518456	7.40285	5.3541	9.50996	11.5552	12.5119
1524	Chr10:8539339-8539798	7.37077	0.258949	0.570382	0.453993	0.649834	0.813826	2.96114	10.7082	10.1892	4.33321	8.66206
1525	Chr10:8606094-8606566	24.4675	0.368924	0.401901	0.917946	0.358647	0.594235	23.6891	16.0623	22.4163	33.2213	26.9486
1526	Chr10:9394270-9395028	30.9442	-0.177212	0.363969	-0.486889	0.626337	0.79995	28.1308	40.1557	22.4163	30.3325	33.6858
1527	Chr10:9620086-9620668	24.8941	-0.0534024	0.388413	-0.137489	0.890645	0.949188	22.2085	29.4475	28.5299	23.1105	21.1739
1528	Chr10:9620968-9621405	17.2848	-0.0605907	0.431861	-0.140301	0.888422	0.948036	19.2474	16.0623	17.6613	15.1662	18.2866
1529	Chr10:10277312-10278155	23.9765	0.595856	0.410138	1.45282	0.146275	0.35916	14.8057	21.4164	24.4542	30.3325	28.8735
1530	Chr10:10869181-10869827	38.885	-0.853985	0.323215	-2.64216	0.00823797	0.0569741	59.2228	48.1869	28.5299	32.4991	25.9862
1531	Chr10:10869582-10870227	30.4192	0.0817546	0.370197	0.22084	0.825217	0.913902	39.9754	16.0623	33.9641	31.7769	30.3172
1532	Chr10:11001672-11002540	49.0556	0.488214	0.323117	1.51095	0.130801	0.336995	35.5337	42.8328	51.6255	64.276	51.0099
1533	Chr10:11062740-11064033	49.4632	-0.0507816	0.308263	-0.164735	0.869153	0.938505	59.2228	40.1557	50.9462	48.3875	48.6038
1534	Chr10:11355266-11355708	4.12266	0.480646	0.621408	0.773479	0.439239	0.66505	2.96114	2.67705	6.79283	2.88881	5.29348
1535	Chr10:12292695-12293180	12.926	1.03877	0.512608	2.02644	0.0427196	0.170832	5.92228	8.03114	16.9821	17.3328	16.3617
1536	Chr10:12299022-12299675	17.7934	0.605827	0.453126	1.33699	0.181225	0.407159	10.364	16.0623	19.6992	24.5549	18.2866
1537	Chr10:12333493-12334141	44.9166	1.07741	0.36361	2.9631	0.00304558	0.0280441	22.2085	29.4475	63.1733	67.887	41.8666
1538	Chr10:12333936-12334503	35.0334	0.946169	0.39521	2.39409	0.0166615	0.0923245	20.728	21.4164	50.9462	54.1651	27.9111
1539	Chr10:12511656-12512031	8.04246	0.42383	0.553008	0.766409	0.443433	0.668083	8.88342	2.67705	7.47211	11.5552	9.62451
1540	Chr10:12532545-12533549	30.8432	0.966973	0.388432	2.48943	0.0127949	0.0771034	22.2085	13.3852	38.7191	38.9989	40.9042
1541	Chr10:12587586-12588090	21.2171	0.29403	0.416055	0.706708	0.479748	0.69687	22.2085	13.3852	27.1713	20.2217	23.0988
1542	Chr10:12588018-12588699	33.0759	0.155673	0.362319	0.429658	0.667445	0.824076	38.4948	21.4164	37.3605	28.1659	39.9417
1543	Chr10:12588908-12589457	41.8757	-1.323	0.330147	-4.0073	6.14e-05	0.00130347	54.7811	80.3114	31.9263	23.1105	19.249
1544	Chr10:12642004-12642499	22.6549	-0.563652	0.387792	-1.45349	0.146088	0.35896	32.5725	24.0934	18.3406	20.9439	17.3241
1545	Chr10:12642378-12643158	41.1382	-0.656774	0.344441	-1.90678	0.056549	0.203658	63.6645	42.8328	41.4362	20.2217	37.5356
1546	Chr10:12660838-12661724	22.8739	1.33243	0.445744	2.98922	0.00279689	0.0264189	10.364	10.7082	31.9263	29.6103	31.7609
1547	Chr10:12683723-12684202	19.2288	0.0284679	0.423899	0.0671572	0.946457	0.975905	14.8057	24.0934	19.6992	20.2217	17.3241
1548	Chr10:12683954-12684457	25.1294	-0.401902	0.375411	-1.07056	0.284366	0.525357	32.5725	26.7705	21.0578	21.6661	23.58
1549	Chr10:12727758-12728224	19.5297	-0.0821395	0.415969	-0.197466	0.843463	0.924363	23.6891	16.0623	16.9821	21.6661	19.249
1550	Chr10:12728153-12728627	24.3059	-0.700095	0.378644	-1.84895	0.0644648	0.221278	32.5725	32.1246	22.4163	16.6106	17.8053
1551	Chr10:12728492-12728984	23.5018	0.0476754	0.398926	0.119509	0.904872	0.956275	17.7668	29.4475	26.492	21.6661	22.1364
1552	Chr10:12780485-12781202	28.4563	0.148358	0.376667	0.39387	0.693677	0.840504	22.2085	32.1246	25.1335	29.6103	33.2046
1553	Chr10:12911886-12912482	20.811	0.446837	0.423891	1.05413	0.291822	0.533401	14.8057	18.7393	23.0956	26.7215	20.6927
1554	Chr10:12912232-12912748	30.7684	-0.207837	0.36382	-0.571264	0.567821	0.761889	28.1308	40.1557	32.6056	30.3325	22.6176
1555	Chr10:12912467-12913070	37.1367	-0.811088	0.328683	-2.46769	0.0135987	0.0804149	53.3005	48.1869	31.247	28.8881	24.0613
1556	Chr10:13043350-13044142	26.6013	0.0550991	0.379854	0.145053	0.884669	0.946614	25.1697	26.7705	31.247	25.2771	24.5425
1557	Chr10:13193485-13194181	37.1882	-0.977569	0.347115	-2.81627	0.00485847	0.0393734	35.5337	74.9573	21.0578	27.4437	26.9486
1558	Chr10:13193959-13194413	23.1459	-0.930743	0.411123	-2.2639	0.02358	0.116071	20.728	48.1869	9.50996	19.4995	17.8053
1559	Chr10:13220842-13221316	17.3923	-1.00134	0.420371	-2.38205	0.0172166	0.0945619	25.1697	26.7705	9.50996	12.9996	12.5119
1560	Chr10:13272387-13272977	26.0352	0.0169102	0.37958	0.0445497	0.964466	0.983129	25.1697	26.7705	26.492	23.8327	27.9111
1561	Chr10:13272910-13273833	47.3679	0.434865	0.321583	1.35226	0.176291	0.401177	41.456	34.8016	48.9084	57.7761	53.8973
1562	Chr10:13588376-13588854	15.2499	-0.497333	0.441312	-1.12694	0.259767	0.499097	19.2474	18.7393	11.5478	13.7218	12.9931
1563	Chr10:13588729-13589264	15.1474	-0.208088	0.450237	-0.462174	0.643957	0.810069	19.2474	13.3852	14.9442	16.6106	11.5494
1564	Chr10:13684986-13685289	16.5515	-0.200864	0.442102	-0.454338	0.649586	0.813594	13.3251	24.0934	17.6613	13.7218	13.9555
1565	Chr10:13702775-13703221	11.412	-0.250783	0.494519	-0.507125	0.612067	0.791235	19.2474	5.3541	8.15139	10.833	13.4743
1566	Chr10:14424418-14425454	55.6759	0.0917043	0.30193	0.303727	0.761336	0.879181	48.8588	58.8951	65.2111	51.9985	53.416
1567	Chr10:14479568-14480390	35.8469	0.0413724	0.342093	0.120939	0.903739	0.955703	35.5337	34.8016	32.6056	38.2767	38.0168
1568	Chr10:15619703-15620098	5.61961	0.233786	0.590375	0.395996	0.692108	0.839556	4.44171	5.3541	7.47211	5.05541	5.77471
1569	Chr10:17051201-17051780	10.973	0.663075	0.519139	1.27726	0.201511	0.431325	8.88342	5.3541	12.2271	15.8884	12.5119
1570	Chr10:17441589-17442254	27.7251	1.39154	0.424417	3.27871	0.00104281	0.0124656	11.8446	13.3852	41.4362	32.4991	39.4605
1571	Chr10:17442925-17443482	43.8996	-1.25578	0.309641	-4.0556	5e-05	0.00110527	68.1062	69.6033	31.247	25.9993	24.5425
1572	Chr10:17667965-17668400	11.9464	0.149487	0.490206	0.304948	0.760406	0.879072	13.3251	8.03114	13.5857	13.7218	11.0682
1573	Chr10:17741695-17742608	32.4957	0.608207	0.38016	1.59987	0.109627	0.304392	28.1308	18.7393	29.2092	38.2767	48.1226
1574	Chr10:17775227-17775754	25.0914	-2.03814	0.39316	-5.18401	2.17e-07	1.1e-05	32.5725	64.2492	11.5478	7.94422	9.14328
1575	Chr10:17775725-17776157	21.6574	-0.569378	0.395114	-1.44105	0.149571	0.363856	23.6891	32.1246	19.0199	16.6106	16.8429
1576	Chr10:17775916-17776753	33.0323	0.132426	0.353987	0.374097	0.708332	0.849445	28.1308	34.8016	35.3227	31.7769	35.1295
1577	Chr10:17933440-17933900	9.98806	1.24552	0.561244	2.21921	0.0264721	0.125089	1.48057	8.03114	11.5478	14.444	14.4368
1578	Chr10:17954377-17955197	48.2375	-0.107507	0.307252	-0.349898	0.726415	0.860666	50.3394	50.8639	43.4741	48.3875	48.1226
1579	Chr10:17955042-17955504	18.4487	0.442283	0.438603	1.00839	0.313267	0.553494	17.7668	10.7082	23.0956	18.055	22.6176
1580	Chr10:18038247-18038704	17.5806	-0.65129	0.435377	-1.49592	0.134674	0.342801	13.3251	34.8016	14.2649	12.9996	12.5119
1581	Chr10:18038585-18039094	22.5005	-1.15631	0.405389	-2.85236	0.00433963	0.0365205	20.728	50.8639	11.5478	15.8884	13.4743
1582	Chr10:18049449-18049840	11.3211	-0.149211	0.490042	-0.304486	0.760758	0.87916	13.3251	10.7082	10.1892	12.2774	10.1057
1583	Chr10:18127363-18128016	21.765	0.487433	0.424334	1.1487	0.25068	0.489354	23.6891	8.03114	29.2092	26.7215	21.1739
1584	Chr10:18251369-18251863	9.41772	0.802904	0.544724	1.47396	0.140491	0.351564	5.92228	5.3541	12.2271	10.1108	13.4743
1585	Chr10:18265668-18266146	19.0166	0.0397141	0.420627	0.0944163	0.924778	0.965995	20.728	16.0623	18.3406	20.2217	19.7302
1586	Chr10:18269116-18269584	11.4215	1.49417	0.552636	2.70371	0.00685695	0.0505002	2.96114	5.3541	16.3028	13.7218	18.7678
1587	Chr10:18310910-18311530	13.8107	1.43644	0.532819	2.69592	0.00701947	0.0512886	1.48057	10.7082	14.2649	22.3883	20.2115
1588	Chr10:18463056-18463583	17.7578	-0.0814087	0.434463	-0.187378	0.851364	0.928451	16.2863	21.4164	14.2649	15.1662	21.6551
1589	Chr10:18463328-18463879	19.392	-0.0784487	0.419604	-0.186959	0.851693	0.928576	19.2474	21.4164	15.6235	18.055	22.6176
1590	Chr10:18565022-18565710	31.6593	0.612951	0.374644	1.63609	0.101821	0.290792	26.6503	18.7393	33.9641	43.3321	35.6107
1591	Chr10:18734659-18735269	28.2282	-0.939619	0.358379	-2.62186	0.00874518	0.0595653	45.8977	34.8016	22.4163	17.3328	20.6927
1592	Chr10:18928075-18928559	8.60565	0.784563	0.55964	1.40191	0.160943	0.38055	8.88342	0	8.15139	14.444	11.5494
1593	Chr10:19432201-19432767	21.0538	-0.390976	0.400956	-0.975111	0.329505	0.567954	23.6891	26.7705	16.3028	17.3328	21.1739
1594	Chr10:19569504-19569981	19.6243	0.345261	0.426474	0.80957	0.418187	0.646668	14.8057	18.7393	21.737	20.2217	22.6176
1595	Chr10:19627069-19627615	31.3026	-1.00641	0.355653	-2.82976	0.00465827	0.0382471	41.456	50.8639	27.8506	19.4995	16.8429
1596	Chr10:19654076-19654698	31.5222	-1.24301	0.34987	-3.55279	0.00038117	0.00562467	41.456	58.8951	15.6235	20.9439	20.6927
1597	Chr10:19869315-19870088	35.49	0.430803	0.368203	1.17002	0.241995	0.47946	17.7668	42.8328	40.0777	33.9435	42.8291
1598	Chr10:19890041-19890513	11.3728	1.0273	0.530911	1.93498	0.0529927	0.195974	4.44171	8.03114	13.5857	14.444	16.3617
1599	Chr10:20010264-20010736	7.8391	0.740422	0.566389	1.30727	0.191122	0.419024	4.44171	5.3541	10.8685	7.94422	10.587
1600	Chr10:20031195-20031841	40.0066	0.729903	0.350755	2.08095	0.0374389	0.157251	32.5725	21.4164	42.7948	52.7207	50.5287
1601	Chr10:20032310-20032842	32.4894	-1.53795	0.339872	-4.52508	6.04e-06	0.000189531	59.2228	50.8639	16.9821	16.6106	18.7678
1602	Chr10:20067469-20068019	35.5557	-1.04123	0.330747	-3.14812	0.00164322	0.0177911	51.8199	53.541	27.1713	21.6661	23.58
1603	Chr10:20067836-20068416	28.2171	0.192437	0.38014	0.506227	0.612697	0.791578	20.728	32.1246	24.4542	32.4991	31.2797
1604	Chr10:20267847-20268325	6.98782	0.799528	0.587591	1.36069	0.173612	0.397696	2.96114	5.3541	12.9064	5.05541	8.66206
1605	Chr10:20671853-20672318	20.3767	-0.200346	0.410568	-0.487974	0.625569	0.799606	29.6114	13.3852	20.3785	20.2217	18.2866
1606	Chr10:20672304-20673316	49.851	-0.199664	0.303681	-0.657478	0.510873	0.719701	54.7811	53.541	47.5498	50.5541	42.8291
1607	Chr10:20797026-20797327	6.39585	0.0912306	0.576348	0.158291	0.874228	0.941168	4.44171	8.03114	7.47211	7.22202	4.81226
1608	Chr10:20864796-20865319	13.0637	0.970335	0.512351	1.89389	0.0582401	0.207617	10.364	2.67705	18.3406	20.9439	12.9931
1609	Chr10:20878723-20879061	12.4537	0.666539	0.501411	1.32933	0.183741	0.410257	8.88342	8.03114	13.5857	14.444	17.3241
1610	Chr10:21015903-21016381	29.8963	-0.578513	0.352257	-1.64231	0.100527	0.288666	38.4948	37.4787	25.1335	22.3883	25.9862
1611	Chr10:21016135-21016651	30.3844	-0.0564523	0.358006	-0.157685	0.874705	0.941289	32.5725	29.4475	28.5299	31.0547	30.3172
1612	Chr10:21174697-21175165	8.75978	0.616889	0.549681	1.12227	0.261749	0.501062	4.44171	8.03114	10.8685	10.833	9.62451
1613	Chr10:21601829-21602651	25.9964	0.25886	0.390225	0.663361	0.507099	0.717224	17.7668	29.4475	27.1713	29.6103	25.9862
1614	Chr10:21643103-21643634	18.1488	1.21435	0.474627	2.55853	0.0105115	0.0676666	7.40285	10.7082	23.7749	26.7215	22.1364
1615	Chr10:21698655-21699292	31.7655	1.58688	0.42834	3.70472	0.000211627	0.00357602	19.2474	2.67705	42.7948	57.0539	37.0544
1616	Chr10:21714279-21714788	44.8057	-1.17166	0.308205	-3.80158	0.000143777	0.00261031	65.1451	72.2803	31.247	30.3325	25.0237
1617	Chr10:22364681-22365159	14.4729	0.281233	0.471721	0.596185	0.551052	0.750923	11.8446	13.3852	19.6992	11.5552	15.8804
1618	Chr10:22450077-22450661	25.465	0.462892	0.395472	1.17048	0.241807	0.479292	19.2474	21.4164	26.492	31.7769	28.3923
1619	Chr10:22451236-22451845	28.4721	-0.355252	0.361975	-0.981425	0.326383	0.565388	34.0531	32.1246	28.5299	23.1105	24.5425
1620	Chr10:22563318-22563961	15.2601	0.72015	0.479269	1.5026	0.132942	0.339912	11.8446	8.03114	13.5857	20.2217	22.6176
1621	Chr10:23507425-23508024	53.205	0.603566	0.320894	1.88089	0.0599869	0.211927	37.0142	42.8328	59.0976	73.6646	53.416
1622	Chr10:23507789-23508135	24.5639	1.18654	0.432515	2.74335	0.00608165	0.0464086	11.8446	13.3852	32.6056	37.5545	27.4299
1623	Chr10:23516412-23517445	32.8595	0.568653	0.378671	1.50171	0.133173	0.340383	14.8057	37.4787	36.6813	39.7211	35.6107
1624	Chr10:23869010-23869567	26.0694	-0.791247	0.37047	-2.13579	0.0326964	0.143725	37.0142	34.8016	18.3406	16.6106	23.58
1625	Chr10:23869284-23869806	24.1578	0.0647631	0.391239	0.165534	0.868524	0.938142	25.1697	21.4164	21.737	24.5549	27.9111
1626	Chr10:23869551-23869966	15.1603	0.340925	0.461953	0.738009	0.460509	0.681309	16.2863	8.03114	15.6235	18.055	17.8053
1627	Chr10:23899579-23900146	9.82633	0.482199	0.52849	0.912409	0.361553	0.59635	8.88342	5.3541	11.5478	13.7218	9.62451
1628	Chr10:23943206-23943768	18.0484	-0.110833	0.427103	-0.2595	0.79525	0.898351	23.6891	13.3852	15.6235	17.3328	20.2115
1629	Chr10:24031964-24032445	7.98837	0.1471	0.54994	0.267483	0.789097	0.894834	8.88342	5.3541	12.2271	5.77761	7.69961
1630	Chr10:24037089-24037529	6.72144	1.46985	0.606246	2.42452	0.0153288	0.0875341	2.96114	0	10.1892	9.38862	11.0682
1631	Chr10:24115896-24116396	5.92165	1.6647	0.622124	2.67583	0.00745449	0.0533693	1.48057	0	8.15139	10.833	9.14328
1632	Chr10:24254646-24255120	5.16722	1.17256	0.617738	1.89815	0.0576769	0.206356	2.96114	0	7.47211	7.22202	8.18083
1633	Chr10:24431065-24431953	38.0289	0.247101	0.34457	0.717128	0.473295	0.691874	26.6503	42.8328	40.757	41.8877	38.0168
1634	Chr10:24473972-24474634	16.0132	1.52921	0.509335	3.00236	0.00267894	0.0255688	4.44171	8.03114	19.6992	23.8327	24.0613
1635	Chr10:24554588-24555181	26.345	0.536722	0.394777	1.35956	0.17397	0.398071	25.1697	13.3852	33.9641	30.3325	28.8735
1636	Chr10:24555370-24555923	25.181	1.11092	0.423308	2.62438	0.0086806	0.0592288	11.8446	16.0623	29.8884	32.4991	35.6107
1637	Chr10:24589678-24590216	27.241	-0.518278	0.369396	-1.40304	0.160604	0.379959	31.092	37.4787	19.0199	21.6661	26.9486
1638	Chr10:24590096-24590733	24.1844	0.582622	0.413208	1.41	0.158541	0.377053	13.3251	24.0934	23.0956	28.1659	32.2421
1639	Chr10:24918410-24918904	10.093	0.962874	0.541768	1.77728	0.0755224	0.243587	7.40285	2.67705	12.2271	12.2774	15.8804
1640	Chr10:24919630-24920099	10.3726	0.584595	0.523884	1.11589	0.264471	0.504201	8.88342	5.3541	10.1892	12.9996	14.4368
1641	Chr10:24988452-24988882	4.96337	0.933407	0.620718	1.50375	0.132645	0.339559	0	5.3541	8.15139	5.05541	6.25593
1642	Chr10:25016546-25017287	31.8206	-0.863451	0.34322	-2.51573	0.0118785	0.0733586	41.456	48.1869	24.4542	22.3883	22.6176
1643	Chr10:25079159-25079565	10.9834	0.00663647	0.501002	0.0132464	0.989431	0.994578	13.3251	8.03114	13.5857	7.94422	12.0306
1644	Chr10:25102971-25103428	15.6998	0.631752	0.473243	1.33494	0.181895	0.407986	13.3251	8.03114	25.1335	15.1662	16.8429
1645	Chr10:25152004-25152488	16.9205	0.273293	0.445015	0.614121	0.539135	0.74205	17.7668	10.7082	18.3406	20.9439	16.8429
1646	Chr10:25152258-25152665	12.9317	0.130593	0.480026	0.272054	0.785581	0.89306	13.3251	10.7082	12.2271	11.5552	16.8429
1647	Chr10:25427646-25428107	8.16941	0.589806	0.555941	1.06092	0.288728	0.529798	5.92228	5.3541	8.15139	9.38862	12.0306
1648	Chr10:25798159-25798944	27.7345	0.00180293	0.384204	0.00469264	0.996256	0.99797	22.2085	34.8016	21.737	25.2771	34.6482
1649	Chr10:26095427-26095904	21.0719	0.905502	0.440917	2.05368	0.0400066	0.164054	10.364	16.0623	23.0956	30.3325	25.505
1650	Chr10:26415033-26415491	15.1614	0.17289	0.477626	0.361977	0.717369	0.855135	5.92228	24.0934	14.2649	12.2774	19.249
1651	Chr10:26492176-26492772	20.1769	0.215247	0.417915	0.515051	0.606518	0.787809	17.7668	18.7393	21.0578	20.2217	23.0988
1652	Chr10:27336138-27336785	13.4862	0.550013	0.491017	1.12015	0.262649	0.502148	7.40285	13.3852	12.2271	16.6106	17.8053
1653	Chr10:27793797-27794391	40.1172	0.32898	0.335719	0.979928	0.327122	0.566093	34.0531	34.8016	40.757	44.7765	46.1976
1654	Chr10:27794556-27795077	40.0954	-0.923156	0.318757	-2.89611	0.00377821	0.0328955	57.7422	56.218	32.6056	27.4437	26.4674
1655	Chr10:27795138-27795668	35.2186	0.155021	0.346418	0.447498	0.654516	0.816098	31.092	34.8016	38.7191	36.8323	34.6482
1656	Chr10:28863368-28864082	29.6297	1.15884	0.407165	2.84612	0.00442553	0.0370392	19.2474	10.7082	45.5119	31.7769	40.9042
1657	Chr10:29032556-29033094	27.9796	0.156603	0.375784	0.416736	0.676872	0.829809	29.6114	21.4164	25.8127	33.2213	29.836
1658	Chr10:29033297-29033915	21.4877	0.932238	0.436469	2.13586	0.0326906	0.143725	16.2863	8.03114	29.2092	28.8881	25.0237
1659	Chr10:29080615-29081101	20.3465	1.19887	0.461115	2.59994	0.00932405	0.0622016	13.3251	5.3541	26.492	33.9435	22.6176
1660	Chr10:29080850-29081219	17.8283	1.36683	0.483628	2.82619	0.00471047	0.0385398	7.40285	8.03114	25.8127	25.2771	22.6176
1661	Chr10:29081018-29081509	29.3281	0.222526	0.369434	0.602344	0.546946	0.747578	28.1308	24.0934	33.2849	31.7769	29.3548
1662	Chr10:29081235-29082022	55.383	-1.24381	0.286338	-4.34384	1.4e-05	0.000382385	91.7953	80.3114	32.6056	37.5545	34.6482
1663	Chr10:29081880-29082645	45.2398	-0.165497	0.322033	-0.513914	0.607312	0.78844	53.3005	42.8328	36.6813	53.4429	39.9417
1664	Chr10:29919647-29920608	48.182	-0.956257	0.300419	-3.18308	0.00145718	0.0162026	66.6256	72.2803	31.247	33.2213	37.5356
1665	Chr10:30319410-30320110	35.3705	1.07348	0.388375	2.76403	0.00570915	0.0442502	26.6503	10.7082	36.002	56.3317	47.1601
1666	Chr10:30319869-30320358	28.2848	0.239074	0.378451	0.631717	0.527572	0.733445	32.5725	16.0623	28.5299	31.0547	33.2046
1667	Chr10:30320126-30320594	30.4656	-0.282363	0.355506	-0.794256	0.427046	0.65442	34.0531	34.8016	31.247	26.7215	25.505
1668	Chr10:30320478-30321085	25.7019	0.254904	0.386733	0.659121	0.509818	0.719085	23.6891	21.4164	28.5299	28.8881	25.9862
1669	Chr10:30337405-30338087	42.9751	0.507357	0.334961	1.51467	0.129855	0.335637	32.5725	34.8016	50.2669	53.4429	43.7915
1670	Chr10:30337871-30338452	40.4775	-0.587031	0.322347	-1.82111	0.0685897	0.229352	56.2617	45.5098	38.0398	33.2213	29.3548
1671	Chr10:30338262-30338943	39.1808	0.449256	0.354554	1.2671	0.205119	0.436207	41.456	18.7393	50.2669	48.3875	37.0544
1672	Chr10:30521922-30522762	43.7131	0.246176	0.337351	0.729731	0.465555	0.685507	48.8588	26.7705	57.739	40.4433	44.754
1673	Chr10:30522680-30523212	29.6841	-0.842832	0.374095	-2.25299	0.02426	0.11833	35.5337	48.1869	31.247	15.1662	18.2866
1674	Chr10:30523091-30523428	18.4932	0.152989	0.435248	0.351499	0.725214	0.859845	22.2085	10.7082	25.1335	16.6106	17.8053
1675	Chr10:30523201-30523695	26.8623	0.0456606	0.375374	0.121641	0.903184	0.955367	28.1308	24.0934	26.492	26.7215	28.8735
1676	Chr10:30530090-30530615	14.1878	1.85564	0.542963	3.41762	0.000631703	0.00836008	5.92228	0	22.4163	23.8327	18.7678
1677	Chr10:30530391-30530928	23.7965	-0.126037	0.392024	-0.321504	0.747829	0.87199	28.1308	21.4164	21.0578	28.1659	20.2115
1678	Chr10:30530738-30531264	18.0343	-2.4042	0.430271	-5.58765	2.3e-08	1.66e-06	41.456	32.1246	4.0757	7.22202	5.29348
1679	Chr10:30561953-30562395	14.4818	1.03013	0.499306	2.06312	0.0391015	0.161637	13.3251	0	21.0578	18.7772	19.249
1680	Chr10:30562824-30563418	22.7461	0.330238	0.421405	0.783658	0.433241	0.659905	28.1308	8.03114	33.2849	21.6661	22.6176
1681	Chr10:31033120-31034180	50.9389	0.189595	0.328884	0.57648	0.564291	0.759853	60.7034	29.4475	62.494	59.2206	42.8291
1682	Chr10:31165106-31165856	30.08	-0.0250724	0.361448	-0.0693666	0.944698	0.974894	31.092	29.4475	29.2092	33.2213	27.4299
1683	Chr10:31329428-31329937	15.5131	0.0458393	0.471163	0.0972896	0.922496	0.964712	5.92228	26.7705	13.5857	14.444	16.8429
1684	Chr10:32609091-32609945	41.8299	-0.324781	0.324062	-1.00222	0.316238	0.555896	59.2228	34.8016	40.757	36.8323	37.5356
1685	Chr10:33094580-33095152	7.42313	1.83302	0.614472	2.98308	0.00285367	0.0267971	0	2.67705	14.9442	9.38862	10.1057
1686	Chr10:33343928-33344789	39.0224	0.12915	0.340554	0.379235	0.704514	0.847142	42.9365	29.4475	34.6434	40.4433	47.6413
1687	Chr10:33624702-33625286	17.9929	0.461889	0.441483	1.04622	0.295459	0.537385	14.8057	13.3852	20.3785	18.7772	22.6176
1688	Chr10:33625097-33625654	14.1093	0.867353	0.497182	1.74454	0.0810653	0.253755	8.88342	8.03114	19.6992	12.2774	21.6551
1689	Chr10:33670146-33671153	49.7048	0.0519865	0.306701	0.169502	0.865402	0.936492	48.8588	48.1869	48.2291	52.7207	50.5287
1690	Chr10:33738414-33739066	39.0511	0.40839	0.346302	1.17929	0.238283	0.475213	38.4948	24.0934	37.3605	47.6653	47.6413
1691	Chr10:33739573-33740520	61.5035	1.12173	0.321077	3.49365	0.000476471	0.00668076	34.0531	34.8016	85.5896	86.6642	66.4091
1692	Chr10:33753401-33753940	12.664	-0.525167	0.471364	-1.11414	0.265218	0.505352	16.2863	16.0623	8.83067	8.66642	13.4743
1693	Chr10:33815408-33816080	19.4282	0.733621	0.447774	1.63838	0.101343	0.289971	8.88342	18.7393	19.6992	23.8327	25.9862
1694	Chr10:33815854-33816327	15.8666	1.01174	0.484689	2.0874	0.036852	0.155397	7.40285	10.7082	17.6613	19.4995	24.0613
1695	Chr10:33846932-33847589	20.3378	0.466796	0.429216	1.08755	0.276792	0.51687	11.8446	21.4164	21.737	24.5549	22.1364
1696	Chr10:33926500-33927138	50.2365	-0.799583	0.301827	-2.64914	0.00806968	0.0562047	65.1451	72.2803	31.9263	44.7765	37.0544
1697	Chr10:33927225-33927678	24.1868	-0.645059	0.380255	-1.69639	0.0898128	0.269344	26.6503	37.4787	19.0199	18.055	19.7302
1698	Chr10:34001528-34002005	19.7234	0.0540141	0.426424	0.126668	0.899203	0.953905	28.1308	8.03114	21.0578	23.1105	18.2866
1699	Chr10:34001878-34002274	23.8992	-1.43884	0.384594	-3.7412	0.000183143	0.00319372	37.0142	42.8328	16.3028	13.7218	9.62451
1700	Chr10:34002446-34002856	20.532	-0.179445	0.407887	-0.439938	0.659982	0.819563	20.728	24.0934	21.737	18.7772	17.3241
1701	Chr10:34016497-34017299	35.9169	1.07502	0.379142	2.8354	0.00457679	0.0377718	25.1697	13.3852	53.6633	46.9431	40.4229
1702	Chr10:34017182-34017619	16.6017	0.855004	0.467342	1.8295	0.0673241	0.226867	11.8446	8.03114	21.737	20.2217	21.1739
1703	Chr10:34137440-34137846	13.6791	0.483068	0.48288	1.00039	0.317122	0.556614	10.364	10.7082	12.9064	18.055	16.3617
1704	Chr10:34137621-34138459	46.1561	-0.25158	0.316626	-0.794566	0.426866	0.654321	60.7034	40.1557	42.7948	49.1097	38.0168
1705	Chr10:34153871-34154385	7.5045	0.201667	0.557864	0.361498	0.717727	0.855403	11.8446	0	8.83067	8.66642	8.18083
1706	Chr10:34203304-34203657	3.88453	1.14131	0.632925	1.80323	0.0713516	0.235116	0	2.67705	5.43426	5.05541	6.25593
1707	Chr10:36226505-36226846	13.3677	0.00897543	0.474803	0.0189035	0.984918	0.992044	13.3251	13.3852	16.3028	9.38862	14.4368
1708	Chr10:36226656-36227018	16.1824	0.365239	0.45374	0.804952	0.420847	0.64894	13.3251	13.3852	18.3406	19.4995	16.3617
1709	Chr10:36227125-36227641	25.8965	0.19781	0.386147	0.512266	0.608465	0.789217	25.1697	21.4164	25.1335	31.7769	25.9862
1710	Chr10:36694139-36694749	40.7103	-1.42118	0.317854	-4.47119	7.78e-06	0.00023333	69.5868	64.2492	20.3785	22.3883	26.9486
1711	Chr10:36694885-36695628	34.7589	0.11952	0.361759	0.330386	0.741109	0.868282	26.6503	40.1557	40.0777	40.4433	26.4674
1712	Chr10:37984259-37984688	3.38888	1.54601	0.634563	2.43634	0.0148369	0.0854453	0	0	6.11354	6.49982	4.33103
1713	Chr10:38685470-38686076	13.5622	1.72318	0.541934	3.17968	0.00147436	0.0163713	2.96114	5.3541	18.3406	20.9439	20.2115
1714	Chr10:38853285-38853818	17.8914	0.781641	0.45701	1.71034	0.0872036	0.265022	16.2863	5.3541	23.7749	19.4995	24.5425
1715	Chr10:38853678-38854394	27.6843	0.0496584	0.376784	0.131795	0.895146	0.951709	29.6114	24.0934	30.5677	22.3883	31.7609
1716	Chr10:38891053-38891625	16.3404	0.460041	0.457948	1.00457	0.315104	0.555236	10.364	16.0623	20.3785	16.6106	18.2866
1717	Chr10:39089030-39089515	13.4414	0.111289	0.477293	0.233167	0.815632	0.908516	16.2863	8.03114	18.3406	12.9996	11.5494
1718	Chr10:39089551-39090321	35.9293	-0.888725	0.332176	-2.67546	0.00746258	0.0533693	45.8977	56.218	22.4163	28.1659	26.9486
1719	Chr10:39333042-39333655	23.3451	0.788185	0.429725	1.83416	0.0666299	0.225705	20.728	8.03114	21.0578	36.1101	30.7984
1720	Chr10:39436570-39437051	6.87865	0.175482	0.564478	0.310875	0.755896	0.876202	8.88342	2.67705	8.15139	7.94422	6.73716
1721	Chr10:39451248-39451752	31.1879	-1.9527	0.348491	-5.6033	2.1e-08	1.53e-06	62.1839	53.541	14.9442	12.2774	12.9931
1722	Chr10:39452377-39453014	44.7059	-1.06868	0.307246	-3.47827	0.000504659	0.00699559	71.0673	61.5721	31.9263	26.7215	32.2421
1723	Chr10:39452842-39453314	27.8421	0.0893659	0.374981	0.238321	0.811632	0.906779	31.092	21.4164	25.8127	28.1659	32.7233
1724	Chr10:39472559-39473020	6.60344	0.249001	0.575645	0.432559	0.665335	0.823179	5.92228	5.3541	10.1892	4.33321	7.21838
1725	Chr10:39618281-39618848	26.8402	-0.0281672	0.37697	-0.07472	0.940438	0.972944	34.0531	18.7393	25.8127	28.1659	27.4299
1726	Chr10:39679580-39680202	20.655	-0.154852	0.408958	-0.37865	0.704948	0.847466	25.1697	18.7393	20.3785	15.8884	23.0988
1727	Chr10:39744723-39745251	15.9429	0.324559	0.45606	0.711659	0.476676	0.694399	17.7668	8.03114	19.0199	15.1662	19.7302
1728	Chr10:39861128-39861847	19.1951	0.417498	0.431689	0.967125	0.333481	0.571386	19.2474	10.7082	21.737	20.2217	24.0613
1729	Chr10:39932429-39932901	7.96653	-0.213177	0.537507	-0.396603	0.69166	0.839171	11.8446	5.3541	7.47211	6.49982	8.66206
1730	Chr10:39932741-39933099	5.53593	0.658824	0.599858	1.0983	0.272074	0.512208	5.92228	0	6.11354	7.94422	7.69961
1731	Chr10:39965879-39966922	62.6265	0.275777	0.294874	0.935236	0.349667	0.585713	56.2617	53.541	73.3625	72.2202	57.7471
1732	Chr10:39976596-39977569	63.3272	-0.0372104	0.293524	-0.126771	0.899122	0.9539	75.5091	50.8639	70.6454	65.7204	53.8973
1733	Chr10:39978043-39978705	36.5224	-3.09207	0.354296	-8.72737	2.61e-18	2.05e-15	76.9896	82.9885	7.47211	6.49982	8.66206
1734	Chr10:40020117-40020714	37.9441	0.416479	0.351889	1.18355	0.236591	0.473347	38.4948	21.4164	40.757	50.5541	38.498
1735	Chr10:40068038-40068569	25.6401	0.798693	0.412014	1.93851	0.0525613	0.195027	19.2474	13.3852	26.492	39.7211	29.3548
1736	Chr10:40068554-40069027	28.2968	-0.806008	0.363212	-2.21911	0.0264793	0.125089	35.5337	42.8328	25.8127	19.4995	17.8053
1737	Chr10:40402683-40403631	30.8702	0.13922	0.376453	0.369822	0.711515	0.851405	17.7668	42.8328	28.5299	31.0547	34.167
1738	Chr10:40602151-40603030	66.8245	0.206032	0.289533	0.711603	0.47671	0.69441	62.1839	58.8951	72.004	80.8866	60.1532
1739	Chr10:40719321-40719734	5.76405	0.271025	0.588264	0.460721	0.644999	0.810727	4.44171	5.3541	7.47211	5.77761	5.77471
1740	Chr10:40791656-40792095	9.81952	0.423357	0.5296	0.79939	0.424064	0.651743	7.40285	8.03114	8.15139	14.444	11.0682
1741	Chr10:41022259-41023133	53.5992	-0.0760577	0.296917	-0.256158	0.797829	0.899955	54.7811	56.218	52.3048	51.2763	53.416
1742	Chr10:41023650-41024191	27.0866	0.18768	0.380205	0.493627	0.621569	0.796735	29.6114	18.7393	31.247	25.9993	29.836
1743	Chr10:41145619-41146110	8.79096	-0.289822	0.523141	-0.554004	0.579576	0.770233	11.8446	8.03114	7.47211	9.38862	7.21838
1744	Chr10:41169532-41170167	36.7141	0.228606	0.347126	0.658568	0.510173	0.719367	39.9754	24.0934	40.0777	43.3321	36.0919
1745	Chr10:41170046-41170601	36.0999	-1.10395	0.332466	-3.3205	0.000898569	0.0111094	45.8977	64.2492	21.737	23.1105	25.505
1746	Chr10:41170386-41170858	25.7845	0.205254	0.390597	0.525487	0.599245	0.782826	20.728	26.7705	21.737	30.3325	29.3548
1747	Chr10:41196048-41196539	29.7423	-0.608577	0.356338	-1.70786	0.0876619	0.265913	34.0531	42.8328	25.1335	25.9993	20.6927
1748	Chr10:41209768-41210241	21.484	-0.386143	0.397492	-0.971448	0.331325	0.569367	26.6503	24.0934	21.0578	15.8884	19.7302
1749	Chr10:41210109-41210783	33.4036	-0.415627	0.346837	-1.19833	0.230787	0.466424	37.0142	42.8328	29.8884	33.2213	24.0613
1750	Chr10:41238324-41239691	98.6077	-1.07351	0.252034	-4.2594	2.05e-05	0.000531462	131.771	160.623	62.494	77.9978	60.1532
1751	Chr10:41239658-41240336	39.8057	0.00664742	0.328708	0.0202228	0.983866	0.991529	41.456	37.4787	42.1155	38.9989	38.9793
1752	Chr10:41410061-41410582	11.871	0.485766	0.50321	0.965333	0.334378	0.572222	11.8446	5.3541	10.8685	15.8884	15.3992
1753	Chr10:41471738-41472178	8.16571	0.214683	0.551109	0.389547	0.696872	0.842751	4.44171	10.7082	8.83067	10.1108	6.73716
1754	Chr10:41528676-41529514	41.9365	0.590285	0.339613	1.73811	0.0821917	0.255964	37.0142	24.0934	52.3048	49.1097	47.1601
1755	Chr10:41529807-41530391	27.5267	-1.20269	0.362317	-3.31944	0.000901967	0.0111406	42.9365	42.8328	21.0578	15.8884	14.918
1756	Chr10:41607156-41607803	23.8858	-0.421786	0.384649	-1.09655	0.27284	0.513042	32.5725	24.0934	23.7749	17.3328	21.6551
1757	Chr10:41737842-41738305	10.4336	0.416699	0.517146	0.805767	0.420377	0.648645	10.364	5.3541	13.5857	12.2774	10.587
1758	Chr10:41738177-41738613	5.95867	1.24403	0.611837	2.03326	0.0420258	0.169166	1.48057	2.67705	9.50996	9.38862	6.73716
1759	Chr10:42194528-42194991	24.131	0.359174	0.398987	0.900215	0.368006	0.602647	19.2474	21.4164	29.2092	25.2771	25.505
1760	Chr10:42197616-42198291	38.5636	-0.197607	0.328748	-0.601089	0.547781	0.7484	41.456	42.8328	34.6434	35.3879	38.498
1761	Chr10:42221682-42222303	36.6788	-1.15919	0.335928	-3.4507	0.000559137	0.00762122	44.4171	69.6033	25.8127	19.4995	24.0613
1762	Chr10:42222602-42223211	20.5147	0.461459	0.422899	1.09118	0.275193	0.515492	16.2863	16.0623	23.7749	23.8327	22.6176
1763	Chr10:42292384-42292856	8.98767	0.867294	0.560362	1.54774	0.121685	0.323278	2.96114	8.03114	7.47211	12.9996	13.4743
1764	Chr10:42398616-42399349	27.5175	-0.628521	0.365446	-1.71987	0.0854557	0.262341	29.6114	42.8328	20.3785	21.6661	23.0988
1765	Chr10:42481329-42481813	25.9307	-1.62845	0.370341	-4.39717	1.1e-05	0.000311467	39.9754	50.8639	14.2649	12.9996	11.5494
1766	Chr10:42482107-42482731	24.4273	0.782831	0.412863	1.8961	0.0579464	0.206916	16.2863	16.0623	26.492	29.6103	33.6858
1767	Chr10:42649946-42650445	9.25362	0.895455	0.55243	1.62094	0.105031	0.296384	8.88342	0	10.1892	12.2774	14.918
1768	Chr10:42666481-42667006	12.2534	0.345657	0.49235	0.702056	0.482644	0.698923	11.8446	8.03114	11.5478	14.444	15.3992
1769	Chr10:42741517-42741989	9.60886	0.644285	0.539033	1.19526	0.231985	0.467787	7.40285	5.3541	12.9064	7.94422	14.4368
1770	Chr10:42894479-42894904	23.4234	-0.700984	0.399409	-1.75505	0.0792508	0.250375	19.2474	45.5098	16.9821	15.1662	20.2115
1771	Chr10:42894658-42895232	28.0408	-0.198731	0.371507	-0.534932	0.592697	0.778402	25.1697	37.4787	25.8127	22.3883	29.3548
1772	Chr10:42940396-42940878	28.2426	0.260577	0.381374	0.68326	0.494442	0.707763	29.6114	18.7393	31.247	36.1101	25.505
1773	Chr10:42941232-42942258	60.2128	-0.0180733	0.287295	-0.0629083	0.949839	0.977108	62.1839	58.8951	61.8147	58.4984	59.672
1774	Chr10:43187515-43188064	15.6895	0.701177	0.477994	1.46691	0.1424	0.354317	10.364	10.7082	17.6613	25.2771	14.4368
1775	Chr10:43259629-43260824	55.7003	0.244144	0.300944	0.811259	0.417217	0.645962	53.3005	45.5098	55.0219	63.5538	61.1156
1776	Chr10:43278906-43279411	5.551	0.944397	0.606654	1.55673	0.119534	0.319607	4.44171	0	8.15139	6.49982	8.66206
1777	Chr10:43298221-43298663	20.2027	-0.455339	0.404533	-1.12559	0.260338	0.49963	25.1697	24.0934	19.0199	14.444	18.2866
1778	Chr10:43298649-43299294	38.3081	-1.63317	0.326343	-5.00446	5.6e-07	2.5e-05	71.0673	61.5721	16.3028	19.4995	23.0988
1779	Chr10:43620735-43621403	28.8482	0.203706	0.372084	0.547474	0.584053	0.772737	23.6891	29.4475	28.5299	30.3325	32.2421
1780	Chr10:43621365-43622090	47.4787	-0.705425	0.307437	-2.29454	0.0217597	0.110162	75.5091	48.1869	36.6813	40.4433	36.5731
1781	Chr10:43621867-43622463	25.8888	1.3278	0.431666	3.07598	0.00209812	0.0213793	14.8057	8.03114	34.6434	41.1655	30.7984
1782	Chr10:43638583-43639048	5.55235	1.25136	0.614807	2.03536	0.0418143	0.16866	2.96114	0	7.47211	8.66642	8.66206
1783	Chr10:43725525-43726115	18.1513	0.473057	0.440975	1.07275	0.283383	0.524449	14.8057	13.3852	23.0956	18.7772	20.6927
1784	Chr10:43725859-43726267	11.9708	0.456286	0.504265	0.904855	0.365542	0.600095	10.364	8.03114	14.2649	9.38862	17.8053
1785	Chr10:43868347-43868835	11.9258	-0.464851	0.492526	-0.94381	0.345267	0.582003	11.8446	18.7393	8.83067	5.77761	14.4368
1786	Chr10:43987725-43988194	25.9913	-0.648001	0.367793	-1.76186	0.0780922	0.248354	35.5337	32.1246	19.6992	20.9439	21.6551
1787	Chr10:43988391-43989124	37.3901	0.309453	0.34498	0.897019	0.369709	0.604046	28.1308	37.4787	41.4362	41.8877	38.0168
1788	Chr10:44090572-44091065	13.9925	0.00444937	0.482021	0.00923065	0.992635	0.995968	5.92228	24.0934	11.5478	12.9996	15.3992
1789	Chr10:44160968-44161620	31.7584	0.378908	0.367091	1.03219	0.301983	0.542831	32.5725	18.7393	36.002	32.4991	38.9793
1790	Chr10:44178032-44178558	22.8917	0.75144	0.423841	1.77293	0.0762407	0.244748	20.728	8.03114	26.492	33.2213	25.9862
1791	Chr10:44202689-44203176	14.0823	0.753455	0.49108	1.53428	0.12496	0.328427	11.8446	5.3541	14.9442	22.3883	15.8804
1792	Chr10:44249275-44250010	34.9607	-0.0969795	0.348638	-0.278167	0.780884	0.890963	44.4171	26.7705	40.0777	33.2213	30.3172
1793	Chr10:44258587-44259055	4.79053	1.0914	0.621558	1.7559	0.0791051	0.250236	2.96114	0	6.79283	5.05541	9.14328
1794	Chr10:44786441-44786905	16.8147	0.0219745	0.437198	0.0502622	0.959913	0.981484	19.2474	13.3852	16.3028	17.3328	17.8053
1795	Chr10:45008941-45009362	11.3724	-0.544108	0.484942	-1.12201	0.261859	0.50114	13.3251	16.0623	10.8685	7.94422	8.66206
1796	Chr10:45009172-45009510	12.7677	-0.587589	0.468491	-1.25422	0.209763	0.441901	14.8057	18.7393	8.15139	11.5552	10.587
1797	Chr10:45054931-45055602	22.5819	-0.117458	0.396745	-0.296054	0.767189	0.882134	23.6891	24.0934	24.4542	18.055	22.6176
1798	Chr10:45055691-45056173	18.9469	-0.413665	0.414323	-0.998412	0.31808	0.557596	23.6891	21.4164	18.3406	17.3328	13.9555
1799	Chr10:45165743-45166241	10.8707	0.876284	0.529099	1.65618	0.0976849	0.283796	8.88342	2.67705	12.2271	16.6106	13.9555
1800	Chr10:45188907-45189548	33.2221	0.663133	0.371184	1.78653	0.0740131	0.240621	29.6114	16.0623	36.6813	44.7765	38.9793
1801	Chr10:45204858-45205320	16.8783	1.50806	0.499198	3.02097	0.0025197	0.0245054	8.88342	2.67705	24.4542	26.7215	21.6551
1802	Chr10:45206333-45207012	25.9088	0.407886	0.395519	1.03127	0.302415	0.543037	25.1697	16.0623	34.6434	23.8327	29.836
1803	Chr10:45297556-45298039	19.724	-0.930569	0.412845	-2.25404	0.0241936	0.118163	20.728	37.4787	15.6235	13.7218	11.0682
1804	Chr10:49502506-49503380	32.9296	0.360367	0.384591	0.937012	0.348752	0.585217	13.3251	45.5098	31.9263	36.8323	37.0544
1805	Chr10:49508004-49508748	24.4761	0.446362	0.401472	1.11181	0.266219	0.506215	22.2085	16.0623	32.6056	25.9993	25.505
1806	Chr10:50311892-50312506	25.428	0.522719	0.397836	1.31391	0.188878	0.416316	22.2085	16.0623	25.8127	31.7769	31.2797
1807	Chr10:50312344-50312915	30.4647	-1.35372	0.347974	-3.8903	0.00010012	0.00194595	45.8977	53.541	16.3028	17.3328	19.249
1808	Chr10:50312783-50313263	20.9385	-0.0861774	0.40832	-0.211054	0.832845	0.918453	22.2085	21.4164	16.3028	21.6661	23.0988
1809	Chr10:50614579-50615139	21.7376	-0.305759	0.403461	-0.757842	0.448546	0.671861	28.1308	21.4164	16.3028	17.3328	25.505
1810	Chr10:50873323-50873795	7.24688	0.000339998	0.556488	0.000610971	0.999513	0.999669	8.88342	5.3541	6.11354	5.77761	10.1057
1811	Chr10:51309973-51310432	8.67017	-0.141091	0.52683	-0.26781	0.788845	0.894628	10.364	8.03114	8.83067	7.94422	8.18083
1812	Chr10:51397210-51398105	29.1149	0.822794	0.406805	2.02257	0.043117	0.172072	8.88342	32.1246	32.6056	35.3879	36.5731
1813	Chr10:51747157-51747649	16.8786	-0.111955	0.438108	-0.255541	0.798305	0.900185	23.6891	10.7082	16.3028	14.444	19.249
1814	Chr10:51953722-51954194	26.2617	-0.162688	0.394067	-0.412844	0.679721	0.831328	20.728	37.4787	16.3028	28.8881	27.9111
1815	Chr10:51954344-51954841	18.1779	1.11577	0.473685	2.35551	0.0184974	0.0991523	10.364	8.03114	18.3406	31.0547	23.0988
1816	Chr10:52039074-52039715	15.8549	0.386727	0.459428	0.841758	0.399923	0.630674	14.8057	10.7082	17.6613	14.444	21.6551
1817	Chr10:52101096-52101528	24.3593	0.0734529	0.392281	0.187245	0.851468	0.928458	25.1697	21.4164	21.0578	29.6103	24.5425
1818	Chr10:52101367-52101875	33.8291	-0.928349	0.338539	-2.74222	0.00610245	0.0465258	41.456	56.218	23.0956	25.2771	23.0988
1819	Chr10:52102266-52102710	24.0747	-0.028119	0.389469	-0.0721983	0.942444	0.973861	26.6503	21.4164	25.1335	25.9993	21.1739
1820	Chr10:52102473-52102898	18.8267	0.57467	0.438629	1.31015	0.190145	0.418071	16.2863	10.7082	23.0956	22.3883	21.6551
1821	Chr10:52137165-52137993	59.5694	-1.7664	0.282352	-6.25601	3.95e-10	4.56e-08	106.601	104.405	31.247	25.2771	30.3172
1822	Chr10:52137788-52138478	42.5002	0.126901	0.325402	0.389982	0.69655	0.842603	39.9754	40.1557	42.1155	48.3875	41.8666
1823	Chr10:52410263-52411237	41.8897	-0.24358	0.320263	-0.760563	0.446918	0.670713	42.9365	50.8639	40.0777	36.1101	39.4605
1824	Chr10:52424383-52424929	16.0651	0.463395	0.462325	1.00232	0.316191	0.55589	11.8446	13.3852	15.6235	23.1105	16.3617
1825	Chr10:53098902-53099777	42.9524	-0.781055	0.321622	-2.42849	0.015162	0.0867944	45.8977	72.2803	33.2849	35.3879	27.9111
1826	Chr10:53300282-53300930	14.6221	0.214067	0.467564	0.457836	0.64707	0.811952	19.2474	5.3541	16.9821	13.7218	17.8053
1827	Chr10:53317534-53318063	31.6398	0.10893	0.366757	0.29701	0.766459	0.881731	28.1308	32.1246	34.6434	38.2767	25.0237
1828	Chr10:53318057-53318633	29.1644	1.26715	0.417145	3.03767	0.00238412	0.0235358	14.8057	13.3852	46.8705	40.4433	30.3172
1829	Chr10:53348790-53349310	19.5561	0.601666	0.435772	1.38069	0.167374	0.389115	14.8057	13.3852	22.4163	25.9993	21.1739
1830	Chr10:53349171-53349845	34.9285	-1.33485	0.334921	-3.98557	6.73e-05	0.00139977	48.8588	64.2492	20.3785	22.3883	18.7678
1831	Chr10:53470288-53470738	14.512	0.80977	0.484722	1.67059	0.0948032	0.278666	11.8446	5.3541	19.0199	18.055	18.2866
1832	Chr10:53470560-53470910	9.82334	0.172063	0.523601	0.328614	0.742447	0.868878	11.8446	5.3541	12.9064	6.49982	12.5119
1833	Chr10:53794264-53794715	12.6673	0.548603	0.49753	1.10265	0.270178	0.51053	10.364	8.03114	16.3028	10.833	17.8053
1834	Chr10:53795575-53796152	22.9092	-0.0503364	0.406315	-0.123885	0.901406	0.954772	34.0531	10.7082	23.0956	20.2217	26.4674
1835	Chr10:55834796-55835253	24.6935	-0.488087	0.385316	-1.26672	0.205256	0.436388	35.5337	24.0934	25.8127	21.6661	16.3617
1836	Chr10:55947871-55948573	25.6584	1.50417	0.445523	3.3762	0.000734956	0.00942782	17.7668	0	37.3605	36.1101	37.0544
1837	Chr10:55948724-55949252	16.3367	0.786619	0.474497	1.6578	0.0973588	0.283221	16.2863	2.67705	24.4542	16.6106	21.6551
1838	Chr10:56097019-56097611	32.835	1.13841	0.39647	2.87135	0.00408721	0.0348658	26.6503	5.3541	41.4362	46.9431	43.7915
1839	Chr10:56151531-56152169	16.175	0.729414	0.473985	1.5389	0.123829	0.326687	14.8057	5.3541	14.2649	23.8327	22.6176
1840	Chr10:57167821-57168316	11.1876	1.02694	0.538422	1.90731	0.0564807	0.203497	5.92228	5.3541	16.9821	18.055	9.62451
1841	Chr10:57206665-57207341	31.4935	0.783648	0.378715	2.06923	0.0385245	0.160161	20.728	21.4164	41.4362	36.8323	37.0544
1842	Chr10:57251158-57252396	60.9375	0.455246	0.299209	1.5215	0.128134	0.333206	56.2617	40.1557	71.3247	72.9424	64.003
1843	Chr10:57351669-57352218	16.1857	0.815651	0.479659	1.70048	0.0890405	0.268063	5.92228	16.0623	15.6235	20.2217	23.0988
1844	Chr10:57514226-57515023	22.1983	0.146571	0.406462	0.360601	0.718398	0.855901	22.2085	18.7393	19.0199	27.4437	23.58
1845	Chr10:57717611-57718226	27.8412	0.792464	0.407877	1.9429	0.0520285	0.193826	11.8446	26.7705	34.6434	38.9989	26.9486
1846	Chr10:57718129-57718665	38.6147	-0.59751	0.338042	-1.76756	0.0771346	0.246555	34.0531	66.9262	31.9263	28.8881	31.2797
1847	Chr10:57718377-57719067	40.2933	0.354812	0.343495	1.03295	0.301629	0.542604	31.092	37.4787	41.4362	53.4429	38.0168
1848	Chr10:57785305-57785942	27.4983	0.37715	0.383016	0.984684	0.324779	0.563601	28.1308	16.0623	31.9263	31.0547	30.3172
1849	Chr10:57786198-57786768	36.9543	-0.827909	0.326782	-2.53352	0.0112923	0.0709877	48.8588	53.541	25.8127	29.6103	26.9486
1850	Chr10:57786473-57787207	44.1566	0.168123	0.324377	0.518296	0.604252	0.78674	37.0142	45.5098	44.1534	51.2763	42.8291
1851	Chr10:57834065-57834563	12.1573	0.990917	0.518061	1.91274	0.055781	0.201999	7.40285	5.3541	16.9821	16.6106	14.4368
1852	Chr10:57908799-57909585	43.8482	-0.208493	0.332014	-0.627965	0.530027	0.735361	63.6645	29.4475	38.0398	49.1097	38.9793
1853	Chr10:57909288-57909952	53.1335	-1.42558	0.296826	-4.80275	1.57e-06	6.02e-05	90.3148	82.9885	35.3227	32.4991	24.5425
1854	Chr10:57909855-57910299	35.2136	-0.860965	0.338749	-2.5416	0.0110346	0.0699225	38.4948	61.5721	23.7749	26.7215	25.505
1855	Chr10:57959848-57960408	24.0676	0.81489	0.415223	1.96254	0.0497	0.188869	19.2474	10.7082	28.5299	29.6103	32.2421
1856	Chr10:57960560-57961080	40.7716	-0.6616	0.340306	-1.94413	0.0518796	0.193516	50.3394	56.218	44.8327	28.8881	23.58
1857	Chr10:57960860-57961635	38.9071	0.329529	0.346208	0.951824	0.341186	0.578262	34.0531	32.1246	52.3048	38.9989	37.0544
1858	Chr10:58114039-58114516	7.16645	0.850052	0.581668	1.4614	0.143905	0.356553	2.96114	5.3541	10.1892	7.22202	10.1057
1859	Chr10:58683657-58684340	35.5689	-0.496313	0.343543	-1.44469	0.148545	0.362442	56.2617	29.4475	31.247	26.7215	34.167
1860	Chr10:58684154-58684663	29.6825	-0.976127	0.353657	-2.7601	0.00577843	0.0446001	41.456	45.5098	21.737	16.6106	23.0988
1861	Chr10:58785774-58786514	53.256	-2.17612	0.301703	-7.21277	5.48e-13	1.31e-10	118.446	85.6655	21.737	17.3328	23.0988
1862	Chr10:58786350-58786925	29.7851	-0.441173	0.358303	-1.23128	0.218217	0.452621	32.5725	40.1557	24.4542	22.3883	29.3548
1863	Chr10:58987648-58988052	7.29846	0.781692	0.575628	1.35798	0.17447	0.398661	7.40285	0	8.15139	9.38862	11.5494
1864	Chr10:59078360-59079080	33.6082	0.162383	0.354144	0.458522	0.646577	0.811612	32.5725	29.4475	40.0777	30.3325	35.6107
1865	Chr10:59078966-59079531	30.9098	-1.47385	0.351851	-4.18885	2.8e-05	0.000693271	54.7811	48.1869	21.737	15.8884	13.9555
1866	Chr10:59079510-59080171	24.8735	0.772687	0.414408	1.86456	0.0622438	0.216376	20.728	10.7082	33.9641	33.9435	25.0237
1867	Chr10:59165260-59166295	57.1507	0.212864	0.299908	0.709765	0.47785	0.695279	59.2228	42.8328	56.3805	65.7204	61.5969
1868	Chr10:59341643-59342277	28.9549	0.494947	0.389393	1.27107	0.203703	0.434167	29.6114	13.3852	38.7191	36.1101	26.9486
1869	Chr10:59342178-59342764	37.7799	-0.9716	0.326795	-2.97311	0.00294796	0.0274012	53.3005	56.218	31.247	23.1105	25.0237
1870	Chr10:59342515-59342841	24.3155	-0.593524	0.378646	-1.56749	0.117	0.316116	28.1308	34.8016	20.3785	18.055	20.2115
1871	Chr10:59342565-59343029	35.0885	-0.338374	0.338817	-0.998692	0.317944	0.557517	42.9365	37.4787	31.247	35.3879	28.3923
1872	Chr10:59342792-59343389	40.1975	0.0655138	0.339335	0.193065	0.846908	0.926078	44.4171	32.1246	38.0398	51.2763	35.1295
1873	Chr10:59405830-59406408	14.107	1.16795	0.509321	2.29315	0.0218394	0.110412	5.92228	8.03114	14.9442	22.3883	19.249
1874	Chr10:59413457-59414013	22.8164	0.66096	0.419122	1.57701	0.114792	0.312435	22.2085	8.03114	29.2092	28.1659	26.4674
1875	Chr10:59414039-59414394	21.6347	-0.558793	0.398895	-1.40085	0.161258	0.381038	32.5725	21.4164	22.4163	14.444	17.3241
1876	Chr10:59414160-59414695	30.3909	-0.969172	0.351815	-2.75478	0.00587319	0.0450594	50.3394	37.4787	21.0578	18.055	25.0237
1877	Chr10:59432513-59433199	18.8123	1.06015	0.462762	2.29092	0.021968	0.1108	11.8446	8.03114	25.8127	19.4995	28.8735
1878	Chr10:59465047-59465552	30.6345	0.165162	0.368625	0.448049	0.654118	0.815973	25.1697	32.1246	29.2092	38.2767	28.3923
1879	Chr10:59465445-59465916	25.3423	-0.609917	0.372862	-1.63577	0.101888	0.290911	35.5337	29.4475	21.0578	18.055	22.6176
1880	Chr10:59465882-59466510	29.6824	0.749984	0.391223	1.91702	0.0552349	0.200837	25.1697	13.3852	44.1534	32.4991	33.2046
1881	Chr10:59466261-59466952	30.0834	1.28752	0.40865	3.15068	0.00162894	0.0176815	19.2474	8.03114	43.4741	42.6099	37.0544
1882	Chr10:59569336-59569774	16.7022	-0.964319	0.432279	-2.23078	0.0256957	0.12267	20.728	29.4475	9.50996	9.38862	14.4368
1883	Chr10:59680990-59681498	17.8217	0.323033	0.447558	0.721769	0.470437	0.689348	10.364	21.4164	18.3406	15.8884	23.0988
1884	Chr10:59681251-59681767	21.1302	0.147253	0.414522	0.355235	0.722413	0.858193	16.2863	24.0934	18.3406	22.3883	24.5425
1885	Chr10:59681517-59681972	21.0006	-0.649235	0.398191	-1.63046	0.103004	0.293085	23.6891	32.1246	17.6613	15.1662	16.3617
1886	Chr10:59681715-59682038	16.7631	-1.03601	0.430194	-2.40824	0.0160295	0.0901291	19.2474	32.1246	12.2271	10.1108	10.1057
1887	Chr10:59740296-59741350	48.7915	-0.436297	0.30433	-1.43363	0.151677	0.36669	65.1451	50.8639	43.4741	38.2767	46.1976
1888	Chr10:59762519-59762945	4.63641	0.955293	0.621905	1.53608	0.12452	0.327766	1.48057	2.67705	7.47211	5.77761	5.77471
1889	Chr10:59809522-59810041	14.1121	0.75757	0.501317	1.51116	0.130748	0.33689	5.92228	13.3852	23.0956	10.833	17.3241
1890	Chr10:60029358-60029830	5.41645	1.48785	0.625215	2.37974	0.0173247	0.0949506	0	2.67705	6.11354	10.1108	8.18083
1891	Chr10:60149371-60149782	12.3767	-0.0293928	0.485122	-0.0605884	0.951687	0.977952	16.2863	8.03114	14.9442	8.66642	13.9555
1892	Chr10:60149921-60150276	10.4975	0.370132	0.514297	0.719686	0.471718	0.690357	8.88342	8.03114	12.2271	12.2774	11.0682
1893	Chr10:60215004-60215665	27.4635	-0.255048	0.370518	-0.688354	0.49123	0.705379	25.1697	37.4787	25.8127	23.8327	25.0237
1894	Chr10:60293792-60294315	25.6156	-0.552009	0.377668	-1.46162	0.143844	0.356488	28.1308	37.4787	16.9821	20.9439	24.5425
1895	Chr10:60325487-60326209	12.8522	0.912418	0.507746	1.797	0.0723362	0.237143	8.88342	5.3541	19.6992	14.444	15.8804
1896	Chr10:60543162-60543797	17.5395	0.244957	0.441383	0.554976	0.578911	0.769781	19.2474	10.7082	15.6235	22.3883	19.7302
1897	Chr10:60608537-60609082	25.3347	0.447713	0.396968	1.12783	0.259391	0.49871	19.2474	21.4164	29.2092	31.7769	25.0237
1898	Chr10:60608892-60609303	22.9145	-0.205734	0.396944	-0.518296	0.604252	0.78674	23.6891	26.7705	17.6613	26.7215	19.7302
1899	Chr10:60610625-60611078	21.8789	-0.226992	0.397251	-0.571407	0.567724	0.761889	22.2085	26.7705	19.0199	20.2217	21.1739
1900	Chr10:60735290-60736274	39.6798	0.166356	0.335301	0.496139	0.619796	0.795935	38.4948	34.8016	42.7948	36.1101	46.1976
1901	Chr10:60762680-60763287	8.11402	0.650385	0.558798	1.1639	0.244464	0.482283	7.40285	2.67705	8.83067	8.66642	12.9931
1902	Chr10:60845054-60845584	26.9497	0.337232	0.388383	0.868298	0.385231	0.617741	28.1308	16.0623	25.8127	35.3879	29.3548
1903	Chr10:60845725-60846263	37.3939	-1.05471	0.333286	-3.16458	0.00155306	0.0170604	42.9365	69.6033	25.8127	25.9993	22.6176
1904	Chr10:60880931-60881534	46.0038	-0.600996	0.313224	-1.91874	0.0550174	0.200459	60.7034	56.218	46.1912	31.7769	35.1295
1905	Chr10:60914361-60915100	43.8382	0.0938957	0.322191	0.291429	0.770723	0.884848	41.456	42.8328	40.0777	46.2209	48.6038
1906	Chr10:60938015-60938477	12.8623	0.339134	0.486418	0.697206	0.485674	0.701106	14.8057	5.3541	13.5857	16.6106	13.9555
1907	Chr10:60938447-60939428	47.1545	-0.344858	0.307439	-1.12171	0.261986	0.501217	62.1839	45.5098	41.4362	43.3321	43.3103
1908	Chr10:61057449-61058009	11.1647	0.238801	0.503162	0.474601	0.635072	0.805737	13.3251	5.3541	10.1892	12.9996	13.9555
1909	Chr10:61065120-61065794	18.3497	0.411186	0.44034	0.933793	0.350411	0.586227	11.8446	18.7393	22.4163	19.4995	19.249
1910	Chr10:61088095-61088969	23.5136	0.806253	0.420965	1.91525	0.0554605	0.201224	20.728	8.03114	30.5677	25.9993	32.2421
1911	Chr10:61110808-61111302	27.3121	-0.0810512	0.373624	-0.216932	0.828261	0.915531	29.6114	26.7705	22.4163	30.3325	27.4299
1912	Chr10:61111287-61112445	61.4979	-0.0710954	0.286417	-0.248223	0.803962	0.902911	69.5868	56.218	57.739	59.9428	64.003
1913	Chr10:61142941-61143526	32.6977	-1.25623	0.33936	-3.70175	0.000214118	0.00360859	47.3782	56.218	19.6992	20.9439	19.249
1914	Chr10:61143263-61143856	30.9189	-0.219637	0.355432	-0.617944	0.536612	0.740093	39.9754	26.7705	30.5677	30.3325	26.9486
1915	Chr10:61143752-61144151	11.0601	0.899907	0.527357	1.70645	0.0879249	0.266207	8.88342	2.67705	16.3028	14.444	12.9931
1916	Chr10:61157628-61158212	22.4627	-0.672604	0.398054	-1.68973	0.0910796	0.27151	41.456	16.0623	20.3785	18.055	16.3617
1917	Chr10:61158151-61158799	44.6315	-1.70737	0.314379	-5.43092	5.61e-08	3.49e-06	84.3925	72.2803	25.8127	16.6106	24.0613
1918	Chr10:61177920-61178405	14.7752	-0.141927	0.46044	-0.308242	0.757898	0.877438	17.7668	13.3852	9.50996	18.7772	14.4368
1919	Chr10:61215628-61216075	8.74179	0.268898	0.546613	0.491936	0.622765	0.797349	2.96114	13.3852	8.83067	9.38862	9.14328
1920	Chr10:61245573-61246064	24.15	-0.573053	0.37874	-1.51305	0.130267	0.336175	29.6114	32.1246	18.3406	19.4995	21.1739
1921	Chr10:61246329-61246747	20.4358	-0.564614	0.402814	-1.40167	0.161013	0.38068	25.1697	26.7705	16.3028	19.4995	14.4368
1922	Chr10:61246607-61247152	24.4337	0.0886354	0.390413	0.22703	0.8204	0.911087	20.728	26.7705	25.8127	25.2771	23.58
1923	Chr10:61354122-61354528	7.06376	0.438545	0.567185	0.773195	0.439407	0.665148	7.40285	2.67705	8.15139	7.94422	9.14328
1924	Chr10:61399071-61399657	13.3412	0.0651475	0.475046	0.13714	0.89092	0.949306	14.8057	10.7082	10.8685	12.9996	17.3241
1925	Chr10:61399511-61399928	9.1198	0.202785	0.529106	0.38326	0.701527	0.845671	10.364	5.3541	10.8685	7.94422	11.0682
1926	Chr10:61440758-61441294	17.7522	0.43725	0.442662	0.987774	0.323263	0.562432	14.8057	13.3852	20.3785	18.055	22.1364
1927	Chr10:61441094-61441563	17.1437	0.369267	0.444376	0.830979	0.405985	0.635899	14.8057	13.3852	19.0199	18.7772	19.7302
1928	Chr10:61441467-61441933	15.282	0.169469	0.459732	0.368625	0.712408	0.851736	10.364	18.7393	16.9821	14.444	15.8804
1929	Chr10:61573444-61573918	18.9495	-0.236887	0.417554	-0.567319	0.570497	0.764111	20.728	21.4164	16.9821	20.2217	15.3992
1930	Chr10:61693161-61694176	44.9324	-0.4061	0.312574	-1.29921	0.193871	0.422055	57.7422	48.1869	40.757	34.6657	43.3103
1931	Chr10:61732381-61732889	9.17783	0.28468	0.532296	0.534815	0.592777	0.778408	11.8446	2.67705	10.1892	8.66642	12.5119
1932	Chr10:61802939-61803417	25.1903	-0.522373	0.377756	-1.38283	0.166717	0.388532	31.092	32.1246	20.3785	17.3328	25.0237
1933	Chr10:61861289-61861892	9.44415	1.12594	0.558089	2.0175	0.0436434	0.173335	7.40285	0	13.5857	10.833	15.3992
1934	Chr10:61867705-61868239	9.58262	0.221941	0.525412	0.422414	0.672723	0.827644	8.88342	8.03114	12.2271	7.22202	11.5494
1935	Chr10:61911542-61912304	55.5969	0.458921	0.309029	1.48504	0.137532	0.347247	50.3394	37.4787	64.5319	69.3314	56.3034
1936	Chr10:61948241-61949599	88.3059	-0.634927	0.255242	-2.48755	0.0128625	0.0774201	121.407	104.405	63.8526	77.2756	74.59
1937	Chr10:61949723-61950152	14.9647	0.301621	0.465312	0.648212	0.516848	0.725278	10.364	16.0623	14.9442	15.1662	18.2866
1938	Chr10:62040523-62041298	45.4393	-0.952007	0.320017	-2.97487	0.00293117	0.027265	54.7811	77.6344	31.247	24.5549	38.9793
1939	Chr10:62063661-62064825	86.325	0.529216	0.272384	1.9429	0.0520279	0.193826	69.5868	64.2492	105.968	104.719	87.1018
1940	Chr10:62112897-62113443	27.3073	0.700899	0.39896	1.75682	0.078949	0.250155	25.1697	10.7082	37.3605	33.9435	29.3548
1941	Chr10:62113522-62114054	29.8251	-0.810198	0.367571	-2.20419	0.0275108	0.128415	37.0142	45.5098	27.8506	23.8327	14.918
1942	Chr10:62114305-62114782	29.8335	0.0126043	0.363881	0.0346385	0.972368	0.986618	34.0531	24.0934	29.8884	33.2213	27.9111
1943	Chr10:62114571-62115067	27.7655	0.80536	0.406949	1.97902	0.0478139	0.18416	23.6891	10.7082	27.1713	44.0543	33.2046
1944	Chr10:62127530-62127963	11.52	1.28852	0.54111	2.38125	0.0172541	0.0946845	4.44171	5.3541	12.9064	18.055	16.8429
1945	Chr10:62188264-62188827	20.9437	-0.646744	0.40285	-1.60542	0.108402	0.302465	23.6891	32.1246	18.3406	12.2774	18.2866
1946	Chr10:62188533-62189024	22.351	-0.942056	0.389045	-2.42146	0.0154584	0.08798	28.1308	37.4787	16.3028	12.9996	16.8429
1947	Chr10:62253920-62254312	14.9284	0.863774	0.489125	1.76596	0.0774028	0.246866	5.92228	13.3852	15.6235	19.4995	20.2115
1948	Chr10:62254448-62255109	32.938	-1.2454	0.347052	-3.58851	0.000332567	0.0050754	53.3005	50.8639	21.0578	14.444	25.0237
1949	Chr10:62382750-62383428	39.7077	-0.431396	0.325096	-1.32698	0.184515	0.411415	51.8199	42.8328	31.9263	32.4991	39.4605
1950	Chr10:62383135-62384021	60.9052	-0.670219	0.278727	-2.40457	0.0161916	0.0906623	78.4702	80.3114	47.5498	49.1097	49.085
1951	Chr10:62409301-62409851	26.3201	-0.388118	0.371435	-1.04491	0.296063	0.53789	28.1308	34.8016	21.737	22.3883	24.5425
1952	Chr10:62409669-62410334	32.6197	-0.332766	0.345347	-0.963569	0.335262	0.573159	35.5337	40.1557	29.8884	28.1659	29.3548
1953	Chr10:62442851-62443791	52.2261	-0.733898	0.293739	-2.49847	0.0124732	0.0756993	65.1451	74.9573	38.7191	38.9989	43.3103
1954	Chr10:62453535-62454117	14.474	1.14068	0.512291	2.22661	0.025973	0.123457	4.44171	10.7082	16.3028	25.9993	14.918
1955	Chr10:62485403-62485875	25.2017	0.697109	0.404853	1.72188	0.085091	0.261615	20.728	13.3852	31.247	27.4437	33.2046
1956	Chr10:62486141-62487195	81.1152	-1.65109	0.259733	-6.35688	2.06e-10	2.55e-08	127.329	152.592	45.5119	38.2767	41.8666
1957	Chr10:62486919-62487598	52.1744	0.122506	0.304757	0.401979	0.687699	0.836941	50.3394	48.1869	59.0976	49.8319	53.416
1958	Chr10:62562583-62563676	40.4791	-0.238888	0.326712	-0.731187	0.464665	0.684925	39.9754	50.8639	40.0777	32.4991	38.9793
1959	Chr10:62623433-62623942	17.6409	-2.49894	0.471419	-5.30089	1.15e-07	6.46e-06	16.2863	58.8951	3.39641	4.33321	5.29348
1960	Chr10:62654728-62655247	14.3023	0.379474	0.474179	0.800277	0.42355	0.651266	10.364	13.3852	13.5857	18.7772	15.3992
1961	Chr10:62705934-62706391	16.7779	1.27299	0.488021	2.60848	0.00909447	0.0611157	7.40285	8.03114	25.1335	23.1105	20.2115
1962	Chr10:62706802-62707137	24.251	-0.743836	0.376174	-1.97737	0.0479996	0.184542	31.092	34.8016	19.0199	18.055	18.2866
1963	Chr10:62706884-62707311	29.3992	-0.545524	0.355316	-1.53532	0.124705	0.328111	34.0531	40.1557	25.1335	24.5549	23.0988
1964	Chr10:62707055-62707733	41.7693	0.0237925	0.335164	0.0709878	0.943407	0.974343	31.092	53.541	45.5119	42.6099	36.0919
1965	Chr10:62707628-62708101	19.4712	1.13583	0.460764	2.4651	0.0136973	0.0808863	13.3251	5.3541	27.1713	28.8881	22.6176
1966	Chr10:62707984-62708345	15.5179	1.55317	0.51446	3.01903	0.00253588	0.0246336	7.40285	2.67705	21.0578	26.7215	19.7302
1967	Chr10:62800420-62800920	29.1011	1.14531	0.415953	2.75347	0.00589672	0.0451994	14.8057	16.0623	33.2849	50.5541	30.7984
1968	Chr10:62800669-62801144	29.6147	0.361747	0.383832	0.942462	0.345956	0.582642	25.1697	24.0934	28.5299	43.3321	26.9486
1969	Chr10:62801366-62802083	36.9247	-2.3322	0.346877	-6.72343	1.77e-11	2.76e-09	62.1839	85.6655	12.2271	8.66642	15.8804
1970	Chr10:62849213-62849707	15.3775	0.611578	0.471361	1.29747	0.194468	0.42293	13.3251	8.03114	16.3028	16.6106	22.6176
1971	Chr10:62891503-62891923	8.25465	1.2862	0.585045	2.19847	0.0279158	0.129457	1.48057	5.3541	14.9442	9.38862	10.1057
1972	Chr10:62891734-62892284	17.744	-0.251369	0.433967	-0.579235	0.56243	0.758556	16.2863	24.0934	19.6992	16.6106	12.0306
1973	Chr10:63349242-63349715	8.04089	0.484301	0.558028	0.867879	0.38546	0.617783	4.44171	8.03114	6.79283	10.833	10.1057
1974	Chr10:66376106-66376612	15.6376	0.444219	0.471829	0.941484	0.346457	0.583089	17.7668	5.3541	12.2271	21.6661	21.1739
1975	Chr10:66473231-66473709	6.52553	0.626123	0.588717	1.06354	0.287538	0.528883	1.48057	8.03114	7.47211	7.94422	7.69961
1976	Chr10:66559784-66560259	29.4905	-1.06941	0.354234	-3.01893	0.00253673	0.0246336	38.4948	50.8639	17.6613	18.7772	21.6551
1977	Chr10:66589072-66589540	20.153	-0.600638	0.413034	-1.45421	0.145888	0.358883	37.0142	13.3852	14.2649	17.3328	18.7678
1978	Chr10:66648360-66648822	18.929	0.501495	0.4392	1.14184	0.253521	0.492574	13.3251	16.0623	22.4163	24.5549	18.2866
1979	Chr10:66746789-66747566	30.626	0.57319	0.376228	1.52352	0.127629	0.332365	22.2085	24.0934	38.7191	31.0547	37.0544
1980	Chr10:66747317-66747788	24.3617	-0.339248	0.381057	-0.890283	0.373314	0.607643	29.6114	26.7705	19.6992	21.6661	24.0613
1981	Chr10:66792202-66792697	7.06845	1.84437	0.616555	2.99142	0.00277685	0.026278	1.48057	0	8.83067	14.444	10.587
1982	Chr10:66921378-66921850	7.82468	0.0228143	0.547756	0.0416505	0.966777	0.983751	11.8446	2.67705	6.79283	7.22202	10.587
1983	Chr10:66999731-67000265	19.9059	1.23214	0.46263	2.66334	0.00773701	0.0547208	8.88342	10.7082	22.4163	29.6103	27.9111
1984	Chr10:67011755-67012224	31.8303	-0.127676	0.354117	-0.360547	0.718438	0.855901	37.0142	29.4475	33.9641	31.7769	26.9486
1985	Chr10:67012029-67012558	35.1524	0.000299915	0.344599	0.000870332	0.999306	0.999618	35.5337	34.8016	38.0398	30.3325	37.0544
1986	Chr10:67383178-67383865	11.9415	1.1965	0.529809	2.25835	0.0239236	0.117247	7.40285	2.67705	18.3406	14.444	16.8429
1987	Chr10:67442351-67443056	29.0965	-0.0950185	0.371874	-0.255513	0.798327	0.900185	26.6503	34.8016	22.4163	34.6657	26.9486
1988	Chr10:67442802-67443152	14.6165	0.583427	0.482379	1.20948	0.226479	0.462545	10.364	10.7082	14.9442	23.1105	13.9555
1989	Chr10:67491337-67491835	12.8632	0.571899	0.494463	1.15661	0.247434	0.485189	10.364	8.03114	12.2271	15.8884	17.8053
1990	Chr10:67491973-67492431	12.6752	0.685789	0.511226	1.34146	0.179771	0.405031	14.8057	0	12.2271	20.9439	15.3992
1991	Chr10:67506882-67507392	11.4312	0.0249237	0.500961	0.0497517	0.96032	0.981629	7.40285	16.0623	11.5478	12.9996	9.14328
1992	Chr10:67599688-67600228	34.9257	-0.501795	0.341505	-1.46936	0.141735	0.35333	50.3394	34.8016	31.247	24.5549	33.6858
1993	Chr10:67659322-67659794	6.72799	0.758452	0.58563	1.2951	0.195284	0.423949	2.96114	5.3541	6.79283	9.38862	9.14328
1994	Chr10:67807985-67808406	9.89706	0.383657	0.52656	0.728611	0.46624	0.685639	5.92228	10.7082	9.50996	10.833	12.5119
1995	Chr10:67808572-67809332	17.395	0.378725	0.458683	0.825679	0.408986	0.638833	8.88342	21.4164	21.0578	12.9996	22.6176
1996	Chr10:68186701-68187158	13.0916	0.428066	0.496078	0.862901	0.388192	0.620279	5.92228	16.0623	12.9064	18.055	12.5119
1997	Chr10:68814561-68815208	41.3238	-0.255751	0.323735	-0.789999	0.429528	0.656399	39.9754	53.541	34.6434	38.9989	39.4605
[truncated: 23,620 more rows]

## Sheet: H3K4me3-significant-changes
Chromosome	start	end
Chr1	6204631	6205177
Chr1	7079406	7080299
Chr1	9689994	9690501
Chr1	10029724	10030296
Chr1	10222587	10223103
Chr1	13362789	13363355
Chr1	13579456	13580313
Chr1	15795442	15796110
Chr1	23262802	23263403
Chr1	30930334	30930828
Chr1	31006357	31006997
Chr1	33814254	33814822
Chr1	33871421	33872194
Chr1	33964790	33965229
Chr1	34496206	34496679
Chr1	35926501	35927040
Chr1	36425553	36426130
Chr1	36569106	36569588
Chr1	38055509	38056050
Chr1	39535178	39535711
Chr1	39592498	39593154
Chr1	39633662	39634308
Chr1	46909654	46910300
Chr1	50984065	50984597
Chr1	51534875	51535417
Chr1	52289703	52290219
Chr1	54251256	54251882
Chr1	55082946	55083921
Chr1	55144316	55144852
Chr1	55188086	55188727
Chr1	58450039	58450441
Chr1	58450217	58451145
Chr1	58480169	58480722
Chr1	58480488	58480990
Chr1	58560448	58561001
Chr1	58561350	58561883
Chr1	59030309	59031051
Chr1	59293310	59294205
Chr1	59741674	59742298
Chr1	59969758	59970299
Chr1	60155055	60155718
Chr1	60237340	60237849
Chr1	60466370	60467120
Chr1	60467239	60467634
Chr1	62931362	62932058
Chr1	63161525	63162354
Chr1	63223467	63224094
Chr1	63905328	63905975
Chr1	64168232	64168995
Chr1	66747310	66747858
Chr1	66747842	66748734
Chr1	66863612	66864275
Chr1	71148982	71149663
Chr1	71296827	71297366
Chr1	74552805	74553357
Chr1	74901395	74901855
Chr1	75062341	75062819
Chr1	75207229	75207813
Chr1	75215408	75215919
Chr1	75475779	75476220
Chr1	75542652	75543573
Chr1	78654320	78654885
Chr1	82313816	82314314
Chr1	82835936	82836445
Chr1	88255509	88256083
Chr1	89223483	89224017
Chr1	89406803	89407298
Chr1	89749871	89750282
Chr1	90966860	90967367
Chr1	91350899	91351347
Chr1	91351230	91351806
Chr1	93194768	93195394
Chr1	93294960	93295452
Chr1	93309383	93309964
Chr1	94803465	94804095
Chr1	95132231	95132806
Chr1	95341895	95342352
Chr1	95700460	95700965
Chr1	99665384	99666107
Chr1	108692789	108693323
Chr1	115647305	115647930
Chr1	120355562	120356165
Chr1	120524258	120524881
Chr1	120524621	120525399
Chr1	121545067	121545702
Chr1	123463355	123464196
Chr1	129670692	129671319
Chr1	129999866	130000326
Chr1	130255675	130256372
Chr1	130313387	130314059
Chr1	132613964	132614810
Chr1	133033682	133034273
Chr1	133034374	133034986
Chr1	133050265	133050939
Chr1	133141603	133142141
Chr1	133807313	133807858
Chr1	133904045	133904427
Chr1	134920807	134921294
Chr1	134930326	134930954
Chr1	135505575	135506163
Chr1	136258110	136259319
Chr1	136311797	136312348
Chr1	136391092	136391651
Chr1	136644197	136644691
Chr1	137043675	137044319
Chr1	137662569	137663115
Chr1	138311714	138312280
Chr1	138521418	138521959
Chr1	138592820	138593768
Chr1	138678351	138678841
Chr1	139795042	139795514
Chr1	141351220	141351876
Chr1	142142676	142143382
Chr1	145548600	145549159
Chr1	145549606	145550264
Chr1	145850954	145851490
Chr1	153192562	153193364
Chr1	153347319	153348003
Chr1	153602367	153602956
Chr1	154613187	154613631
Chr1	154749860	154750382
Chr1	155178369	155178811
Chr1	155179444	155180017
Chr1	155746951	155747479
Chr1	156946508	156947074
Chr1	157005662	157006179
Chr1	157589350	157589882
Chr1	157820006	157820425
Chr1	157882007	157882484
Chr1	157882722	157883234
Chr1	158489072	158489430
Chr1	158648595	158649307
Chr1	159342254	159342825
Chr1	162141444	162142566
Chr1	162965093	162966093
Chr1	163001010	163002150
Chr1	163125725	163126404
Chr1	163808047	163808628
Chr1	164670069	164670761
Chr1	166179653	166180555
Chr1	166387779	166388247
Chr1	167572493	167573169
Chr1	167932304	167932812
Chr1	172104646	172105213
Chr1	172798177	172798834
Chr1	172815153	172815690
Chr1	173041202	173041757
Chr1	173126039	173126571
Chr1	173217323	173218134
Chr1	175350621	175351122
Chr1	177622155	177622930
Chr1	178743661	178744351
Chr1	179725195	179725764
Chr1	180335708	180336587
Chr1	181598165	181598808
Chr1	181733387	181733909
Chr1	181889983	181890744
Chr1	182125561	182126451
Chr1	182571377	182572147
Chr1	182656087	182656621
Chr1	182744157	182744704
Chr1	182780688	182781223
Chr1	182781133	182781642
Chr1	182834328	182834831
Chr1	183141705	183142235
Chr1	183772056	183772658
Chr1	183948020	183948468
Chr1	183948329	183949155
Chr1	183958544	183958945
Chr1	184212170	184213051
Chr1	184271155	184271835
Chr1	184339212	184339762
Chr1	190830354	190830710
Chr1	190830536	190830953
Chr1	190831315	190831824
Chr1	192514424	192514983
Chr1	192752357	192752830
Chr1	192849502	192850095
Chr1	193219301	193220205
Chr1	193398836	193399511
Chr1	193541741	193542215
Chr1	193542286	193542838
Chr1	193645150	193645810
Chr1	193962004	193962572
Chr1	194571391	194571956
Chr1	196956451	196956918
Chr10	4540494	4541024
Chr10	4542232	4542819
Chr10	5913854	5915089
Chr10	6372639	6373491
Chr10	7401204	7401642
Chr10	7500309	7500797
Chr10	7676136	7676707
Chr10	8238089	8238716
Chr10	12333493	12334141
Chr10	12588908	12589457
Chr10	12660838	12661724
Chr10	13193485	13194181
Chr10	17441589	17442254
Chr10	17442925	17443482
Chr10	17775227	17775754
Chr10	18038585	18039094
Chr10	19627069	19627615
Chr10	19654076	19654698
Chr10	20032310	20032842
Chr10	20067469	20068019
Chr10	21698655	21699292
Chr10	21714279	21714788
Chr10	23507789	23508135
Chr10	24473972	24474634
Chr10	27794556	27795077
Chr10	28863368	28864082
Chr10	29080850	29081219
Chr10	29081235	29082022
Chr10	29919647	29920608
Chr10	30319410	30320110
Chr10	30530090	30530615
Chr10	30530738	30531264
Chr10	33094580	33095152
Chr10	33739573	33740520
Chr10	34001878	34002274
Chr10	34016497	34017299
Chr10	36694139	36694749
Chr10	38685470	38686076
Chr10	39451248	39451752
Chr10	39452377	39453014
Chr10	39978043	39978705
Chr10	41170046	41170601
Chr10	41238324	41239691
Chr10	41529807	41530391
Chr10	42221682	42222303
Chr10	42481329	42481813
Chr10	43298649	43299294
Chr10	43621867	43622463
Chr10	45204858	45205320
Chr10	50312344	50312915
Chr10	52101367	52101875
Chr10	52137165	52137993
Chr10	53318057	53318633
Chr10	53349171	53349845
Chr10	55947871	55948573
Chr10	56097019	56097611
Chr10	57909288	57909952
Chr10	58684154	58684663
Chr10	58785774	58786514
Chr10	59078966	59079531
Chr10	59342178	59342764
Chr10	59414160	59414695
Chr10	59466261	59466952
Chr10	60845725	60846263
Chr10	61142941	61143526
Chr10	61158151	61158799
Chr10	62040523	62041298
Chr10	62254448	62255109
Chr10	62486141	62487195
Chr10	62623433	62623942
Chr10	62707984	62708345
Chr10	62800420	62800920
Chr10	62801366	62802083
Chr10	66559784	66560259
Chr10	66792202	66792697
Chr10	68814977	68815965
Chr10	70699510	70700105
Chr10	74674695	74675255
Chr10	75226921	75227570
Chr10	75355972	75356527
Chr10	75495267	75495744
Chr10	77084771	77085332
Chr10	77327317	77327706
Chr10	77472069	77472608
Chr10	77512797	77513384
Chr10	77531948	77532479
Chr10	79099884	79100517
Chr10	79132117	79132626
Chr10	79167102	79167740
Chr10	79179522	79179966
Chr10	79371318	79372013
Chr10	79565046	79565563
Chr10	79630284	79631053
Chr10	79689278	79689853
Chr10	79711830	79712298
Chr10	79895838	79896486
Chr10	80052537	80053171
Chr10	80118722	80119364
Chr10	80138632	80139164
Chr10	80217858	80218414
Chr10	80289198	80289851
Chr10	80363067	80363669
Chr10	80522554	80523036
Chr10	80568535	80569121
Chr10	80630105	80630587
Chr10	80639051	80639827
Chr10	80645450	80646123
Chr10	80655092	80655631
Chr10	80755620	80756094
Chr10	81063493	81064054
Chr10	81106145	81106641
Chr10	81590611	81591168
Chr10	81816904	81817378
Chr10	82092433	82092982
Chr10	82225365	82226178
Chr10	82226231	82226837
Chr10	82799775	82800367
Chr10	83902804	83903425
Chr10	84038635	84039101
Chr10	84085285	84086089
Chr10	85378826	85379887
Chr10	86168082	86168630
Chr10	90586350	90586897
Chr10	90634197	90635279
Chr10	93296522	93297156
Chr10	94150925	94151518
Chr10	94785624	94786368
Chr10	95025200	95025855
Chr10	95026421	95026915
Chr10	95403185	95403717
Chr10	96079312	96079982
Chr10	105277994	105278563
Chr10	108448322	108448902
Chr10	109195913	109196359
Chr10	110356765	110357448
Chr10	110446663	110447156
Chr10	110447012	110447466
Chr10	110601740	110602476
Chr10	111410287	111411276
Chr10	114687941	114688616
Chr10	114752205	114752653
Chr10	115633975	115634652
Chr10	116018510	116018971
Chr10	116500324	116500937
Chr10	116661126	116661740
Chr10	118676731	118677240
Chr10	120362810	120363501
Chr10	120801738	120802562
Chr10	121023352	121023895
Chr10	121062081	121062541
Chr10	121062883	121063588
Chr10	122115877	122116769
Chr10	122632462	122633256
Chr10	126408564	126409004
Chr10	126415196	126415657
Chr10	126558067	126558624
Chr10	126560338	126560801
Chr10	127114022	127114653
Chr10	127520176	127520926
Chr10	127758662	127759284
Chr10	127814293	127814699
Chr10	127895608	127896065
Chr10	128027260	128027789
Chr10	128063174	128063930
Chr10	128105977	128106470
Chr10	128328388	128329125
Chr10	128360073	128361063
Chr11	3102917	3103427
Chr11	3165383	3166541
Chr11	3231765	3232395
Chr11	3549080	3549620
Chr11	4086705	4087391
Chr11	4166571	4167128
Chr11	4646405	4646968
Chr11	4999372	4999864
Chr11	5344269	5344958
Chr11	5420819	5421356
Chr11	5606750	5607804
Chr11	5965007	5965494
Chr11	6099609	6100561
Chr11	6289229	6289736
Chr11	6315646	6316176
Chr11	6344010	6344734
Chr11	6428387	6428905
Chr11	6525678	6526203
Chr11	11361897	11362407
Chr11	12364591	12365136
Chr11	17158095	17158787
Chr11	17853405	17854009
Chr11	18920257	18920838
Chr11	20012332	20012864
Chr11	20101508	20102050
Chr11	20148901	20149558
Chr11	20149454	20150039
Chr11	20443104	20443659
Chr11	20531889	20532355
Chr11	20640918	20641260
Chr11	20641126	20641664
Chr11	20730600	20731120
Chr11	20730981	20731440
Chr11	22186611	22187105
Chr11	22758811	22759378
Chr11	22759315	22759846
Chr11	22871885	22872526
Chr11	23205878	23206418
Chr11	23397429	23398053
Chr11	23533175	23533828
Chr11	26109772	26110723
Chr11	26493241	26493781
Chr11	29073704	29074179
Chr11	29273499	29274417
Chr11	29592899	29593339
Chr11	30167332	30167909
Chr11	30654881	30655581
Chr11	30671645	30672190
Chr11	31571456	31571999
Chr11	32121519	32121893
Chr11	32247718	32248248
Chr11	32354901	32355457
Chr11	32355222	32355813
Chr11	32542651	32543281
Chr11	33061988	33062875
Chr11	33062800	33063149
Chr11	33080627	33081158
Chr11	33412962	33413705
Chr11	35582888	35584326
Chr11	35792903	35794136
Chr11	35821687	35822159
Chr11	40546996	40547748
Chr11	43198605	43199189
Chr11	45757859	45758555
Chr11	46125027	46125910
Chr11	46250354	46250975
Chr11	48613736	48614225
Chr11	48630474	48631014
Chr11	48647390	48647987
Chr11	48666746	48667411
Chr11	49016710	49017613
Chr11	49525649	49526457
Chr11	49660241	49661045
Chr11	49838405	49838914
Chr11	49944760	49945501
Chr11	50023742	50024660
Chr11	50105075	50105970
Chr11	50138766	50139323
Chr11	50139102	50140113
Chr11	50191105	50191716
Chr11	50243731	50244783
Chr11	51076916	51077269
Chr11	51103338	51103907
Chr11	51419943	51420590
Chr11	51420426	51421038
Chr11	51569870	51570418
Chr11	51813888	51814414
Chr11	51912211	51912709
Chr11	52045085	52046109
Chr11	52096307	52096645
Chr11	52096388	52097065
Chr11	53113320	53113999
Chr11	53163772	53164369
Chr11	53164237	53164630
Chr11	54117321	54117946
Chr11	54251306	54252527
Chr11	54600275	54601282
Chr11	54679855	54680313
Chr11	55017651	55018569
Chr11	55283020	55283631
Chr11	57615044	57615651
Chr11	57823255	57823588
Chr11	57917475	57918355
Chr11	58751738	58752281
Chr11	58752057	58752427
Chr11	58767938	58768520
Chr11	58976839	58977451
Chr11	59021742	59022327
Chr11	59041201	59041869
Chr11	59120366	59120841
Chr11	59475855	59476364
Chr11	59652701	59653437
Chr11	59988743	59989539
Chr11	60023705	60024219
Chr11	60165919	60166582
Chr11	60513080	60513885
Chr11	60540331	60540887
Chr11	60590325	60590861
Chr11	60623407	60623875
Chr11	60691823	60692358
Chr11	60726751	60727408
Chr11	60745426	60746035
Chr11	60835549	60836109
Chr11	60836044	60836875
Chr11	61221483	61221981
Chr11	61392394	61392926
Chr11	61667954	61669020
Chr11	61742623	61743112
Chr11	61743130	61743991
Chr11	62062346	62062781
Chr11	62094286	62095039
Chr11	62094830	62095383
Chr11	62270443	62270952
Chr11	62325065	62325924
Chr11	62352308	62352857
Chr11	62364327	62365295
Chr11	62416256	62416783
Chr11	62416497	62417407
Chr11	62461723	62462029
Chr11	62570024	62570505
Chr11	64792234	64792978
Chr11	64975873	64976595
Chr11	65601146	65601928
Chr11	67268520	67268937
Chr11	67735021	67735834
Chr11	68504808	68505370
Chr11	68665750	68666278
Chr11	68666021	68666682
Chr11	68781197	68782001
Chr11	68821230	68822260
Chr11	68886555	68887278
Chr11	68923912	68924427
Chr11	69209207	69209727
Chr11	69419091	69419697
Chr11	69446306	69447041
Chr11	69475725	69476192
Chr11	69484253	69484975
Chr11	69484745	69485322
Chr11	69485325	69485924
Chr11	69495018	69495627
Chr11	69571766	69572422
Chr11	69572166	69572626
Chr11	69727410	69727882
Chr11	69727765	69728221
Chr11	69794176	69794700
Chr11	69813875	69814388
Chr11	70222432	70223719
Chr11	70376269	70376813
Chr11	70460056	70460572
Chr11	70460659	70461136
Chr11	70500635	70501149
Chr11	70501011	70501575
Chr11	70513633	70514115
Chr11	70577775	70578313
Chr11	70658177	70659457
Chr11	70783072	70783627
Chr11	70832015	70832888
Chr11	70832633	70833142
Chr11	70832949	70833480
Chr11	72224560	72225022
Chr11	72420623	72421132
Chr11	72832393	72833050
Chr11	72861251	72862057
Chr11	74463161	74463698
Chr11	74536433	74537461
Chr11	74537817	74538361
Chr11	74584171	74584802
Chr11	74709942	74710566
Chr11	74739214	74740091
Chr11	75267775	75268425
Chr11	75323614	75324075
Chr11	75344490	75345301
Chr11	75345124	75345632
Chr11	75401494	75402340
Chr11	75492631	75493449
Chr11	75546958	75547467
Chr11	76057124	76057656
Chr11	76212245	76212808
Chr11	76660067	76660617
Chr11	77420553	77421482
Chr11	77845666	77846270
Chr11	77851294	77851903
Chr11	77996636	77997194
Chr11	78002571	78003068
Chr11	78075114	78075592
Chr11	78141821	78142840
Chr11	78156850	78157547
Chr11	78324613	78325367
Chr11	78325630	78326475
Chr11	78510478	78510998
Chr11	78787172	78787702
Chr11	78959282	78960096
Chr11	79067809	79068324
Chr11	79404532	79405317
Chr11	79517460	79518157
Chr11	79518115	79518566
Chr11	79893769	79894600
Chr11	79997185	79998179
Chr11	80022439	80023252
Chr11	80114219	80114842
Chr11	80114543	80114969
Chr11	80196659	80197389
Chr11	80242038	80243322
Chr11	82594545	82595218
Chr11	83223200	83223583
Chr11	83286320	83287097
Chr11	83777828	83778367
Chr11	83993185	83993893
Chr11	84632219	84632670
Chr11	84642159	84642699
Chr11	84952809	84953237
Chr11	84953029	84953344
Chr11	85048185	85048709
Chr11	85124752	85125402
Chr11	85337489	85337970
Chr11	85645573	85646130
Chr11	85731617	85732084
Chr11	86013747	86015001
Chr11	86171210	86171883
Chr11	86298052	86298765
Chr11	86496729	86497466
Chr11	86570301	86571184
Chr11	86571281	86571876
Chr11	86806336	86806682
Chr11	86806418	86806738
Chr11	86806646	86807273
Chr11	86940678	86941441
Chr11	87235993	87236690
Chr11	87240018	87240571
Chr11	87256641	87257198
Chr11	87262026	87262715
Chr11	87275707	87276319
Chr11	87405517	87406021
Chr11	87475962	87476664
Chr11	87800619	87801168
Chr11	87861380	87861930
Chr11	87881810	87882437
Chr11	88725309	88725964
Chr11	88835118	88835642
Chr11	88921191	88922010
Chr11	90110602	90111352
Chr11	90499328	90499867
Chr11	93747391	93748014
Chr11	93857282	93857671
Chr11	94072442	94073194
Chr11	94189180	94189797
Chr11	94537741	94538887
Chr11	95171067	95171646
Chr11	95198145	95198706
Chr11	95574257	95574796
Chr11	95684812	95686001
Chr11	95926130	95926759
Chr11	95936530	95937099
Chr11	96558205	96558719
Chr11	96650428	96650947
Chr11	96805396	96806321
Chr11	96816110	96817365
Chr11	97012254	97012786
Chr11	97048887	97049430
Chr11	97141102	97141662
Chr11	97177019	97178172
Chr11	97223506	97224159
Chr11	97276758	97277435
Chr11	97520281	97520744
Chr11	97520546	97520961
Chr11	97627833	97628604
Chr11	97702454	97703412
Chr11	97746071	97746888
Chr11	97849545	97850385
Chr11	97889011	97889745
Chr11	98010349	98011029
Chr11	98054206	98054746
Chr11	98054790	98055258
Chr11	98063968	98064655
Chr11	98066040	98066400
Chr11	98261397	98261930
Chr11	98308774	98309590
Chr11	98448131	98448681
Chr11	98543836	98544405
Chr11	98603012	98603454
Chr11	98655775	98656274
Chr11	98843552	98843961
Chr11	98843708	98844319
Chr11	98885161	98885712
Chr11	99091334	99091905
Chr11	100181089	100181500
Chr11	100181335	100181847
Chr11	100258716	100259184
Chr11	100333629	100334200
Chr11	100388365	100389031
Chr11	100388763	100389340
Chr11	100573341	100573908
Chr11	100598995	100599618
Chr11	100800298	100800905
Chr11	100930983	100931961
Chr11	100956099	100957287
Chr11	101087229	101087805
Chr11	101177145	101177605
Chr11	101177373	101177939
Chr11	101646156	101646703
Chr11	102091043	102091572
Chr11	102157213	102157718
Chr11	102268901	102269867
Chr11	102291121	102291774
Chr11	102291620	102292315
Chr11	102416500	102417581
Chr11	102465595	102466160
Chr11	102786049	102786641
Chr11	102786824	102787284
Chr11	102889703	102890245
Chr11	102977314	102977769
Chr11	102993761	102994261
Chr11	103031939	103032507
Chr11	103273587	103274131
Chr11	103814761	103815493
Chr11	104303641	104304325
Chr11	104330177	104330834
Chr11	105042330	105042723
Chr11	105201528	105202128
Chr11	105945819	105946367
Chr11	106133639	106134229
Chr11	106348779	106349281
Chr11	106362102	106363108
Chr11	106362810	106363204
Chr11	106473875	106474303
Chr11	106639866	106640978
Chr11	106649480	106650028
Chr11	106650109	106650666
Chr11	106781431	106781869
Chr11	106781678	106782210
Chr11	106860522	106860857
Chr11	106873091	106874440
Chr11	107409147	107409632
Chr11	107409414	107409951
Chr11	108285868	108286216
Chr11	108872841	108873527
Chr11	109224010	109224557
Chr11	109512206	109512823
Chr11	113510809	113511264
Chr11	114530417	114531150
Chr11	115024280	115025192
Chr11	115243076	115243981
Chr11	115264924	115265471
Chr11	115274627	115275261
Chr11	115375277	115376028
Chr11	115396730	115397474
Chr11	115464635	115465323
Chr11	115465106	115465615
Chr11	115626392	115626970
Chr11	115626672	115627639
Chr11	115873618	115874162
Chr11	115885355	115886257
Chr11	115891458	115892086
Chr11	116274074	116274832
Chr11	116351019	116351772
Chr11	116442201	116442898
Chr11	116532899	116533518
Chr11	116714059	116714782
Chr11	116780075	116780565
Chr11	116976429	116976937
Chr11	117641627	117642154
Chr11	117671244	117671980
Chr11	118884242	118885059
Chr11	119161155	119161475
Chr11	119161321	119162178
Chr11	119352587	119353059
Chr11	119464232	119464931
Chr11	119464645	119465105
Chr11	119774964	119775911
Chr11	119804061	119804707
Chr11	119959418	119960146
Chr11	119960114	119960766
Chr11	120050692	120051197
Chr11	120166175	120166950
Chr11	120239555	120239979
Chr11	120239857	120240235
Chr11	120345806	120346720
Chr11	120353052	120354148
Chr11	120433690	120434920
Chr11	120434664	120435609
Chr11	120459541	120460276
Chr11	120485723	120486443
Chr11	120494550	120495060
Chr11	120534168	120534731
Chr11	120534565	120535375
Chr11	120645073	120645626
Chr11	120657336	120657843
Chr11	120684530	120685224
Chr11	120684996	120685577
Chr11	120852235	120852763
Chr11	121065601	121066143
Chr11	121097932	121098511
Chr11	121120829	121121388
Chr11	121215274	121216397
Chr12	3309818	3310372
Chr12	3426754	3427295
Chr12	4233910	4234438
Chr12	4599416	4599964
Chr12	4599804	4600418
Chr12	4925173	4925651
Chr12	8506367	8507008
Chr12	8681043	8681550
Chr12	8681739	8682424
Chr12	8682202	8682685
Chr12	8928763	8929311
Chr12	9036692	9037332
Chr12	11462542	11463253
Chr12	12908536	12909344
Chr12	16901516	16902264
Chr12	17273231	17273778
Chr12	21117509	21117889
Chr12	21292367	21293125
Chr12	21423002	21423522
Chr12	25336102	25336638
Chr12	30219906	30220318
Chr12	32634293	32634866
Chr12	32745909	32746321
Chr12	35731714	35732217
Chr12	37043434	37043855
Chr12	40764029	40764704
Chr12	40948067	40948726
Chr12	40949278	40949976
Chr12	41430605	41431091
Chr12	45310371	45311143
Chr12	45370013	45370596
Chr12	52792339	52793014
Chr12	55667847	55668599
Chr12	55797397	55798113
Chr12	56500510	56501004
Chr12	56593129	56593699
Chr12	56661350	56661842
Chr12	56921670	56922207
Chr12	56937195	56937804
Chr12	57446528	57446930
Chr12	60167806	60168421
Chr12	66018755	66019264
Chr12	66174416	66175059
Chr12	70285392	70285924
Chr12	70782455	70782998
Chr12	70825453	70825984
Chr12	70993457	70994182
Chr12	71087696	71088176
Chr12	71212552	71213121
Chr12	71884562	71885306
Chr12	72075552	72076114
Chr12	72238326	72238845
Chr12	73861463	73862098
Chr12	73862241	73862773
Chr12	73955535	73956175
Chr12	74046481	74047048
Chr12	75008806	75009369
Chr12	76769919	76770860
Chr12	76919171	76919899
Chr12	77923427	77923756
Chr12	78003045	78004164
Chr12	78338942	78339555
Chr12	78339976	78340516
Chr12	79963765	79964511
Chr12	80107573	80108428
Chr12	80272458	80272926
Chr12	80273313	80273845
Chr12	81744257	81744822
Chr12	81891370	81891874
Chr12	81892880	81893415
Chr12	82046649	82047164
Chr12	82127665	82128197
Chr12	82584709	82585903
Chr12	82632664	82633308
Chr12	82960999	82961519
Chr12	82961359	82961917
Chr12	85029033	85030191
Chr12	85262467	85262929
Chr12	85291790	85292371
Chr12	86451806	86452338
Chr12	88225325	88225859
Chr12	88540622	88541299
Chr12	88607547	88608107
Chr12	88784286	88784902
Chr12	88785369	88785908
Chr12	92622904	92623464
Chr12	92828113	92828700
Chr12	93016982	93017851
Chr12	99985107	99985622
Chr12	100138424	100138962
Chr12	100139241	100139787
Chr12	100649864	100650322
Chr12	101121932	101122268
Chr12	101122617	101123191
Chr12	101437354	101438252
Chr12	101758495	101759032
Chr12	101962880	101963380
Chr12	101963397	101964004
Chr12	102321123	102321692
Chr12	102321437	102322083
Chr12	103968877	103969257
Chr12	103996089	103996589
Chr12	104116059	104116918
Chr12	106270660	106271271
Chr12	107022804	107023470
Chr12	109417887	109418418
Chr12	110073737	110074389
Chr12	111684774	111685256
Chr12	111829434	111830381
Chr12	111839523	111840083
Chr12	111934078	111934864
Chr12	111963210	111963742
Chr12	111976229	111976828
Chr12	112088378	112088936
Chr12	112127338	112127926
Chr12	112216633	112217335
Chr12	112404616	112405172
Chr12	112776269	112776807
Chr12	112812655	112813098
Chr12	112950799	112951455
Chr12	113145887	113146373
Chr12	113960264	113960950
Chr12	114067185	114067719
Chr12	114214619	114215712
Chr12	114252142	114252717
Chr12	117519584	117520450
Chr12	118772276	118772972
Chr12	119539964	119540584
Chr13	5860032	5860656
Chr13	5862009	5862651
Chr13	8884689	8885221
Chr13	9093041	9093735
Chr13	9275891	9276415
Chr13	9762982	9763477
Chr13	14046754	14047397
Chr13	15518923	15519566
Chr13	18035578	18036143
Chr13	19487926	19488575
Chr13	21265075	21265542
Chr13	21351281	21351997
Chr13	21367004	21367467
Chr13	21801864	21802717
Chr13	21871323	21871813
Chr13	21872063	21872763
Chr13	21878879	21879566
Chr13	22127253	22127825
Chr13	23390571	23391047
Chr13	23492565	23493124
Chr13	23515360	23515918
Chr13	23610388	23610983
Chr13	23635480	23636582
Chr13	23647403	23648031
Chr13	23663707	23664259
Chr13	23673126	23673709
Chr13	23673833	23674451
Chr13	23714088	23714684
Chr13	23790097	23790697
Chr13	23830412	23830988
Chr13	23836251	23836730
Chr13	24853352	24853918
Chr13	24892918	24893489
Chr13	24923445	24923977
Chr13	30077162	30077598
Chr13	30636728	30637298
Chr13	34169562	34170232
Chr13	34169936	34170429
Chr13	34436292	34436972
Chr13	35830530	35831066
Chr13	38619972	38620495
Chr13	38750411	38751011
Chr13	41209393	41209954
Chr13	42147850	42148367
Chr13	43577120	43577435
Chr13	44827073	44827553
Chr13	44827569	44828153
Chr13	45484731	45485465
Chr13	45588803	45589460
Chr13	45865057	45865543
Chr13	46764779	46765324
Chr13	46822723	46823555
Chr13	47024686	47025159
Chr13	47201238	47201691
Chr13	48641482	48642023
Chr13	48720301	48721300
Chr13	49282632	49283293
Chr13	49310878	49311459
Chr13	49436749	49437389
Chr13	49749273	49749748
Chr13	49777329	49777963
Chr13	51740382	51740921
Chr13	51746910	51747468
Chr13	51941677	51942284
Chr13	54569809	54570322
Chr13	54723038	54723714
Chr13	54788219	54788779
Chr13	54788543	54789086
Chr13	54789113	54789645
Chr13	54794720	54795325
Chr13	54839312	54839734
Chr13	55422913	55423428
Chr13	55463400	55464092
Chr13	55463877	55464336
Chr13	55546043	55546582
Chr13	55614049	55614613
Chr13	55614415	55614969
Chr13	55671899	55672492
Chr13	55794110	55795715
Chr13	56236504	56236971
Chr13	56623958	56624718
Chr13	56804317	56804858
Chr13	59871206	59871811
Chr13	59924084	59924616
Chr13	63916491	63917063
Chr13	64253720	64254104
Chr13	64471062	64471757
Chr13	67379407	67379903
Chr13	67963986	67964614
Chr13	73465999	73466447
Chr13	73468385	73468892
Chr13	73483061	73483797
Chr13	74199332	74199892
Chr13	75844848	75845340
Chr13	81922153	81922829
Chr13	85428325	85428752
Chr13	91363281	91363739
Chr13	93961852	93962313
Chr13	94827456	94827867
Chr13	97842509	97842922
Chr13	98011971	98012518
Chr13	99032532	99033107
Chr13	99695654	99696405
Chr13	100115237	100115753
Chr13	101514054	101514721
Chr13	101602055	101602630
Chr13	103695182	103696297
Chr13	104564198	104564723
Chr13	106234143	106235065
Chr13	107737636	107738358
Chr13	108680926	108681427
Chr13	108948212	108948955
Chr13	109083242	109083934
Chr13	110029859	110030231
Chr13	111070369	111070899
Chr13	111184890	111185487
Chr13	112599415	112599900
Chr13	113442299	113442837
Chr13	113835955	113836742
Chr13	114374287	114374778
Chr13	114584320	114584910
Chr13	114584620	114585278
Chr13	119175593	119176214
Chr13	120197648	120197959
Chr14	8930589	8931279
Chr14	11285589	11286032
Chr14	14845032	14845708
Chr14	17197546	17198048
Chr14	19071072	19071703
Chr14	21364599	21365917
Chr14	21514379	21514973
Chr14	22667530	22668098
Chr14	24823351	24824007
Chr14	24823783	24824196
Chr14	25064072	25065029
Chr14	27353872	27354503
Chr14	27398919	27399557
Chr14	27782714	27783881
Chr14	28241880	28242667
Chr14	28243318	28243801
Chr14	28435409	28436113
Chr14	31638624	31639235
Chr14	31814429	31815007
Chr14	31832244	31832739
Chr14	32063627	32063980
Chr14	32064493	32065560
Chr14	32309059	32309464
Chr14	32899096	32900146
Chr14	35123787	35124283
Chr14	35125991	35126597
Chr14	35362107	35362833
Chr14	35486939	35487481
Chr14	35488093	35488395
Chr14	37781525	37782050
Chr14	45839401	45839997
Chr14	46277350	46277881
Chr14	47407589	47408128
Chr14	48092324	48092678
Chr14	48092465	48093140
Chr14	48269234	48269659
Chr14	48875881	48876492
Chr14	49065898	49066470
Chr14	49833834	49834297
Chr14	51544357	51544913
Chr14	52816894	52817341
Chr14	52817492	52818010
Chr14	55044902	55045578
Chr14	55250762	55251239
Chr14	55304924	55305580
Chr14	55495123	55495631
Chr14	55512842	55513417
Chr14	55513226	55513554
Chr14	55544652	55545161
Chr14	56177912	56178899
Chr14	56179140	56179672
Chr14	56291094	56291890
Chr14	56340680	56341211
Chr14	57021347	57021889
Chr14	57287578	57288440
Chr14	58508494	58509002
Chr14	59819626	59820367
Chr14	59820662	59821260
Chr14	60059767	60060220
Chr14	63379501	63380033
Chr14	63741260	63742079
Chr14	63796406	63797138
Chr14	64204935	64205827
Chr14	65977326	65978234
Chr14	67487310	67488057
Chr14	67690908	67691414
Chr14	68225933	68226414
Chr14	68701664	68702260
Chr14	69902546	69903199
Chr14	70008870	70009347
Chr14	70131802	70132474
Chr14	70553010	70553640
Chr14	70998655	70999857
Chr14	73638342	73638950
Chr14	73638720	73639194
Chr14	73639181	73639703
Chr14	75346694	75347366
Chr14	76551921	76552792
Chr14	77556498	77557154
Chr14	78676287	78676737
Chr14	79880577	79881453
Chr14	79987036	79987583
Chr14	87815583	87816153
Chr14	99699395	99700294
Chr14	102330195	102330919
Chr14	104049357	104050008
Chr14	105575949	105576483
Chr14	120877077	120877526
Chr14	121777652	121778057
Chr14	122276740	122277402
Chr14	122277790	122278401
Chr14	122506240	122506704
Chr14	123381696	123382540
Chr15	3945354	3945940
Chr15	5093499	5093838
Chr15	6574645	6575093
Chr15	9001015	9001440
Chr15	11925387	11925881
Chr15	12047546	12048149
Chr15	12251074	12251651
Chr15	12754034	12754566
Chr15	16658368	16658752
Chr15	25261583	25262065
Chr15	25772961	25773435
Chr15	25914062	25914535
Chr15	26482420	26482786
Chr15	27834697	27835361
Chr15	35232269	35232763
Chr15	35867490	35868002
Chr15	36212260	36212992
Chr15	36723676	36724063
Chr15	36867962	36868578
Chr15	36935758	36936431
Chr15	38230279	38230872
Chr15	38448740	38449391
Chr15	38591612	38592183
Chr15	38943793	38944293
Chr15	39774958	39775435
Chr15	39775190	39775684
Chr15	41662357	41662874
Chr15	43309098	43309692
Chr15	44259542	44260059
Chr15	55389262	55390069
Chr15	57525529	57525928
Chr15	58720335	58720794
Chr15	59205312	59205979
Chr15	61816692	61817422
Chr15	61871061	61871592
Chr15	63828989	63829792
Chr15	63891607	63892054
Chr15	64143817	64144326
Chr15	66117934	66118443
Chr15	66408918	66409501
Chr15	66801185	66801726
Chr15	68758788	68759098
Chr15	72920718	72921255
Chr15	73253149	73253708
Chr15	73475761	73476323
Chr15	73578544	73579113
Chr15	74502693	74503296
Chr15	75899724	75900355
Chr15	75910327	75911484
Chr15	76173808	76174365
Chr15	76307718	76308442
Chr15	76540502	76541132
Chr15	76545778	76546232
Chr15	76648161	76648591
Chr15	77786762	77787302
Chr15	78707536	78708092
Chr15	78744234	78744763
Chr15	78813529	78813975
Chr15	78858275	78858912
Chr15	78892814	78893679
Chr15	78939575	78939906
Chr15	79664304	79664787
Chr15	79801055	79801722
Chr15	79906803	79907439
Chr15	80004234	80004743
Chr15	80085931	80086461
Chr15	80541075	80541661
Chr15	81020369	81021322
Chr15	81353307	81353845
Chr15	81415731	81416620
Chr15	81688295	81688803
Chr15	81702814	81703438
Chr15	81931637	81932091
Chr15	81958605	81959128
Chr15	82074418	82075301
Chr15	82176373	82176830
Chr15	82184225	82184981
Chr15	83081643	83082266
Chr15	83180148	83180740
Chr15	83262750	83263339
Chr15	84511312	84512254
Chr15	84753702	84754476
Chr15	86043647	86044670
Chr15	88919259	88919675
Chr15	88919384	88919868
Chr15	89010756	89011234
Chr15	89145313	89145828
Chr15	91022163	91022665
Chr15	92174687	92175565
Chr15	94234228	94234916
Chr15	94419915	94420399
Chr15	95680233	95680693
Chr15	96001887	96002468
Chr15	96472989	96473521
Chr15	98364317	98364998
Chr15	98783545	98784139
Chr15	98860238	98861075
Chr15	98956471	98957014
Chr15	99125306	99125866
Chr15	99200303	99200917
Chr15	99287826	99288252
Chr15	99304020	99304700
Chr15	99481563	99482167
Chr15	99500750	99501597
Chr15	99532486	99533075
Chr15	99556095	99556649
Chr15	99602463	99603076
Chr15	99803158	99803843
Chr15	99868903	99869724
Chr15	100058546	100059063
Chr15	100252805	100253677
Chr15	100325300	100326023
Chr15	100445937	100446532
Chr15	100591951	100592591
Chr15	100701251	100702267
Chr15	101004412	101005017
Chr15	101004719	101005027
Chr15	101054521	101055130
Chr15	101904249	101904801
Chr15	102235623	102236182
Chr15	102455536	102455998
Chr15	103153414	103154095
Chr16	4212632	4213119
Chr16	4213186	4213565
Chr16	4214007	4214542
Chr16	4420005	4420539
Chr16	4559000	4559503
Chr16	4594655	4595270
Chr16	4683965	4684518
Chr16	4879787	4880358
Chr16	4886212	4886940
Chr16	4939000	4939731
Chr16	5050147	5050671
Chr16	5203688	5204306
Chr16	5233544	5234578
Chr16	8829355	8829962
Chr16	8830202	8830734
Chr16	10411873	10412458
Chr16	10542584	10543252
Chr16	10785231	10785721
Chr16	10835001	10835572
Chr16	10992263	10993348
Chr16	11066287	11066986
Chr16	11253525	11254077
Chr16	11322843	11323625
Chr16	13256499	13257067
Chr16	13447729	13448288
Chr16	13448126	13448660
Chr16	13672028	13672616
Chr16	14163006	14163715
Chr16	15594014	15594729
Chr16	16213281	16213824
Chr16	16302906	16303834
Chr16	16559561	16560045
Chr16	16559794	16560398
Chr16	17069824	17070378
Chr16	17070137	17070684
Chr16	17131858	17132604
Chr16	17233512	17234544
Chr16	17405370	17406062
Chr16	17530733	17531268
Chr16	17833595	17833900
Chr16	17890872	17891591
Chr16	17891338	17891906
Chr16	17921925	17922819
Chr16	18088372	18089380
Chr16	18127290	18127837
Chr16	18248272	18248975
Chr16	18288252	18289488
Chr16	18348197	18348759
Chr16	18392546	18393024
Chr16	18392816	18393470
Chr16	18811201	18811874
Chr16	18836513	18837150
Chr16	18877152	18877669
Chr16	18877562	18878106
Chr16	20097523	20098350
Chr16	20516916	20517734
Chr16	20672691	20673261
Chr16	20732795	20733304
Chr16	21423195	21423916
Chr16	21694659	21695247
Chr16	22439309	22439851
Chr16	22857544	22858352
Chr16	23107471	23108628
Chr16	23114112	23114621
Chr16	23114459	23115013
Chr16	23127704	23128440
Chr16	24393543	24393927
Chr16	25059316	25059826
Chr16	25523351	25523945
Chr16	26105178	26105757
Chr16	27388887	27389365
Chr16	29813853	29814586
Chr16	30008758	30009318
Chr16	30388461	30388844
Chr16	30388593	30389129
Chr16	30550045	30550755
Chr16	30599706	30600455
Chr16	31081107	31081652
Chr16	31200613	31201399
Chr16	31663201	31663921
Chr16	31663783	31664676
Chr16	31947713	31948755
Chr16	32078363	32079565
Chr16	32245952	32247332
Chr16	32332221	32333192
Chr16	32430477	32430998
Chr16	32608945	32609620
Chr16	32914048	32914783
Chr16	33062425	33062975
Chr16	33185079	33185774
Chr16	33251396	33252111
Chr16	33829642	33830146
Chr16	33829944	33830500
Chr16	35022447	35023153
Chr16	35541289	35541798
Chr16	35769010	35769439
Chr16	35770325	35770910
Chr16	35983352	35983923
Chr16	36071393	36071786
Chr16	36071677	36072214
Chr16	36828347	36829040
Chr16	36875132	36876186
Chr16	37539447	37539928
Chr16	37539808	37540366
Chr16	37868269	37868873
Chr16	42876094	42876681
Chr16	44056052	44056834
Chr16	44173191	44173774
Chr16	44724252	44724792
Chr16	44724584	44725238
Chr16	46010137	46010715
Chr16	48750396	48750991
Chr16	48993661	48994199
Chr16	49855251	49855732
Chr16	49855677	49856535
Chr16	50528898	50529271
Chr16	50736449	50737129
Chr16	55822223	55822796
Chr16	55894892	55895677
Chr16	55973788	55974355
Chr16	55974100	55974533
Chr16	56029371	56029936
Chr16	56717121	56717609
Chr16	57269846	57270442
Chr16	58408460	58409016
Chr16	58670310	58671107
Chr16	59599863	59600491
Chr16	64797047	64797381
Chr16	65562534	65563059
Chr16	70314158	70314746
Chr16	78575736	78576633
Chr16	84735079	84735622
Chr16	84776133	84776572
Chr16	85549577	85550061
Chr16	85549940	85550794
Chr16	87354330	87354885
Chr16	87494890	87495607
Chr16	87699057	87700032
Chr16	90144129	90144586
Chr16	90220648	90221323
Chr16	91011318	91011878
Chr16	91044265	91044780
Chr16	91597442	91598104
Chr16	91688568	91689176
Chr16	92466003	92466541
Chr16	93712066	93712709
Chr16	93832395	93832901
Chr16	94534770	94535376
Chr16	94592195	94593044
Chr16	94747522	94748117
Chr16	94748174	94748825
Chr16	94790538	94791092
Chr16	95923408	95924126
Chr16	95923926	95924831
Chr16	97391929	97392430
Chr16	98072772	98073283
Chr17	3114857	3115525
Chr17	3326836	3327330
Chr17	6079328	6079875
Chr17	7031804	7032276
Chr17	7032014	7032811
Chr17	8476005	8476898
Chr17	12962161	12962835
Chr17	13107955	13108599
Chr17	13109171	13109829
Chr17	13153178	13153735
Chr17	13184685	13185148
Chr17	13185420	13185894
Chr17	13869500	13870108
Chr17	15633879	15634397
Chr17	15663655	15664356
Chr17	21669145	21669720
Chr17	22561475	22561945
Chr17	22875851	22876581
Chr17	23701685	23702080
Chr17	23836735	23837306
Chr17	23863328	23863860
Chr17	23940358	23940908
Chr17	23941313	23941764
Chr17	24278076	24278661
Chr17	24563466	24564028
Chr17	24591801	24592218
Chr17	24686879	24687909
Chr17	24806485	24807122
Chr17	24833022	24833591
Chr17	24856525	24857335
Chr17	26056175	26056742
Chr17	26206015	26206523
Chr17	26250148	26250723
Chr17	26275562	26276636
Chr17	26389748	26390435
Chr17	26813911	26814410
Chr17	26852807	26853339
Chr17	27069902	27070419
Chr17	27075891	27076565
Chr17	27076275	27076993
Chr17	27109593	27110470
Chr17	27340992	27341317
Chr17	27702170	27702610
Chr17	28314003	28314752
Chr17	28758726	28759244
Chr17	28828235	28828820
Chr17	29169245	29169960
Chr17	29484319	29484839
Chr17	29627634	29628143
Chr17	29686595	29687329
Chr17	32421221	32421764
Chr17	32457599	32458244
Chr17	32501007	32501541
Chr17	33494738	33495457
Chr17	33495351	33495930
Chr17	33765921	33766393
Chr17	33821936	33822439
Chr17	33961145	33961676
Chr17	34092220	34092769
Chr17	34161226	34161764
Chr17	34255958	34256555
Chr17	34724159	34724618
Chr17	34784067	34784589
Chr17	35089005	35089631
Chr17	35118718	35119299
Chr17	35137815	35138325
Chr17	35271423	35271856
Chr17	35301159	35301961
Chr17	35378659	35379191
Chr17	35643847	35644636
Chr17	36033624	36034058
Chr17	36033925	36034275
Chr17	36053719	36054263
Chr17	36408237	36408958
Chr17	37003669	37004124
Chr17	37407302	37407905
Chr17	39980297	39980835
Chr17	39980853	39983242
Chr17	39984951	39985910
Chr17	41071387	41071919
Chr17	43013063	43013652
Chr17	44914728	44915210
Chr17	45570114	45570632
Chr17	45643624	45644192
Chr17	45701156	45701720
Chr17	45709663	45709965
Chr17	45709880	45710430
Chr17	45732006	45732484
Chr17	46692761	46693294
Chr17	46817434	46817988
Chr17	46848299	46848808
Chr17	46888249	46889323
Chr17	47766468	47767047
Chr17	47831899	47832585
Chr17	49567588	49568255
Chr17	53618551	53619162
Chr17	56148522	56149031
Chr17	56357931	56358433
Chr17	56442725	56443186
Chr17	56443054	56443421
Chr17	56443202	56443659
Chr17	56465375	56465926
Chr17	56723530	56723898
Chr17	56765800	56766416
Chr17	57150139	57151168
Chr17	63211648	63212218
Chr17	64213188	64213826
Chr17	64680589	64681287
Chr17	65962493	65962964
Chr17	66233774	66234277
Chr17	66299712	66300667
Chr17	66425825	66426249
Chr17	66583183	66583865
Chr17	66695005	66695621
Chr17	69506052	69506610
Chr17	69625331	69625780
Chr17	69625616	69625970
Chr17	71350284	71350732
Chr17	71351100	71351657
Chr17	71901274	71902023
Chr17	71965450	71966157
Chr17	71966391	71967297
Chr17	72131861	72132332
Chr17	74694496	74695127
Chr17	74716017	74716534
Chr17	74738498	74738940
Chr17	74888701	74889260
Chr17	75393433	75394014
Chr17	78786186	78786935
Chr17	79135455	79136070
Chr17	80348993	80349467
Chr17	80461137	80461557
Chr17	80606117	80606968
Chr17	81132353	81132904
Chr17	81343879	81344582
Chr17	83750173	83750850
Chr17	84260917	84261376
Chr17	84587008	84587546
Chr17	84865113	84866204
Chr17	85189493	85189990
Chr17	87506776	87507461
Chr17	87845633	87846284
Chr17	88036385	88037109
Chr17	88071531	88072475
Chr17	89024212	89024959
Chr18	3507884	3508389
Chr18	5479831	5480464
Chr18	6135334	6136003
Chr18	6241077	6241637
Chr18	6490019	6490599
Chr18	6490413	6490945
Chr18	9449526	9450076
Chr18	10029670	10030206
Chr18	10181615	10181975
Chr18	11997836	11998454
Chr18	12899516	12900223
Chr18	13099909	13100425
Chr18	14840976	14841490
Chr18	14841425	14841908
Chr18	14941413	14942175
Chr18	21159646	21160292
Chr18	21458033	21458761
Chr18	24178864	24179434
Chr18	24279211	24279678
Chr18	24364421	24364930
Chr18	24761646	24762105
Chr18	31793890	31794536
Chr18	31919381	31919948
Chr18	31963718	31964250
Chr18	32070324	32071053
Chr18	32227297	32227965
Chr18	33372569	33373755
Chr18	33954397	33954922
Chr18	34380446	34380955
Chr18	34810990	34811476
Chr18	34936802	34937373
Chr18	34937156	34937621
Chr18	35091241	35091871
Chr18	35112417	35112934
Chr18	35278425	35279498
Chr18	35721817	35722439
Chr18	35758124	35758832
Chr18	36440282	36440784
Chr18	36903746	36904359
Chr18	36943272	36943729
Chr18	38094512	38095188
Chr18	38409722	38410274
Chr18	38498159	38498739
Chr18	38578483	38578982
Chr18	42671031	42671540
Chr18	43895838	43896203
Chr18	44540047	44540524
Chr18	44894565	44895045
Chr18	46684965	46685536
Chr18	49906409	49906990
Chr18	49914809	49915341
Chr18	49992156	49992720
Chr18	53335859	53336459
Chr18	56590872	56591738
Chr18	57514334	57514879
Chr18	60685738	60686225
Chr18	60719868	60720890
Chr18	60907271	60907721
Chr18	61225263	61225736
Chr18	61336390	61336846
Chr18	61370503	61371620
Chr18	63082583	63083079
Chr18	65047199	65047566
Chr18	65047457	65047813
Chr18	66049983	66050440
Chr18	66161864	66162540
Chr18	67448780	67449288
Chr18	67550209	67550742
Chr18	67550470	67550941
Chr18	67934514	67935078
Chr18	68459440	68459977
Chr18	69503630	69504138
Chr18	69938855	69939513
Chr18	70689363	70690046
Chr18	70727910	70728579
Chr18	73731511	73732038
Chr18	76400863	76401417
Chr18	78012585	78013124
Chr18	78028948	78029387
Chr18	78045250	78045722
Chr18	78045468	78046048
Chr18	80347784	80348398
Chr18	80403526	80404086
Chr18	80665770	80666494
Chr18	80666280	80666809
Chr18	80764110	80764620
Chr18	81129962	81130848
Chr18	81183043	81183575
Chr18	82112981	82113605
Chr18	84758811	84759303
Chr19	3282426	3283026
Chr19	3685990	3686734
Chr19	3768035	3768551
Chr19	3851499	3852276
Chr19	3912386	3912870
Chr19	4162966	4163592
Chr19	4192030	4192707
Chr19	4192420	4192740
Chr19	4200727	4201725
Chr19	4201535	4202143
Chr19	4395829	4396391
Chr19	4756237	4756914
Chr19	4809338	4810321
Chr19	4878537	4879046
Chr19	5106238	5107116
Chr19	5424525	5425013
Chr19	5567702	5568109
Chr19	5567898	5568407
Chr19	5609741	5610403
Chr19	5637395	5637914
Chr19	5729242	5729755
Chr19	5770792	5771557
Chr19	6084540	6085061
Chr19	6084998	6085643
Chr19	6117676	6118360
Chr19	6140493	6141344
Chr19	6141132	6141690
Chr19	6341021	6341530
Chr19	6984113	6984666
Chr19	7061518	7062231
Chr19	7280331	7280878
Chr19	7315166	7315706
Chr19	7415376	7416300
Chr19	7416389	7416880
Chr19	7457131	7457986
Chr19	7491437	7492040
Chr19	7557251	7557833
Chr19	7568822	7569432
Chr19	8787957	8788490
Chr19	8815822	8816896
Chr19	8994743	8995533
Chr19	9973478	9974090
Chr19	10057048	10057546
Chr19	10463594	10464123
Chr19	10599661	10600382
Chr19	10679986	10680714
Chr19	10763081	10763830
Chr19	10969631	10970218
Chr19	11987077	11987688
Chr19	12086022	12086572
Chr19	12086373	12086837
Chr19	21347062	21347571
Chr19	21727659	21728157
Chr19	21728518	21729054
Chr19	23581633	23582093
Chr19	23761775	23762386
Chr19	23832763	23833462
Chr19	24105127	24105650
Chr19	24551427	24551923
Chr19	27291354	27291855
Chr19	29121840	29122557
Chr19	29175242	29175762
Chr19	29175889	29176284
Chr19	29326107	29326782
Chr19	29880459	29881034
Chr19	34549836	34550480
Chr19	34952521	34953038
Chr19	36484187	36484778
Chr19	37000469	37001094
Chr19	37001363	37001848
Chr19	37281891	37282424
Chr19	37509185	37509700
Chr19	38130147	38130955
Chr19	40836649	40837094
Chr19	40905682	40906129
Chr19	40968769	40969274
Chr19	41337907	41338411
Chr19	41987016	41988112
Chr19	43514827	43515324
Chr19	43515399	43515842
Chr19	43749550	43750046
Chr19	44181546	44182107
Chr19	44322304	44322769
Chr19	44322580	44323150
Chr19	44358575	44359112
Chr19	44389104	44389568
Chr19	44462592	44463565
Chr19	45005606	45006152
Chr19	45550404	45551062
Chr19	45734196	45734734
Chr19	45823658	45824198
Chr19	45856462	45858156
Chr19	46119347	46119817
Chr19	46130909	46131439
Chr19	47035903	47036503
Chr19	47036259	47036929
Chr19	47124395	47125413
Chr19	47142104	47142623
Chr19	47253474	47254210
Chr19	53217137	53217725
Chr19	53674769	53675263
Chr19	53772555	53773330
Chr19	53977762	53978277
Chr19	55173098	55174171
Chr19	56896299	56896776
Chr19	60019110	60019658
Chr19	60832029	60832437
Chr19	60865902	60866355
Chr19	60866139	60866665
Chr2	3035567	3036074
Chr2	3035779	3036309
Chr2	3201364	3201875
Chr2	3391617	3392365
Chr2	3630630	3631549
Chr2	4802492	4803321
Chr2	4803132	4803744
Chr2	5871121	5872052
Chr2	9811235	9811758
Chr2	9970630	9971221
Chr2	13495764	13496296
Chr2	13977432	13977846
Chr2	13977599	13977989
Chr2	13995096	13995837
Chr2	17985424	17986208
Chr2	19579243	19579790
Chr2	22750849	22751381
Chr2	24774711	24775041
Chr2	25066339	25067078
Chr2	25127287	25128027
Chr2	25220388	25221285
Chr2	25284094	25284892
Chr2	26243861	26244900
Chr2	26358949	26359438
Chr2	26441956	26442582
Chr2	26459358	26459960
Chr2	26495243	26495872
Chr2	26788576	26789030
Chr2	27330132	27331061
Chr2	27370601	27371127
Chr2	27395292	27395824
Chr2	28496748	28497669
Chr2	29475198	29475707
Chr2	29745244	29745727
Chr2	29745508	29746019
Chr2	29820820	29821512
Chr2	29933113	29933623
Chr2	30213976	30214967
Chr2	30271494	30272052
Chr2	30329323	30329820
Chr2	30997114	30997653
Chr2	32306526	32307070
Chr2	32568816	32569275
Chr2	32715998	32716562
Chr2	32731606	32732179
Chr2	33226609	33227140
Chr2	33286761	33287141
Chr2	34609349	34610116
Chr2	34627228	34628003
Chr2	34680827	34681526
Chr2	35056127	35056626
Chr2	35991778	35992502
Chr2	37277871	37278650
Chr2	37307622	37308524
Chr2	37558473	37558991
Chr2	38367093	38367622
Chr2	38524474	38524967
Chr2	38781354	38782004
Chr2	38920387	38921163
Chr2	43786318	43787442
Chr2	49306931	49307444
Chr2	51929642	51930135
Chr2	55257614	55258015
Chr2	57090098	57090832
Chr2	57550832	57551453
Chr2	58419657	58420187
Chr2	59449990	59450557
Chr2	60047871	60048397
Chr2	60719002	60719427
Chr2	61885420	61885803
Chr2	63748958	63749927
Chr2	63936044	63936538
Chr2	65506623	65507154
Chr2	69043793	69044405
Chr2	69560776	69561473
Chr2	69660979	69661705
Chr2	69699596	69700128
Chr2	69722576	69723033
Chr2	69735241	69735616
Chr2	70498786	70499185
Chr2	70499522	70500593
Chr2	70662996	70663873
Chr2	71436615	71437106
Chr2	71711206	71711788
Chr2	73224841	73225406
Chr2	73613126	73613612
Chr2	75542185	75542692
Chr2	75670152	75670696
Chr2	79475408	79475881
Chr2	80420779	80421505
Chr2	84517325	84518109
Chr2	84554800	84555425
Chr2	84555491	84555946
Chr2	86205524	86206200
Chr2	90419955	90420909
Chr2	91022703	91023220
Chr2	91366806	91367728
Chr2	91803320	91803907
Chr2	92023154	92023630
Chr2	94246383	94246932
Chr2	97306441	97307156
Chr2	101519320	101519728
Chr2	102741098	102741570
Chr2	103637393	103637862
Chr2	103650119	103650878
Chr2	103867879	103868723
Chr2	104582533	104583130
Chr2	104656766	104657279
Chr2	104688546	104689255
Chr2	109563703	109564323
Chr2	110789444	110790485
Chr2	112079478	112080026
Chr2	112217249	112217954
Chr2	117075308	117075858
Chr2	118571378	118571901
Chr2	118726763	118727650
Chr2	119302760	119303452
Chr2	120434444	120435505
Chr2	120556551	120557350
Chr2	120675618	120676290
Chr2	121096754	121097287
Chr2	121239532	121240040
Chr2	121943141	121944262
Chr2	121973325	121973994
Chr2	122174249	122174951
Chr2	125074000	125074898
Chr2	125978405	125978936
Chr2	126500512	126501052
Chr2	126500948	126501596
Chr2	127073583	127074102
Chr2	127095124	127096561
Chr2	127346766	127347245
Chr2	127656891	127657760
Chr2	128036953	128037486
Chr2	128037247	128037753
Chr2	128512531	128513241
Chr2	128793016	128793653
Chr2	129023970	129024912
Chr2	129418600	129419155
Chr2	130099730	130100599
Chr2	130249629	130250422
Chr2	130275899	130276375
Chr2	130468115	130468714
Chr2	130665459	130666005
Chr2	131005403	131005944
Chr2	131088085	131088690
Chr2	131178109	131178723
Chr2	131317444	131318160
Chr2	131335873	131336345
Chr2	132078139	132078721
Chr2	132403688	132404258
Chr2	137873409	137873946
Chr2	140496330	140497226
Chr2	144095958	144096697
Chr2	144194537	144195120
Chr2	148532252	148532809
Chr2	150834726	150835227
Chr2	151931334	151931903
Chr2	151969206	151969624
Chr2	152052628	152053142
Chr2	152119473	152120473
Chr2	152656610	152657147
Chr2	153066540	153067228
Chr2	153475075	153475477
Chr2	153566726	153567374
Chr2	154233137	154233953
Chr2	154245698	154246519
Chr2	154394958	154395616
Chr2	154439149	154439890
Chr2	154471241	154471642
Chr2	154502576	154503042
Chr2	154502926	154503522
Chr2	154716782	154717279
Chr2	154959160	154959687
Chr2	155207036	155207968
Chr2	155517620	155518210
Chr2	156022368	156022874
Chr2	157029886	157030417
Chr2	157854051	157854596
Chr2	158235470	158236007
Chr2	160934129	160934891
Chr2	163820731	163821264
Chr2	164268398	164268957
Chr2	164595187	164596128
Chr2	164629969	164630541
Chr2	164658932	164659999
Chr2	164704811	164705351
Chr2	164736741	164737289
Chr2	166612257	166612730
Chr2	166630927	166631576
Chr2	166731445	166732694
Chr2	166821374	166821862
Chr2	166888463	166889640
Chr2	167174077	167174825
Chr2	167317973	167318493
Chr2	167486965	167487563
Chr2	167906146	167906653
Chr2	167906955	167907640
Chr2	167942763	167943274
Chr2	168032437	168032820
Chr2	168055985	168056523
Chr2	168566871	168567399
Chr2	168656917	168657418
Chr2	168806786	168807280
Chr2	169868192	169868708
Chr2	169956047	169956564
Chr2	170044759	170045256
Chr2	172195854	172196524
Chr2	172265900	172266452
Chr2	172765740	172766301
Chr2	172825488	172826025
Chr2	172847283	172847829
Chr2	173485233	173486409
Chr2	179711262	179711921
Chr2	179759341	179760065
Chr2	179776690	179777226
Chr2	180443940	180444479
Chr2	181022344	181022816
Chr2	181193512	181194297
Chr2	181316112	181316818
Chr2	181327060	181327575
Chr2	181336327	181336945
Chr3	8923422	8923946
Chr3	9974455	9975117
Chr3	10342694	10343699
Chr3	10439639	10440164
Chr3	14578559	14579049
Chr3	14862485	14863196
Chr3	15054098	15054546
Chr3	15060670	15061176
Chr3	15061004	15061447
Chr3	16083096	16083624
Chr3	16083704	16084763
Chr3	17693888	17694356
Chr3	19210714	19211066
Chr3	19795361	19795957
Chr3	19957668	19958201
Chr3	19958197	19958802
Chr3	21975576	21976052
Chr3	21976315	21977020
Chr3	26051961	26052555
Chr3	27052458	27053155
Chr3	30691586	30692211
Chr3	30994566	30995312
Chr3	31249234	31249806
Chr3	32607478	32608017
Chr3	32716375	32716928
Chr3	33698989	33699548
Chr3	33918499	33918874
Chr3	35831158	35831710
Chr3	36470428	36471059
Chr3	38383043	38383935
Chr3	40439478	40440307
Chr3	40886592	40887274
Chr3	41546042	41546577
Chr3	49560585	49561012
Chr3	50974300	50974895
Chr3	51029572	51030144
Chr3	51144214	51144678
Chr3	54538560	54539089
Chr3	55987250	55987720
Chr3	58329335	58329822
Chr3	58380477	58381014
Chr3	67386326	67387567
Chr3	68673175	68673707
[truncated: 1,460 more rows]

## Sheet: H3K27ac-peaks-statistics
Peak nr	chr:start-end	baseMean	log2FoldChange	lfcSE	stat	pvalue	padj	H3K27ac_2i_rep1_X21	H3K27ac_2i_rep2_X30	H3K27ac_FCS_rep1_X43	H3K27ac_FCS_rep2_X53
1	Chr1:4797146-4798714	46.2309	0.354541	0.316908	1.11875	0.263247	0.739356	33.8349	44.8255	50.5585	55.7049
2	Chr1:4847424-4848186	21.9451	-0.370171	0.382498	-0.967771	0.333159	0.779716	25.0629	26.3679	16.8528	19.4967
3	Chr1:5072658-5074079	25.0088	0.107056	0.375483	0.285117	0.775554	0.953074	27.5692	20.2154	30.8969	21.3535
4	Chr1:6203913-6205556	50.6616	0.0557166	0.308412	0.180656	0.856637	0.969202	52.6321	46.5833	44.9409	58.4901
5	Chr1:7077822-7079928	76.3776	0.515807	0.275851	1.86987	0.0615013	0.441218	55.1384	66.7987	80.5191	103.054
6	Chr1:7387260-7388859	28.7375	-0.136707	0.375393	-0.36417	0.715731	0.937117	27.5692	33.3994	15.9166	38.065
7	Chr1:9537659-9538990	30.4441	0.378973	0.353476	1.07213	0.28366	0.74877	26.3161	24.6101	34.6419	36.2082
8	Chr1:9689603-9690897	35.3486	-0.0555498	0.33914	-0.163796	0.869892	0.973233	36.3412	36.0362	37.4507	31.5661
9	Chr1:9933338-9934700	40.2371	0.268066	0.329873	0.812635	0.416428	0.81649	36.3412	35.1572	38.387	51.0628
10	Chr1:10027508-10028742	41.5245	0.0802203	0.331109	0.242277	0.808565	0.961154	42.607	37.794	33.7057	51.9912
11	Chr1:10029352-10030672	43.5993	-0.340554	0.323748	-1.05191	0.292842	0.756348	57.6447	42.1887	34.6419	39.9218
12	Chr1:11403853-11404864	13.2162	-0.607809	0.421692	-1.44136	0.149484	0.624945	17.544	17.5786	12.1715	5.57049
13	Chr1:11491439-11491819	2.99364	-0.0502941	0.390102	-0.128926	0.897416	0.979222	3.75944	2.63679	0.936268	4.64207
14	Chr1:12605799-12606985	14.3711	-0.178899	0.41409	-0.432029	0.66572	0.921987	13.7846	17.5786	14.9803	11.141
15	Chr1:13083838-13085149	23.4417	1.06397	0.386752	2.75103	0.00594088	0.145137	12.5315	12.305	27.1518	41.7787
16	Chr1:13362461-13363987	43.8882	-0.421251	0.319818	-1.31716	0.187785	0.662742	50.1258	52.7358	32.7694	39.9218
17	Chr1:13579236-13580690	50.2892	-0.137953	0.309783	-0.445321	0.656088	0.918567	48.8727	57.1305	54.3036	40.8503
18	Chr1:13649597-13651228	53.9785	-0.228476	0.29931	-0.763342	0.445259	0.825676	62.6573	55.3726	47.7497	50.1344
19	Chr1:14299308-14300646	21.7227	0.155286	0.38286	0.405596	0.68504	0.928203	20.0503	20.2154	24.343	22.282
20	Chr1:15795039-15796473	54.2345	0.273426	0.300143	0.910985	0.362303	0.790315	50.1258	46.5833	55.2398	64.989
21	Chr1:16093727-16095003	56.1014	0.00532636	0.299957	0.0177571	0.985833	0.998341	50.1258	61.5251	49.6222	63.1322
22	Chr1:16608638-16609915	22.8565	0.0707407	0.383259	0.184577	0.853561	0.96841	17.544	26.3679	19.6616	27.8524
23	Chr1:16646092-16647780	44.4703	0.0392727	0.316684	0.124012	0.901306	0.980551	42.607	44.8255	46.8134	43.6355
24	Chr1:16654858-16655951	14.871	0.252904	0.416113	0.607779	0.543334	0.87567	16.2909	9.66824	12.1715	21.3535
25	Chr1:17921258-17922462	11.8926	0.446269	0.39645	1.12566	0.260309	0.735291	11.2783	0.878931	15.9166	19.4967
26	Chr1:20809480-20811053	34.1989	0.309264	0.344754	0.897057	0.369689	0.792365	31.3286	28.1258	33.7057	43.6355
27	Chr1:21245635-21246802	28.0765	0.683551	0.368491	1.855	0.063596	0.446998	23.8098	15.8208	30.8969	41.7787
28	Chr1:23262312-23263759	42.6596	-0.287376	0.326622	-0.879842	0.378945	0.79787	38.8475	56.2516	40.2595	35.2798
29	Chr1:23389299-23390286	13.96	-0.240757	0.415416	-0.579556	0.562214	0.883115	17.544	14.0629	11.2352	12.9978
30	Chr1:23928416-23929374	13.7012	-0.405875	0.41639	-0.974747	0.329686	0.779716	17.544	15.8208	10.299	11.141
31	Chr1:24106796-24107959	18.1193	0.367973	0.398436	0.923543	0.355724	0.788372	13.7846	15.8208	19.6616	23.2104
32	Chr1:24684666-24685821	15.097	0.319368	0.411548	0.776016	0.43774	0.824325	10.0252	14.9418	16.8528	18.5683
33	Chr1:30929828-30931542	74.4123	0.164624	0.274577	0.599556	0.548802	0.878971	68.923	70.3145	69.2839	89.1278
34	Chr1:31005648-31007614	126.396	0.311013	0.231092	1.34584	0.178355	0.652727	105.264	117.777	146.994	135.549
35	Chr1:33079289-33080493	10.0989	-0.596602	0.430187	-1.38684	0.165489	0.637622	15.0378	12.305	6.55388	6.4989
36	Chr1:33692701-33693828	15.2429	-0.698169	0.412172	-1.69388	0.090288	0.520428	23.8098	17.5786	10.299	9.28415
37	Chr1:33776152-33777412	20.4835	0.143807	0.388291	0.370359	0.711115	0.93567	18.7972	19.3365	19.6616	24.1388
38	Chr1:33870682-33871850	21.1189	0.201407	0.389305	0.517351	0.604911	0.903085	15.0378	22.8522	19.6616	26.924
39	Chr1:33963983-33965423	28.4906	-0.430347	0.369194	-1.16564	0.24376	0.717316	40.1007	28.1258	29.0243	16.7115
40	Chr1:34495753-34497131	35.8927	0.176818	0.345815	0.511309	0.609135	0.904716	30.0755	36.0362	47.7497	29.7093
41	Chr1:34899090-34900461	41.7863	0.400844	0.327006	1.2258	0.220274	0.698597	28.8224	40.4308	48.686	49.206
42	Chr1:35926058-35927382	32.0458	-0.573861	0.356878	-1.608	0.107835	0.560158	31.3286	48.3412	28.088	20.4251
43	Chr1:36070304-36071472	29.4062	0.856312	0.366246	2.33808	0.0193831	0.276209	22.5566	14.9418	33.7057	46.4207
44	Chr1:36116877-36117625	22.6796	0.997904	0.391114	2.55144	0.0107279	0.202904	17.544	7.91038	32.7694	32.4945
45	Chr1:36364068-36365303	16.4828	0.325445	0.406066	0.801458	0.422867	0.816679	16.2909	11.4261	17.7891	20.4251
46	Chr1:36425282-36426492	22.3358	0.269102	0.381126	0.706071	0.480144	0.845347	18.7972	20.2154	23.4067	26.924
47	Chr1:36501427-36502629	18.1207	0.312022	0.401601	0.776945	0.437191	0.824278	13.7846	16.6997	26.2155	15.7831
48	Chr1:36567902-36569635	43.4857	-0.00653168	0.324195	-0.0201474	0.983926	0.99747	45.1133	42.1887	35.5782	51.0628
49	Chr1:36887721-36889104	40.9783	0.389304	0.327916	1.18721	0.235146	0.708703	36.3412	32.5204	42.1321	52.9196
50	Chr1:36996000-36997268	43.0269	0.29393	0.33405	0.879896	0.378915	0.79787	48.8727	27.2469	43.0683	52.9196
51	Chr1:37041928-37043095	27.3587	1.0246	0.371434	2.75849	0.00580694	0.142974	18.7972	12.305	41.1958	37.1366
52	Chr1:37157079-37158233	16.25	0.817732	0.408439	2.00209	0.045275	0.386439	8.77202	10.5472	22.4704	23.2104
53	Chr1:37486532-37487770	27.6096	0.00356028	0.364462	0.00976859	0.992206	0.998448	32.5818	22.8522	27.1518	27.8524
54	Chr1:37597530-37598356	17.1108	0.0703129	0.402657	0.174623	0.861376	0.969524	16.2909	16.6997	20.5979	14.8546
55	Chr1:37920982-37922587	29.5357	-0.221402	0.357669	-0.619015	0.535907	0.873387	35.0881	29.8836	29.9606	23.2104
56	Chr1:38053327-38054600	23.2671	0.559098	0.382039	1.46346	0.143342	0.611114	15.0378	19.3365	24.343	34.3513
57	Chr1:38186070-38187421	37.0041	0.519781	0.337383	1.54063	0.123408	0.584568	25.0629	32.5204	44.9409	45.4923
58	Chr1:39424254-39425455	29.1262	0.121807	0.358241	0.340014	0.733846	0.944525	25.0629	29.8836	33.7057	27.8524
59	Chr1:39534882-39536077	19.2682	-0.0118253	0.395651	-0.0298882	0.976156	0.995522	21.3035	17.5786	14.9803	23.2104
60	Chr1:39592127-39593391	17.7211	-0.168912	0.400083	-0.422192	0.672885	0.925884	16.2909	21.9733	14.9803	17.6399
61	Chr1:39633287-39634891	45.0613	0.136136	0.316014	0.430792	0.66662	0.92228	43.8601	41.3097	44.9409	50.1344
62	Chr1:39949495-39950770	18.7665	-1.15365	0.40467	-2.85083	0.00436046	0.121166	21.3035	36.0362	10.299	7.42732
63	Chr1:39956843-39958060	21.2822	0.432406	0.386062	1.12004	0.262695	0.738815	16.2909	17.5786	23.4067	27.8524
64	Chr1:40142015-40143268	21.2199	0.123112	0.38579	0.319116	0.749638	0.946097	22.5566	17.5786	21.5342	23.2104
65	Chr1:42752082-42753115	7.66497	-0.570856	0.434162	-1.31484	0.188562	0.663378	12.5315	8.78931	6.55388	2.78524
66	Chr1:42907627-42908850	23.0925	0.0918541	0.381074	0.24104	0.809524	0.961154	17.544	26.3679	21.5342	26.924
67	Chr1:43148675-43149817	16.0918	-0.41721	0.415505	-1.0041	0.315328	0.768882	16.2909	22.8522	18.7254	6.4989
68	Chr1:43154804-43156313	30.5611	0.207895	0.364587	0.570221	0.568528	0.885346	37.5944	18.4575	32.7694	33.4229
69	Chr1:43502025-43503498	28.8292	-0.505003	0.365961	-1.37994	0.167606	0.63924	36.3412	34.2783	15.9166	28.7809
70	Chr1:43883915-43885105	15.7099	-0.192524	0.411282	-0.468108	0.639707	0.914766	22.5566	12.305	14.9803	12.9978
71	Chr1:43990021-43991561	44.5526	0.24577	0.33314	0.73774	0.460673	0.832512	30.0755	49.2201	59.9212	38.9934
72	Chr1:44158522-44159732	16.9821	-0.200344	0.407555	-0.491576	0.623019	0.909195	12.5315	24.6101	17.7891	12.9978
73	Chr1:44204358-44205624	14.6239	0.867842	0.418102	2.07567	0.0379242	0.365384	11.2783	5.27358	19.6616	22.282
74	Chr1:45851523-45853115	35.7292	0.118024	0.352778	0.334556	0.73796	0.944525	28.8224	38.6729	26.2155	49.206
75	Chr1:45916746-45917632	10.0033	-0.400058	0.431564	-0.926996	0.353929	0.787532	16.2909	8.78931	9.36268	5.57049
76	Chr1:46705896-46707090	8.03778	0.982435	0.4342	2.26263	0.0236582	0.302433	2.50629	3.51572	15.9166	10.2126
77	Chr1:46909102-46910855	50.9238	0.307354	0.320828	0.958003	0.338061	0.780984	30.0755	58.0094	58.0486	57.5617
78	Chr1:48937726-48939072	12.7276	0.19438	0.422313	0.460275	0.645319	0.915388	15.0378	7.91038	13.1078	14.8546
79	Chr1:50693830-50695194	27.6531	0.804043	0.365946	2.19716	0.0280088	0.320622	17.544	18.4575	40.2595	34.3513
80	Chr1:50983708-50984959	21.9627	0.0740394	0.383696	0.192964	0.846987	0.967295	17.544	24.6101	24.343	21.3535
81	Chr1:51534445-51536375	86.7764	0.102033	0.260622	0.391497	0.69543	0.930928	73.9356	92.2877	91.7543	89.1278
82	Chr1:52170070-52171346	18.7767	-0.214197	0.396057	-0.540825	0.588628	0.894789	21.3035	20.2154	19.6616	13.9262
83	Chr1:52175613-52176892	26.3852	-0.291245	0.368469	-0.79042	0.429283	0.820565	32.5818	27.2469	26.2155	19.4967
84	Chr1:52289198-52290812	57.8328	0.0984358	0.294073	0.334733	0.737826	0.944525	53.8853	57.1305	65.5388	54.7765
85	Chr1:52687040-52688418	24.1	0.743471	0.379289	1.96017	0.0499759	0.398753	16.2909	15.8208	27.1518	37.1366
86	Chr1:53008968-53010938	100.651	1.35204	0.267103	5.06187	4.15e-07	0.000127961	52.6321	51.8569	121.715	176.399
87	Chr1:53353104-53354737	42.1235	-0.0146208	0.32389	-0.0451412	0.963995	0.994678	38.8475	45.7044	45.8771	38.065
88	Chr1:53369845-53371213	20.5706	0.0905674	0.387314	0.233835	0.815113	0.962664	20.0503	19.3365	22.4704	20.4251
89	Chr1:53408783-53410151	17.5398	-0.0365365	0.402838	-0.0906978	0.927733	0.987288	16.2909	19.3365	21.5342	12.9978
90	Chr1:54306896-54308537	18.5666	0.426282	0.399635	1.06668	0.286118	0.75096	16.2909	13.184	27.1518	17.6399
91	Chr1:54495112-54496317	17.4064	0.034005	0.405009	0.083961	0.933087	0.988436	17.544	16.6997	12.1715	23.2104
92	Chr1:54641634-54642969	17.7866	1.28819	0.416236	3.09485	0.00196913	0.0778526	3.75944	9.66824	18.7254	38.9934
93	Chr1:55083298-55084769	46.3963	0.179051	0.313783	0.57062	0.568257	0.885142	40.1007	45.7044	52.431	47.3492
94	Chr1:55108825-55110114	31.0946	-0.26516	0.350545	-0.756424	0.449395	0.827573	35.0881	34.2783	28.088	26.924
95	Chr1:55143770-55145212	83.8182	0.0484072	0.275647	0.175613	0.860598	0.969265	68.923	94.9245	71.1564	100.269
96	Chr1:55187600-55188895	29.3583	-0.0196614	0.366625	-0.0536281	0.957231	0.994052	20.0503	38.6729	26.2155	32.4945
97	Chr1:55293179-55294414	16.9015	0.153704	0.402786	0.381602	0.702756	0.934461	16.2909	14.9418	19.6616	16.7115
98	Chr1:57029203-57030651	27.9952	-0.857081	0.367653	-2.33122	0.0197417	0.277794	32.5818	43.9465	20.5979	14.8546
99	Chr1:57433988-57435021	28.5081	-0.150775	0.363902	-0.414329	0.678633	0.926461	30.0755	30.7626	32.7694	20.4251
100	Chr1:57462603-57464501	42.3699	0.653857	0.330566	1.97799	0.0479295	0.392588	35.0881	27.2469	44.9409	62.2038
101	Chr1:58045721-58046954	18.1058	-0.80016	0.399964	-2.00058	0.045438	0.38675	26.3161	23.7311	11.2352	11.141
102	Chr1:58052109-58053600	43.4037	0.015244	0.323165	0.0471709	0.962377	0.994678	37.5944	48.3412	48.686	38.9934
103	Chr1:58449530-58450974	33.4495	0.187626	0.347889	0.539327	0.589661	0.894977	25.0629	36.0362	33.7057	38.9934
104	Chr1:58479972-58481424	52.5612	0.223399	0.301524	0.740899	0.458755	0.831857	46.3664	49.2201	55.2398	59.4185
105	Chr1:58502019-58503185	17.5433	0.400289	0.40064	0.999125	0.317734	0.769777	15.0378	13.184	20.5979	21.3535
106	Chr1:58561026-58562276	34.3701	0.318534	0.344838	0.923722	0.355631	0.788372	27.5692	31.6415	33.7057	44.5639
107	Chr1:58577009-58577199	0	NA	NA	NA	NA	NA	0	0	0	0
108	Chr1:58642676-58643908	27.7771	0.164878	0.361176	0.456503	0.648028	0.915894	25.0629	26.3679	30.8969	28.7809
109	Chr1:59176208-59177418	20.1073	0.491822	0.400459	1.22815	0.219392	0.696825	21.3035	9.66824	29.9606	19.4967
110	Chr1:59293299-59294658	34.1248	-0.334469	0.34468	-0.970374	0.33186	0.779716	33.8349	43.9465	27.1518	31.5661
111	Chr1:59434043-59434326	4.4486	-0.0601818	0.421272	-0.142857	0.886403	0.977668	5.01258	4.39465	3.74507	4.64207
112	Chr1:59726640-59728396	60.7823	0.221338	0.308033	0.718553	0.472416	0.839335	41.3538	68.5566	54.3036	78.9153
113	Chr1:59741095-59742738	74.8431	0.285885	0.284094	1.0063	0.314269	0.768882	57.6447	74.7091	99.2444	67.7743
114	Chr1:59753815-59755095	36.6885	0.496297	0.336821	1.47347	0.140624	0.606988	30.0755	28.1258	42.1321	46.4207
115	Chr1:59819398-59820828	34.8454	0.102065	0.34715	0.294007	0.768752	0.951348	35.0881	31.6415	28.088	44.5639
116	Chr1:59969094-59970526	42.2366	-0.140086	0.324263	-0.432013	0.665732	0.921987	50.1258	39.5519	42.1321	37.1366
117	Chr1:60099432-60100617	14.1491	-0.253944	0.416118	-0.610268	0.541684	0.87567	20.0503	12.305	12.1715	12.0694
118	Chr1:60154684-60155896	26.0957	-0.0839696	0.368776	-0.227698	0.819881	0.962786	25.0629	29.0047	21.5342	28.7809
119	Chr1:60236860-60238393	53.4168	-0.15185	0.306062	-0.496141	0.619795	0.906812	66.4167	47.4623	53.3673	46.4207
120	Chr1:60399638-60400859	36.4723	-0.0186289	0.340128	-0.0547701	0.956322	0.99392	30.0755	43.0676	39.3233	33.4229
121	Chr1:60465549-60467074	32.8502	0.48571	0.347938	1.39597	0.162724	0.63607	27.5692	24.6101	36.5145	42.7071
122	Chr1:60622903-60624644	46.2582	-0.20345	0.314273	-0.647366	0.517395	0.863606	50.1258	50.099	38.387	46.4207
123	Chr1:60907535-60908731	36.3088	0.0567156	0.350492	0.161817	0.87145	0.973233	33.8349	36.9151	25.2792	49.206
124	Chr1:63159627-63161426	76.0177	0.274989	0.283454	0.970135	0.331979	0.779716	65.1636	70.3145	65.5388	103.054
125	Chr1:63222901-63224422	76.7634	0.218959	0.272021	0.804935	0.420857	0.81649	66.4167	73.8302	73.9652	92.8415
126	Chr1:63246088-63247283	24.8959	0.178207	0.37362	0.476976	0.633379	0.911928	20.0503	25.489	23.4067	30.6377
127	Chr1:63293397-63294621	23.4366	-0.266981	0.380218	-0.702179	0.482567	0.846055	26.3161	26.3679	25.2792	15.7831
128	Chr1:63487509-63489167	58.2471	0.728373	0.297906	2.44498	0.0144861	0.240343	36.3412	46.5833	70.2201	79.8437
129	Chr1:63492071-63493322	35.0852	0.494819	0.346346	1.42868	0.153095	0.628207	30.0755	25.489	34.6419	50.1344
130	Chr1:63776748-63777977	18.3385	0.398405	0.403807	0.986623	0.323828	0.773728	16.2909	13.184	29.0243	14.8546
131	Chr1:64167766-64169386	98.6285	0.0724644	0.253002	0.286418	0.774558	0.953074	105.264	87.0141	91.7543	110.481
132	Chr1:64351911-64352607	13.936	0.857365	0.421795	2.03266	0.0420869	0.379466	11.2783	4.39465	17.7891	22.282
133	Chr1:64578346-64580257	52.2593	0.000232036	0.316536	0.000733047	0.999415	0.999656	56.3916	48.3412	38.387	65.9175
134	Chr1:64662990-64664475	25.1818	0.623776	0.372817	1.67314	0.094299	0.52937	18.7972	17.5786	34.6419	29.7093
135	Chr1:64736786-64738139	30.0736	-0.240583	0.357576	-0.672817	0.501064	0.853487	27.5692	38.6729	24.343	29.7093
136	Chr1:65002591-65003779	13.2339	-0.0125781	0.419143	-0.0300091	0.97606	0.995522	16.2909	10.5472	12.1715	13.9262
137	Chr1:65155977-65157302	23.7609	-0.208605	0.376454	-0.554132	0.579488	0.889596	27.5692	24.6101	18.7254	24.1388
138	Chr1:65224649-65226128	32.249	-0.643368	0.352183	-1.8268	0.06773	0.462104	46.3664	36.0362	20.5979	25.9956
139	Chr1:65232582-65234015	31.9565	0.0119124	0.348706	0.0341616	0.972748	0.995522	30.0755	33.3994	34.6419	29.7093
140	Chr1:66746881-66748212	28.3127	0.156504	0.361227	0.433256	0.664829	0.921964	26.3161	26.3679	26.2155	34.3513
141	Chr1:66863228-66864665	32.7813	-0.372115	0.346947	-1.07254	0.283476	0.74877	40.1007	36.0362	25.2792	29.7093
142	Chr1:69873043-69874238	7.46339	0.454037	0.434216	1.04565	0.295723	0.759223	5.01258	5.27358	8.42641	11.141
143	Chr1:71148611-71150021	44.6278	0.0484368	0.320418	0.151168	0.879843	0.975494	38.8475	48.3412	40.2595	51.0628
144	Chr1:71603149-71604582	32.9268	0.746186	0.349876	2.13272	0.032948	0.342742	21.3035	23.7311	39.3233	47.3492
145	Chr1:71699009-71700415	50.694	0.116989	0.305114	0.383429	0.701402	0.933732	46.3664	50.099	56.1761	50.1344
146	Chr1:72258064-72259415	31.8938	0.0613957	0.35068	0.175076	0.86102	0.969477	35.0881	27.2469	29.9606	35.2798
147	Chr1:72272418-72274021	36.0997	0.0143691	0.340096	0.0422502	0.966299	0.994678	33.8349	37.794	42.1321	30.6377
148	Chr1:72275455-72276602	16.9226	0.479611	0.404083	1.18691	0.235263	0.708703	12.5315	13.184	23.4067	18.5683
149	Chr1:72282572-72283799	17.0973	0.406873	0.403806	1.0076	0.313649	0.768882	15.0378	12.305	23.4067	17.6399
150	Chr1:72290026-72291297	39.5138	0.191268	0.331938	0.576215	0.56447	0.88349	30.0755	42.1887	44.9409	40.8503
151	Chr1:72301177-72303135	51.0869	-0.740547	0.320422	-2.31116	0.0208238	0.279509	63.9104	68.5566	46.8134	25.0672
152	Chr1:72353215-72354833	43.809	0.508351	0.327207	1.55361	0.120279	0.578959	42.607	27.2469	56.1761	49.206
153	Chr1:72851697-72853265	51.1029	0.689019	0.308204	2.23559	0.0253784	0.308156	32.5818	41.3097	64.6025	65.9175
154	Chr1:72870679-72871851	22.3588	-0.178563	0.380236	-0.469611	0.638633	0.914012	23.8098	24.6101	19.6616	21.3535
155	Chr1:74282596-74283617	18.98	0.318618	0.394386	0.807884	0.419158	0.81649	16.2909	15.8208	20.5979	23.2104
156	Chr1:74443597-74444857	21.4533	0.555936	0.385554	1.44192	0.149326	0.624945	15.0378	16.6997	27.1518	26.924
157	Chr1:74552109-74553958	80.5213	0.50705	0.273299	1.8553	0.063554	0.446998	58.8979	70.3145	82.3916	110.481
158	Chr1:74707860-74709086	18.9871	0.035692	0.402975	0.0885712	0.929423	0.988076	26.3161	11.4261	16.8528	21.3535
159	Chr1:74862875-74864326	27.7078	-0.421984	0.365693	-1.15393	0.24853	0.722917	38.8475	27.2469	20.5979	24.1388
160	Chr1:75120799-75122299	32.1376	0.486579	0.35195	1.38253	0.16681	0.638957	30.0755	21.0943	38.387	38.9934
161	Chr1:75138646-75140131	34.2646	0.176935	0.34677	0.510237	0.609885	0.904716	32.5818	30.7626	44.0046	29.7093
162	Chr1:75164781-75165980	20.2485	-0.113678	0.388581	-0.292547	0.769868	0.951559	22.5566	20.2154	18.7254	19.4967
163	Chr1:75206822-75208128	36.7779	-0.395964	0.338669	-1.16918	0.242332	0.715328	36.3412	49.2201	32.7694	28.7809
164	Chr1:75215134-75216479	43.7725	-0.147555	0.330575	-0.446358	0.655339	0.918537	46.3664	46.5833	52.431	29.7093
165	Chr1:75475315-75476643	20.6774	0.474046	0.391306	1.21145	0.225725	0.702511	20.0503	12.305	26.2155	24.1388
166	Chr1:75517607-75518802	18.592	0.587645	0.399595	1.4706	0.141399	0.608455	16.2909	10.5472	21.5342	25.9956
167	Chr1:78484975-78486190	32.1742	0.318271	0.352599	0.902643	0.366715	0.792092	22.5566	32.5204	32.7694	40.8503
168	Chr1:78653949-78655237	30.5327	-0.266795	0.362429	-0.736131	0.461651	0.833154	27.5692	40.4308	33.7057	20.4251
169	Chr1:79757556-79758948	17.2156	0.509026	0.405282	1.25598	0.209124	0.68517	16.2909	9.66824	23.4067	19.4967
170	Chr1:80336469-80338428	60.5865	0.0335181	0.289349	0.11584	0.90778	0.981647	55.1384	64.1619	58.9849	64.0606
171	Chr1:82312703-82313993	23.8526	0.565977	0.380994	1.48553	0.137404	0.601514	22.5566	13.184	29.9606	29.7093
172	Chr1:82720850-82722257	29.7084	0.00339857	0.358768	0.0094729	0.992442	0.998448	27.5692	31.6415	24.343	35.2798
173	Chr1:82816302-82817515	20.6823	0.720213	0.391151	1.84127	0.0655825	0.452928	16.2909	11.4261	28.088	26.924
174	Chr1:82835568-82836839	22.9415	0.660812	0.380847	1.73511	0.0827213	0.504475	16.2909	15.8208	28.088	31.5661
175	Chr1:84280511-84281889	18.7662	0.228602	0.396197	0.576992	0.563945	0.883334	13.7846	19.3365	19.6616	22.282
176	Chr1:84835594-84836605	33.0142	0.201008	0.351458	0.571927	0.567371	0.884657	31.3286	29.0047	28.088	43.6355
177	Chr1:84857169-84858505	37.2956	1.02583	0.346662	2.95916	0.0030848	0.101872	26.3161	17.5786	44.9409	60.347
178	Chr1:84930916-84932305	15.3615	-0.473019	0.409539	-1.15501	0.248088	0.722599	18.7972	19.3365	12.1715	11.141
179	Chr1:87689776-87690780	17.4341	-0.119349	0.40204	-0.296858	0.766575	0.951201	21.3035	15.8208	14.044	18.5683
180	Chr1:87960742-87961994	31.4794	0.551372	0.357958	1.54033	0.123481	0.584568	21.3035	26.3679	30.8969	47.3492
181	Chr1:88207544-88208740	23.034	0.879464	0.384272	2.28865	0.0220998	0.289629	13.7846	14.0629	27.1518	37.1366
182	Chr1:88238845-88240447	99.1632	-0.324892	0.271412	-1.19704	0.23129	0.704755	105.264	117.777	110.48	63.1322
183	Chr1:88254833-88256997	131.947	0.281382	0.229859	1.22415	0.220896	0.699503	116.543	119.535	132.95	158.759
184	Chr1:88338029-88339942	65.7652	0.940933	0.297284	3.1651	0.0015503	0.0665031	31.3286	51.8569	82.3916	97.4836
185	Chr1:88363536-88364768	28.6324	-0.245199	0.361824	-0.677674	0.497979	0.852033	26.3161	36.9151	28.088	23.2104
186	Chr1:88368119-88369948	63.5479	0.947018	0.29885	3.16887	0.00153032	0.0663297	50.1258	31.6415	79.5828	92.8415
187	Chr1:88383238-88385071	69.9674	0.679325	0.28204	2.40862	0.0160131	0.251911	43.8601	58.8884	86.1367	90.9847
188	Chr1:88385111-88385917	30.5263	0.0866044	0.352113	0.245956	0.805716	0.960298	28.8224	29.8836	31.8331	31.5661
189	Chr1:88399150-88400552	39.8738	0.964389	0.33373	2.88972	0.00385579	0.113385	21.3035	27.2469	55.2398	55.7049
190	Chr1:88421812-88423438	118.683	0.423714	0.23414	1.80966	0.0703481	0.4691	97.7454	101.956	136.695	138.334
191	Chr1:88424202-88425397	74.3411	-0.0453925	0.272799	-0.166395	0.867846	0.97249	70.1762	80.8616	67.4113	78.9153
192	Chr1:88427108-88428839	96.8895	-0.574523	0.274648	-2.09185	0.0364517	0.35942	111.53	124.808	97.3719	53.8481
193	Chr1:88566477-88567660	13.7979	0.284509	0.419509	0.678193	0.497649	0.852033	13.7846	9.66824	20.5979	11.141
194	Chr1:88599775-88601177	26.2218	0.0788011	0.368328	0.213943	0.830592	0.964043	28.8224	21.9733	29.0243	25.0672
195	Chr1:89110028-89111397	46.6465	0.339219	0.323113	1.04985	0.293789	0.756698	42.607	37.794	41.1958	64.989
196	Chr1:89222905-89224358	39.165	0.143745	0.332336	0.43253	0.665356	0.921987	37.5944	36.0362	47.7497	35.2798
197	Chr1:89570419-89571575	18.7075	-0.190388	0.399432	-0.476645	0.633615	0.911958	26.3161	14.9418	17.7891	15.7831
198	Chr1:89652112-89653512	34.8146	-0.173579	0.343344	-0.505553	0.61317	0.904716	38.8475	36.0362	37.4507	26.924
199	Chr1:89749333-89750600	20.4914	-0.0652346	0.396752	-0.164421	0.869399	0.973233	13.7846	28.1258	15.9166	24.1388
200	Chr1:90101638-90103003	18.8176	0.557825	0.397402	1.40368	0.160414	0.633971	16.2909	11.4261	24.343	23.2104
201	Chr1:90173277-90174554	30.4093	-0.173426	0.355912	-0.487272	0.626066	0.911314	37.5944	28.1258	25.2792	30.6377
202	Chr1:90966448-90967877	24.2405	-0.423226	0.375138	-1.12819	0.25924	0.735291	28.8224	29.0047	16.8528	22.282
203	Chr1:91350491-91352134	28.6889	0.217237	0.366627	0.592527	0.553498	0.880023	33.8349	18.4575	30.8969	31.5661
204	Chr1:91772990-91774194	17.9702	1.09191	0.40824	2.67468	0.00748014	0.169628	12.5315	5.27358	27.1518	26.924
205	Chr1:91827402-91828469	15.1303	-0.0784542	0.4106	-0.191072	0.848469	0.967407	17.544	14.0629	15.9166	12.9978
206	Chr1:92099950-92101211	18.9928	0.0694387	0.402612	0.17247	0.863068	0.97014	20.0503	16.6997	27.1518	12.0694
207	Chr1:92415116-92416287	9.8131	0.966197	0.433148	2.23064	0.0257052	0.310425	5.01258	3.51572	10.299	20.4251
208	Chr1:92499276-92500768	18.6963	0.717861	0.398431	1.80172	0.0715893	0.471704	11.2783	13.184	22.4704	27.8524
209	Chr1:93146355-93147561	21.8899	0.274227	0.382696	0.716566	0.473642	0.840238	18.7972	19.3365	26.2155	23.2104
210	Chr1:93294651-93295886	25.1468	0.466895	0.376492	1.24012	0.214932	0.691995	25.0629	14.9418	28.088	32.4945
211	Chr1:93309135-93310482	27.143	0.454698	0.365844	1.24288	0.213914	0.691872	21.3035	21.9733	36.5145	28.7809
212	Chr1:94076089-94078274	82.2313	0.278359	0.262752	1.0594	0.289418	0.752904	77.695	69.4355	89.8818	91.9131
213	Chr1:94369592-94370992	30.3191	-0.282966	0.353775	-0.799846	0.4238	0.816679	33.8349	34.2783	29.0243	24.1388
214	Chr1:94727290-94728678	18.8279	1.15553	0.404311	2.85803	0.00426279	0.120612	8.77202	8.78931	22.4704	35.2798
215	Chr1:94803132-94804485	25.7397	0.0650687	0.36872	0.176472	0.859923	0.969202	22.5566	27.2469	28.088	25.0672
216	Chr1:94815164-94817041	56.9989	0.110152	0.295636	0.372594	0.709451	0.935303	48.8727	59.7673	61.7937	57.5617
217	Chr1:94830470-94831789	28.1632	0.481345	0.371572	1.29543	0.195173	0.672039	28.8224	15.8208	28.088	39.9218
218	Chr1:95131730-95133084	25.4809	-0.034467	0.370367	-0.0930617	0.925855	0.986887	22.5566	29.0047	27.1518	23.2104
219	Chr1:95201665-95202888	17.8387	0.384856	0.402803	0.955444	0.339353	0.781649	10.0252	18.4575	19.6616	23.2104
220	Chr1:95239737-95240975	17.9749	0.335217	0.400586	0.836817	0.402695	0.809411	15.0378	14.9418	16.8528	25.0672
221	Chr1:95374515-95376350	69.3607	0.130025	0.281283	0.462257	0.643897	0.915388	56.3916	74.7091	69.2839	77.0584
222	Chr1:95407785-95409013	21.5983	0.0974173	0.39678	0.24552	0.806054	0.960298	12.5315	28.1258	29.0243	16.7115
223	Chr1:95531453-95532576	14.8187	-0.277	0.412885	-0.67089	0.502291	0.854096	20.0503	14.0629	11.2352	13.9262
224	Chr1:95650663-95651874	22.4722	-0.411733	0.383668	-1.07315	0.283204	0.74877	26.3161	27.2469	14.044	22.282
225	Chr1:95697758-95698904	28.4412	0.285502	0.360811	0.791278	0.428782	0.820493	21.3035	28.1258	32.7694	31.5661
226	Chr1:95700009-95701347	54.8012	0.18569	0.298669	0.621725	0.534123	0.873387	55.1384	46.5833	59.9212	57.5617
227	Chr1:95721304-95722552	22.3254	0.327134	0.382693	0.854821	0.39265	0.80442	21.3035	16.6997	28.088	23.2104
228	Chr1:99666022-99667517	22.9864	0.689669	0.38173	1.80669	0.0708101	0.469968	13.7846	17.5786	28.088	32.4945
229	Chr1:107559831-107561166	26.4941	-0.152261	0.365386	-0.416712	0.676889	0.925923	27.5692	29.0047	23.4067	25.9956
230	Chr1:107886321-107887696	35.0278	-0.364918	0.346025	-1.0546	0.291608	0.754258	48.8727	32.5204	27.1518	31.5661
231	Chr1:108692326-108693714	25.1678	-0.036428	0.37392	-0.0974218	0.922391	0.986184	27.5692	23.7311	19.6616	29.7093
232	Chr1:120207008-120208500	30.7022	0.785118	0.355786	2.20671	0.0273343	0.319344	18.7972	21.9733	40.2595	41.7787
233	Chr1:120217879-120219074	18.4369	0.403775	0.403045	1.00181	0.316435	0.769139	8.77202	20.2154	23.4067	21.3535
234	Chr1:120284786-120286643	64.5927	-0.0492403	0.282292	-0.174431	0.861527	0.969524	63.9104	67.6777	61.7937	64.989
235	Chr1:120355133-120356577	65.6111	0.0960118	0.280829	0.341887	0.732436	0.943989	63.9104	62.4041	69.2839	66.8459
236	Chr1:120523845-120525226	67.2187	0.0928477	0.285933	0.324719	0.745394	0.945539	55.1384	73.8302	76.774	63.1322
237	Chr1:120581818-120582766	13.9487	-0.775648	0.416788	-1.86101	0.0627424	0.445655	18.7972	20.2154	8.42641	8.35573
238	Chr1:120944052-120945219	18.0675	0.0734624	0.398987	0.184122	0.853918	0.96841	20.0503	14.9418	16.8528	20.4251
239	Chr1:120961252-120962453	9.79368	0.500892	0.433035	1.1567	0.247395	0.722066	2.50629	10.5472	14.9803	11.141
240	Chr1:121063883-121064673	9.71306	0.905029	0.432314	2.09345	0.0363087	0.358477	3.75944	5.27358	13.1078	16.7115
241	Chr1:121244828-121246045	13.9928	0.74987	0.418038	1.79379	0.0728472	0.475346	6.26573	10.5472	19.6616	19.4967
242	Chr1:121400784-121402016	16.7545	0.0643603	0.406081	0.158491	0.87407	0.973683	17.544	14.9418	21.5342	12.9978
243	Chr1:121422280-121423566	23.6983	0.0486585	0.376305	0.129306	0.897116	0.979222	22.5566	23.7311	27.1518	21.3535
244	Chr1:121544796-121546051	15.6254	0.915018	0.412787	2.21668	0.0266447	0.315865	6.26573	10.5472	23.4067	22.282
245	Chr1:121733583-121734557	18.2381	0.0410333	0.3992	0.102789	0.91813	0.985447	16.2909	19.3365	22.4704	14.8546
246	Chr1:122017209-122018449	21.6101	0.740721	0.389439	1.90202	0.0571684	0.427765	16.2909	12.305	33.7057	24.1388
247	Chr1:127331323-127332820	38.8774	0.361546	0.330814	1.0929	0.274437	0.743591	32.5818	33.3994	47.7497	41.7787
248	Chr1:127430108-127431163	11.0196	0.76317	0.42949	1.77692	0.075581	0.483092	6.26573	6.15251	11.2352	20.4251
249	Chr1:127456322-127457527	16.7905	0.506434	0.404425	1.25223	0.210486	0.687392	13.7846	11.4261	20.5979	21.3535
250	Chr1:129101168-129102355	16.4245	-0.173595	0.405105	-0.428518	0.668274	0.92305	20.0503	15.8208	14.044	15.7831
251	Chr1:129403285-129404430	12.0265	-0.395853	0.423917	-0.933797	0.350409	0.786381	16.2909	13.184	7.49015	11.141
252	Chr1:129670237-129671656	43.4762	0.52356	0.326653	1.6028	0.108978	0.560864	26.3161	41.3097	52.431	53.8481
253	Chr1:129999413-130000117	22.0677	-0.105491	0.383049	-0.275399	0.78301	0.954435	22.5566	23.7311	24.343	17.6399
254	Chr1:130140277-130141670	41.8271	0.0551081	0.323113	0.170554	0.864575	0.970896	37.5944	43.9465	42.1321	43.6355
255	Chr1:130255305-130256739	43.5509	0.0979117	0.319842	0.306126	0.759509	0.948649	45.1133	38.6729	43.0683	47.3492
256	Chr1:130312949-130314598	62.1454	0.0466687	0.286466	0.162912	0.870588	0.973233	57.6447	64.1619	60.8574	65.9175
257	Chr1:132358651-132359836	14.8395	-0.153896	0.416248	-0.369722	0.711589	0.93567	20.0503	12.305	9.36268	17.6399
258	Chr1:132613412-132614814	32.7536	0.267763	0.353272	0.757951	0.448481	0.826883	21.3035	36.0362	39.3233	34.3513
259	Chr1:133034127-133036734	100.42	0.563254	0.258029	2.18291	0.0290422	0.324415	71.4293	86.1352	103.926	140.191
260	Chr1:133049320-133050609	22.3021	0.609049	0.386372	1.57633	0.11495	0.570464	20.0503	12.305	26.2155	30.6377
261	Chr1:133141294-133142489	13.3252	0.631454	0.423924	1.48955	0.136344	0.600038	3.75944	13.184	17.7891	18.5683
262	Chr1:133423723-133425324	50.5929	-0.427591	0.30816	-1.38756	0.16527	0.637622	55.1384	63.283	46.8134	37.1366
263	Chr1:133693506-133694701	12.638	0.205259	0.421609	0.486847	0.626367	0.91135	13.7846	8.78931	14.9803	12.9978
264	Chr1:133723707-133724942	23.5424	0.0900816	0.381206	0.236307	0.813195	0.962664	17.544	27.2469	20.5979	28.7809
265	Chr1:133806567-133808518	110.201	0.324752	0.242628	1.33848	0.180741	0.653553	86.4671	106.351	122.651	125.336
266	Chr1:133903386-133905064	57.9036	0.239563	0.294135	0.814468	0.415377	0.81649	53.8853	50.978	58.0486	68.7027
267	Chr1:134161253-134162676	36.031	-0.821396	0.340794	-2.41024	0.0159419	0.25139	52.6321	43.9465	23.4067	24.1388
268	Chr1:134212231-134213385	11.8913	-0.658468	0.427804	-1.53918	0.12376	0.584762	15.0378	17.5786	11.2352	3.71366
269	Chr1:134287801-134288937	14.7818	0.359184	0.413993	0.867609	0.385608	0.801016	8.77202	14.9418	15.9166	19.4967
270	Chr1:134366654-134368044	36.1386	-0.449251	0.337721	-1.33024	0.183438	0.656748	40.1007	45.7044	30.8969	27.8524
271	Chr1:134915709-134917266	72.3781	0.697345	0.286807	2.43141	0.01504	0.244459	42.607	62.4041	80.5191	103.982
272	Chr1:134921128-134922326	27.1267	0.324486	0.366296	0.885857	0.375695	0.795359	18.7972	27.2469	30.8969	31.5661
273	Chr1:134929938-134931583	33.3673	-0.785671	0.349238	-2.24967	0.0244698	0.304534	43.8601	44.8255	26.2155	18.5683
274	Chr1:134942458-134943595	14.1605	-0.651099	0.416093	-1.56479	0.117632	0.575502	21.3035	16.6997	8.42641	10.2126
275	Chr1:135027228-135028618	50.9331	0.223872	0.305654	0.732436	0.463903	0.833452	48.8727	43.9465	51.4948	59.4185
276	Chr1:135237078-135238105	10.821	-0.678016	0.429327	-1.57926	0.114278	0.570391	18.7972	11.4261	7.49015	5.57049
277	Chr1:135389075-135390471	42.4111	0.345346	0.327069	1.05588	0.291022	0.753821	37.5944	35.1572	40.2595	56.6333
278	Chr1:135505911-135507241	25.8704	0.0888596	0.369754	0.240321	0.810082	0.961154	21.3035	28.1258	24.343	29.7093
279	Chr1:135557135-135558442	39.2253	0.332473	0.330945	1.00462	0.315081	0.768882	31.3286	36.0362	48.686	40.8503
280	Chr1:135560522-135561909	57.0103	0.463695	0.301538	1.53777	0.124106	0.585161	46.3664	46.5833	56.1761	78.9153
281	Chr1:135590827-135591489	15.2352	0.261216	0.411057	0.635474	0.525119	0.868133	15.0378	11.4261	14.9803	19.4967
282	Chr1:135975130-135976704	34.0786	0.779657	0.35527	2.19455	0.0281962	0.320803	15.0378	29.8836	48.686	42.7071
283	Chr1:136240918-136242176	32.5623	-0.0951831	0.349549	-0.272302	0.78539	0.954435	32.5818	35.1572	36.5145	25.9956
284	Chr1:136257804-136259355	59.6503	-0.0895608	0.303139	-0.295444	0.767654	0.951201	50.1258	72.9512	47.7497	67.7743
285	Chr1:136278453-136279715	17.2786	0.38978	0.404095	0.964576	0.334757	0.779716	17.544	10.5472	20.5979	20.4251
286	Chr1:136301988-136303486	56.5692	0.177455	0.300099	0.591323	0.554304	0.880023	51.379	53.6148	70.2201	51.0628
287	Chr1:136311129-136312737	56.834	-0.249534	0.295891	-0.84333	0.399044	0.808272	58.8979	65.9198	46.8134	55.7049
288	Chr1:136351466-136352867	26.4028	0.0928401	0.370483	0.250592	0.802129	0.959669	25.0629	25.489	33.7057	21.3535
289	Chr1:136390701-136391988	36.2076	-0.537218	0.341012	-1.57536	0.115173	0.570464	47.6195	41.3097	23.4067	32.4945
290	Chr1:136430150-136431548	33.7062	-1.64582	0.358275	-4.59372	4.35e-06	0.000929091	55.1384	54.4937	14.9803	10.2126
291	Chr1:136452782-136454020	30.2066	-0.00434672	0.355845	-0.0122152	0.990254	0.998448	25.0629	35.1572	30.8969	29.7093
292	Chr1:136858533-136859822	13.9163	0.263625	0.415427	0.634587	0.525698	0.868133	12.5315	11.4261	16.8528	14.8546
293	Chr1:137005157-137006213	10.4792	0.423474	0.428887	0.987379	0.323457	0.773728	8.77202	7.03145	14.044	12.0694
294	Chr1:137095512-137096712	14.2335	0.0797566	0.414293	0.192513	0.847341	0.967295	11.2783	15.8208	14.9803	14.8546
295	Chr1:137209446-137210764	25.4897	0.160017	0.373214	0.428753	0.668103	0.92305	18.7972	28.1258	30.8969	24.1388
296	Chr1:137326376-137327633	13.3471	0.461274	0.419232	1.10028	0.271209	0.741643	7.51888	12.305	16.8528	16.7115
297	Chr1:137662196-137663691	46.1756	-0.149184	0.325084	-0.458908	0.6463	0.915541	48.8727	49.2201	31.8331	54.7765
298	Chr1:138241863-138243076	14.0055	0.00917705	0.41973	0.0218641	0.982556	0.996982	17.544	10.5472	9.36268	18.5683
299	Chr1:138311295-138312665	56.9211	0.39565	0.295719	1.33792	0.180921	0.653553	51.379	44.8255	68.3476	63.1322
300	Chr1:138362404-138363660	11.5006	0.293695	0.426047	0.689349	0.490604	0.849532	7.51888	11.4261	15.9166	11.141
301	Chr1:138520991-138522368	33.6966	0.0267119	0.343097	0.0778552	0.937943	0.990177	35.0881	31.6415	33.7057	34.3513
302	Chr1:138571048-138572343	36.7153	0.484954	0.338443	1.4329	0.151887	0.627144	27.5692	30.7626	39.3233	49.206
303	Chr1:138592384-138593693	32.8111	0.533526	0.35565	1.50015	0.133577	0.596685	32.5818	18.4575	43.0683	37.1366
304	Chr1:140515277-140516681	27.5586	0.34021	0.372331	0.91373	0.360859	0.790315	27.5692	19.3365	23.4067	39.9218
305	Chr1:140859536-140861122	35.9606	-0.693644	0.338987	-2.04623	0.0407341	0.375106	45.1133	47.4623	24.343	26.924
306	Chr1:141318074-141319682	44.0667	-0.0838422	0.318983	-0.262842	0.792672	0.957144	50.1258	41.3097	41.1958	43.6355
307	Chr1:141350508-141352125	38.244	0.325748	0.335189	0.971835	0.331133	0.779716	36.3412	29.8836	48.686	38.065
308	Chr1:145549243-145550894	57.6096	0.326287	0.297747	1.09586	0.273142	0.742825	46.3664	53.6148	57.1124	73.3448
309	Chr1:145586711-145587904	16.7867	-0.163693	0.402827	-0.406362	0.684477	0.928203	18.7972	17.5786	15.9166	14.8546
310	Chr1:145623943-145625303	25.4707	-0.101701	0.371238	-0.273951	0.784123	0.954435	28.8224	24.6101	20.5979	27.8524
311	Chr1:145850610-145851975	36.0628	0.332837	0.347256	0.958476	0.337823	0.780963	22.5566	38.6729	46.8134	36.2082
312	Chr1:148170118-148170424	2.21615	-0.108591	0.366974	-0.295908	0.7673	0.951201	2.50629	2.63679	0.936268	2.78524
313	Chr1:152239290-152241253	66.9588	-0.0796796	0.279257	-0.285327	0.775394	0.953074	71.4293	66.7987	66.4751	63.1322
314	Chr1:152839853-152841054	13.6583	0.569512	0.418495	1.36086	0.173559	0.64479	11.2783	7.91038	19.6616	15.7831
315	Chr1:153097587-153098732	14.4709	-1.02376	0.418053	-2.44887	0.0143306	0.239477	26.3161	17.5786	7.49015	6.4989
316	Chr1:153191732-153192376	15.7037	0.401985	0.410513	0.979225	0.327469	0.777154	8.77202	15.8208	18.7254	19.4967
317	Chr1:153275293-153276644	28.7003	0.264172	0.368494	0.716898	0.473437	0.840073	25.0629	25.489	22.4704	41.7787
318	Chr1:153346860-153348425	42.5155	0.153378	0.321662	0.476829	0.633484	0.911928	40.1007	39.5519	42.1321	48.2776
319	Chr1:153392163-153392402	5.41805	0.472716	0.426586	1.10814	0.267803	0.740541	5.01258	1.75786	5.61761	9.28415
320	Chr1:153936749-153937896	10.6769	-0.602765	0.428315	-1.40729	0.159341	0.633476	13.7846	14.9418	6.55388	7.42732
321	Chr1:154612869-154614187	26.9426	0.148251	0.36875	0.402037	0.687657	0.928518	20.0503	29.8836	32.7694	25.0672
322	Chr1:154749469-154750802	50.9306	0.0990003	0.30694	0.322539	0.747044	0.945539	43.8601	53.6148	48.686	57.5617
323	Chr1:154761855-154763058	26.9065	0.770059	0.369787	2.08244	0.0373023	0.364007	20.0503	15.8208	31.8331	39.9218
324	Chr1:154856310-154857997	39.387	0.788968	0.335493	2.35167	0.0186894	0.272866	25.0629	28.1258	44.9409	59.4185
325	Chr1:155271781-155272903	13.9467	-0.774738	0.417024	-1.85778	0.0632005	0.446481	18.7972	20.2154	7.49015	9.28415
326	Chr1:155333977-155335379	46.0728	-0.12354	0.318584	-0.38778	0.698179	0.932473	43.8601	52.7358	50.5585	37.1366
327	Chr1:155746310-155747838	42.0049	0.714636	0.327541	2.18182	0.0291229	0.32488	32.5818	27.2469	58.9849	49.206
328	Chr1:155927055-155928303	16.9712	0.304197	0.402474	0.755817	0.449759	0.827853	13.7846	14.9418	19.6616	19.4967
329	Chr1:156902792-156903938	17.0646	-0.699942	0.407339	-1.71833	0.0857371	0.510946	21.3035	24.6101	7.49015	14.8546
330	Chr1:156946115-156947474	54.0014	-0.0846996	0.303326	-0.279236	0.780064	0.954435	52.6321	58.8884	59.9212	44.5639
331	Chr1:157589054-157590277	14.5614	0.466525	0.418909	1.11367	0.265421	0.739978	11.2783	10.5472	25.2792	11.141
332	Chr1:157659325-157660788	15.92	-0.799299	0.415225	-1.92498	0.0542321	0.412541	30.0755	14.9418	11.2352	7.42732
333	Chr1:157819561-157821252	29.0994	0.398592	0.363858	1.09546	0.273315	0.742825	17.544	29.8836	31.8331	37.1366
334	Chr1:157882023-157883781	67.9644	0.146931	0.279468	0.525755	0.599059	0.900048	67.6699	60.6462	67.4113	76.13
335	Chr1:157887487-157888739	28.6092	-0.384005	0.36052	-1.06514	0.286813	0.75096	32.5818	34.2783	27.1518	20.4251
336	Chr1:158488313-158489706	30.7826	0.138016	0.354061	0.38981	0.696677	0.931814	28.8224	29.0047	37.4507	27.8524
337	Chr1:158648492-158649739	24.7475	0.246554	0.375358	0.65685	0.511277	0.859718	23.8098	20.2154	22.4704	32.4945
338	Chr1:158868972-158870515	29.8718	-0.251453	0.354503	-0.70931	0.478132	0.843801	33.8349	32.5204	25.2792	27.8524
339	Chr1:159341909-159343243	26.1204	0.0837847	0.3677	0.227862	0.819754	0.962786	27.5692	22.8522	25.2792	28.7809
340	Chr1:161161511-161162902	33.2807	0.155093	0.35797	0.433257	0.664828	0.921964	20.0503	41.3097	32.7694	38.9934
341	Chr1:162124914-162126219	21.8554	0.0785924	0.388618	0.202235	0.839733	0.965208	16.2909	25.489	17.7891	27.8524
342	Chr1:162142741-162144049	50.9945	0.211579	0.306778	0.68968	0.490395	0.849532	43.8601	49.2201	49.6222	61.2754
343	Chr1:162664320-162665545	20.8092	0.159797	0.387485	0.412396	0.68005	0.926792	20.0503	18.4575	19.6616	25.0672
344	Chr1:162964698-162966495	148.816	-0.193899	0.22566	-0.859251	0.390202	0.803578	139.099	179.302	133.886	142.976
345	Chr1:163000015-163001303	33.4972	0.00281047	0.343311	0.00818636	0.993468	0.998818	32.5818	34.2783	33.7057	33.4229
346	Chr1:163806699-163807983	24.6261	0.0877983	0.378696	0.231844	0.816659	0.962664	22.5566	24.6101	32.7694	18.5683
347	Chr1:164499851-164501065	24.0586	0.430617	0.384358	1.12035	0.262564	0.738815	20.0503	18.4575	19.6616	38.065
348	Chr1:164669638-164671365	53.0292	-0.198935	0.307849	-0.646211	0.518143	0.863606	50.1258	64.1619	41.1958	56.6333
349	Chr1:165333315-165334573	26.1283	-0.00515086	0.366535	-0.0140529	0.988788	0.998448	25.0629	27.2469	25.2792	26.924
350	Chr1:165859435-165860891	22.9158	-0.374122	0.393005	-0.951953	0.341121	0.782537	35.0881	19.3365	12.1715	25.0672
351	Chr1:165924529-165925713	18.3372	-0.282822	0.396819	-0.712722	0.476018	0.842317	18.7972	22.8522	15.9166	15.7831
352	Chr1:166178723-166180138	32.7853	0.478249	0.349665	1.36774	0.171395	0.642788	23.8098	28.1258	34.6419	44.5639
353	Chr1:166387710-166389049	38.2252	-0.407308	0.338499	-1.20328	0.22887	0.70419	43.8601	45.7044	24.343	38.9934
354	Chr1:166424220-166425327	24.0933	0.11063	0.37691	0.293518	0.769126	0.951348	27.5692	18.4575	25.2792	25.0672
355	Chr1:166432669-166434041	24.358	0.120739	0.373422	0.323332	0.746444	0.945539	25.0629	21.0943	25.2792	25.9956
356	Chr1:167389903-167391557	47.3425	-0.230432	0.310889	-0.741204	0.45857	0.831857	52.6321	50.978	41.1958	44.5639
357	Chr1:167563844-167565226	30.6007	-0.201271	0.353194	-0.569861	0.568772	0.885561	31.3286	35.1572	25.2792	30.6377
358	Chr1:167571197-167573270	64.0191	-0.191733	0.286691	-0.668778	0.503637	0.854477	66.4167	71.1934	66.4751	51.9912
359	Chr1:167932505-167934070	61.2107	0.0196103	0.288889	0.0678819	0.94588	0.992421	66.4167	55.3726	59.9212	63.1322
360	Chr1:168054377-168055665	29.1364	0.602653	0.35913	1.67809	0.0933293	0.528059	20.0503	22.8522	35.5782	38.065
361	Chr1:168308532-168309723	14.1602	0.14805	0.416835	0.355177	0.722457	0.940301	10.0252	15.8208	18.7254	12.0694
362	Chr1:169198854-169199571	13.6055	0.515053	0.420856	1.22382	0.221019	0.699628	13.7846	6.15251	15.9166	18.5683
363	Chr1:169214169-169215707	42.6835	-0.2087	0.330682	-0.63112	0.527962	0.869867	56.3916	36.9151	44.0046	33.4229
364	Chr1:169237991-169239326	38.7437	0.418516	0.332725	1.25784	0.208449	0.685045	27.5692	36.0362	45.8771	45.4923
365	Chr1:169323776-169325021	19.1689	0.94195	0.40098	2.34912	0.018818	0.274082	13.7846	7.91038	24.343	30.6377
366	Chr1:169845339-169846939	28.2155	0.479405	0.364709	1.31449	0.188683	0.663378	26.3161	18.4575	37.4507	30.6377
367	Chr1:171898806-171900009	17.9714	-0.0891892	0.398438	-0.223847	0.822876	0.962786	16.2909	21.0943	17.7891	16.7115
368	Chr1:172104340-172105559	15.4282	0.243851	0.411863	0.592069	0.553805	0.880023	17.544	9.66824	17.7891	16.7115
369	Chr1:172814707-172816077	17.9882	0.643	0.405047	1.58747	0.112406	0.567968	11.2783	13.184	16.8528	30.6377
370	Chr1:172968092-172969296	17.3273	-0.435857	0.402064	-1.08405	0.278342	0.745045	23.8098	18.4575	14.044	12.9978
371	Chr1:172974355-172975618	17.0132	0.751691	0.405045	1.85582	0.0634792	0.446998	10.0252	11.4261	21.5342	25.0672
372	Chr1:173032279-173033760	28.0275	0.220067	0.361338	0.609033	0.542503	0.87567	25.0629	25.489	33.7057	27.8524
373	Chr1:173040847-173042377	30.7632	0.353704	0.352963	1.0021	0.316296	0.769139	27.5692	24.6101	37.4507	33.4229
374	Chr1:173079998-173081182	15.1857	0.274072	0.421874	0.649654	0.515916	0.863487	20.0503	6.15251	22.4704	12.0694
375	Chr1:173125751-173127046	17.3266	0.16324	0.40419	0.403868	0.68631	0.928203	18.7972	13.184	22.4704	14.8546
376	Chr1:173176516-173177734	18.1634	0.269945	0.399132	0.67633	0.498831	0.852033	17.544	14.0629	23.4067	17.6399
377	Chr1:173199671-173200940	30.3308	-0.524541	0.360504	-1.45502	0.145663	0.615959	41.3538	33.3994	17.7891	28.7809
378	Chr1:173217179-173218591	32.0034	0.360255	0.355103	1.01451	0.31034	0.76796	20.0503	33.3994	34.6419	39.9218
379	Chr1:173224021-173225589	36.305	0.261977	0.339883	0.770786	0.440834	0.825676	26.3161	37.794	40.2595	40.8503
380	Chr1:173258919-173260245	30.1754	0.289587	0.356374	0.812593	0.416452	0.81649	26.3161	26.3679	29.0243	38.9934
381	Chr1:173275331-173276670	27.6832	0.0228277	0.362044	0.0630522	0.949725	0.99329	27.5692	27.2469	25.2792	30.6377
382	Chr1:173340762-173341921	17.9408	-0.0768137	0.398169	-0.192917	0.847024	0.967295	18.7972	18.4575	18.7254	15.7831
383	Chr1:173407785-173409029	16.4414	0.0613911	0.412108	0.148969	0.881578	0.975857	22.5566	9.66824	14.044	19.4967
384	Chr1:173432794-173434043	25.5474	-0.187579	0.369296	-0.507937	0.611498	0.904716	30.0755	25.489	24.343	22.282
385	Chr1:174012121-174013300	16.7601	0.325684	0.419758	0.775884	0.437817	0.824325	20.0503	7.91038	10.299	28.7809
386	Chr1:174077346-174079109	36.9952	0.895998	0.343618	2.60754	0.00911951	0.188181	28.8224	18.4575	51.4948	49.206
387	Chr1:174239533-174240781	12.1787	0.316452	0.423468	0.747288	0.45489	0.830222	7.51888	12.305	13.1078	15.7831
388	Chr1:174450398-174451616	20.9548	0.37261	0.40034	0.930734	0.351991	0.786381	21.3035	13.184	14.9803	34.3513
389	Chr1:177554929-177556261	20.5344	0.17884	0.388284	0.460591	0.645092	0.915388	16.2909	21.0943	22.4704	22.282
390	Chr1:177621991-177623300	35.4669	-0.0671408	0.338031	-0.198623	0.842558	0.965687	35.0881	37.794	33.7057	35.2798
391	Chr1:177810189-177811699	22.6705	0.462262	0.391071	1.18204	0.237189	0.710032	22.5566	13.184	19.6616	35.2798
392	Chr1:178743510-178744682	19.8521	-0.0294759	0.390423	-0.0754973	0.939819	0.991142	20.0503	20.2154	17.7891	21.3535
393	Chr1:179371492-179372748	29.5742	-0.227121	0.360721	-0.629629	0.528938	0.870377	32.5818	32.5204	32.7694	20.4251
394	Chr1:179725814-179727122	37.243	-0.0862682	0.335361	-0.25724	0.796994	0.957797	37.5944	39.5519	40.2595	31.5661
395	Chr1:180247916-180249770	110.456	0.0372486	0.241058	0.154522	0.877198	0.974634	115.289	102.835	104.862	118.837
396	Chr1:180266026-180268651	139.376	0.364879	0.225935	1.61497	0.106317	0.557348	114.036	126.566	147.93	168.971
397	Chr1:180298505-180299719	20.3786	-0.130447	0.388194	-0.336036	0.736844	0.944525	21.3035	21.9733	20.5979	17.6399
398	Chr1:180335359-180337813	89.734	0.589256	0.257076	2.29214	0.0218974	0.288796	73.9356	65.9198	107.671	111.41
399	Chr1:181580769-181581969	12.4394	-1.61143	0.42875	-3.75844	0.000170977	0.016545	21.3035	22.8522	3.74507	1.85683
400	Chr1:181732608-181734312	60.1594	0.072565	0.289595	0.250574	0.802143	0.959669	55.1384	61.5251	58.9849	64.989
401	Chr1:181889764-181890658	21.9828	-0.0850127	0.390087	-0.217933	0.827481	0.962798	27.5692	18.4575	14.9803	26.924
402	Chr1:182125474-182126890	48.4624	-0.377474	0.311167	-1.21309	0.225094	0.702511	56.3916	55.3726	45.8771	36.2082
403	Chr1:182294926-182296179	16.7665	-0.0947348	0.404812	-0.234022	0.814968	0.962664	21.3035	14.0629	15.9166	15.7831
404	Chr1:182498624-182499777	19.5951	0.559438	0.394994	1.41632	0.156682	0.631571	17.544	11.4261	24.343	25.0672
405	Chr1:182570549-182572379	71.5741	0.219997	0.281708	0.780939	0.434838	0.823202	63.9104	66.7987	64.6025	90.9847
406	Chr1:182698038-182699233	18.8437	-0.238334	0.407204	-0.585293	0.558351	0.882209	31.3286	11.4261	14.9803	17.6399
407	Chr1:182707449-182708754	24.0396	-0.314185	0.381764	-0.822984	0.410517	0.813411	28.8224	26.3679	14.044	26.924
408	Chr1:182723475-182724808	24.5614	0.15065	0.375471	0.401229	0.688252	0.928604	27.5692	18.4575	27.1518	25.0672
409	Chr1:182731457-182732590	20.9407	0.0942217	0.391377	0.240744	0.809753	0.961154	18.7972	21.0943	28.088	15.7831
410	Chr1:182742698-182744989	86.3243	0.407834	0.265896	1.53381	0.125076	0.587234	61.4041	83.4984	93.6268	106.768
411	Chr1:182780160-182781978	92.4807	0.398981	0.256822	1.55353	0.120296	0.578959	85.2139	72.0723	114.225	98.412
412	Chr1:182817918-182820330	88.6513	0.79888	0.258708	3.08796	0.00201536	0.0783135	60.151	64.1619	116.097	114.195
413	Chr1:182833729-182834998	37.9442	0.0352932	0.334724	0.10544	0.916027	0.985405	31.3286	43.0676	38.387	38.9934
414	Chr1:182854158-182855997	33.0826	0.632811	0.347053	1.82339	0.0682448	0.462341	23.8098	24.6101	42.1321	41.7787
415	Chr1:183073593-183074861	29.2307	0.271982	0.358308	0.759073	0.447809	0.826883	28.8224	22.8522	30.8969	34.3513
416	Chr1:183080733-183081928	17.0954	0.279737	0.402648	0.694743	0.487216	0.848912	12.5315	16.6997	18.7254	20.4251
417	Chr1:183771705-183773227	46.3888	0.217644	0.318587	0.683155	0.494509	0.852033	33.8349	50.099	50.5585	51.0628
418	Chr1:183810616-183811622	7.47394	-0.562035	0.434221	-1.29435	0.195544	0.672039	10.0252	10.5472	4.68134	4.64207
419	Chr1:183960294-183961459	25.9211	0.59533	0.37469	1.58886	0.112092	0.56776	13.7846	23.7311	29.9606	36.2082
420	Chr1:184054636-184055544	19.1112	-0.060104	0.394523	-0.152346	0.878914	0.975144	16.2909	22.8522	19.6616	17.6399
421	Chr1:184211917-184213430	51.9481	0.167337	0.302099	0.553915	0.579637	0.88966	47.6195	49.2201	56.1761	54.7765
422	Chr1:184270907-184272228	22.2892	0.305567	0.38364	0.796493	0.425746	0.817314	15.0378	22.8522	24.343	26.924
423	Chr1:184338396-184340115	36.5057	0.185124	0.342155	0.541051	0.588472	0.894789	41.3538	26.3679	37.4507	40.8503
424	Chr1:185857288-185858808	19.3576	0.125779	0.394346	0.318956	0.74976	0.946097	18.7972	17.5786	24.343	16.7115
425	Chr1:186669016-186670206	18.6832	-0.320955	0.396838	-0.808781	0.418641	0.81649	17.544	25.489	15.9166	15.7831
426	Chr1:186706140-186707269	14.348	-0.551689	0.414089	-1.33229	0.182763	0.655867	17.544	19.3365	10.299	10.2126
427	Chr1:187027317-187028544	26.955	0.273772	0.368628	0.742679	0.457676	0.831857	22.5566	24.6101	36.5145	24.1388
428	Chr1:187033294-187034594	28.7224	0.392077	0.361697	1.08399	0.278368	0.745045	27.5692	20.2154	30.8969	36.2082
429	Chr1:187152341-187153541	18.6323	-0.363096	0.39678	-0.915107	0.360136	0.790153	20.0503	23.7311	13.1078	17.6399
430	Chr1:187186311-187187732	33.3626	-0.0899569	0.344621	-0.261031	0.794069	0.95738	31.3286	37.794	31.8331	32.4945
431	Chr1:187940438-187941638	11.4477	0.403091	0.428113	0.941553	0.346422	0.784682	12.5315	5.27358	15.9166	12.0694
432	Chr1:188572465-188573707	26.6042	0.0342887	0.366848	0.0934684	0.925531	0.986843	25.0629	27.2469	30.8969	23.2104
433	Chr1:188790847-188792058	23.0439	0.42772	0.3833	1.11589	0.264469	0.73955	21.3035	15.8208	32.7694	22.282
434	Chr1:189038675-189039840	15.6449	0.62252	0.417077	1.49258	0.135547	0.599271	16.2909	5.27358	19.6616	21.3535
435	Chr1:190830994-190832210	19.2474	-0.111487	0.392862	-0.283781	0.776578	0.953589	21.3035	19.3365	16.8528	19.4967
436	Chr1:191511261-191512798	29.348	0.7721	0.364254	2.11968	0.0340334	0.349727	18.7972	20.2154	46.8134	31.5661
437	Chr1:192751949-192753480	30.4147	0.618912	0.356727	1.73497	0.0827455	0.504475	18.7972	25.489	37.4507	39.9218
438	Chr1:192802459-192803654	8.70992	0.532471	0.367326	1.44958	0.147174	0.619517	5.01258	0	14.044	15.7831
439	Chr1:192849338-192850521	28.6098	-0.181266	0.364133	-0.497801	0.618624	0.90635	37.5944	24.6101	29.0243	23.2104
440	Chr1:192886447-192887744	18.0419	1.11626	0.404877	2.75705	0.00583257	0.143182	7.51888	9.66824	24.343	30.6377
441	Chr1:193220726-193222258	28.1134	0.732146	0.366392	1.99826	0.0456885	0.387294	15.0378	22.8522	34.6419	39.9218
442	Chr1:193398504-193400400	90.1702	0.682639	0.256673	2.65957	0.0078241	0.173103	66.4167	67.6777	117.034	109.553
443	Chr1:193541230-193542617	27.4378	-0.220751	0.362233	-0.609416	0.542248	0.87567	31.3286	29.0047	25.2792	24.1388
444	Chr1:193644751-193646382	61.244	0.122196	0.28857	0.423451	0.671966	0.925079	53.8853	62.4041	67.4113	61.2754
445	Chr1:193729937-193731128	21.7938	0.231185	0.388855	0.594526	0.55216	0.879757	17.544	21.0943	30.8969	17.6399
446	Chr1:193787836-193789055	11.7371	-0.720685	0.427717	-1.68496	0.0919967	0.524381	16.2909	16.6997	3.74507	10.2126
447	Chr1:194571029-194572614	65.0107	-0.0799339	0.287778	-0.277762	0.781195	0.954435	66.4167	67.6777	73.0289	52.9196
448	Chr1:194861198-194862393	11.8842	0.680505	0.425605	1.59891	0.10984	0.563208	8.77202	6.15251	14.044	18.5683
449	Chr1:194999271-195000478	18.3975	0.175475	0.396587	0.442462	0.658155	0.919715	15.0378	18.4575	20.5979	19.4967
450	Chr1:196956715-196958241	34.5507	0.206004	0.34475	0.597546	0.550143	0.879256	27.5692	35.1572	32.7694	42.7071
451	Chr10:4521775-4523030	23.1865	0.153901	0.388507	0.396134	0.692006	0.929301	12.5315	29.8836	23.4067	26.924
452	Chr10:4540103-4541832	51.6712	0.393722	0.308017	1.27825	0.201161	0.674251	36.3412	50.099	57.1124	63.1322
453	Chr10:5150882-5152158	15.6194	-0.610735	0.410979	-1.48605	0.137266	0.601514	22.5566	18.4575	13.1078	8.35573
454	Chr10:5913341-5914944	61.9496	-0.185124	0.287478	-0.643959	0.519602	0.864998	68.923	64.1619	61.7937	52.9196
455	Chr10:5958589-5959878	54.8263	-0.0899786	0.303422	-0.296546	0.766813	0.951201	63.9104	50.099	45.8771	59.4185
456	Chr10:6011614-6012838	34.0181	0.292245	0.354548	0.824274	0.409784	0.81309	20.0503	38.6729	34.6419	42.7071
457	Chr10:6055796-6056981	9.6415	-0.290091	0.431055	-0.672981	0.50096	0.853487	11.2783	11.4261	9.36268	6.4989
458	Chr10:6079445-6081361	52.7436	0.684206	0.305673	2.23836	0.0251978	0.307721	36.3412	40.4308	60.8574	73.3448
459	Chr10:6102338-6104183	56.362	-0.173677	0.302427	-0.574278	0.56578	0.884503	48.8727	71.1934	56.1761	49.206
460	Chr10:6372215-6373888	59.0118	0.108212	0.291543	0.371169	0.710512	0.93567	57.6447	55.3726	57.1124	65.9175
461	Chr10:7382406-7383584	24.8577	0.448294	0.372565	1.20326	0.228874	0.70419	21.3035	18.4575	29.9606	29.7093
462	Chr10:7386703-7387974	27.2504	-0.276003	0.364953	-0.756271	0.449487	0.827573	35.0881	26.3679	23.4067	24.1388
463	Chr10:7400290-7401751	32.4541	-0.328322	0.348688	-0.941592	0.346401	0.784682	32.5818	41.3097	26.2155	29.7093
464	Chr10:7445200-7446520	21.4359	-0.352877	0.388679	-0.907887	0.363938	0.791571	30.0755	20.2154	20.5979	14.8546
465	Chr10:7511874-7513342	35.4332	0.0906876	0.339758	0.266918	0.789532	0.956527	33.8349	34.2783	32.7694	40.8503
466	Chr10:7675333-7676984	51.494	-0.0188005	0.310949	-0.0604619	0.951788	0.993701	46.3664	57.1305	42.1321	60.347
467	Chr10:8237862-8239067	17.4675	-0.6129	0.404572	-1.51493	0.129789	0.59152	26.3161	19.3365	9.36268	14.8546
468	Chr10:8605395-8606599	26.6045	-0.0786077	0.370035	-0.212433	0.831769	0.964341	28.8224	26.3679	19.6616	31.5661
469	Chr10:10868702-10870026	22.1494	-0.112215	0.381734	-0.293961	0.768787	0.951348	23.8098	22.8522	18.7254	23.2104
470	Chr10:11000018-11001838	75.7907	-0.0307996	0.278117	-0.110743	0.91182	0.983305	71.4293	81.7406	61.7937	88.1994
471	Chr10:11062615-11063954	35.7902	-0.174464	0.34158	-0.510755	0.609522	0.904716	40.1007	36.9151	27.1518	38.9934
472	Chr10:12334139-12335375	29.156	0.348155	0.361535	0.962992	0.335552	0.779716	27.5692	21.9733	28.088	38.9934
473	Chr10:12588505-12589917	48.7588	0.00824484	0.313795	0.0262746	0.979038	0.995522	48.8727	48.3412	40.2595	57.5617
474	Chr10:12641815-12643393	36.2958	0.134627	0.338147	0.398132	0.690533	0.92901	38.8475	29.8836	38.387	38.065
475	Chr10:12727389-12728621	18.74	0.411538	0.398765	1.03203	0.302058	0.761922	18.7972	11.4261	20.5979	24.1388
476	Chr10:12780331-12781538	13.19	-0.535802	0.419787	-1.27637	0.201826	0.674532	20.0503	14.0629	9.36268	9.28415
477	Chr10:12810125-12811352	14.4625	-1.27362	0.41848	-3.04345	0.00233885	0.0842594	23.8098	22.8522	5.61761	5.57049
478	Chr10:12912124-12913421	18.2804	-0.206858	0.39928	-0.518079	0.604403	0.902851	23.8098	16.6997	14.044	18.5683
479	Chr10:13043343-13044505	12.4584	-0.188765	0.421611	-0.447723	0.654353	0.918259	12.5315	14.9418	9.36268	12.9978
480	Chr10:14424599-14425786	11.7666	-0.0742525	0.42506	-0.174687	0.861326	0.969524	15.0378	9.66824	9.36268	12.9978
481	Chr10:17295373-17296641	33.6514	0.796626	0.353459	2.2538	0.0242088	0.30387	27.5692	17.5786	39.3233	50.1344
482	Chr10:17442200-17443770	52.0922	0.0444116	0.303286	0.146434	0.883578	0.976673	47.6195	54.4937	49.6222	56.6333
483	Chr10:17742208-17743436	22.8077	-0.490686	0.381607	-1.28584	0.198498	0.674066	25.0629	30.7626	14.9803	20.4251
484	Chr10:17774893-17776234	27.9229	-0.104532	0.362235	-0.288575	0.772907	0.953074	31.3286	27.2469	23.4067	29.7093
485	Chr10:17954065-17955546	24.1281	0.683831	0.377862	1.80974	0.0703367	0.4691	13.7846	19.3365	30.8969	32.4945
486	Chr10:18734624-18735897	16.0982	0.166865	0.412135	0.404879	0.685566	0.928203	8.77202	20.2154	14.9803	20.4251
487	Chr10:18927663-18928894	21.2008	1.23362	0.396061	3.11472	0.00184118	0.0766114	12.5315	7.03145	29.9606	35.2798
488	Chr10:19626719-19628011	35.1744	0.0839671	0.339447	0.247364	0.804626	0.960298	36.3412	31.6415	35.5782	37.1366
489	Chr10:20031387-20033511	84.9724	0.0893953	0.27243	0.32814	0.742806	0.945539	77.695	86.1352	70.2201	105.839
490	Chr10:20066799-20068354	60.7679	-0.307622	0.295883	-1.03968	0.298491	0.759787	75.1888	61.5251	61.7937	44.5639
491	Chr10:20671271-20672866	27.0554	0.928192	0.374912	2.47576	0.0132954	0.228773	21.3035	11.4261	34.6419	40.8503
492	Chr10:20774106-20774739	6.0534	0.849425	0.429121	1.97945	0.047765	0.392399	3.75944	0.878931	9.36268	10.2126
493	Chr10:21495945-21496897	17.7535	0.710435	0.402693	1.76421	0.0776965	0.492078	13.7846	9.66824	25.2792	22.282
494	Chr10:21546736-21547936	24.7074	0.419752	0.376502	1.11487	0.264904	0.73955	22.5566	17.5786	24.343	34.3513
495	Chr10:21713798-21715090	38.5623	0.0346257	0.332482	0.104143	0.917056	0.985447	36.3412	39.5519	44.0046	34.3513
496	Chr10:21719639-21720891	25.0659	-0.476479	0.373802	-1.27468	0.202422	0.675442	33.8349	27.2469	22.4704	16.7115
497	Chr10:22450763-22452007	33.2845	0.228142	0.352506	0.647199	0.517503	0.863606	37.5944	22.8522	32.7694	39.9218
498	Chr10:23502526-23505113	218.022	-0.283168	0.351603	-0.805364	0.42061	0.81649	205.516	283.895	241.557	141.119
499	Chr10:23506336-23507608	80.4518	-0.0626589	0.269389	-0.232597	0.816075	0.962664	70.1762	94.0456	81.4553	76.13
500	Chr10:23532184-23533381	14.0964	0.547236	0.418645	1.30716	0.191158	0.665812	11.2783	8.78931	13.1078	23.2104
501	Chr10:23851535-23852759	13.5157	1.39835	0.428744	3.26151	0.00110819	0.0542493	7.51888	0.878931	20.5979	25.0672
502	Chr10:24314638-24315959	30.1958	-0.0979123	0.353146	-0.277257	0.781583	0.954435	31.3286	31.6415	29.9606	27.8524
503	Chr10:25016197-25017505	25.1314	-0.0202701	0.38281	-0.0529507	0.957771	0.994302	15.0378	35.1572	23.4067	26.924
504	Chr10:27793770-27795387	49.413	0.137343	0.315614	0.435161	0.663445	0.920716	47.6195	45.7044	41.1958	63.1322
505	Chr10:29032516-29033882	23.1844	0.353786	0.379292	0.932753	0.350947	0.786381	17.544	21.0943	29.9606	24.1388
506	Chr10:29081047-29082620	53.0164	-0.163306	0.302001	-0.540745	0.588683	0.894789	61.4041	51.8569	46.8134	51.9912
507	Chr10:29919536-29921038	36.6529	0.0758974	0.349317	0.217274	0.827995	0.962909	37.5944	33.3994	49.6222	25.9956
508	Chr10:30319748-30321349	30.9465	0.182771	0.355574	0.514015	0.607241	0.904305	25.0629	31.6415	28.088	38.9934
509	Chr10:30337425-30338928	39.4708	0.170886	0.330515	0.517031	0.605135	0.903085	32.5818	40.4308	45.8771	38.9934
510	Chr10:30522165-30523727	29.933	-0.107733	0.355363	-0.303162	0.761766	0.948948	33.8349	29.0047	30.8969	25.9956
511	Chr10:30530353-30531618	26.8573	-0.334728	0.366183	-0.9141	0.360664	0.790315	30.0755	31.6415	26.2155	19.4967
512	Chr10:30562107-30563401	17.6689	0.197469	0.40364	0.48922	0.624686	0.910285	11.2783	20.2154	22.4704	16.7115
513	Chr10:31032733-31034013	27.7218	0.0138809	0.361596	0.0383879	0.969378	0.995221	25.0629	29.8836	28.088	27.8524
514	Chr10:33343701-33344879	11.6981	0.349661	0.424457	0.823784	0.410063	0.81309	10.0252	8.78931	14.9803	12.9978
515	Chr10:33738670-33739860	24.9722	0.116407	0.377436	0.308416	0.757766	0.947729	30.0755	17.5786	29.0243	23.2104
516	Chr10:33926257-33927431	36.6723	-0.0389369	0.35421	-0.109926	0.912468	0.983346	45.1133	29.8836	24.343	47.3492
517	Chr10:34001332-34002572	21.8753	-0.394221	0.386139	-1.02093	0.307287	0.764725	30.0755	21.9733	20.5979	14.8546
518	Chr10:34137500-34138826	23.1412	-0.371341	0.380113	-0.976924	0.328607	0.778867	28.8224	25.489	22.4704	15.7831
519	Chr10:36331101-36332551	22.3788	0.406451	0.381179	1.0663	0.286288	0.75096	18.7972	17.5786	26.2155	26.924
520	Chr10:36693576-36695058	36.9532	-0.339764	0.334439	-1.01592	0.309667	0.76698	41.3538	43.0676	30.8969	32.4945
521	Chr10:39253707-39254875	12.4479	0.724197	0.424338	1.70665	0.0878871	0.514705	10.0252	5.27358	16.8528	17.6399
522	Chr10:39450702-39452688	99.3378	0.0333187	0.247175	0.134798	0.892771	0.978517	93.9859	101.956	103.926	97.4836
523	Chr10:39618218-39619576	29.3067	0.515835	0.358703	1.43806	0.150418	0.624945	22.5566	22.8522	39.3233	32.4945
524	Chr10:39966076-39967276	25.0687	0.1267	0.372542	0.340095	0.733785	0.944525	22.5566	24.6101	22.4704	30.6377
525	Chr10:39976947-39979097	144.655	-0.234327	0.237328	-0.987358	0.323467	0.773728	126.568	187.212	139.504	125.336
526	Chr10:40020267-40022695	72.141	-0.245634	0.272595	-0.901096	0.367537	0.792128	78.9482	79.1038	63.6662	66.8459
527	Chr10:40068148-40069429	33.6411	0.285463	0.345144	0.827084	0.40819	0.812863	30.0755	29.0047	33.7057	41.7787
528	Chr10:40603130-40604778	29.0457	-0.236425	0.357839	-0.660703	0.508803	0.857553	28.8224	35.1572	25.2792	26.924
529	Chr10:41007966-41009167	14.384	0.212403	0.419563	0.506248	0.612683	0.904716	18.7972	7.03145	16.8528	14.8546
530	Chr10:41169704-41170949	31.4881	0.0757001	0.365264	0.207248	0.835816	0.965208	26.3161	34.2783	44.0046	21.3535
531	Chr10:41238195-41240088	92.4037	-0.0546334	0.252792	-0.21612	0.828894	0.963281	96.4922	92.2877	86.1367	94.6983
532	Chr10:41529346-41530726	29.6918	0.229351	0.363664	0.630667	0.528258	0.870183	28.8224	24.6101	41.1958	24.1388
533	Chr10:41997159-41998723	45.3788	0.273824	0.318796	0.858931	0.390378	0.803743	43.8601	36.9151	56.1761	44.5639
534	Chr10:42194203-42195398	28.535	0.255216	0.365129	0.698975	0.484568	0.847179	28.8224	21.9733	25.2792	38.065
535	Chr10:42197452-42198881	29.9418	-0.0137185	0.35458	-0.0386895	0.969138	0.995221	27.5692	32.5204	30.8969	28.7809
536	Chr10:42204642-42205829	8.94289	-0.77079	0.433671	-1.77736	0.0755088	0.483001	15.0378	11.4261	2.8088	6.4989
537	Chr10:42221316-42222627	33.9759	-0.318587	0.343146	-0.92843	0.353184	0.787165	37.5944	39.5519	31.8331	26.924
538	Chr10:42398231-42399453	13.0201	-0.127354	0.418699	-0.304167	0.761001	0.948649	13.7846	14.0629	11.2352	12.9978
539	Chr10:42480827-42482152	22.4145	0.072746	0.38224	0.190315	0.849062	0.967528	17.544	25.489	24.343	22.282
540	Chr10:42940454-42941718	27.8946	-0.116274	0.363655	-0.319737	0.749168	0.946097	25.0629	33.3994	23.4067	29.7093
541	Chr10:43198121-43199410	47.9218	-0.0778844	0.31483	-0.247386	0.80461	0.960298	41.3538	57.1305	43.0683	50.1344
542	Chr10:43298238-43299653	35.9937	0.121496	0.351724	0.345429	0.729772	0.942599	37.5944	30.7626	49.6222	25.9956
543	Chr10:43620805-43622314	37.9818	-0.110853	0.33812	-0.327852	0.743024	0.945539	32.5818	46.5833	41.1958	31.5661
544	Chr10:43987478-43988994	29.1527	-0.384563	0.35747	-1.07579	0.28202	0.748397	33.8349	34.2783	26.2155	22.282
545	Chr10:44786451-44787375	15.8295	0.290985	0.407494	0.714085	0.475175	0.841363	13.7846	13.184	16.8528	19.4967
546	Chr10:45188668-45189914	18.026	1.47546	0.408493	3.61196	0.000303891	0.0250394	6.26573	6.15251	31.8331	27.8524
547	Chr10:45205344-45206816	27.1504	0.690175	0.366406	1.88363	0.0596149	0.433063	17.544	20.2154	33.7057	37.1366
548	Chr10:45297178-45298584	21.6191	-0.470564	0.386011	-1.21904	0.222828	0.700876	30.0755	22.8522	14.9803	18.5683
549	Chr10:50311965-50313204	22.0759	-0.808124	0.384206	-2.10336	0.0354341	0.355281	31.3286	29.0047	14.044	13.9262
550	Chr10:50613796-50615015	12.0499	0.276093	0.424717	0.650064	0.515651	0.863487	8.77202	11.4261	17.7891	10.2126
551	Chr10:52101397-52102755	32.2193	0.0952578	0.348801	0.2731	0.784776	0.954435	30.0755	31.6415	37.4507	29.7093
552	Chr10:52136768-52138120	45.1718	-0.460121	0.319519	-1.44004	0.149856	0.624945	46.3664	60.6462	39.3233	34.3513
553	Chr10:53098887-53100115	16.602	-0.887103	0.410303	-2.16207	0.0306128	0.331287	27.5692	20.2154	6.55388	12.0694
554	Chr10:53316197-53317139	31.3015	-0.0360848	0.353873	-0.101971	0.91878	0.985447	33.8349	29.8836	25.2792	36.2082
555	Chr10:53348792-53350243	34.762	0.0883199	0.349845	0.252454	0.80069	0.959307	25.0629	41.3097	30.8969	41.7787
556	Chr10:55834849-55836116	24.1478	-0.0213361	0.376062	-0.0567356	0.954756	0.993712	28.8224	20.2154	24.343	23.2104
557	Chr10:55948060-55949263	13.8168	0.416503	0.418102	0.996174	0.319166	0.771029	13.7846	7.91038	17.7891	15.7831
558	Chr10:56098040-56099200	18.2665	1.5704	0.408825	3.84124	0.000122415	0.0141492	6.26573	5.27358	29.9606	31.5661
559	Chr10:56126185-56127322	11.3569	-0.375152	0.426095	-0.880443	0.37862	0.79787	16.2909	11.4261	8.42641	9.28415
560	Chr10:57205572-57206781	20.7477	0.106691	0.389636	0.273821	0.784222	0.954435	16.2909	22.8522	25.2792	18.5683
561	Chr10:57251465-57252803	26.3833	0.835401	0.370652	2.25387	0.0242044	0.30387	18.7972	14.9418	36.5145	35.2798
562	Chr10:57785056-57786314	22.5803	0.437853	0.382486	1.14476	0.25231	0.728356	21.3035	14.9418	27.1518	26.924
563	Chr10:57908911-57910431	71.8643	-0.275147	0.27514	-1.00003	0.317298	0.769167	72.6825	86.1352	61.7937	66.8459
564	Chr10:57960173-57961416	35.7564	0.00243246	0.338461	0.00718682	0.994266	0.998818	32.5818	38.6729	33.7057	38.065
565	Chr10:58683809-58685039	28.0121	0.365699	0.361601	1.01134	0.311856	0.768882	21.3035	25.489	31.8331	33.4229
566	Chr10:58785343-58786741	66.7671	0.0248826	0.296035	0.0840529	0.933014	0.988436	76.4419	56.2516	81.4553	52.9196
567	Chr10:59078729-59079994	19.9604	-0.0139377	0.398476	-0.0349775	0.972098	0.995522	12.5315	27.2469	16.8528	23.2104
568	Chr10:59341764-59343366	41.6529	0.238019	0.323928	0.73479	0.462467	0.833452	40.1007	35.1572	44.0046	47.3492
569	Chr10:59413875-59415256	28.9814	0.0399361	0.358984	0.111247	0.91142	0.983048	32.5818	24.6101	29.0243	29.7093
570	Chr10:59465025-59466342	37.8269	-0.0299569	0.341228	-0.0877912	0.930043	0.98823	38.8475	37.794	46.8134	27.8524
571	Chr10:59656342-59657545	9.7265	0.381179	0.431642	0.88309	0.377188	0.795994	5.01258	9.66824	10.299	13.9262
572	Chr10:59739939-59741191	19.5455	0.856679	0.397356	2.15595	0.0310879	0.334688	10.0252	13.184	23.4067	31.5661
573	Chr10:60610119-60611305	20.239	0.182445	0.390314	0.467431	0.640191	0.914978	21.3035	15.8208	23.4067	20.4251
574	Chr10:60878588-60879911	30.8948	0.630936	0.354783	1.77837	0.0753429	0.483001	25.0629	20.2154	37.4507	40.8503
575	Chr10:60937891-60939107	15.7017	0.67546	0.414358	1.63014	0.103073	0.548411	13.7846	7.03145	25.2792	16.7115
576	Chr10:61110904-61112152	26.8118	0.0366916	0.371108	0.0988702	0.921241	0.985674	33.8349	19.3365	27.1518	26.924
577	Chr10:61142489-61143814	24.6584	-0.172671	0.374674	-0.460857	0.644901	0.915388	21.3035	31.6415	23.4067	22.282
578	Chr10:61157585-61158906	40.1594	-0.0606046	0.327636	-0.184975	0.853248	0.96841	40.1007	42.1887	43.0683	35.2798
579	Chr10:61680920-61682015	9.60206	-0.675714	0.432554	-1.56215	0.118253	0.575994	17.544	9.66824	6.55388	4.64207
580	Chr10:61745725-61746519	12.594	0.327369	0.422385	0.775049	0.438311	0.824441	10.0252	10.5472	11.2352	18.5683
581	Chr10:61911711-61913665	62.839	0.281768	0.285766	0.986009	0.324128	0.774046	52.6321	58.8884	68.3476	71.4879
582	Chr10:61948614-61950186	47.0037	-0.347455	0.318909	-1.08951	0.275928	0.74386	63.9104	43.9465	37.4507	42.7071
583	Chr10:62040604-62041734	20.955	0.140121	0.391969	0.357479	0.720733	0.939858	18.7972	20.2154	29.0243	15.7831
584	Chr10:62064272-62065829	46.3122	-0.506328	0.333893	-1.51644	0.129408	0.59152	41.3538	70.3145	28.088	45.4923
585	Chr10:62113616-62114852	28.8778	0.0680402	0.358666	0.189704	0.849541	0.967619	25.0629	30.7626	31.8331	27.8524
586	Chr10:62254250-62256207	50.6062	0.341926	0.307953	1.11032	0.266861	0.740541	37.5944	49.2201	58.0486	57.5617
587	Chr10:62382779-62384008	19.6273	-0.310686	0.399027	-0.778608	0.436211	0.824278	15.0378	29.8836	19.6616	13.9262
588	Chr10:62485862-62487523	78.3796	0.324177	0.267339	1.21261	0.22528	0.702511	71.4293	65.9198	83.3279	92.8415
589	Chr10:62622953-62624304	35.5729	-1.38391	0.350001	-3.95403	7.68e-05	0.00983411	55.1384	54.4937	19.6616	12.9978
590	Chr10:62706196-62707384	21.8173	-0.0726506	0.385995	-0.188216	0.850707	0.968102	25.0629	20.2154	25.2792	16.7115
591	Chr10:62800928-62802694	68.6142	-0.0212387	0.277019	-0.0766685	0.938887	0.990729	68.923	69.4355	65.5388	70.5595
592	Chr10:62891708-62893302	25.1301	-0.289944	0.371224	-0.781049	0.434773	0.823202	25.0629	31.6415	21.5342	22.282
593	Chr10:66359911-66360894	8.96331	0.658925	0.433347	1.52055	0.128374	0.59152	6.26573	4.39465	14.9803	10.2126
594	Chr10:66382529-66383813	22.2371	-0.117118	0.385089	-0.304131	0.761028	0.948649	25.0629	21.9733	15.9166	25.9956
595	Chr10:66465111-66466487	46.8375	0.332967	0.321326	1.03623	0.300095	0.761513	45.1133	36.0362	43.0683	63.1322
596	Chr10:66558620-66560237	52.8258	0.124987	0.313561	0.398606	0.690184	0.92901	53.8853	46.5833	42.1321	68.7027
597	Chr10:66747607-66748854	19.9486	-0.273701	0.391709	-0.698735	0.484718	0.847263	25.0629	20.2154	19.6616	14.8546
598	Chr10:67011007-67012219	39.2751	0.228736	0.346234	0.660639	0.508844	0.857553	30.0755	40.4308	29.9606	56.6333
599	Chr10:67374639-67375867	10.3722	0.941397	0.431156	2.18343	0.0290044	0.324415	6.26573	3.51572	16.8528	14.8546
600	Chr10:67553975-67555227	31.0012	0.443428	0.360457	1.23018	0.218629	0.695767	30.0755	20.2154	44.0046	29.7093
601	Chr10:67598737-67601202	130.1	0.291016	0.244735	1.18911	0.234398	0.708703	95.2391	135.355	127.332	162.473
602	Chr10:67642283-67644662	102.521	-1.54506	0.256127	-6.03238	1.62e-09	1.49e-06	154.137	159.965	42.1321	53.8481
603	Chr10:68471043-68472230	8.90864	-0.410885	0.433113	-0.94868	0.342784	0.78272	13.7846	8.78931	7.49015	5.57049
604	Chr10:68814745-68816373	62.9457	0.217238	0.290612	0.747521	0.454749	0.830222	51.379	63.283	76.774	60.347
605	Chr10:69559054-69560463	30.8699	-0.0789652	0.353639	-0.223293	0.823307	0.962798	31.3286	32.5204	25.2792	34.3513
606	Chr10:70699967-70701276	30.6441	0.512091	0.363933	1.4071	0.159397	0.633476	31.3286	16.6997	32.7694	41.7787
607	Chr10:70810057-70811294	32.0582	-0.0899792	0.349403	-0.257523	0.796775	0.957797	35.0881	31.6415	27.1518	34.3513
608	Chr10:70910382-70911580	7.76717	0.973102	0.433643	2.24402	0.0248314	0.305239	5.01258	0.878931	13.1078	12.0694
609	Chr10:72116647-72117954	39.4436	0.277812	0.334788	0.829813	0.406644	0.81095	28.8224	40.4308	38.387	50.1344
610	Chr10:74674291-74675648	34.7909	0.271153	0.347296	0.780756	0.434946	0.823202	36.3412	25.489	32.7694	44.5639
611	Chr10:74979845-74981491	34.3282	-0.168505	0.34586	-0.487207	0.626112	0.911314	41.3538	32.5204	36.5145	26.924
612	Chr10:75110736-75112320	59.1985	0.127003	0.313239	0.405449	0.685147	0.928203	51.379	60.6462	43.0683	81.7005
613	Chr10:75226334-75227860	64.2455	0.109953	0.28479	0.386085	0.699434	0.933143	57.6447	65.0409	72.0927	62.2038
614	Chr10:75322152-75323516	29.8234	0.430589	0.355879	1.20993	0.226305	0.703162	23.8098	24.6101	37.4507	33.4229
615	Chr10:75334939-75336140	17.8679	0.808237	0.406201	1.98974	0.0466191	0.3883	15.0378	7.03145	23.4067	25.9956
616	Chr10:75344360-75346489	37.6926	1.71007	0.351184	4.86944	1.12e-06	0.000310456	16.2909	11.4261	59.9212	63.1322
617	Chr10:75355335-75356842	45.8626	-0.44384	0.333926	-1.32915	0.183797	0.656748	55.1384	53.6148	50.5585	24.1388
618	Chr10:75383596-75384868	22.8639	0.533119	0.382244	1.39471	0.163104	0.636526	18.7972	15.8208	24.343	32.4945
619	Chr10:75398141-75399340	25.4576	0.30528	0.369943	0.825208	0.409253	0.81309	23.8098	20.2154	29.0243	28.7809
620	Chr10:75494705-75496107	56.3176	-0.0804178	0.295371	-0.27226	0.785422	0.954435	56.3916	59.7673	58.0486	51.0628
621	Chr10:75904627-75906014	45.6403	0.188746	0.322051	0.586076	0.557825	0.882209	36.3412	47.4623	41.1958	57.5617
622	Chr10:75931151-75932034	15.5056	-0.530032	0.411893	-1.28682	0.198157	0.674066	23.8098	15.8208	13.1078	9.28415
623	Chr10:75993660-75995120	26.1006	-0.188209	0.370495	-0.507993	0.611458	0.904716	31.3286	25.489	28.088	19.4967
624	Chr10:76424173-76425365	15.3158	0.00312382	0.409537	0.00762769	0.993914	0.998818	13.7846	16.6997	16.8528	13.9262
625	Chr10:76495468-76496689	18.7384	0.62052	0.397618	1.56059	0.11862	0.576271	15.0378	11.4261	25.2792	23.2104
626	Chr10:77044058-77045253	18.2057	-0.095706	0.404573	-0.23656	0.812998	0.962664	22.5566	15.8208	11.2352	23.2104
627	Chr10:77068285-77069721	62.4333	-0.0213538	0.287132	-0.0743693	0.940717	0.991417	58.8979	66.7987	66.4751	57.5617
628	Chr10:77084321-77085815	40.1029	0.0261055	0.32683	0.0798749	0.936337	0.989255	38.8475	40.4308	43.0683	38.065
629	Chr10:77471647-77472995	28.4081	0.693096	0.367584	1.88554	0.0593564	0.433063	25.0629	14.9418	33.7057	39.9218
630	Chr10:77875098-77876408	21.4407	-0.126216	0.386366	-0.326674	0.743914	0.945539	26.3161	19.3365	22.4704	17.6399
631	Chr10:77890501-77891724	21.7667	-1.57575	0.396262	-3.97654	6.99e-05	0.00953965	32.5818	39.5519	9.36268	5.57049
632	Chr10:77903927-77905128	18.9617	-1.23679	0.40163	-3.07943	0.00207396	0.0791347	30.0755	29.0047	6.55388	10.2126
633	Chr10:78036633-78038195	34.2464	0.996958	0.349774	2.85029	0.0043679	0.121166	16.2909	23.7311	48.686	48.2776
634	Chr10:78559839-78560985	16.7632	0.330268	0.407654	0.810166	0.417845	0.81649	13.7846	14.0629	25.2792	13.9262
635	Chr10:79016972-79018387	22.3767	-0.308819	0.381752	-0.808951	0.418543	0.81649	27.5692	23.7311	16.8528	21.3535
636	Chr10:79099433-79100621	13.1339	-0.0687804	0.419369	-0.164009	0.869724	0.973233	15.0378	12.305	14.9803	10.2126
637	Chr10:79144020-79146192	67.5686	0.276594	0.280104	0.98747	0.323412	0.773728	55.1384	65.0409	73.9652	76.13
638	Chr10:79166650-79168037	38.8779	0.457576	0.332142	1.37765	0.168311	0.639438	35.0881	28.1258	45.8771	46.4207
639	Chr10:79174983-79176338	29.134	0.121331	0.362473	0.334733	0.737827	0.944525	25.0629	29.8836	37.4507	24.1388
640	Chr10:79228948-79230272	32.4845	0.211456	0.346593	0.610098	0.541797	0.87567	30.0755	29.0047	35.5782	35.2798
641	Chr10:79316046-79318366	124.561	0.259783	0.234815	1.10633	0.268583	0.74123	100.252	123.929	132.014	142.047
642	Chr10:79327357-79328342	37.405	-0.729103	0.348038	-2.0949	0.0361803	0.358017	37.5944	59.7673	31.8331	20.4251
643	Chr10:79370921-79372458	61.8548	0.225028	0.290882	0.773607	0.439164	0.824857	63.9104	49.2201	71.1564	63.1322
644	Chr10:79389302-79390031	9.80187	-0.274991	0.433623	-0.63417	0.52597	0.868133	16.2909	7.03145	12.1715	3.71366
645	Chr10:79422423-79423642	23.7727	-0.303923	0.375422	-0.809548	0.4182	0.81649	25.0629	29.0047	20.5979	20.4251
646	Chr10:79446269-79448767	56.8953	0.407685	0.295333	1.38043	0.167456	0.638957	45.1133	50.099	63.6662	68.7027
647	Chr10:79459463-79460827	30.3145	-0.233253	0.366444	-0.63653	0.524431	0.868133	36.3412	30.7626	36.5145	17.6399
648	Chr10:79501975-79503274	26.8025	-0.278991	0.36755	-0.759058	0.447818	0.826883	35.0881	25.489	25.2792	21.3535
649	Chr10:79516025-79517238	57.0588	0.74661	0.303332	2.46136	0.0138412	0.234595	32.5818	47.4623	68.3476	79.8437
650	Chr10:79593001-79594372	39.5991	0.745466	0.338719	2.20084	0.0277474	0.320622	27.5692	27.2469	62.73	40.8503
651	Chr10:79604656-79604718	0	NA	NA	NA	NA	NA	0	0	0	0
652	Chr10:79611133-79612880	65.0978	-0.267017	0.282125	-0.946451	0.343919	0.783367	72.6825	71.1934	55.2398	61.2754
653	Chr10:79629867-79631454	92.5069	-0.104285	0.25505	-0.408881	0.682627	0.927784	86.4671	105.472	90.818	87.271
654	Chr10:79635185-79636597	40.0054	0.0923854	0.3279	0.281749	0.778136	0.954163	40.1007	36.9151	44.9409	38.065
655	Chr10:79688881-79690167	24.4449	-0.602283	0.37626	-1.60071	0.109441	0.56151	35.0881	27.2469	19.6616	15.7831
656	Chr10:79711239-79712549	38.8642	-0.213753	0.33397	-0.640036	0.522149	0.866638	38.8475	45.7044	41.1958	29.7093
657	Chr10:79727264-79728471	26.4901	-0.0644572	0.366103	-0.176063	0.860245	0.969202	30.0755	24.6101	25.2792	25.9956
658	Chr10:79754707-79755907	32.4523	0.27354	0.347534	0.78709	0.431229	0.821247	26.3161	30.7626	37.4507	35.2798
659	Chr10:79792020-79793364	34.0482	0.0210598	0.355146	0.0592991	0.952714	0.993702	27.5692	39.5519	44.0046	25.0672
660	Chr10:79849908-79851279	23.9225	0.165215	0.376097	0.439288	0.660453	0.920673	25.0629	19.3365	27.1518	24.1388
661	Chr10:79860848-79863273	90.6086	-0.0916321	0.256026	-0.357901	0.720417	0.939851	85.2139	101.956	86.1367	89.1278
662	Chr10:79895941-79897178	23.7205	-0.00370873	0.379282	-0.00977831	0.992198	0.998448	20.0503	27.2469	28.088	19.4967
663	Chr10:79937550-79938741	15.5137	0.270774	0.410583	0.659486	0.509583	0.858452	12.5315	14.0629	21.5342	13.9262
664	Chr10:80023584-80025276	48.4865	0.147026	0.312314	0.470764	0.637809	0.913895	50.1258	41.3097	45.8771	56.6333
665	Chr10:80040276-80041653	33.5532	-0.152264	0.345054	-0.441276	0.659013	0.919894	40.1007	31.6415	31.8331	30.6377
666	Chr10:80052346-80053560	16.2078	-0.422382	0.410202	-1.02969	0.303154	0.76196	23.8098	15.8208	15.9166	9.28415
667	Chr10:80065150-80066377	26.3139	-0.421159	0.369296	-1.14044	0.254103	0.731712	26.3161	36.0362	23.4067	19.4967
668	Chr10:80084315-80086260	59.8079	0.21113	0.289271	0.729869	0.46547	0.833452	55.1384	54.4937	65.5388	64.0606
669	Chr10:80118538-80119813	20.5247	-0.391706	0.389345	-1.00606	0.314386	0.768882	21.3035	27.2469	14.9803	18.5683
670	Chr10:80138301-80139994	66.7291	-0.0584854	0.280513	-0.208494	0.834843	0.965208	65.1636	71.1934	69.2839	61.2754
671	Chr10:80204211-80205463	19.2732	-0.256236	0.394198	-0.650018	0.51568	0.863487	25.0629	18.4575	17.7891	15.7831
672	Chr10:80217292-80218699	31.8123	0.532824	0.350628	1.51963	0.128605	0.59152	22.5566	26.3679	40.2595	38.065
673	Chr10:80260567-80262178	86.505	0.125154	0.266532	0.469565	0.638666	0.914012	76.4419	87.8931	76.774	104.911
674	Chr10:80288727-80290261	46.9515	0.173874	0.315384	0.551309	0.581422	0.890429	41.3538	45.7044	57.1124	43.6355
675	Chr10:80362797-80364030	41.2967	-0.0910934	0.325049	-0.280246	0.779289	0.954435	46.3664	39.5519	42.1321	37.1366
676	Chr10:80392103-80393445	31.6215	-0.196492	0.356874	-0.550593	0.581913	0.890706	32.5818	36.0362	36.5145	21.3535
677	Chr10:80522228-80523805	31.5243	-0.558362	0.356481	-1.56632	0.117274	0.57443	45.1133	33.3994	28.088	19.4967
678	Chr10:80567921-80569479	53.8367	-0.121168	0.299171	-0.405012	0.685469	0.928203	53.8853	58.8884	53.3673	49.206
679	Chr10:80599411-80600618	42.8167	-0.529273	0.322167	-1.64285	0.100413	0.54368	51.379	52.7358	36.5145	30.6377
680	Chr10:80615589-80615878	6.9334	-0.0952858	0.433847	-0.21963	0.826159	0.962798	5.01258	9.66824	6.55388	6.4989
681	Chr10:80629991-80631273	30.4788	0.0256005	0.356413	0.0718283	0.942739	0.991935	31.3286	29.0047	36.5145	25.0672
682	Chr10:80638694-80640314	116.239	0.043076	0.241335	0.178491	0.858337	0.969202	101.505	126.566	127.332	109.553
683	Chr10:80644845-80646568	122.122	-0.628084	0.363318	-1.72875	0.0838545	0.507573	144.112	166.997	117.034	60.347
684	Chr10:80654721-80656074	44.6678	0.114761	0.319076	0.359667	0.719096	0.939397	47.6195	37.794	49.6222	43.6355
685	Chr10:80728906-80730196	35.4859	0.564001	0.34039	1.65693	0.0975339	0.534697	28.8224	25.489	43.0683	44.5639
686	Chr10:80755238-80756437	19.2004	-0.149628	0.394642	-0.379148	0.704578	0.934622	23.8098	17.5786	15.9166	19.4967
687	Chr10:80783171-80784719	38.161	-0.120032	0.333029	-0.360424	0.71853	0.939304	35.0881	44.8255	37.4507	35.2798
688	Chr10:80812784-80813959	19.7139	0.130151	0.391595	0.332362	0.739616	0.945256	17.544	19.3365	23.4067	18.5683
689	Chr10:80827235-80829783	104.054	-0.272065	0.263202	-1.03367	0.301289	0.761922	106.517	123.05	115.161	71.4879
690	Chr10:80840468-80841659	18.1634	0.269945	0.399132	0.67633	0.498831	0.852033	17.544	14.0629	23.4067	17.6399
691	Chr10:80846563-80847919	27.2222	0.410098	0.365036	1.12345	0.261248	0.736485	22.5566	21.9733	35.5782	28.7809
692	Chr10:80895248-80896487	21.3421	-0.401343	0.397389	-1.00995	0.31252	0.768882	20.0503	30.7626	24.343	10.2126
693	Chr10:81021539-81022749	16.0281	-0.0760547	0.406929	-0.186899	0.85174	0.968258	17.544	15.8208	13.1078	17.6399
694	Chr10:81033868-81035101	19.2717	-0.650075	0.405309	-1.6039	0.108736	0.560864	26.3161	24.6101	19.6616	6.4989
695	Chr10:81063113-81064461	37.2021	-0.531689	0.341505	-1.5569	0.119494	0.578776	42.607	48.3412	35.5782	22.282
696	Chr10:81068593-81069837	28.4956	0.254015	0.360613	0.704399	0.481185	0.84557	25.0629	25.489	35.5782	27.8524
697	Chr10:81089981-81091187	25.9763	0.214623	0.367663	0.583751	0.559388	0.882507	25.0629	21.9733	28.088	28.7809
698	Chr10:81105851-81107160	36.6154	0.0292786	0.340103	0.0860874	0.931397	0.988436	28.8224	43.0676	35.5782	38.9934
699	Chr10:81510335-81511653	30.6241	0.293377	0.360564	0.81366	0.41584	0.81649	28.8224	24.6101	43.0683	25.9956
700	Chr10:81545592-81546798	11.427	0.102413	0.425379	0.240756	0.809744	0.961154	10.0252	11.4261	14.044	10.2126
701	Chr10:81590250-81591618	33.5556	-0.169467	0.345056	-0.491129	0.623335	0.909262	31.3286	40.4308	30.8969	31.5661
702	Chr10:81640610-81641887	18.2892	0.0471028	0.397285	0.118562	0.905622	0.981193	20.0503	15.8208	17.7891	19.4967
703	Chr10:81703277-81704610	11.7859	-0.511397	0.424501	-1.2047	0.228319	0.70419	16.2909	14.0629	9.36268	7.42732
704	Chr10:81816516-81817832	33.1447	0.317615	0.346059	0.917806	0.35872	0.789453	26.3161	30.7626	35.5782	39.9218
705	Chr10:82092039-82093340	23.3814	0.241024	0.380942	0.632706	0.526926	0.868676	17.544	23.7311	30.8969	21.3535
706	Chr10:82161196-82162394	14.5037	0.130326	0.41781	0.311926	0.755097	0.947086	17.544	9.66824	19.6616	11.141
707	Chr10:82225779-82227262	48.0053	0.255223	0.315091	0.809997	0.417942	0.81649	40.1007	45.7044	44.9409	61.2754
708	Chr10:82240057-82241294	15.9231	0.282965	0.407462	0.694458	0.487395	0.848912	15.0378	12.305	16.8528	19.4967
709	Chr10:82274334-82275561	17.3402	0.565565	0.405108	1.39608	0.162689	0.63607	8.77202	15.8208	24.343	20.4251
710	Chr10:82321430-82323941	80.7775	-0.0893479	0.271145	-0.329521	0.741762	0.945539	68.923	97.5613	77.7103	78.9153
711	Chr10:82822505-82823727	24.1498	-0.116138	0.373751	-0.310737	0.756001	0.947615	26.3161	24.6101	21.5342	24.1388
712	Chr10:83005977-83007488	39.1097	0.35425	0.334572	1.05882	0.289683	0.753357	38.8475	28.1258	40.2595	49.206
713	Chr10:84038857-84040247	29.7523	0.366834	0.356984	1.02759	0.304143	0.762831	26.3161	23.7311	30.8969	38.065
714	Chr10:84084592-84085825	24.5629	0.483252	0.384692	1.2562	0.209042	0.68517	26.3161	12.305	25.2792	34.3513
715	Chr10:84564457-84566074	44.3712	0.141479	0.318703	0.44392	0.6571	0.919212	37.5944	45.7044	49.6222	44.5639
716	Chr10:84590213-84591504	35.7586	-0.670148	0.347507	-1.92844	0.0538002	0.412541	45.1133	46.5833	32.7694	18.5683
717	Chr10:84647261-84648712	44.2505	0.361777	0.317855	1.13818	0.255044	0.732256	37.5944	37.794	49.6222	51.9912
718	Chr10:85001215-85003236	74.2746	0.0516191	0.272755	0.189251	0.849896	0.967626	65.1636	79.9827	73.9652	77.9868
719	Chr10:85334040-85335344	18.6905	0.0899643	0.396199	0.227069	0.82037	0.962786	16.2909	19.3365	16.8528	22.282
720	Chr10:85378837-85380220	33.5787	0.0197694	0.346515	0.0570521	0.954504	0.993712	27.5692	38.6729	35.5782	32.4945
721	Chr10:85419938-85421079	10.805	-0.443006	0.429659	-1.03106	0.302511	0.761922	15.0378	12.305	11.2352	4.64207
722	Chr10:85484136-85485552	37.5184	-0.359921	0.335691	-1.07218	0.283639	0.74877	48.8727	37.794	32.7694	30.6377
723	Chr10:86167672-86169050	74.8928	-0.141008	0.27165	-0.51908	0.603705	0.90276	75.1888	82.6195	76.774	64.989
724	Chr10:86241336-86242540	27.431	-0.410838	0.363302	-1.13084	0.258121	0.734891	35.0881	29.8836	22.4704	22.282
725	Chr10:87609047-87610516	28.6362	0.191327	0.361429	0.529362	0.596554	0.898331	21.3035	30.7626	32.7694	29.7093
726	Chr10:87663432-87664632	12.1803	0.0537249	0.42443	0.126581	0.899272	0.979932	11.2783	12.305	8.42641	16.7115
727	Chr10:87784023-87785269	15.1617	-0.628793	0.411735	-1.52718	0.126717	0.590999	22.5566	17.5786	10.299	10.2126
728	Chr10:87841420-87842664	20.4731	0.0964212	0.387672	0.248719	0.803578	0.96025	18.7972	20.2154	20.5979	22.282
729	Chr10:87965946-87967192	18.7806	-0.326983	0.396339	-0.825006	0.409368	0.81309	18.7972	24.6101	17.7891	13.9262
730	Chr10:88171148-88172832	38.382	0.724276	0.348162	2.08028	0.0374997	0.36457	21.3035	31.6415	37.4507	63.1322
731	Chr10:88193365-88194519	17.7764	0.161137	0.400614	0.402224	0.687519	0.928518	18.7972	14.0629	21.5342	16.7115
732	Chr10:88288640-88290050	36.0101	0.367064	0.339244	1.082	0.27925	0.745564	33.8349	27.2469	39.3233	43.6355
733	Chr10:88905725-88907311	36.0203	-0.436901	0.341149	-1.28068	0.200307	0.674251	41.3538	43.9465	34.6419	24.1388
734	Chr10:89207269-89208703	28.0916	0.292802	0.370616	0.790043	0.429503	0.820565	28.8224	20.2154	23.4067	39.9218
735	Chr10:90544726-90546114	26.7672	-0.0151032	0.364423	-0.0414442	0.966942	0.994678	27.5692	26.3679	25.2792	27.8524
736	Chr10:90585999-90587301	45.6497	0.206684	0.315469	0.655163	0.512362	0.860868	45.1133	38.6729	47.7497	51.0628
737	Chr10:90633023-90635262	145.817	0.244765	0.223171	1.09676	0.272747	0.742493	120.302	144.145	155.421	163.401
738	Chr10:90643539-90645543	90.7327	0.0347576	0.262062	0.132631	0.894485	0.978611	76.4419	101.956	84.2641	100.269
739	Chr10:92184379-92185569	16.0024	-0.475535	0.407302	-1.16753	0.242998	0.715328	21.3035	18.4575	13.1078	11.141
740	Chr10:92531491-92532659	11.6061	0.964392	0.429497	2.2454	0.0247425	0.305047	7.51888	3.51572	13.1078	22.282
741	Chr10:92594167-92595380	11.6972	-0.152472	0.424035	-0.359574	0.719166	0.939397	11.2783	14.0629	11.2352	10.2126
742	Chr10:92628580-92629775	17.2784	0.947541	0.407975	2.32255	0.0202035	0.277937	10.0252	8.78931	19.6616	30.6377
743	Chr10:92773234-92774439	10.8689	-0.243815	0.427035	-0.570949	0.568034	0.885142	12.5315	12.305	8.42641	10.2126
744	Chr10:92915287-92916885	18.8957	-0.69694	0.396956	-1.75571	0.0791379	0.495923	27.5692	22.8522	11.2352	13.9262
745	Chr10:93296161-93297331	13.542	0.292672	0.41932	0.697969	0.485196	0.847392	7.51888	14.9418	16.8528	14.8546
746	Chr10:93498224-93498987	10.0887	0.375461	0.431645	0.869839	0.384388	0.800952	3.75944	11.4261	12.1715	12.9978
747	Chr10:94150598-94152264	39.0147	0.126705	0.329449	0.384597	0.700536	0.933375	38.8475	35.1572	42.1321	39.9218
748	Chr10:94600889-94602080	11.2549	-0.603868	0.426955	-1.41436	0.157256	0.631864	12.5315	17.5786	6.55388	8.35573
749	Chr10:94775276-94776397	22.1456	-0.668359	0.383211	-1.7441	0.0811412	0.49982	28.8224	29.0047	14.044	16.7115
750	Chr10:94785836-94787202	37.1181	0.52889	0.33845	1.56268	0.118127	0.575994	32.5818	25.489	41.1958	49.206
751	Chr10:94878599-94880178	52.0318	-0.510362	0.305433	-1.67094	0.0947329	0.529817	60.151	65.0409	36.5145	46.4207
752	Chr10:94963810-94965068	20.8122	-0.175813	0.386581	-0.45479	0.64926	0.916111	21.3035	23.7311	17.7891	20.4251
753	Chr10:94976645-94978773	64.4604	0.355231	0.29148	1.21871	0.222953	0.700876	52.6321	58.0094	60.8574	86.3426
754	Chr10:95026142-95027440	20.4672	0.204731	0.38925	0.525963	0.598914	0.900048	21.3035	15.8208	21.5342	23.2104
755	Chr10:95353972-95355276	25.8974	1.33985	0.387784	3.45514	0.000549998	0.0391204	13.7846	8.78931	29.0243	51.9912
756	Chr10:95355305-95355361	2.02509	0.245231	0.349632	0.701396	0.483056	0.846055	2.50629	0	2.8088	2.78524
757	Chr10:95402639-95403828	24.042	-0.57271	0.37881	-1.51187	0.130568	0.591568	32.5818	28.1258	21.5342	13.9262
758	Chr10:96078906-96080356	73.8508	0.104352	0.274259	0.380485	0.703585	0.934622	67.6699	73.8302	85.2004	68.7027
759	Chr10:96183181-96185771	80.0265	0.903529	0.279864	3.22846	0.0012446	0.0591026	45.1133	59.7673	90.818	124.408
760	Chr10:98376136-98378134	82.1204	-0.10729	0.263661	-0.406924	0.684064	0.928203	83.9608	87.0141	72.0927	85.4142
761	Chr10:98568961-98570250	19.7581	-0.641615	0.40494	-1.58447	0.113087	0.569334	23.8098	28.1258	20.5979	6.4989
762	Chr10:98723494-98726103	101.225	1.03933	0.255732	4.06414	4.82e-05	0.00716422	57.6447	67.6777	125.46	154.117
763	Chr10:98922785-98924838	30.6391	1.48049	0.366274	4.04204	5.3e-05	0.00773625	15.0378	10.5472	49.6222	47.3492
764	Chr10:99477751-99479049	28.2429	-0.273388	0.374886	-0.729257	0.465844	0.833711	30.0755	33.3994	34.6419	14.8546
765	Chr10:99949225-99950426	19.3925	-0.524585	0.394211	-1.33072	0.18328	0.656589	27.5692	21.0943	14.9803	13.9262
766	Chr10:105277556-105279043	55.6409	0.331694	0.296572	1.11843	0.263384	0.739356	50.1258	46.5833	61.7937	64.0606
767	Chr10:105442447-105443725	15.3673	0.238466	0.409108	0.582894	0.559965	0.882552	13.7846	13.184	17.7891	16.7115
768	Chr10:107598331-107599955	74.9389	0.0940608	0.274457	0.342716	0.731812	0.943769	67.6699	76.467	68.3476	87.271
769	Chr10:107769483-107769880	5.02465	-0.0952661	0.424863	-0.224228	0.82258	0.962786	3.75944	7.03145	2.8088	6.4989
770	Chr10:110181538-110182953	24.2009	0.588821	0.376971	1.56198	0.118293	0.575994	15.0378	20.2154	32.7694	28.7809
771	Chr10:110315039-110316103	15.5556	0.888816	0.415641	2.13842	0.0324826	0.341313	11.2783	6.15251	27.1518	17.6399
772	Chr10:110356452-110358010	62.4969	0.085207	0.294327	0.289498	0.772201	0.953074	52.6321	67.6777	74.9015	54.7765
773	Chr10:110446279-110447903	56.1254	-0.0689258	0.306124	-0.225156	0.821858	0.962786	60.151	55.3726	42.1321	66.8459
774	Chr10:110601331-110602527	17.1114	0.123462	0.402991	0.306364	0.759327	0.948649	16.2909	15.8208	14.9803	21.3535
775	Chr10:110735219-110736470	31.4657	0.295445	0.356025	0.829844	0.406627	0.81095	31.3286	23.7311	29.0243	41.7787
776	Chr10:110814824-110816086	34.5796	-1.60122	0.355322	-4.50638	6.59e-06	0.00137191	48.8727	62.4041	14.044	12.9978
777	Chr10:110910078-110911379	39.3493	-0.190598	0.330995	-0.575834	0.564728	0.883728	36.3412	48.3412	35.5782	37.1366
778	Chr10:110942609-110943811	21.3217	0.0869193	0.388252	0.223873	0.822856	0.962786	15.0378	25.489	23.4067	21.3535
779	Chr10:111278568-111279763	16.5762	1.01808	0.415381	2.45094	0.0142482	0.23906	12.5315	4.39465	20.5979	28.7809
780	Chr10:111409359-111410559	14.4049	0.197485	0.417947	0.472514	0.63656	0.913812	16.2909	9.66824	11.2352	20.4251
781	Chr10:111837613-111838408	8.67457	-0.461976	0.433464	-1.06578	0.286524	0.75096	13.7846	8.78931	6.55388	5.57049
782	Chr10:112365349-112366544	17.6467	0.145111	0.403275	0.359832	0.718973	0.939397	11.2783	21.0943	17.7891	20.4251
783	Chr10:114687770-114688995	20.1643	0.285688	0.391163	0.730356	0.465173	0.833452	20.0503	14.9418	20.5979	25.0672
784	Chr10:114717523-114718704	7.20239	-1.14088	0.432668	-2.63686	0.00836782	0.179941	16.2909	8.78931	1.87254	1.85683
785	Chr10:114751855-114753332	33.7139	0.0705099	0.351811	0.20042	0.841152	0.965407	26.3161	38.6729	28.088	41.7787
786	Chr10:114798806-114800424	40.8461	0.209865	0.330928	0.634169	0.52597	0.868133	41.3538	33.3994	51.4948	37.1366
787	Chr10:114820795-114822764	44.0319	0.541136	0.330878	1.63545	0.101954	0.546348	42.607	26.3679	45.8771	61.2754
788	Chr10:116017493-116019411	64.0466	0.409353	0.28901	1.4164	0.15666	0.631571	61.4041	46.5833	69.2839	78.9153
789	Chr10:116386733-116388006	22.9817	-0.0594187	0.37794	-0.157218	0.875073	0.974099	22.5566	24.6101	23.4067	21.3535
790	Chr10:116499979-116501383	42.2665	0.284355	0.329693	0.862483	0.388422	0.802705	30.0755	43.9465	41.1958	53.8481
791	Chr10:116660783-116662339	54.7353	0.287389	0.298564	0.96257	0.335763	0.779716	47.6195	49.2201	57.1124	64.989
792	Chr10:116813094-116814580	40.4374	0.487969	0.333317	1.46398	0.143199	0.611114	37.5944	27.2469	42.1321	54.7765
793	Chr10:117146578-117148463	77.6624	0.388513	0.27127	1.4322	0.152086	0.627144	61.4041	70.3145	80.5191	98.412
794	Chr10:117229667-117230747	26.8056	0.537291	0.366967	1.46414	0.143156	0.611114	22.5566	18.4575	34.6419	31.5661
795	Chr10:117281989-117283315	27.7395	0.359128	0.36365	0.987564	0.323366	0.773728	23.8098	22.8522	28.088	36.2082
796	Chr10:117388920-117390117	22.309	0.729413	0.385621	1.89153	0.0585541	0.431228	13.7846	15.8208	25.2792	34.3513
797	Chr10:117577955-117579139	17.8505	0.383787	0.404129	0.949665	0.342283	0.78272	10.0252	18.4575	25.2792	17.6399
798	Chr10:118676293-118678577	78.2751	0.225566	0.268005	0.841649	0.399985	0.808272	65.1636	77.3459	82.3916	88.1994
799	Chr10:119590541-119591839	14.5905	-0.310692	0.413727	-0.75096	0.452677	0.829912	20.0503	14.0629	13.1078	11.141
800	Chr10:119663769-119664877	20.2854	-0.0428528	0.395206	-0.108432	0.913653	0.984135	13.7846	27.2469	22.4704	17.6399
801	Chr10:119959468-119960647	20.0993	0.733384	0.404033	1.81516	0.0694995	0.466157	8.77202	16.6997	17.7891	37.1366
802	Chr10:120415663-120417242	42.6493	-0.0186317	0.324183	-0.0574726	0.954169	0.993702	40.1007	45.7044	36.5145	48.2776
803	Chr10:120801408-120802759	28.5814	-0.110772	0.364386	-0.303996	0.761131	0.948649	33.8349	26.3679	32.7694	21.3535
804	Chr10:120913143-120914382	27.1906	0.425225	0.370708	1.14706	0.251357	0.726568	16.2909	27.2469	28.088	37.1366
805	Chr10:121005635-121006847	12.8608	-0.448124	0.420923	-1.06462	0.287047	0.75096	12.5315	19.3365	9.36268	10.2126
806	Chr10:121022982-121024365	33.1605	-0.0718873	0.352787	-0.20377	0.838534	0.965208	31.3286	36.9151	40.2595	24.1388
807	Chr10:121062511-121064392	48.7669	0.153604	0.308401	0.498066	0.618438	0.906258	47.6195	43.9465	53.3673	50.1344
808	Chr10:121176282-121177804	33.6889	-0.290311	0.345358	-0.84061	0.400566	0.808516	42.607	33.3994	30.8969	27.8524
809	Chr10:121533273-121534716	39.3196	-0.047016	0.330553	-0.142234	0.886895	0.977668	35.0881	44.8255	36.5145	40.8503
810	Chr10:122115413-122116689	17.3321	-0.1672	0.40066	-0.417313	0.67645	0.925923	20.0503	17.5786	15.9166	15.7831
811	Chr10:122199440-122200652	10.0751	-0.360352	0.429964	-0.838097	0.401976	0.809411	11.2783	13.184	6.55388	9.28415
812	Chr10:122421903-122424192	95.3919	0.526486	0.261133	2.01616	0.043783	0.380625	86.4671	66.7987	100.181	128.121
813	Chr10:122633569-122634170	16.7104	0.167616	0.403502	0.415402	0.677847	0.925976	13.7846	16.6997	17.7891	18.5683
814	Chr10:126342271-126343528	17.5719	0.623043	0.409366	1.52197	0.128016	0.59152	17.544	7.03145	26.2155	19.4967
815	Chr10:126364642-126366246	38.5215	-0.0712114	0.331521	-0.214802	0.829921	0.963533	42.607	36.9151	34.6419	39.9218
816	Chr10:126398624-126399720	12.69	-0.359468	0.423079	-0.849648	0.395521	0.806746	10.0252	20.2154	11.2352	9.28415
817	Chr10:126408475-126409666	21.5001	-0.24669	0.388365	-0.635203	0.525296	0.868133	18.7972	29.0047	15.9166	22.282
818	Chr10:126414817-126416436	40.3165	0.152062	0.339212	0.448281	0.653951	0.918259	37.5944	37.794	55.2398	30.6377
819	Chr10:126467074-126468381	16.516	0.487993	0.410689	1.18823	0.234743	0.708703	16.2909	8.78931	15.9166	25.0672
820	Chr10:126478452-126479766	32.3856	-0.0540466	0.349139	-0.1548	0.876979	0.974634	30.0755	36.0362	35.5782	27.8524
821	Chr10:126499892-126501454	54.4229	0.458199	0.299573	1.52951	0.126139	0.590729	45.1133	43.9465	60.8574	67.7743
822	Chr10:126557698-126559020	39.0277	-0.544085	0.336478	-1.617	0.105879	0.557179	40.1007	55.3726	34.6419	25.9956
823	Chr10:126647946-126649267	33.2312	-0.293915	0.346856	-0.847371	0.396788	0.807306	42.607	32.5204	28.088	29.7093
824	Chr10:126725311-126726671	34.0386	-0.00160003	0.342285	-0.00467456	0.99627	0.998818	33.8349	34.2783	31.8331	36.2082
825	Chr10:126726969-126728526	54.9371	0.33698	0.298773	1.12788	0.25937	0.735291	43.8601	50.978	59.9212	64.989
826	Chr10:126747982-126749268	18.1604	0.530801	0.39872	1.33126	0.183103	0.656237	13.7846	13.184	21.5342	24.1388
827	Chr10:126816900-126818227	30.9096	0.133358	0.361416	0.368987	0.712137	0.93567	33.8349	24.6101	24.343	40.8503
828	Chr10:126958876-126960070	17.1799	0.160293	0.409805	0.391144	0.695691	0.931093	13.7846	17.5786	26.2155	11.141
829	Chr10:127027814-127029034	17.8356	0.780497	0.403591	1.93388	0.053128	0.410846	8.77202	13.184	21.5342	27.8524
830	Chr10:127113613-127114839	15.9831	0.00784221	0.412901	0.018993	0.984847	0.998039	22.5566	9.66824	16.8528	14.8546
831	Chr10:127343703-127344912	20.3258	-0.167795	0.389132	-0.431202	0.666321	0.922157	23.8098	20.2154	16.8528	20.4251
832	Chr10:127472168-127473781	64.1874	0.636585	0.288709	2.20494	0.0274586	0.319344	46.3664	50.099	71.1564	89.1278
833	Chr10:127494939-127496681	85.1772	0.118223	0.260465	0.453893	0.649906	0.916541	82.7076	79.9827	82.3916	95.6267
834	Chr10:127519589-127521099	59.3109	-0.205969	0.291869	-0.705689	0.480381	0.845544	61.4041	66.7987	49.6222	59.4185
835	Chr10:127630628-127632299	24.6641	-0.856411	0.377424	-2.2691	0.0232625	0.30014	30.0755	37.794	17.7891	12.9978
836	Chr10:127668579-127670183	51.9648	0.535578	0.306177	1.74924	0.080249	0.499779	45.1133	36.9151	58.9849	66.8459
837	Chr10:127699644-127700357	8.46039	-0.776216	0.4342	-1.78769	0.0738261	0.479236	17.544	7.91038	3.74507	4.64207
838	Chr10:127707076-127708207	15.8013	-0.154829	0.415974	-0.372209	0.709738	0.935303	17.544	16.6997	21.5342	7.42732
839	Chr10:127739735-127741188	37.8763	0.713598	0.343967	2.07461	0.0380225	0.365384	32.5818	21.0943	41.1958	56.6333
840	Chr10:127759045-127760493	47.7885	0.384365	0.318002	1.20869	0.226783	0.703162	36.3412	43.9465	45.8771	64.989
841	Chr10:127813613-127814597	18.5521	-0.566182	0.396642	-1.42744	0.153454	0.628467	22.5566	24.6101	14.044	12.9978
842	Chr10:127894987-127896265	23.1803	-0.239397	0.379749	-0.63041	0.528426	0.870196	28.8224	22.8522	23.4067	17.6399
843	Chr10:127910718-127912062	24.8615	0.984276	0.377682	2.6061	0.00915803	0.188181	16.2909	12.305	34.6419	36.2082
844	Chr10:127930515-127931739	37.099	0.348814	0.338488	1.03051	0.302773	0.761922	36.3412	27.2469	38.387	46.4207
845	Chr10:127962486-127963499	16.0089	-0.152464	0.418192	-0.36458	0.715425	0.937117	26.3161	8.78931	17.7891	11.141
846	Chr10:127984043-127986743	112.837	-0.0178597	0.240349	-0.0743074	0.940766	0.991417	102.758	123.929	108.607	116.052
847	Chr10:128062843-128064317	88.429	0.39073	0.258495	1.51156	0.130646	0.591568	73.9356	76.467	109.543	93.7699
848	Chr10:128132651-128133639	25.9823	-0.352795	0.368881	-0.956393	0.338874	0.781409	27.5692	32.5204	24.343	19.4967
849	Chr10:128141344-128142584	31.5576	-0.0366072	0.355175	-0.103068	0.917909	0.985447	25.0629	38.6729	34.6419	27.8524
850	Chr10:128184475-128185864	45.7976	0.367892	0.317956	1.15705	0.247251	0.722055	40.1007	37.794	45.8771	59.4185
851	Chr10:128241468-128242497	21.7811	0.0125944	0.384026	0.0327958	0.973837	0.995522	21.3035	21.9733	25.2792	18.5683
852	Chr10:128258232-128259693	45.1576	-0.394703	0.317305	-1.24392	0.213528	0.691639	57.6447	47.4623	38.387	37.1366
853	Chr10:128346120-128347444	28.0274	-0.541085	0.366483	-1.47643	0.13983	0.606377	28.8224	40.4308	17.7891	25.0672
854	Chr10:128359738-128361294	50.2092	0.0340758	0.305714	0.111463	0.911249	0.983048	52.6321	46.5833	50.5585	51.0628
855	Chr11:3031509-3032760	42.804	0.201191	0.32612	0.616923	0.537286	0.874518	46.3664	32.5204	49.6222	42.7071
856	Chr11:3032972-3034211	47.9276	0.0276427	0.311329	0.0887891	0.929249	0.988018	46.3664	48.3412	53.3673	43.6355
857	Chr11:3042652-3043878	90.4956	-0.0547725	0.268971	-0.203637	0.838637	0.965208	112.783	72.9512	92.6906	83.5573
858	Chr11:3045609-3046819	94.2938	0.154906	0.372537	0.415814	0.677546	0.925923	117.796	58.0094	99.2444	102.126
859	Chr11:3084226-3085681	107.431	-0.16976	0.270542	-0.627483	0.530343	0.871485	146.618	83.4984	110.48	89.1278
860	Chr11:3092545-3094642	233.172	0.279992	0.321182	0.871755	0.383342	0.800204	259.401	153.813	279.944	239.531
861	Chr11:3101689-3103420	82.296	-0.0896341	0.277813	-0.322642	0.746967	0.945539	95.2391	75.588	62.73	95.6267
862	Chr11:3165599-3167224	68.5216	-0.33546	0.285157	-1.17641	0.239432	0.711994	67.6699	87.0141	67.4113	51.9912
863	Chr11:3188665-3190793	101.673	-0.113876	0.246286	-0.462373	0.643814	0.915388	100.252	111.624	92.6906	102.126
864	Chr11:3231717-3232948	31.5928	-0.264363	0.355879	-0.742845	0.457575	0.831857	32.5818	37.794	34.6419	21.3535
865	Chr11:3308440-3309635	30.0919	-0.279416	0.361983	-0.771904	0.440171	0.825394	25.0629	42.1887	23.4067	29.7093
866	Chr11:3435050-3436395	31.9746	-0.571416	0.350054	-1.63237	0.102602	0.54792	36.3412	43.0676	25.2792	23.2104
867	Chr11:3548032-3549979	105.873	-0.473504	0.242886	-1.94949	0.0512371	0.402639	119.049	130.082	88.9455	85.4142
868	Chr11:3794349-3795560	18.1503	0.680561	0.401873	1.69347	0.0903652	0.520428	10.0252	14.0629	28.088	20.4251
869	Chr11:3831399-3832658	16.8738	-0.222713	0.405483	-0.549254	0.582831	0.890948	20.0503	17.5786	18.7254	11.141
870	Chr11:3863223-3864793	51.8003	0.224897	0.307024	0.732505	0.46386	0.833452	51.379	43.0676	49.6222	63.1322
871	Chr11:3883087-3884326	26.0099	-1.28188	0.376194	-3.4075	0.000655619	0.0413338	37.5944	42.1887	14.044	10.2126
872	Chr11:3996178-3997624	39.0591	-0.289992	0.337109	-0.860233	0.38966	0.802861	53.8853	34.2783	35.5782	32.4945
873	Chr11:4059901-4061099	21.2255	0.044379	0.393955	0.11265	0.910308	0.982566	28.8224	13.184	22.4704	20.4251
874	Chr11:4086061-4087592	37.6837	-1.25583	0.340225	-3.69118	0.000223216	0.02064	58.8979	53.6148	18.7254	19.4967
875	Chr11:4166273-4167465	27.0727	-0.122788	0.372499	-0.329631	0.741678	0.945539	26.3161	30.7626	17.7891	33.4229
876	Chr11:4340383-4341579	19.2725	0.182901	0.392857	0.465566	0.641526	0.915023	17.544	17.5786	22.4704	19.4967
877	Chr11:4493962-4495258	26.6218	-0.231437	0.366229	-0.631946	0.527422	0.869323	32.5818	26.3679	22.4704	25.0672
878	Chr11:4603609-4604816	26.8708	0.0376109	0.379443	0.0991212	0.921042	0.985674	37.5944	15.8208	26.2155	27.8524
879	Chr11:4706540-4707252	24.2615	0.329621	0.376224	0.87613	0.380959	0.798173	20.0503	21.0943	23.4067	32.4945
880	Chr11:4748587-4749684	19.2454	-0.111425	0.393458	-0.283195	0.777027	0.95375	21.3035	19.3365	15.9166	20.4251
881	Chr11:4765292-4766498	10.5957	-0.340712	0.429095	-0.794025	0.427181	0.819124	15.0378	10.5472	10.299	6.4989
882	Chr11:4794639-4796080	32.268	-0.410885	0.350485	-1.17233	0.241063	0.713308	36.3412	39.5519	30.8969	22.282
883	Chr11:4846537-4848630	36.5594	0.0146342	0.344072	0.0425324	0.966074	0.994678	33.8349	38.6729	45.8771	27.8524
884	Chr11:4964598-4965781	23.2794	-0.518403	0.378549	-1.36945	0.170859	0.641935	31.3286	26.3679	16.8528	18.5683
885	Chr11:4997967-5000410	132.865	-0.0860157	0.227345	-0.378348	0.705172	0.934622	135.34	138.871	119.842	137.405
886	Chr11:5161251-5162453	15.0339	-0.362547	0.412917	-0.878014	0.379936	0.79787	20.0503	15.8208	14.9803	9.28415
887	Chr11:5344074-5345466	41.9434	-0.715583	0.326882	-2.18912	0.0285882	0.32281	50.1258	58.0094	26.2155	33.4229
888	Chr11:5385137-5386261	14.5265	0.117855	0.412768	0.285523	0.775244	0.953074	15.0378	12.305	14.9803	15.7831
889	Chr11:5420458-5421673	40.7726	-0.25546	0.329979	-0.77417	0.43883	0.824627	46.3664	43.9465	43.0683	29.7093
890	Chr11:5606934-5608164	26.6252	-0.444011	0.367235	-1.20907	0.226638	0.703162	27.5692	36.0362	22.4704	20.4251
891	Chr11:5661461-5662911	35.1299	-0.262043	0.340595	-0.769369	0.441674	0.825676	37.5944	40.4308	34.6419	27.8524
892	Chr11:5687671-5689240	47.4143	-0.45673	0.311144	-1.4679	0.14213	0.610216	55.1384	57.1305	39.3233	38.065
893	Chr11:5777577-5779099	32.2633	-0.0417256	0.351014	-0.118872	0.905377	0.981193	31.3286	34.2783	37.4507	25.9956
894	Chr11:5854996-5856192	14.6957	0.137219	0.412933	0.332302	0.739661	0.945256	11.2783	15.8208	14.044	17.6399
895	Chr11:6053824-6055091	28.3577	-0.87992	0.364289	-2.41544	0.0157161	0.250108	37.5944	40.4308	14.9803	20.4251
896	Chr11:6099463-6100977	36.4677	-0.18732	0.336878	-0.556047	0.578179	0.889226	40.1007	38.6729	29.9606	37.1366
897	Chr11:6167030-6168570	31.3404	-0.477601	0.360208	-1.3259	0.184871	0.658549	42.607	33.3994	17.7891	31.5661
898	Chr11:6174162-6175361	15.9268	-0.645329	0.408763	-1.57874	0.114397	0.570391	23.8098	18.4575	10.299	11.141
899	Chr11:6191205-6192709	47.8686	-0.646196	0.319031	-2.0255	0.0428165	0.380207	56.3916	64.1619	43.0683	27.8524
900	Chr11:6288567-6290142	45.5852	-0.553978	0.328213	-1.68786	0.0914381	0.523348	43.8601	67.6777	29.0243	41.7787
901	Chr11:6314914-6317222	184.234	-0.0669802	0.207234	-0.323211	0.746535	0.945539	176.694	200.396	176.018	183.826
902	Chr11:6343699-6345124	61.1235	-0.133338	0.291303	-0.457728	0.647148	0.915887	66.4167	62.4041	65.5388	50.1344
903	Chr11:6375450-6376918	40.6005	-0.256605	0.32638	-0.786214	0.431742	0.821247	41.3538	48.3412	34.6419	38.065
904	Chr11:6427674-6429286	94.5695	0.00870605	0.253518	0.0343409	0.972605	0.995522	85.2139	102.835	99.2444	90.9847
905	Chr11:6445789-6447673	67.2298	-0.301013	0.279865	-1.07556	0.282122	0.748429	80.2013	70.3145	58.9849	59.4185
906	Chr11:6525299-6526903	70.8029	-0.427929	0.277677	-1.5411	0.123292	0.584568	75.1888	89.6509	55.2398	63.1322
907	Chr11:7322821-7324553	49.7139	0.0993829	0.31441	0.316094	0.751931	0.946155	48.8727	46.5833	41.1958	62.2038
908	Chr11:8474541-8475916	61.0282	0.132242	0.28959	0.456653	0.64792	0.915894	53.8853	61.5251	69.2839	59.4185
909	Chr11:8534079-8535484	40.9647	-0.25012	0.326202	-0.766764	0.443222	0.825676	40.1007	50.099	37.4507	36.2082
910	Chr11:8563640-8564758	31.0819	-0.436999	0.35258	-1.23943	0.215185	0.692219	38.8475	35.1572	22.4704	27.8524
911	Chr11:8910393-8911699	31.1006	-0.683694	0.359574	-1.9014	0.0572494	0.427765	40.1007	40.4308	28.088	15.7831
912	Chr11:9015774-9017087	39.1853	-0.428898	0.331384	-1.29426	0.195575	0.672039	47.6195	44.8255	28.088	36.2082
913	Chr11:10997955-10999139	21.4495	-0.00468539	0.383951	-0.0122031	0.990264	0.998448	20.0503	22.8522	22.4704	20.4251
914	Chr11:11361279-11362808	35.6525	-0.392455	0.340498	-1.15259	0.249079	0.723755	36.3412	46.5833	31.8331	27.8524
915	Chr11:11585160-11586351	22.4759	-1.0876	0.386736	-2.81225	0.00491968	0.129562	37.5944	29.0047	11.2352	12.0694
916	Chr11:11708159-11710108	117.21	0.361448	0.242139	1.49273	0.135509	0.599271	97.7454	104.593	116.097	150.403
917	Chr11:11722279-11722951	25.5913	0.131132	0.369128	0.355248	0.722404	0.940301	26.3161	21.9733	27.1518	26.924
918	Chr11:12364207-12365510	50.1313	-0.119457	0.311212	-0.383846	0.701092	0.933732	58.8979	46.5833	41.1958	53.8481
919	Chr11:12710955-12712225	22.8207	0.951552	0.389438	2.4434	0.0145497	0.240343	13.7846	12.305	24.343	40.8503
920	Chr11:16407249-16408594	28.2505	-0.0898359	0.36142	-0.248563	0.803698	0.96025	32.5818	26.3679	24.343	29.7093
921	Chr11:17058825-17059609	17.3051	-0.48698	0.405153	-1.20196	0.229377	0.70419	23.8098	19.3365	9.36268	16.7115
922	Chr11:17110856-17112369	40.1404	-0.244641	0.330089	-0.741137	0.45861	0.831857	50.1258	38.6729	32.7694	38.9934
923	Chr11:17156982-17158365	29.9827	-0.394645	0.357433	-1.10411	0.269545	0.741643	38.8475	31.6415	28.088	21.3535
924	Chr11:17852948-17854419	32.7699	-0.240995	0.347768	-0.692976	0.488325	0.849532	36.3412	36.0362	25.2792	33.4229
925	Chr11:18919953-18921223	25.2308	0.0614022	0.375503	0.16352	0.870109	0.973233	18.7972	29.8836	29.9606	22.282
926	Chr11:19749037-19750233	21.7415	0.350494	0.38669	0.906396	0.364726	0.79208	22.5566	14.0629	25.2792	25.0672
927	Chr11:19750288-19750312	0	NA	NA	NA	NA	NA	0	0	0	0
928	Chr11:19819778-19820974	29.6025	0.361664	0.377863	0.957129	0.338502	0.781047	27.5692	21.9733	19.6616	49.206
929	Chr11:19824939-19825955	28.1763	-0.315346	0.359803	-0.876438	0.380792	0.798173	32.5818	31.6415	24.343	24.1388
930	Chr11:19886560-19887483	22.0962	0.423298	0.383554	1.10362	0.269757	0.741643	15.0378	20.2154	25.2792	27.8524
931	Chr11:20012107-20013868	47.7178	-0.469188	0.312319	-1.50227	0.133027	0.595804	56.3916	57.1305	34.6419	42.7071
932	Chr11:20038287-20039652	37.9951	-0.889502	0.346898	-2.56416	0.0103426	0.198778	37.5944	65.9198	22.4704	25.9956
933	Chr11:20040129-20040684	14.263	-1.33809	0.420088	-3.18527	0.0014462	0.0642205	21.3035	25.489	5.61761	4.64207
934	Chr11:20100227-20102393	64.6198	-0.246258	0.285363	-0.862962	0.388158	0.802705	75.1888	66.7987	52.431	64.0606
935	Chr11:20148472-20150052	49.1089	-0.58125	0.308916	-1.88158	0.0598936	0.433421	57.6447	63.283	36.5145	38.9934
936	Chr11:20232018-20233701	38.8171	0.105791	0.330028	0.320551	0.74855	0.946015	36.3412	37.794	43.0683	38.065
937	Chr11:20295997-20297263	25.4497	-0.858345	0.373507	-2.29807	0.0215577	0.285674	37.5944	32.5204	14.044	17.6399
938	Chr11:20377193-20378508	25.6935	-0.409833	0.369406	-1.10944	0.267241	0.740541	30.0755	30.7626	18.7254	23.2104
939	Chr11:20442229-20443966	41.1004	-0.637552	0.332974	-1.91472	0.0555281	0.419333	50.1258	53.6148	37.4507	23.2104
940	Chr11:20531489-20532821	30.4721	-0.734607	0.357474	-2.055	0.0398794	0.372711	35.0881	44.8255	23.4067	18.5683
[truncated: 7,389 more rows]

## Sheet: H3K27ac-significant-changes
Chromosome	start	end
[truncated: 161 more rows]

[truncated: 2 more sheets: H3K4me1-peaks-statistics, H3K4me1-significant-changes]
