# Supplementary material for: A plug and play microfluidic platform for standardized sensitive low-input chromatin immunoprecipitation
Source: HighWire-hosted journal article supplement (doi:10.1101/gr.260745.120), 2021-03-11
Supplement: Supplemental_Table_S2.xlsx [file Supplemental_Table_S2.xlsx]

## Sheet: DESeq2_H3K4me3-merged_adjpval
Table S2 : Promoter-associated H3K4me3 as present in 2C-like cells and the remainder of the mESC population, together with statisitcal analysis for calling differential loci in the three marker-negative (neg) versus the three marker positive (pos) mESC populations (DE-Seq2, FDR-adjusted p-value (padj) <0.05). None of the loci is significantly different
Dirks et al.: A plug and play microfluidic platform for standardized sensitive low-input Chromatin Immunoprecipitation; Genome Research 2021
Peak nr	Row.names	baseMean	log2FoldChange	lfcSE	stat	pvalue	padj	Hex.neg_raw	Hex.pos_raw	MERVL.neg_raw	MERVL.pos_raw	Zscan4d.neg_raw	Zscan4d.pos_raw	Hex.neg_Nor	Hex.pos_Nor	MERVL.neg_Nor	MERVL.pos_Nor	Zscan4d.neg_Nor	Zscan4d.pos_Nor
1	Chr1:10027708-10028708	64.5135	-0.114463	0.240741	-0.475463	0.634457	0.999637	44	36	75	58	131	84	69.605	58.9106	70.7697	75.1718	60.4522	52.1715
2	Chr1:10027800-10028800	64.1493	-0.0596413	0.249619	-0.238929	0.811161	0.999637	41	35	77	63	126	81	64.8592	57.2742	72.6569	81.6522	58.1449	50.3082
3	Chr1:100317202-100318202	7.00518	0.699292	0.702928	0.994828	0.31982	0.999637	4	4	5	5	12	20	6.32773	6.54563	4.71798	6.48033	5.53761	12.4218
4	Chr1:101668843-101669843	9.14589	-0.0176098	0.64723	-0.027208	0.978294	0.999637	3	4	10	5	29	23	4.74579	6.54563	9.43597	6.48033	13.3826	14.2851
5	Chr1:10222251-10223251	37.366	0.0494831	0.295474	0.16747	0.867	0.999637	28	30	35	28	70	47	44.2941	49.0922	33.0259	36.2898	32.3027	29.1912
6	Chr1:106664607-106665607	19.8448	-0.358113	0.413291	-0.866492	0.386221	0.999637	11	13	22	8	61	34	17.4012	21.2733	20.7591	10.3685	28.1495	21.117
7	Chr1:10709526-10710526	8.80228	0.724125	0.670739	1.07959	0.280323	0.999637	2	8	5	5	24	23	3.16386	13.0913	4.71798	6.48033	11.0752	14.2851
8	Chr1:107252787-107253787	41.832	-0.0350521	0.276213	-0.126902	0.899018	0.999637	31	18	40	33	93	79	49.0399	29.4553	37.7439	42.7702	42.9165	49.0661
9	Chr1:107555085-107556085	2.73773	0.377245	1.74888	0.215707	0.829216	0.999637	0	2	1	0	13	10	0	3.27281	0.943597	0	5.99908	6.21089
10	Chr1:107559939-107560939	51.5026	0.0646764	0.270018	0.239527	0.810697	0.999637	36	27	53	56	96	66	56.9495	44.183	50.0106	72.5797	44.3009	40.9919
11	Chr1:107676801-107677801	47.5947	0.202082	0.254977	0.792553	0.428039	0.999637	31	32	47	40	87	77	49.0399	52.365	44.349	51.8426	40.1477	47.8239
12	Chr1:107886484-107887484	41.7535	-0.149623	0.265837	-0.562836	0.573547	0.999637	28	22	46	33	96	64	44.2941	36.0009	43.4054	42.7702	44.3009	39.7497
13	Chr1:108067830-108068830	24.417	-0.0932353	0.353521	-0.263733	0.791986	0.999637	17	15	29	21	46	31	26.8928	24.5461	27.3643	27.2174	21.2275	19.2538
14	Chr1:108610351-108611351	39.4848	0.0510256	0.274782	0.185695	0.852684	0.999637	24	26	38	34	89	57	37.9664	42.5466	35.8567	44.0662	41.0706	35.4021
15	Chr1:108655819-108656819	48.7397	-0.375838	0.265453	-1.41584	0.156824	0.999637	35	18	67	40	105	71	55.3676	29.4553	63.221	51.8426	48.4541	44.0974
16	Chr1:108692805-108693805	47.9238	-0.30351	0.261944	-1.15868	0.246586	0.999637	38	26	56	38	100	59	60.1134	42.5466	52.8414	49.2505	46.1467	36.6443
17	Chr1:108757251-108758251	9.70169	0.137065	0.617983	0.221794	0.824474	0.999637	3	6	13	5	23	23	4.74579	9.81844	12.2668	6.48033	10.6138	14.2851
18	Chr1:108830527-108831527	7.86335	0.664442	0.724567	0.91702	0.359132	0.999637	2	7	4	3	23	23	3.16386	11.4548	3.77439	3.8882	10.6138	14.2851
19	Chr1:108877062-108878062	5.11263	0.205059	0.820329	0.249972	0.802609	0.999637	1	6	6	3	13	6	1.58193	9.81844	5.66158	3.8882	5.99908	3.72654
20	Chr1:108948414-108949414	4.82628	0.650136	0.81337	0.799312	0.42411	0.999637	2	4	3	3	11	12	3.16386	6.54563	2.83079	3.8882	5.07614	7.45307
21	Chr1:108979583-108980583	6.13577	-0.223659	0.749734	-0.298318	0.76546	0.999637	3	5	5	3	21	9	4.74579	8.18203	4.71798	3.8882	9.69082	5.58981
22	Chr1:109174438-109175438	3.4325	0.912901	0.989998	0.922124	0.356464	0.999637	0	5	2	3	9	4	0	8.18203	1.88719	3.8882	4.15321	2.48436
23	Chr1:109174448-109175448	3.4325	0.912901	0.989998	0.922124	0.356464	0.999637	0	5	2	3	9	4	0	8.18203	1.88719	3.8882	4.15321	2.48436
24	Chr1:109258007-109259007	6.73593	0.616827	0.721804	0.854563	0.392793	0.999637	3	6	3	5	17	14	4.74579	9.81844	2.83079	6.48033	7.84495	8.69525
25	Chr1:109295733-109296733	8.6318	0.776041	0.673709	1.15189	0.249365	0.999637	4	10	3	5	20	17	6.32773	16.3641	2.83079	6.48033	9.22935	10.5585
26	Chr1:109407501-109408501	4.95105	0.204509	0.85088	0.24035	0.810059	0.999637	5	4	2	1	10	12	7.90966	6.54563	1.88719	1.29607	4.61467	7.45307
27	Chr1:109425081-109426081	4.59838	0.933321	0.913292	1.02193	0.306813	0.999637	0	6	2	2	14	11	0	9.81844	1.88719	2.59213	6.46054	6.83198
28	Chr1:109486084-109487084	11.0194	0.219778	0.635871	0.345632	0.729619	0.999637	12	10	4	4	19	21	18.9832	16.3641	3.77439	5.18426	8.76788	13.0429
29	Chr1:10983047-10984047	34.0374	0.0535923	0.296928	0.180489	0.856769	0.999637	25	16	35	29	65	61	39.5483	26.1825	33.0259	37.5859	29.9954	37.8865
30	Chr1:111878405-111879405	23.3015	0.0534873	0.367664	0.145479	0.884333	0.999637	14	12	30	15	43	49	22.147	19.6369	28.3079	19.441	19.8431	30.4334
31	Chr1:112873449-112874449	5.55145	2.19024	0.842368	2.6001	0.00931975	0.999637	1	6	2	6	5	16	1.58193	9.81844	1.88719	7.7764	2.30734	9.93743
32	Chr1:113760986-113761986	26.8023	0.156116	0.326597	0.478007	0.632645	0.999637	15	15	27	24	58	47	23.729	24.5461	25.4771	31.1056	26.7651	29.1912
33	Chr1:11403687-11404687	47.8874	-0.155461	0.254348	-0.611215	0.541057	0.999637	29	30	57	36	109	67	45.876	49.0922	53.785	46.6584	50.3	41.613
34	Chr1:117580834-117581834	5.77244	0.377767	0.778358	0.485339	0.627436	0.999637	4	2	3	4	14	17	6.32773	3.27281	2.83079	5.18426	6.46054	10.5585
35	Chr1:120207209-120208209	54.2739	-0.229967	0.26874	-0.855724	0.39215	0.999637	33	25	83	46	100	78	52.2037	40.9102	78.3185	59.619	46.1467	48.445
36	Chr1:120217917-120218917	42.9227	0.0615808	0.278856	0.220834	0.825222	0.999637	28	23	44	46	86	56	44.2941	37.6374	41.5183	59.619	39.6862	34.781
37	Chr1:120285136-120286136	61.1705	-0.144248	0.247432	-0.582982	0.559906	0.999637	37	31	80	56	126	83	58.5315	50.7286	75.4877	72.5797	58.1449	51.5504
38	Chr1:120354824-120355824	13.7257	0.00813651	0.518394	0.0156956	0.987477	0.999637	7	4	19	15	27	24	11.0735	6.54563	17.9283	19.441	12.4596	14.9061
39	Chr1:120373104-120374104	9.28694	1.05566	0.689037	1.53209	0.125501	0.999637	1	10	9	3	16	29	1.58193	16.3641	8.49237	3.8882	7.38348	18.0116
40	Chr1:120524023-120525023	57.5772	-0.218674	0.240361	-0.909771	0.362944	0.999637	37	36	72	39	127	82	58.5315	58.9106	67.939	50.5466	58.6064	50.9293
41	Chr1:120949696-120950696	50.228	-0.441213	0.264743	-1.66657	0.0955996	0.999637	37	23	72	40	103	61	58.5315	37.6374	67.939	51.8426	47.5311	37.8865
42	Chr1:121318325-121319325	44.4173	-0.120798	0.277692	-0.435006	0.663558	0.999637	21	22	59	43	104	61	33.2206	36.0009	55.6722	55.7308	47.9926	37.8865
43	Chr1:121400871-121401871	43.6665	-0.248532	0.263801	-0.94212	0.346131	0.999637	26	25	55	28	106	69	41.1302	40.9102	51.8978	36.2898	48.9155	42.8552
44	Chr1:121545077-121546077	35.4477	-0.000546395	0.296451	-0.00184312	0.998529	0.999754	26	25	40	26	61	50	41.1302	40.9102	37.7439	33.6977	28.1495	31.0545
45	Chr1:121733690-121734690	36.766	-0.0424695	0.29984	-0.14164	0.887364	0.999637	22	16	52	31	65	65	34.8025	26.1825	49.067	40.178	29.9954	40.3708
46	Chr1:121809285-121810285	39.7965	-0.181855	0.302304	-0.601563	0.547465	0.999637	24	26	58	34	71	43	37.9664	42.5466	54.7286	44.0662	32.7642	26.7068
47	Chr1:121893311-121894311	30.4446	-0.364406	0.355431	-1.02525	0.305245	0.999637	15	9	55	21	63	58	23.729	14.7277	51.8978	27.2174	29.0724	36.0232
48	Chr1:121903058-121904058	20.9082	0.408303	0.412185	0.99058	0.32189	0.999637	6	11	25	15	45	55	9.49159	18.0005	23.5899	19.441	20.766	34.1599
49	Chr1:121970151-121971151	30.7574	-0.387945	0.344099	-1.12742	0.259564	0.999637	17	7	46	32	75	43	26.8928	11.4548	43.4054	41.4741	34.6101	26.7068
50	Chr1:122017155-122018155	53.5123	-0.214087	0.268027	-0.798753	0.424434	0.999637	39	23	71	50	98	72	61.6953	37.6374	66.9954	64.8033	45.2238	44.7184
51	Chr1:122017265-122018265	53.8776	-0.231151	0.258221	-0.895166	0.370699	0.999637	39	26	71	46	102	73	61.6953	42.5466	66.9954	59.619	47.0697	45.3395
52	Chr1:122168782-122169782	4.67673	-0.0657013	0.851906	-0.0771228	0.938526	0.999637	4	5	3	1	11	7	6.32773	8.18203	2.83079	1.29607	5.07614	4.34763
53	Chr1:122236660-122237660	37.5209	0.210003	0.278258	0.754705	0.450426	0.999637	19	25	39	29	80	69	30.0567	40.9102	36.8003	37.5859	36.9174	42.8552
54	Chr1:122401161-122402161	10.3136	0.619727	0.616857	1.00465	0.315064	0.999637	5	10	6	4	23	26	7.90966	16.3641	5.66158	5.18426	10.6138	16.1483
55	Chr1:122498496-122499496	18.6834	-0.10326	0.416246	-0.248075	0.804076	0.999637	10	12	20	10	50	35	15.8193	19.6369	18.8719	12.9607	23.0734	21.7381
56	Chr1:123228666-123229666	7.81177	0.818233	0.766658	1.06727	0.285848	0.999637	2	10	4	1	20	21	3.16386	16.3641	3.77439	1.29607	9.22935	13.0429
57	Chr1:123327127-123328127	29.711	-0.0703575	0.348556	-0.201854	0.840031	0.999637	23	16	38	30	43	34	36.3844	26.1825	35.8567	38.882	19.8431	21.117
58	Chr1:123424542-123425542	21.1278	0.270243	0.41566	0.650155	0.515592	0.999637	9	13	16	12	60	53	14.2374	21.2733	15.0975	15.5528	27.688	32.9177
59	Chr1:123464066-123465066	28.5905	-0.293423	0.331319	-0.885621	0.375822	0.999637	18	15	39	26	61	32	28.4748	24.5461	36.8003	33.6977	28.1495	19.8749
60	Chr1:125941636-125942636	23.6912	-0.306568	0.357405	-0.857759	0.391025	0.999637	17	12	26	13	61	42	26.8928	19.6369	24.5335	16.8489	28.1495	26.0858
61	Chr1:12708127-12709127	42.7996	-0.0961913	0.278232	-0.345723	0.729551	0.999637	28	20	58	36	77	69	44.2941	32.7281	54.7286	46.6584	35.533	42.8552
62	Chr1:127331567-127332567	34.2963	-0.45356	0.299477	-1.51451	0.129898	0.999637	30	16	40	26	75	42	47.4579	26.1825	37.7439	33.6977	34.6101	26.0858
63	Chr1:127457094-127458094	49.9457	-0.39984	0.260811	-1.53307	0.12526	0.999637	35	24	63	43	118	57	55.3676	39.2738	59.4466	55.7308	54.4532	35.4021
64	Chr1:127573073-127574073	14.7536	-0.0669624	0.501751	-0.133457	0.893832	0.999637	6	7	14	10	48	31	9.49159	11.4548	13.2104	12.9607	22.1504	19.2538
65	Chr1:127809178-127810178	15.6341	0.369318	0.489027	0.755211	0.450122	0.999637	4	11	15	10	42	37	6.32773	18.0005	14.1539	12.9607	19.3816	22.9803
66	Chr1:128726876-128727876	14.0682	-0.266193	0.495682	-0.537024	0.591251	0.999637	8	7	14	10	43	23	12.6555	11.4548	13.2104	12.9607	19.8431	14.2851
67	Chr1:129101064-129102064	48.8842	-0.166688	0.265922	-0.626832	0.530769	0.999637	27	30	63	43	109	58	42.7122	49.0922	59.4466	55.7308	50.3	36.0232
68	Chr1:129574173-129575173	31.0123	-0.112517	0.310494	-0.362381	0.717067	0.999637	19	13	34	24	77	58	30.0567	21.2733	32.0823	31.1056	35.533	36.0232
69	Chr1:129625491-129626491	7.19155	0.940021	0.729859	1.28795	0.197764	0.999637	4	6	3	3	13	23	6.32773	9.81844	2.83079	3.8882	5.99908	14.2851
70	Chr1:129670242-129671242	51.1902	-0.337921	0.255997	-1.32002	0.186829	0.999637	38	29	66	38	106	63	60.1134	47.4558	62.2774	49.2505	48.9155	39.1286
71	Chr1:129736367-129737367	8.34398	1.2365	0.697166	1.77361	0.0761272	0.999637	0	7	8	7	14	25	0	11.4548	7.54877	9.07246	6.46054	15.5272
72	Chr1:129764851-129765851	42.1088	-0.279205	0.297379	-0.938884	0.34779	0.999637	34	22	60	32	65	56	53.7857	36.0009	56.6158	41.4741	29.9954	34.781
73	Chr1:12980758-12981758	27.8405	-0.327741	0.329641	-0.994236	0.320108	0.999637	16	12	35	25	73	37	25.3109	19.6369	33.0259	32.4016	33.6871	22.9803
74	Chr1:129999124-130000124	43.1576	-0.17844	0.268851	-0.663713	0.506874	0.999637	29	24	52	37	91	56	45.876	39.2738	49.067	47.9544	41.9935	34.781
75	Chr1:129999384-130000384	52.2361	-0.0848487	0.250559	-0.338637	0.734883	0.999637	32	29	61	47	113	72	50.6218	47.4558	57.5594	60.9151	52.1458	44.7184
76	Chr1:130140259-130141259	44.4155	-0.13932	0.269977	-0.516046	0.605822	0.999637	27	18	57	37	97	77	42.7122	29.4553	53.785	47.9544	44.7623	47.8239
77	Chr1:130224395-130225395	9.4464	0.046104	0.631785	0.0729742	0.941827	0.999637	7	7	7	3	23	21	11.0735	11.4548	6.60518	3.8882	10.6138	13.0429
78	Chr1:130255733-130256733	42.3859	-0.344029	0.270313	-1.2727	0.203123	0.999637	32	18	52	34	95	60	50.6218	29.4553	49.067	44.0662	43.8394	37.2654
79	Chr1:130313493-130314493	42.7833	-0.0432082	0.269451	-0.160357	0.8726	0.999637	27	22	54	33	83	74	42.7122	36.0009	50.9542	42.7702	38.3018	45.9606
80	Chr1:130488370-130489370	35.6639	-0.108024	0.30628	-0.352696	0.724316	0.999637	17	16	51	36	76	50	26.8928	26.1825	48.1234	46.6584	35.0715	31.0545
81	Chr1:13116744-13117744	35.6688	-0.50546	0.313278	-1.61346	0.106645	0.999637	34	19	45	26	65	37	53.7857	31.0917	42.4618	33.6977	29.9954	22.9803
82	Chr1:131169380-131170380	32.5115	0.323633	0.301951	1.07181	0.283807	0.999637	18	19	26	28	73	66	28.4748	31.0917	24.5335	36.2898	33.6871	40.9919
83	Chr1:132319086-132320086	12.4731	0.135522	0.59487	0.227818	0.819788	0.999637	10	12	6	3	31	25	15.8193	19.6369	5.66158	3.8882	14.3055	15.5272
84	Chr1:132358821-132359821	40.142	-0.235797	0.28722	-0.820963	0.411667	0.999637	31	16	52	34	75	61	49.0399	26.1825	49.067	44.0662	34.6101	37.8865
85	Chr1:132525698-132526698	8.19412	0.754228	0.667504	1.12992	0.258509	0.999637	1	7	9	7	16	18	1.58193	11.4548	8.49237	9.07246	7.38348	11.1796
86	Chr1:132557709-132558709	6.70324	0.873962	0.729156	1.19859	0.230686	0.999637	3	6	3	4	14	18	4.74579	9.81844	2.83079	5.18426	6.46054	11.1796
87	Chr1:132613405-132614405	55.9233	-0.0802252	0.255286	-0.314256	0.753327	0.999637	46	37	58	34	103	90	72.7689	60.547	54.7286	44.0662	47.5311	55.8981
88	Chr1:132625330-132626330	7.75201	0.926758	0.672648	1.37778	0.168273	0.999637	4	7	4	6	13	18	6.32773	11.4548	3.77439	7.7764	5.99908	11.1796
89	Chr1:132628054-132629054	16.6057	0.203723	0.442659	0.460224	0.645355	0.999637	10	9	14	17	37	27	15.8193	14.7277	13.2104	22.0331	17.0743	16.7694
90	Chr1:132696980-132697980	9.61834	1.12726	0.664287	1.69694	0.0897078	0.999637	1	8	5	7	23	30	1.58193	13.0913	4.71798	9.07246	10.6138	18.6327
91	Chr1:132722762-132723762	9.19597	0.481636	0.70162	0.686463	0.492421	0.999637	2	12	7	2	26	18	3.16386	19.6369	6.60518	2.59213	11.9982	11.1796
92	Chr1:132761747-132762747	6.1109	-0.608036	0.835938	-0.72737	0.466999	0.999637	4	5	2	1	29	9	6.32773	8.18203	1.88719	1.29607	13.3826	5.58981
93	Chr1:132783531-132784531	8.59421	0.0836757	0.648199	0.129089	0.897287	0.999637	5	3	6	8	25	18	7.90966	4.90922	5.66158	10.3685	11.5367	11.1796
94	Chr1:132807373-132808373	10.2447	0.387269	0.597019	0.64867	0.516552	0.999637	6	8	5	8	26	19	9.49159	13.0913	4.71798	10.3685	11.9982	11.8007
95	Chr1:132836150-132837150	6.60925	0.496192	0.716537	0.692487	0.488632	0.999637	3	6	4	5	16	12	4.74579	9.81844	3.77439	6.48033	7.38348	7.45307
96	Chr1:132915923-132916923	8.33603	0.667634	0.670433	0.995826	0.319335	0.999637	4	8	6	3	16	22	6.32773	13.0913	5.66158	3.8882	7.38348	13.664
97	Chr1:132993644-132994644	36.6383	-0.219862	0.310136	-0.70892	0.478374	0.999637	24	22	53	32	64	40	37.9664	36.0009	50.0106	41.4741	29.5339	24.8436
98	Chr1:133034311-133035311	64.2323	-0.300754	0.25092	-1.1986	0.230683	0.999637	51	26	75	59	136	84	80.6785	42.5466	70.7697	76.4679	62.7596	52.1715
99	Chr1:133049259-133050259	51.9293	-0.0790636	0.288001	-0.274526	0.783681	0.999637	39	28	63	54	85	57	61.6953	45.8194	59.4466	69.9876	39.2247	35.4021
100	Chr1:133141335-133142335	45.1988	-0.195713	0.260135	-0.752351	0.45184	0.999637	32	29	51	31	99	63	50.6218	47.4558	48.1234	40.178	45.6853	39.1286
101	Chr1:133175683-133176683	11.2707	0.289494	0.594432	0.48701	0.626251	0.999637	6	7	6	6	33	29	9.49159	11.4548	5.66158	7.7764	15.2284	18.0116
102	Chr1:133423438-133424438	31.6169	0.148641	0.300954	0.4939	0.621377	0.999637	19	23	30	24	67	51	30.0567	37.6374	28.3079	31.1056	30.9183	31.6756
103	Chr1:133423981-133424981	31.393	0.226707	0.318002	0.71291	0.475902	0.999637	12	19	41	32	60	49	18.9832	31.0917	38.6875	41.4741	27.688	30.4334
104	Chr1:133495317-133496317	15.5878	0.543937	0.492435	1.10459	0.269339	0.999637	5	6	16	14	33	44	7.90966	9.81844	15.0975	18.1449	15.2284	27.3279
105	Chr1:133534384-133535384	8.96468	0.937924	0.646969	1.44972	0.147137	0.999637	4	7	4	6	18	26	6.32773	11.4548	3.77439	7.7764	8.30641	16.1483
106	Chr1:133584773-133585773	9.49613	0.291498	0.646922	0.450592	0.652283	0.999637	6	9	4	4	26	19	9.49159	14.7277	3.77439	5.18426	11.9982	11.8007
107	Chr1:13363664-13364664	61.8608	-0.0339856	0.25165	-0.135051	0.892572	0.999637	37	37	81	56	113	82	58.5315	60.547	76.4313	72.5797	52.1458	50.9293
108	Chr1:133640100-133641100	11.3885	0.445653	0.595408	0.748483	0.454169	0.999637	8	10	6	4	24	28	12.6555	16.3641	5.66158	5.18426	11.0752	17.3905
109	Chr1:133693459-133694459	29.8138	0.394122	0.31713	1.24278	0.21395	0.999637	18	18	26	33	53	47	28.4748	29.4553	24.5335	42.7702	24.4578	29.1912
110	Chr1:133723571-133724571	36.8603	-0.395173	0.284528	-1.38887	0.164871	0.999637	27	20	49	23	81	52	42.7122	32.7281	46.2362	29.8095	37.3789	32.2967
111	Chr1:133763302-133764302	35.9847	-0.0883504	0.297312	-0.297164	0.766341	0.999637	21	17	50	33	68	54	33.2206	27.8189	47.1798	42.7702	31.3798	33.5388
112	Chr1:133806536-133807536	45.1768	-0.349295	0.277968	-1.2566	0.208897	0.999637	34	23	66	32	81	62	53.7857	37.6374	62.2774	41.4741	37.3789	38.5075
113	Chr1:133866687-133867687	13.2405	0.469979	0.570287	0.82411	0.409877	0.999637	6	16	6	7	36	20	9.49159	26.1825	5.66158	9.07246	16.6128	12.4218
114	Chr1:133903685-133904685	44.0939	0.00763923	0.267974	0.0285073	0.977258	0.999637	26	22	47	44	99	65	41.1302	36.0009	44.349	57.0269	45.6853	40.3708
115	Chr1:133964139-133965139	30.5645	-0.136425	0.317964	-0.429058	0.667881	0.999637	25	13	26	27	72	48	39.5483	21.2733	24.5335	34.9938	33.2257	29.8123
116	Chr1:134035762-134036762	35.1945	-0.338459	0.290793	-1.16392	0.244457	0.999637	26	15	42	29	82	49	41.1302	24.5461	39.6311	37.5859	37.8403	30.4334
117	Chr1:134087514-134088514	48.9748	-0.174263	0.288492	-0.604047	0.545812	0.999637	33	29	69	45	82	53	52.2037	47.4558	65.1082	58.323	37.8403	32.9177
118	Chr1:134125844-134126844	11.7475	0.347035	0.562334	0.617133	0.537147	0.999637	6	11	8	6	29	23	9.49159	18.0005	7.54877	7.7764	13.3826	14.2851
119	Chr1:134194704-134195704	37.0958	0.294272	0.296017	0.994106	0.320171	0.999637	26	31	27	31	71	52	41.1302	50.7286	25.4771	40.178	32.7642	32.2967
120	Chr1:134212204-134213204	37.2691	0.162992	0.283502	0.574921	0.565345	0.999637	17	21	44	33	79	67	26.8928	34.3645	41.5183	42.7702	36.4559	41.613
121	Chr1:134287358-134288358	46.1511	-0.0932716	0.257978	-0.361549	0.717689	0.999637	32	27	46	38	105	66	50.6218	44.183	43.4054	49.2505	48.4541	40.9919
122	Chr1:134313531-134314531	40.37	-0.0188895	0.273155	-0.0691532	0.944868	0.999637	27	19	40	35	92	69	42.7122	31.0917	37.7439	45.3623	42.455	42.8552
123	Chr1:134373445-134374445	57.6725	-0.0677294	0.244827	-0.276642	0.782055	0.999637	39	37	70	43	108	84	61.6953	60.547	66.0518	55.7308	49.8385	52.1715
124	Chr1:134402308-134403308	10.9165	0.520681	0.564955	0.921633	0.35672	0.999637	6	6	8	10	22	25	9.49159	9.81844	7.54877	12.9607	10.1523	15.5272
125	Chr1:134439017-134440017	28.3674	0.00304826	0.321747	0.0094741	0.992441	0.999754	14	18	37	22	59	45	22.147	29.4553	34.9131	28.5135	27.2266	27.949
126	Chr1:134637874-134638874	37.255	0.0826132	0.306183	0.269816	0.787302	0.999637	16	18	56	33	67	68	25.3109	29.4553	52.8414	42.7702	30.9183	42.2341
127	Chr1:134776351-134777351	37.1683	-0.243777	0.287365	-0.848319	0.396261	0.999637	32	19	35	25	85	59	50.6218	31.0917	33.0259	32.4016	39.2247	36.6443
128	Chr1:134921443-134922443	59.1838	-0.280304	0.248202	-1.12934	0.258754	0.999637	46	34	73	45	116	74	72.7689	55.6378	68.8826	58.323	53.5302	45.9606
129	Chr1:134941745-134942745	36.5018	0.405755	0.284504	1.42618	0.153816	0.999637	18	21	34	38	72	67	28.4748	34.3645	32.0823	49.2505	33.2257	41.613
130	Chr1:135027221-135028221	52.2961	-0.351464	0.262161	-1.34065	0.180036	0.999637	42	25	66	44	104	63	66.4411	40.9102	62.2774	57.0269	47.9926	39.1286
131	Chr1:135142175-135143175	14.5802	0.563065	0.575222	0.978866	0.327646	0.999637	2	14	12	5	42	39	3.16386	22.9097	11.3232	6.48033	19.3816	24.2225
132	Chr1:135205901-135206901	8.46808	0.911279	0.78639	1.15881	0.246533	0.999637	5	10	1	1	19	25	7.90966	16.3641	0.943597	1.29607	8.76788	15.5272
133	Chr1:135217953-135218953	11.6586	1.09136	0.567448	1.92327	0.0544458	0.999637	4	9	5	12	23	29	6.32773	14.7277	4.71798	15.5528	10.6138	18.0116
134	Chr1:135246588-135247588	15.5976	0.163669	0.509017	0.321538	0.747802	0.999637	8	16	10	6	45	27	12.6555	26.1825	9.43597	7.7764	20.766	16.7694
135	Chr1:135259650-135260650	58.7482	-0.23039	0.242896	-0.94851	0.34287	0.999637	38	25	71	46	140	97	60.1134	40.9102	66.9954	59.619	64.6054	60.2457
136	Chr1:135320454-135321454	32.7145	-0.0983111	0.299386	-0.328376	0.742628	0.999637	25	18	31	27	72	48	39.5483	29.4553	29.2515	34.9938	33.2257	29.8123
137	Chr1:135506368-135507368	43.5755	-0.239818	0.288199	-0.832128	0.405337	0.999637	36	28	49	36	82	45	56.9495	45.8194	46.2362	46.6584	37.8403	27.949
138	Chr1:135557457-135558457	39.5856	0.0252194	0.283206	0.0890496	0.929043	0.999637	27	22	40	40	80	52	42.7122	36.0009	37.7439	51.8426	36.9174	32.2967
139	Chr1:135586185-135587185	10.4399	0.389093	0.591889	0.657375	0.51094	0.999637	6	6	8	6	23	28	9.49159	9.81844	7.54877	7.7764	10.6138	17.3905
140	Chr1:135597958-135598958	6.40206	-0.206931	0.729073	-0.283827	0.776543	0.999637	6	2	6	6	13	10	9.49159	3.27281	5.66158	7.7764	5.99908	6.21089
141	Chr1:135697118-135698118	30.9795	-0.00550001	0.304725	-0.0180491	0.9856	0.999637	21	16	34	25	63	53	33.2206	26.1825	32.0823	32.4016	29.0724	32.9177
142	Chr1:13579445-13580445	37.6016	-0.130027	0.322509	-0.403173	0.686821	0.999637	19	29	59	29	65	40	30.0567	47.4558	55.6722	37.5859	29.9954	24.8436
143	Chr1:135804076-135805076	12.8794	0.10231	0.513324	0.199308	0.842021	0.999637	7	7	15	12	26	21	11.0735	11.4548	14.1539	15.5528	11.9982	13.0429
144	Chr1:135817491-135818491	10.612	0.447629	0.606274	0.738328	0.460315	0.999637	4	9	7	5	29	26	6.32773	14.7277	6.60518	6.48033	13.3826	16.1483
145	Chr1:135933332-135934332	11.4096	0.283579	0.608793	0.465805	0.641355	0.999637	9	10	6	3	25	27	14.2374	16.3641	5.66158	3.8882	11.5367	16.7694
146	Chr1:135975197-135976197	43.8871	-0.0659226	0.27527	-0.239484	0.81073	0.999637	23	28	55	40	95	54	36.3844	45.8194	51.8978	51.8426	43.8394	33.5388
147	Chr1:136005416-136006416	8.48733	0.584451	0.647274	0.902942	0.366557	0.999637	5	8	5	8	16	12	7.90966	13.0913	4.71798	10.3685	7.38348	7.45307
148	Chr1:136007320-136008320	9.29855	0.118233	0.620521	0.190538	0.848887	0.999637	6	8	6	6	24	14	9.49159	13.0913	5.66158	7.7764	11.0752	8.69525
149	Chr1:136078254-136079254	10.8652	-0.334861	0.567946	-0.5896	0.555459	0.999637	9	4	12	8	25	18	14.2374	6.54563	11.3232	10.3685	11.5367	11.1796
150	Chr1:136089526-136090526	14.9519	0.212916	0.489211	0.435223	0.6634	0.999637	10	9	8	13	39	27	15.8193	14.7277	7.54877	16.8489	17.9972	16.7694
151	Chr1:136131508-136132508	29.9436	-0.410997	0.322835	-1.27309	0.202987	0.999637	17	12	35	21	92	49	26.8928	19.6369	33.0259	27.2174	42.455	30.4334
152	Chr1:136186082-136187082	16.0287	0.318577	0.479932	0.663795	0.506821	0.999637	6	16	16	7	37	31	9.49159	26.1825	15.0975	9.07246	17.0743	19.2538
153	Chr1:136229005-136230005	6.97018	0.787984	0.754346	1.04459	0.296211	0.999637	2	2	4	6	18	25	3.16386	3.27281	3.77439	7.7764	8.30641	15.5272
154	Chr1:136258076-136259076	56.4523	-0.228579	0.27625	-0.827435	0.407991	0.999637	38	27	77	57	107	62	60.1134	44.183	72.6569	73.8758	49.377	38.5075
155	Chr1:136282018-136283018	6.21815	0.643242	0.773675	0.831412	0.405741	0.999637	5	5	3	2	10	18	7.90966	8.18203	2.83079	2.59213	4.61467	11.1796
156	Chr1:136301859-136302859	38.7265	-0.236955	0.317111	-0.747229	0.454925	0.999637	26	23	55	37	68	36	41.1302	37.6374	51.8978	47.9544	31.3798	22.3592
157	Chr1:136311456-136312456	43.2703	-0.21231	0.284117	-0.747263	0.454905	0.999637	28	15	51	45	102	60	44.2941	24.5461	48.1234	58.323	47.0697	37.2654
158	Chr1:136351609-136352609	61.473	-0.472568	0.247509	-1.9093	0.056224	0.999637	42	26	91	47	136	81	66.4411	42.5466	85.8673	60.9151	62.7596	50.3082
159	Chr1:136373287-136374287	6.12092	0.0345405	0.814487	0.0424076	0.966174	0.999637	5	5	4	0	15	16	7.90966	8.18203	3.77439	0	6.92201	9.93743
160	Chr1:136390726-136391726	55.5363	-0.0932993	0.265087	-0.351957	0.724871	0.999637	28	26	77	55	117	78	44.2941	42.5466	72.6569	71.2836	53.9917	48.445
161	Chr1:136445759-136446759	17.2098	-0.147323	0.451334	-0.326417	0.744109	0.999637	8	6	27	15	36	31	12.6555	9.81844	25.4771	19.441	16.6128	19.2538
162	Chr1:136456249-136457249	32.4497	-0.333084	0.32062	-1.03888	0.298863	0.999637	26	15	42	30	61	36	41.1302	24.5461	39.6311	38.882	28.1495	22.3592
163	Chr1:13650127-13651127	47.093	0.191173	0.27237	0.701885	0.482751	0.999637	28	43	45	33	93	64	44.2941	70.3655	42.4618	42.7702	42.9165	39.7497
164	Chr1:13658353-13659353	6.88249	1.10808	0.797413	1.38959	0.164654	0.999637	2	10	3	1	14	18	3.16386	16.3641	2.83079	1.29607	6.46054	11.1796
165	Chr1:136605378-136606378	41.7219	-0.046798	0.27489	-0.170242	0.86482	0.999637	21	20	49	39	101	66	33.2206	32.7281	46.2362	50.5466	46.6082	40.9919
166	Chr1:136852019-136853019	41.8625	0.107304	0.267297	0.401439	0.688097	0.999637	24	27	48	35	81	66	37.9664	44.183	45.2926	45.3623	37.3789	40.9919
167	Chr1:136858643-136859643	40.6769	-0.155122	0.29825	-0.520108	0.602988	0.999637	17	24	64	35	85	53	26.8928	39.2738	60.3902	45.3623	39.2247	32.9177
168	Chr1:137001353-137002353	37.5103	-0.101166	0.305948	-0.330663	0.740899	0.999637	17	17	57	37	76	54	26.8928	27.8189	53.785	47.9544	35.0715	33.5388
169	Chr1:137008383-137009383	10.637	0.363266	0.614081	0.591559	0.554146	0.999637	8	6	3	11	27	19	12.6555	9.81844	2.83079	14.2567	12.4596	11.8007
170	Chr1:137028803-137029803	18.4279	-0.219841	0.427225	-0.514579	0.606847	0.999637	16	13	18	8	39	30	25.3109	21.2733	16.9847	10.3685	17.9972	18.6327
171	Chr1:137042902-137043902	52.7096	-0.0714386	0.269985	-0.264602	0.791316	0.999637	24	39	75	39	109	69	37.9664	63.8199	70.7697	50.5466	50.3	42.8552
172	Chr1:137063758-137064758	13.8316	0.302523	0.509199	0.594115	0.552435	0.999637	4	7	17	13	31	29	6.32773	11.4548	16.0411	16.8489	14.3055	18.0116
173	Chr1:137154549-137155549	35.6992	-0.198045	0.294407	-0.672692	0.501143	0.999637	30	18	39	29	69	50	47.4579	29.4553	36.8003	37.5859	31.8413	31.0545
174	Chr1:137180161-137181161	41.4985	-0.00888992	0.281897	-0.031536	0.974842	0.999637	21	18	54	41	88	67	33.2206	29.4553	50.9542	53.1387	40.6091	41.613
175	Chr1:137209855-137210855	58.6161	-0.121429	0.256195	-0.473971	0.63552	0.999637	39	28	80	50	104	90	61.6953	45.8194	75.4877	64.8033	47.9926	55.8981
176	Chr1:137220885-137221885	20.2557	0.399203	0.39338	1.0148	0.3102	0.999637	13	12	14	17	42	43	20.5651	19.6369	13.2104	22.0331	19.3816	26.7068
177	Chr1:137271314-137272314	30.9331	-0.302238	0.308449	-0.979864	0.327153	0.999637	23	13	38	23	69	49	36.3844	21.2733	35.8567	29.8095	31.8413	30.4334
178	Chr1:137326576-137327576	46.22	-0.222832	0.26412	-0.843674	0.398852	0.999637	29	28	61	36	97	59	45.876	45.8194	57.5594	46.6584	44.7623	36.6443
179	Chr1:137480851-137481851	27.4218	0.169133	0.340778	0.496315	0.619672	0.999637	11	17	24	25	76	47	17.4012	27.8189	22.6463	32.4016	35.0715	29.1912
180	Chr1:137481432-137482432	33.678	-0.0352238	0.299472	-0.11762	0.906369	0.999637	16	17	38	28	87	59	25.3109	27.8189	35.8567	36.2898	40.1477	36.6443
181	Chr1:137584182-137585182	59.5303	-0.211591	0.259186	-0.816369	0.414289	0.999637	43	30	73	57	118	69	68.0231	49.0922	68.8826	73.8758	54.4532	42.8552
182	Chr1:137616139-137617139	14.5238	-0.0654836	0.484405	-0.135184	0.892467	0.999637	11	11	13	9	32	21	17.4012	18.0005	12.2668	11.6646	14.767	13.0429
183	Chr1:137662197-137663197	49.6139	-0.120166	0.251069	-0.478617	0.632211	0.999637	37	28	51	38	107	75	58.5315	45.8194	48.1234	49.2505	49.377	46.5817
184	Chr1:137679143-137680143	15.7727	0.604769	0.50378	1.20046	0.22996	0.999637	10	19	12	6	23	29	15.8193	31.0917	11.3232	7.7764	10.6138	18.0116
185	Chr1:137714676-137715676	33.2043	-0.08536	0.295852	-0.288523	0.772947	0.999637	21	21	34	27	78	46	33.2206	34.3645	32.0823	34.9938	35.9945	28.5701
186	Chr1:137736953-137737953	14.6414	0.140398	0.503777	0.27869	0.780483	0.999637	6	12	15	6	38	31	9.49159	19.6369	14.1539	7.7764	17.5358	19.2538
187	Chr1:137815284-137816284	31.3294	0.0362358	0.34381	0.105395	0.916063	0.999637	8	19	37	22	93	61	12.6555	31.0917	34.9131	28.5135	42.9165	37.8865
188	Chr1:137902419-137903419	10.3762	0.437077	0.59584	0.733547	0.463225	0.999637	8	9	5	8	20	17	12.6555	14.7277	4.71798	10.3685	9.22935	10.5585
189	Chr1:137904297-137905297	27.0672	-0.0251437	0.335539	-0.074935	0.940266	0.999637	15	12	33	28	58	40	23.729	19.6369	31.1387	36.2898	26.7651	24.8436
190	Chr1:137948828-137949828	9.80037	1.09783	0.663272	1.65518	0.0978879	0.999637	2	11	4	5	23	27	3.16386	18.0005	3.77439	6.48033	10.6138	16.7694
191	Chr1:138027467-138028467	36.3117	-0.0718257	0.285428	-0.251642	0.801318	0.999637	25	23	37	30	79	49	39.5483	37.6374	34.9131	38.882	36.4559	30.4334
192	Chr1:138103174-138104174	9.97854	0.520483	0.638919	0.814631	0.415284	0.999637	5	5	4	7	28	29	7.90966	8.18203	3.77439	9.07246	12.9211	18.0116
193	Chr1:138130341-138131341	37.9222	0.0792157	0.288954	0.274147	0.783972	0.999637	17	20	49	37	79	60	26.8928	32.7281	46.2362	47.9544	36.4559	37.2654
194	Chr1:138156950-138157950	34.9252	-0.0841345	0.300261	-0.280205	0.77932	0.999637	27	17	27	28	88	59	42.7122	27.8189	25.4771	36.2898	40.6091	36.6443
195	Chr1:138242181-138243181	52.8211	0.125531	0.262953	0.477389	0.633085	0.999637	32	32	61	54	93	70	50.6218	52.365	57.5594	69.9876	42.9165	43.4763
196	Chr1:138311349-138312349	31.6901	-0.513047	0.322061	-1.59301	0.111157	0.999637	22	18	50	22	63	34	34.8025	29.4553	47.1798	28.5135	29.0724	21.117
197	Chr1:138364036-138365036	10.1381	0.0119201	0.583131	0.0204416	0.983691	0.999637	6	8	11	6	22	16	9.49159	13.0913	10.3796	7.7764	10.1523	9.93743
198	Chr1:138520979-138521979	43.6816	-0.315283	0.287748	-1.09569	0.273213	0.999637	24	27	65	36	94	46	37.9664	44.183	61.3338	46.6584	43.3779	28.5701
199	Chr1:138856504-138857504	8.48515	0.500485	0.645679	0.775129	0.438263	0.999637	3	5	6	8	22	19	4.74579	8.18203	5.66158	10.3685	10.1523	11.8007
200	Chr1:139824248-139825248	7.20556	1.57438	0.764972	2.05808	0.0395821	0.999637	3	11	2	3	9	17	4.74579	18.0005	1.88719	3.8882	4.15321	10.5585
201	Chr1:140071382-140072382	6.32417	0.507522	0.773915	0.655785	0.511963	0.999637	3	8	6	1	11	13	4.74579	13.0913	5.66158	1.29607	5.07614	8.07416
202	Chr1:140169816-140170816	11.1213	0.47227	0.575731	0.820295	0.412048	0.999637	4	12	10	7	24	18	6.32773	19.6369	9.43597	9.07246	11.0752	11.1796
203	Chr1:140515773-140516773	35.601	0.168257	0.286581	0.587117	0.557125	0.999637	20	22	41	31	66	59	31.6386	36.0009	38.6875	40.178	30.4569	36.6443
204	Chr1:140744653-140745653	26.1182	-0.143842	0.33889	-0.424449	0.671238	0.999637	16	14	27	16	69	49	25.3109	22.9097	25.4771	20.7371	31.8413	30.4334
205	Chr1:140752931-140753931	10.0614	-0.339169	0.587807	-0.577007	0.563935	0.999637	6	5	15	7	22	15	9.49159	8.18203	14.1539	9.07246	10.1523	9.31634
206	Chr1:140859514-140860514	40.995	-0.01782	0.290021	-0.0614437	0.951006	0.999637	36	17	37	36	77	71	56.9495	27.8189	34.9131	46.6584	35.533	44.0974
207	Chr1:141273177-141274177	10.8956	1.00006	0.581773	1.71898	0.0856172	0.999637	3	12	9	8	17	23	4.74579	19.6369	8.49237	10.3685	7.84495	14.2851
208	Chr1:141318461-141319461	50.3413	-0.24485	0.259525	-0.943453	0.345449	0.999637	35	24	69	38	98	77	55.3676	39.2738	65.1082	49.2505	45.2238	47.8239
209	Chr1:141350851-141351851	48.5984	-0.0963924	0.261104	-0.369172	0.711999	0.999637	34	23	50	47	108	68	53.7857	37.6374	47.1798	60.9151	49.8385	42.2341
210	Chr1:141397785-141398785	5.84994	0.259421	0.771919	0.336073	0.736816	0.999637	3	7	5	2	13	9	4.74579	11.4548	4.71798	2.59213	5.99908	5.58981
211	Chr1:141456335-141457335	7.47444	1.14836	0.734446	1.56357	0.117918	0.999637	1	10	4	4	16	17	1.58193	16.3641	3.77439	5.18426	7.38348	10.5585
212	Chr1:141524388-141525388	4.77212	0.40408	0.820224	0.492645	0.622263	0.999637	2	2	3	6	13	9	3.16386	3.27281	2.83079	7.7764	5.99908	5.58981
213	Chr1:141677316-141678316	4.33765	-0.0316517	0.874112	-0.0362101	0.971115	0.999637	5	2	2	2	9	10	7.90966	3.27281	1.88719	2.59213	4.15321	6.21089
214	Chr1:141914981-141915981	2.56696	1.08317	1.07329	1.0092	0.312879	0.999637	0	3	1	2	7	6	0	4.90922	0.943597	2.59213	3.23027	3.72654
215	Chr1:142079488-142080488	8.23594	0.370289	0.670656	0.552129	0.58086	0.999637	7	8	4	5	15	13	11.0735	13.0913	3.77439	6.48033	6.92201	8.07416
216	Chr1:142142294-142143294	37.5023	0.0100362	0.295585	0.0339536	0.972914	0.999637	16	19	53	29	80	71	25.3109	31.0917	50.0106	37.5859	36.9174	44.0974
217	Chr1:14299781-14300781	35.2128	0.198316	0.296079	0.669808	0.50298	0.999637	13	25	42	28	78	61	20.5651	40.9102	39.6311	36.2898	35.9945	37.8865
218	Chr1:145453238-145454238	3.58863	-0.667848	0.986328	-0.677106	0.498339	0.999637	2	3	2	0	17	6	3.16386	4.90922	1.88719	0	7.84495	3.72654
219	Chr1:145487295-145488295	11.1606	0.733314	0.589489	1.24398	0.213506	0.999637	2	10	10	7	25	28	3.16386	16.3641	9.43597	9.07246	11.5367	17.3905
220	Chr1:145549523-145550523	48.7835	-0.123725	0.2635	-0.469543	0.638682	0.999637	28	27	66	43	98	66	44.2941	44.183	62.2774	55.7308	45.2238	40.9919
221	Chr1:145585660-145586660	26.943	0.196622	0.332173	0.591926	0.5539	0.999637	19	15	27	25	46	45	30.0567	24.5461	25.4771	32.4016	21.2275	27.949
222	Chr1:145623698-145624698	52.462	-0.281041	0.246629	-1.13953	0.254483	0.999637	33	27	66	40	125	75	52.2037	44.183	62.2774	51.8426	57.6834	46.5817
223	Chr1:145623909-145624909	60.6841	-0.311046	0.240259	-1.29463	0.195448	0.999637	43	35	75	46	134	75	68.0231	57.2742	70.7697	59.619	61.8366	46.5817
224	Chr1:145850791-145851791	31.945	-0.11807	0.304166	-0.388178	0.697885	0.999637	22	14	38	25	67	56	34.8025	22.9097	35.8567	32.4016	30.9183	34.781
225	Chr1:146024002-146025002	6.44875	-0.17246	0.772431	-0.223269	0.823326	0.999637	5	4	4	1	20	16	7.90966	6.54563	3.77439	1.29607	9.22935	9.93743
226	Chr1:146095872-146096872	5.71819	1.25861	0.812926	1.54825	0.121563	0.999637	3	7	2	2	8	16	4.74579	11.4548	1.88719	2.59213	3.69174	9.93743
227	Chr1:146387942-146388942	4.09016	0.068971	0.945851	0.0729195	0.94187	0.999637	1	4	4	5	12	1	1.58193	6.54563	3.77439	6.48033	5.53761	0.621089
228	Chr1:146622065-146623065	4.98153	0.442643	0.812786	0.544599	0.586029	0.999637	4	5	3	3	8	8	6.32773	8.18203	2.83079	3.8882	3.69174	4.96872
229	Chr1:14745036-14746036	43.8597	-0.186957	0.263193	-0.710342	0.477492	0.999637	33	26	44	29	102	68	52.2037	42.5466	41.5183	37.5859	47.0697	42.2341
230	Chr1:14745547-14746547	36.1212	-0.156033	0.28675	-0.544143	0.586343	0.999637	29	19	37	27	76	56	45.876	31.0917	34.9131	34.9938	35.0715	34.781
231	Chr1:148267065-148268065	5.99982	1.04766	0.83238	1.25863	0.208162	0.999637	1	5	1	4	18	19	1.58193	8.18203	0.943597	5.18426	8.30641	11.8007
232	Chr1:148342260-148343260	14.5909	0.222383	0.510191	0.435882	0.662922	0.999637	12	9	7	9	34	32	18.9832	14.7277	6.60518	11.6646	15.6899	19.8749
233	Chr1:14908443-14909443	27.0008	0.356169	0.331031	1.07594	0.281955	0.999637	16	14	22	25	56	56	25.3109	22.9097	20.7591	32.4016	25.8422	34.781
234	Chr1:149128572-149129572	4.20458	1.11146	0.866823	1.28222	0.199764	0.999637	2	3	3	4	5	11	3.16386	4.90922	2.83079	5.18426	2.30734	6.83198
235	Chr1:151807920-151808920	12.1672	-0.305854	0.551403	-0.554683	0.579111	0.999637	7	5	14	6	36	26	11.0735	8.18203	13.2104	7.7764	16.6128	16.1483
236	Chr1:151946755-151947755	24.5665	0.0785235	0.384258	0.204351	0.838079	0.999637	14	10	18	17	72	59	22.147	16.3641	16.9847	22.0331	33.2257	36.6443
237	Chr1:152166048-152167048	5.05378	0.29741	0.843324	0.352664	0.72434	0.999637	4	4	1	2	14	12	6.32773	6.54563	0.943597	2.59213	6.46054	7.45307
238	Chr1:152239469-152240469	35.412	-0.262149	0.293146	-0.894259	0.371183	0.999637	27	16	43	30	73	49	42.7122	26.1825	40.5747	38.882	33.6871	30.4334
239	Chr1:152239710-152240710	41.2271	-0.125767	0.277488	-0.453235	0.65038	0.999637	28	23	50	37	81	53	44.2941	37.6374	47.1798	47.9544	37.3789	32.9177
240	Chr1:152312795-152313795	6.11634	0.563642	0.755248	0.746301	0.455485	0.999637	2	3	5	4	15	19	3.16386	4.90922	4.71798	5.18426	6.92201	11.8007
241	Chr1:15259378-15260378	2.67652	0.440058	1.03989	0.423176	0.672167	0.999637	1	0	4	3	4	8	1.58193	0	3.77439	3.8882	1.84587	4.96872
242	Chr1:15276841-15277841	37.2645	0.152685	0.283	0.539522	0.589527	0.999637	18	23	37	34	88	61	28.4748	37.6374	34.9131	44.0662	40.6091	37.8865
243	Chr1:152840065-152841065	39.6406	-0.0616969	0.271525	-0.227224	0.82025	0.999637	25	21	42	32	92	65	39.5483	34.3645	39.6311	41.4741	42.455	40.3708
244	Chr1:153191129-153192129	44.769	-0.207453	0.263429	-0.78751	0.430984	0.999637	32	24	48	38	103	59	50.6218	39.2738	45.2926	49.2505	47.5311	36.6443
245	Chr1:153275085-153276085	50.2668	-0.220775	0.251555	-0.877641	0.380139	0.999637	34	30	61	38	109	67	53.7857	49.0922	57.5594	49.2505	50.3	41.613
246	Chr1:153275279-153276279	54.8864	-0.198048	0.242894	-0.815368	0.414861	0.999637	35	32	68	41	121	78	55.3676	52.365	64.1646	53.1387	55.8376	48.445
247	Chr1:153347453-153348453	40.2475	-0.368449	0.285539	-1.29036	0.196924	0.999637	27	16	52	38	95	49	42.7122	26.1825	49.067	49.2505	43.8394	30.4334
248	Chr1:153417817-153418817	33.0848	0.0563846	0.315773	0.178561	0.858283	0.999637	20	21	46	21	52	61	31.6386	34.3645	43.4054	27.2174	23.9963	37.8865
249	Chr1:153602005-153603005	51.7322	-0.334575	0.275757	-1.2133	0.225017	0.999637	39	16	71	39	105	91	61.6953	26.1825	66.9954	50.5466	48.4541	56.5191
250	Chr1:153936950-153937950	39.7616	-0.129888	0.291751	-0.445202	0.656174	0.999637	36	25	40	29	69	54	56.9495	40.9102	37.7439	37.5859	31.8413	33.5388
251	Chr1:154233318-154234318	34.4262	-0.159083	0.295711	-0.537968	0.590599	0.999637	25	17	42	29	67	50	39.5483	27.8189	39.6311	37.5859	30.9183	31.0545
252	Chr1:154246461-154247461	28.1613	-0.267738	0.321312	-0.833267	0.404694	0.999637	19	15	32	23	68	37	30.0567	24.5461	30.1951	29.8095	31.3798	22.9803
253	Chr1:154597182-154598182	11.4268	0.515654	0.57468	0.897289	0.369565	0.999637	7	10	6	6	25	26	11.0735	16.3641	5.66158	7.7764	11.5367	16.1483
254	Chr1:154612981-154613981	34.376	-0.360507	0.299821	-1.20241	0.229206	0.999637	28	12	40	28	78	52	44.2941	19.6369	37.7439	36.2898	35.9945	32.2967
255	Chr1:154613173-154614173	35.6956	-0.352466	0.2913	-1.20998	0.226288	0.999637	29	15	43	25	78	56	45.876	24.5461	40.5747	32.4016	35.9945	34.781
256	Chr1:154654521-154655521	26.4163	0.0100115	0.361109	0.0277243	0.977882	0.999637	25	17	26	20	37	38	39.5483	27.8189	24.5335	25.9213	17.0743	23.6014
257	Chr1:154749276-154750276	41.3306	-0.283634	0.273228	-1.03808	0.299231	0.999637	31	23	42	33	101	52	49.0399	37.6374	39.6311	42.7702	46.6082	32.2967
258	Chr1:154801732-154802732	33.1068	-0.216527	0.315543	-0.686203	0.492585	0.999637	14	14	49	25	83	59	22.147	22.9097	46.2362	32.4016	38.3018	36.6443
259	Chr1:155033077-155034077	30.9035	0.0721981	0.322884	0.223604	0.823066	0.999637	24	12	25	32	66	52	37.9664	19.6369	23.5899	41.4741	30.4569	32.2967
260	Chr1:155179416-155180416	47.5036	-0.194537	0.257851	-0.754457	0.450575	0.999637	36	24	55	33	99	78	56.9495	39.2738	51.8978	42.7702	45.6853	48.445
261	Chr1:155255226-155256226	7.35222	1.05236	0.712798	1.47637	0.139843	0.999637	3	8	3	4	14	19	4.74579	13.0913	2.83079	5.18426	6.46054	11.8007
262	Chr1:155271793-155272793	31.089	-0.294182	0.309248	-0.95128	0.341462	0.999637	21	21	35	16	78	47	33.2206	34.3645	33.0259	20.7371	35.9945	29.1912
263	Chr1:155334290-155335290	43.9447	-0.10753	0.2787	-0.385826	0.699625	0.999637	30	25	56	40	79	55	47.4579	40.9102	52.8414	51.8426	36.4559	34.1599
264	Chr1:155396344-155397344	32.6078	-0.243623	0.322117	-0.756319	0.449458	0.999637	18	14	53	28	61	48	28.4748	22.9097	50.0106	36.2898	28.1495	29.8123
265	Chr1:155499656-155500656	26.7478	0.284386	0.341644	0.832403	0.405182	0.999637	14	14	21	22	66	59	22.147	22.9097	19.8155	28.5135	30.4569	36.6443
266	Chr1:155586980-155587980	30.1153	-0.21136	0.615554	-0.343366	0.731323	0.999637	8	11	54	32	71	40	12.6555	18.0005	50.9542	41.4741	32.7642	24.8436
267	Chr1:155596057-155597057	16.2281	-0.110325	0.455682	-0.24211	0.808695	0.999637	8	13	20	9	39	24	12.6555	21.2733	18.8719	11.6646	17.9972	14.9061
268	Chr1:155690772-155691772	10.0227	0.404739	0.647944	0.624651	0.5322	0.999637	4	9	6	3	29	26	6.32773	14.7277	5.66158	3.8882	13.3826	16.1483
269	Chr1:155720976-155721976	11.6343	0.501026	0.554516	0.903538	0.36624	0.999637	7	9	8	7	23	27	11.0735	14.7277	7.54877	9.07246	10.6138	16.7694
270	Chr1:155738277-155739277	10.9718	0.620898	0.618242	1.0043	0.315236	0.999637	7	8	4	5	25	32	11.0735	13.0913	3.77439	6.48033	11.5367	19.8749
271	Chr1:155746575-155747575	46.7271	-0.151155	0.262801	-0.575168	0.565178	0.999637	28	24	64	35	95	76	44.2941	39.2738	60.3902	45.3623	43.8394	47.2028
272	Chr1:155746838-155747838	51.9337	-0.239569	0.24933	-0.960848	0.336629	0.999637	35	24	65	39	116	83	55.3676	39.2738	61.3338	50.5466	53.5302	51.5504
273	Chr1:155751932-155752932	8.25797	0.867565	0.646592	1.34175	0.179677	0.999637	4	6	5	9	14	17	6.32773	9.81844	4.71798	11.6646	6.46054	10.5585
274	Chr1:155763941-155764941	5.79156	0.891503	0.801502	1.11229	0.266013	0.999637	4	6	1	3	11	14	6.32773	9.81844	0.943597	3.8882	5.07614	8.69525
275	Chr1:156050728-156051728	11.6827	0.202922	0.587747	0.345254	0.729904	0.999637	7	7	7	5	33	31	11.0735	11.4548	6.60518	6.48033	15.2284	19.2538
276	Chr1:156572549-156573549	11.3349	0.225943	0.55851	0.404546	0.685811	0.999637	4	7	11	10	30	21	6.32773	11.4548	10.3796	12.9607	13.844	13.0429
277	Chr1:156946266-156947266	29.387	0.23109	0.31865	0.725214	0.468321	0.999637	21	18	29	26	48	49	33.2206	29.4553	27.3643	33.6977	22.1504	30.4334
278	Chr1:156993410-156994410	9.7755	0.162701	0.651418	0.249765	0.802769	0.999637	3	10	8	3	31	19	4.74579	16.3641	7.54877	3.8882	14.3055	11.8007
279	Chr1:157005334-157006334	35.9998	0.170861	0.294579	0.580018	0.561902	0.999637	15	27	45	24	74	65	23.729	44.183	42.4618	31.1056	34.1486	40.3708
280	Chr1:15701885-15702885	7.29079	0.500203	0.732985	0.682419	0.494974	0.999637	5	8	3	2	16	16	7.90966	13.0913	2.83079	2.59213	7.38348	9.93743
281	Chr1:157079370-157080370	11.2213	0.714528	0.576646	1.23911	0.215304	0.999637	5	9	5	12	26	20	7.90966	14.7277	4.71798	15.5528	11.9982	12.4218
282	Chr1:157264045-157265045	31.5897	-0.271207	0.301799	-0.898634	0.368848	0.999637	21	15	37	23	78	50	33.2206	24.5461	34.9131	29.8095	35.9945	31.0545
283	Chr1:157404751-157405751	48.3894	-0.313576	0.279387	-1.12237	0.261705	0.999637	43	22	52	45	97	55	68.0231	36.0009	49.067	58.323	44.7623	34.1599
284	Chr1:157588750-157589750	32.2344	0.0590683	0.300314	0.196688	0.844071	0.999637	18	20	32	29	75	48	28.4748	32.7281	30.1951	37.5859	34.6101	29.8123
285	Chr1:157659513-157660513	50.9903	-0.244471	0.273776	-0.892959	0.371879	0.999637	47	20	55	38	96	86	74.3508	32.7281	51.8978	49.2505	44.3009	53.4137
286	Chr1:157819520-157820520	48.8932	0.0344207	0.276581	0.124451	0.900958	0.999637	27	32	60	49	94	56	42.7122	52.365	56.6158	63.5072	43.3779	34.781
287	Chr1:157882034-157883034	55.1204	-0.213717	0.259309	-0.824181	0.409837	0.999637	45	31	68	41	96	76	71.1869	50.7286	64.1646	53.1387	44.3009	47.2028
288	Chr1:157882357-157883357	55.0187	-0.180866	0.257342	-0.702824	0.482165	0.999637	42	36	69	35	98	79	66.4411	58.9106	65.1082	45.3623	45.2238	49.0661
289	Chr1:157883110-157884110	45.9833	-0.217173	0.262046	-0.828758	0.407241	0.999637	34	24	57	31	93	74	53.7857	39.2738	53.785	40.178	42.9165	45.9606
290	Chr1:15795240-15796240	55.8718	-0.293347	0.266196	-1.10199	0.270465	0.999637	40	24	79	50	104	73	63.2773	39.2738	74.5441	64.8033	47.9926	45.3395
291	Chr1:158134656-158135656	41.9584	0.00371014	0.270918	0.0136947	0.989074	0.999637	20	28	47	31	103	68	31.6386	45.8194	44.349	40.178	47.5311	42.2341
292	Chr1:158240359-158241359	19.24	0.394658	0.428419	0.921196	0.356948	0.999637	7	9	21	14	42	52	11.0735	14.7277	19.8155	18.1449	19.3816	32.2967
293	Chr1:158295670-158296670	2.74387	1.49198	1.06126	1.40585	0.159768	0.999637	0	2	1	3	6	9	0	3.27281	0.943597	3.8882	2.7688	5.58981
294	Chr1:158329621-158330621	8.3961	0.528128	0.663103	0.79645	0.42577	0.999637	5	8	7	3	14	20	7.90966	13.0913	6.60518	3.8882	6.46054	12.4218
295	Chr1:158403959-158404959	35.4681	-0.349053	0.292444	-1.19357	0.232646	0.999637	21	20	49	27	83	44	33.2206	32.7281	46.2362	34.9938	38.3018	27.3279
296	Chr1:158488418-158489418	42.4398	0.0673592	0.268892	0.250507	0.802195	0.999637	30	24	43	30	84	80	47.4579	39.2738	40.5747	38.882	38.7633	49.6872
297	Chr1:158603987-158604987	45.0889	-0.0825417	0.264596	-0.311954	0.755076	0.999637	29	21	55	40	92	71	45.876	34.3645	51.8978	51.8426	42.455	44.0974
298	Chr1:158648632-158649632	54.2377	-0.134391	0.252214	-0.532844	0.594142	0.999637	39	39	61	37	109	71	61.6953	63.8199	57.5594	47.9544	50.3	44.0974
299	Chr1:158768194-158769194	9.31034	1.16973	0.669535	1.74708	0.0806226	0.999637	4	8	2	6	19	29	6.32773	13.0913	1.88719	7.7764	8.76788	18.0116
300	Chr1:15882303-15883303	37.3487	0.142291	0.28379	0.501396	0.616093	0.999637	19	19	44	35	76	66	30.0567	31.0917	41.5183	45.3623	35.0715	40.9919
301	Chr1:158869257-158870257	58.415	-0.473245	0.25815	-1.83322	0.0667702	0.999637	50	29	76	45	116	65	79.0966	47.4558	71.7133	58.323	53.5302	40.3708
302	Chr1:159038311-159039311	11.6458	0.877504	0.618937	1.41776	0.156261	0.999637	5	14	3	6	28	25	7.90966	22.9097	2.83079	7.7764	12.9211	15.5272
303	Chr1:159341984-159342984	57.2284	0.208589	0.257817	0.809059	0.418481	0.999637	25	35	68	60	115	83	39.5483	57.2742	64.1646	77.764	53.0688	51.5504
304	Chr1:159342226-159343226	50.0589	0.12033	0.26612	0.452166	0.65115	0.999637	26	26	56	55	105	71	41.1302	42.5466	52.8414	71.2836	48.4541	44.0974
305	Chr1:159388212-159389212	20.0554	-0.32846	0.40355	-0.813926	0.415687	0.999637	11	11	30	17	44	23	17.4012	18.0005	28.3079	22.0331	20.3046	14.2851
306	Chr1:159436360-159437360	6.69543	1.24497	0.750932	1.6579	0.0973383	0.999637	2	4	2	7	14	21	3.16386	6.54563	1.88719	9.07246	6.46054	13.0429
307	Chr1:160285891-160286891	28.635	0.22765	0.322873	0.705077	0.480763	0.999637	13	17	35	28	54	47	20.5651	27.8189	33.0259	36.2898	24.9192	29.1912
308	Chr1:160291972-160292972	17.7454	0.0557224	0.43022	0.129521	0.896946	0.999637	10	9	23	12	34	37	15.8193	14.7277	21.7027	15.5528	15.6899	22.9803
309	Chr1:16082906-16083906	21.4557	-0.00516231	0.397912	-0.0129735	0.989649	0.999637	13	15	15	12	63	40	20.5651	24.5461	14.1539	15.5528	29.0724	24.8436
310	Chr1:160887370-160888370	7.03698	0.28243	0.704849	0.400696	0.688644	0.999637	4	3	4	8	19	13	6.32773	4.90922	3.77439	10.3685	8.76788	8.07416
311	Chr1:160910121-160911121	10.7933	0.849124	0.629995	1.34782	0.177715	0.999637	4	13	4	5	26	24	6.32773	21.2733	3.77439	6.48033	11.9982	14.9061
312	Chr1:16094243-16095243	54.82	-0.163447	0.256203	-0.637958	0.523501	0.999637	33	34	76	43	106	72	52.2037	55.6378	71.7133	55.7308	48.9155	44.7184
313	Chr1:16095356-16096356	36.6387	-0.0768145	0.296425	-0.259136	0.79553	0.999637	18	15	50	31	82	67	28.4748	24.5461	47.1798	40.178	37.8403	41.613
314	Chr1:161098273-161099273	6.54312	0.309186	0.78095	0.39591	0.692171	0.999637	4	9	4	1	15	10	6.32773	14.7277	3.77439	1.29607	6.92201	6.21089
315	Chr1:161161958-161162958	22.1994	0.00807693	0.400307	0.0201768	0.983902	0.999637	9	11	29	27	50	25	14.2374	18.0005	27.3643	34.9938	23.0734	15.5272
316	Chr1:161544381-161545381	10.7649	0.879594	0.636209	1.38255	0.166802	0.999637	1	10	6	8	30	27	1.58193	16.3641	5.66158	10.3685	13.844	16.7694
317	Chr1:161667142-161668142	8.58675	0.633003	0.637799	0.992481	0.320963	0.999637	4	7	5	7	19	18	6.32773	11.4548	4.71798	9.07246	8.76788	11.1796
318	Chr1:161974016-161975016	23.958	0.149293	0.36381	0.410359	0.681543	0.999637	8	13	32	21	53	45	12.6555	21.2733	30.1951	27.2174	24.4578	27.949
319	Chr1:161974216-161975216	22.5332	0.0381288	0.37407	0.10193	0.918813	0.999637	9	11	30	18	52	44	14.2374	18.0005	28.3079	23.3292	23.9963	27.3279
320	Chr1:162007616-162008616	10.0088	0.366899	0.591965	0.619798	0.53539	0.999637	4	8	8	8	25	18	6.32773	13.0913	7.54877	10.3685	11.5367	11.1796
321	Chr1:162083211-162084211	9.14356	0.898128	0.716565	1.25338	0.210068	0.999637	2	12	2	6	27	16	3.16386	19.6369	1.88719	7.7764	12.4596	9.93743
322	Chr1:162124847-162125847	40.3056	-0.0402737	0.280486	-0.143585	0.885828	0.999637	27	22	49	37	74	56	42.7122	36.0009	46.2362	47.9544	34.1486	34.781
323	Chr1:162142408-162143408	50.3861	-0.0985236	0.279831	-0.352083	0.724776	0.999637	26	31	66	50	108	54	41.1302	50.7286	62.2774	64.8033	49.8385	33.5388
324	Chr1:162722569-162723569	37.8652	-0.276241	0.278661	-0.991316	0.321531	0.999637	27	20	47	26	83	57	42.7122	32.7281	44.349	33.6977	38.3018	35.4021
325	Chr1:162822752-162823752	8.03086	0.0137349	0.673556	0.0203916	0.983731	0.999637	5	4	9	3	18	21	7.90966	6.54563	8.49237	3.8882	8.30641	13.0429
326	Chr1:162836050-162837050	52.785	0.0776985	0.258208	0.300914	0.76348	0.999637	43	31	42	45	105	83	68.0231	50.7286	39.6311	58.323	48.4541	51.5504
327	Chr1:162908238-162909238	9.31197	0.698692	0.63427	1.10157	0.270649	0.999637	4	10	9	4	14	21	6.32773	16.3641	8.49237	5.18426	6.46054	13.0429
328	Chr1:162964480-162965480	52.6624	0.0323679	0.247241	0.130916	0.895842	0.999637	37	30	51	46	109	81	58.5315	49.0922	48.1234	59.619	50.3	50.3082
329	Chr1:163000289-163001289	56.5052	-0.208065	0.268543	-0.774792	0.438462	0.999637	39	25	79	53	101	75	61.6953	40.9102	74.5441	68.6915	46.6082	46.5817
330	Chr1:163000399-163001399	58.8226	-0.21375	0.265172	-0.806079	0.420197	0.999637	43	25	78	56	107	78	68.0231	40.9102	73.6005	72.5797	49.377	48.445
331	Chr1:163061142-163062142	50.2095	-0.159959	0.258538	-0.618704	0.536111	0.999637	29	29	70	39	101	72	45.876	47.4558	66.0518	50.5466	46.6082	44.7184
332	Chr1:163072323-163073323	20.7377	0.40085	0.390409	1.02674	0.304541	0.999637	13	17	14	14	43	40	20.5651	27.8189	13.2104	18.1449	19.8431	24.8436
333	Chr1:163180850-163181850	37.1588	0.0265609	0.288156	0.0921754	0.926559	0.999637	29	24	35	31	70	52	45.876	39.2738	33.0259	40.178	32.3027	32.2967
334	Chr1:163325082-163326082	9.58001	0.665953	0.721468	0.923053	0.35598	0.999637	3	10	1	6	33	20	4.74579	16.3641	0.943597	7.7764	15.2284	12.4218
335	Chr1:163424287-163425287	7.47235	-0.100288	0.763123	-0.131418	0.895445	0.999637	3	4	6	1	28	22	4.74579	6.54563	5.66158	1.29607	12.9211	13.664
336	Chr1:163718126-163719126	8.67091	-0.286252	0.700087	-0.408881	0.682627	0.999637	3	1	10	6	32	22	4.74579	1.63641	9.43597	7.7764	14.767	13.664
337	Chr1:163806292-163807292	42.6272	-0.440615	0.284986	-1.54609	0.122082	0.999637	29	16	47	40	121	51	45.876	26.1825	44.349	51.8426	55.8376	31.6756
338	Chr1:163898818-163899818	28.2522	-0.0548636	0.335578	-0.16349	0.870133	0.999637	13	16	33	29	70	35	20.5651	26.1825	31.1387	37.5859	32.3027	21.7381
339	Chr1:163909267-163910267	7.68462	0.67261	0.667972	1.00694	0.313962	0.999637	4	7	5	7	14	13	6.32773	11.4548	4.71798	9.07246	6.46054	8.07416
340	Chr1:164407312-164408312	34.6819	-0.326172	0.293423	-1.11161	0.266307	0.999637	19	17	44	25	94	53	30.0567	27.8189	41.5183	32.4016	43.3779	32.9177
341	Chr1:164407665-164408665	29.264	-0.276967	0.318711	-0.869022	0.384835	0.999637	18	12	36	21	75	51	28.4748	19.6369	33.9695	27.2174	34.6101	31.6756
342	Chr1:164478182-164479182	40.415	0.248259	0.287045	0.86488	0.387105	0.999637	18	29	47	41	77	54	28.4748	47.4558	44.349	53.1387	35.533	33.5388
343	Chr1:164500147-164501147	51.1441	-0.407769	0.260446	-1.56566	0.117428	0.999637	36	21	74	39	108	73	56.9495	34.3645	69.8261	50.5466	49.8385	45.3395
344	Chr1:164558614-164559614	7.72752	1.06227	0.707613	1.5012	0.133304	0.999637	1	7	5	5	17	23	1.58193	11.4548	4.71798	6.48033	7.84495	14.2851
345	Chr1:164568782-164569782	11.5489	0.326477	0.581438	0.561499	0.574457	0.999637	5	9	11	4	27	30	7.90966	14.7277	10.3796	5.18426	12.4596	18.6327
346	Chr1:164587804-164588804	9.65701	1.07181	0.639477	1.67607	0.0937249	0.999637	4	8	3	7	20	28	6.32773	13.0913	2.83079	9.07246	9.22935	17.3905
347	Chr1:164670181-164671181	42.4088	0.0733773	0.277232	0.264679	0.791257	0.999637	27	26	50	40	74	58	42.7122	42.5466	47.1798	51.8426	34.1486	36.0232
348	Chr1:164743603-164744603	9.53151	0.676217	0.626562	1.07925	0.280477	0.999637	6	11	7	6	13	15	9.49159	18.0005	6.60518	7.7764	5.99908	9.31634
349	Chr1:164796179-164797179	7.48759	0.0150747	0.686666	0.0219535	0.982485	0.999637	6	3	5	5	19	17	9.49159	4.90922	4.71798	6.48033	8.76788	10.5585
350	Chr1:164828357-164829357	8.47589	0.220376	0.692716	0.318133	0.750384	0.999637	6	6	2	5	26	18	9.49159	9.81844	1.88719	6.48033	11.9982	11.1796
351	Chr1:164914159-164915159	6.12203	0.420723	0.782067	0.537963	0.590603	0.999637	2	7	6	1	14	14	3.16386	11.4548	5.66158	1.29607	6.46054	8.69525
352	Chr1:165015301-165016301	7.0652	1.2977	0.719431	1.80378	0.0712659	0.999637	2	8	3	7	12	14	3.16386	13.0913	2.83079	9.07246	5.53761	8.69525
353	Chr1:16509693-16510693	19.7898	-0.545025	0.43125	-1.26383	0.206293	0.999637	21	5	20	11	46	37	33.2206	8.18203	18.8719	14.2567	21.2275	22.9803
354	Chr1:165243341-165244341	12.7034	0.242147	0.546101	0.44341	0.657469	0.999637	5	5	10	13	37	27	7.90966	8.18203	9.43597	16.8489	17.0743	16.7694
355	Chr1:165333272-165334272	46.4661	-0.415431	0.267776	-1.55142	0.120802	0.999637	32	27	68	30	96	59	50.6218	44.183	64.1646	38.882	44.3009	36.6443
356	Chr1:165654863-165655863	10.5459	0.451718	0.659899	0.684526	0.493643	0.999637	6	10	2	5	32	23	9.49159	16.3641	1.88719	6.48033	14.767	14.2851
357	Chr1:165709215-165710215	22.4113	-0.204892	0.377202	-0.543188	0.587	0.999637	13	7	30	20	52	39	20.5651	11.4548	28.3079	25.9213	23.9963	24.2225
358	Chr1:165858732-165859732	19.538	0.232136	0.406234	0.571435	0.567705	0.999637	11	11	25	17	30	36	17.4012	18.0005	23.5899	22.0331	13.844	22.3592
359	Chr1:165924427-165925427	60.6905	-0.165831	0.279629	-0.593041	0.553153	0.999637	36	33	95	55	99	75	56.9495	54.0014	89.6417	71.2836	45.6853	46.5817
360	Chr1:165924521-165925521	61.5081	-0.233356	0.288919	-0.807688	0.41927	0.999637	35	34	103	54	100	72	55.3676	55.6378	97.1905	69.9876	46.1467	44.7184
361	Chr1:165977866-165978866	8.74291	0.301599	0.648805	0.464853	0.642037	0.999637	7	5	4	6	20	20	11.0735	8.18203	3.77439	7.7764	9.22935	12.4218
362	Chr1:165991708-165992708	8.50041	-0.450738	0.646162	-0.697562	0.485451	0.999637	8	5	9	6	18	9	12.6555	8.18203	8.49237	7.7764	8.30641	5.58981
363	Chr1:166044896-166045896	8.19541	0.50496	0.663927	0.760566	0.446917	0.999637	5	6	4	5	19	20	7.90966	9.81844	3.77439	6.48033	8.76788	12.4218
364	Chr1:166081470-166082470	25.23	0.123923	0.365915	0.338667	0.734861	0.999637	18	20	17	12	61	49	28.4748	32.7281	16.0411	15.5528	28.1495	30.4334
365	Chr1:16609070-16610070	29.9819	-0.464491	0.318699	-1.45746	0.14499	0.999637	24	12	36	17	75	51	37.9664	19.6369	33.9695	22.0331	34.6101	31.6756
366	Chr1:166178678-166179678	55.4239	-0.151677	0.257368	-0.58934	0.555633	0.999637	37	26	70	53	110	74	58.5315	42.5466	66.0518	68.6915	50.7614	45.9606
367	Chr1:166205217-166206217	28.2657	-0.474627	0.331579	-1.43141	0.152312	0.999637	20	9	41	21	65	44	31.6386	14.7277	38.6875	27.2174	29.9954	27.3279
368	Chr1:166237120-166238120	57.0197	-0.090008	0.266423	-0.337839	0.735485	0.999637	41	31	69	56	101	68	64.8592	50.7286	65.1082	72.5797	46.6082	42.2341
369	Chr1:166242511-166243511	8.92988	-0.0580916	0.628327	-0.0924544	0.926337	0.999637	5	4	8	6	26	19	7.90966	6.54563	7.54877	7.7764	11.9982	11.8007
370	Chr1:166387986-166388986	55.5493	-0.240875	0.244927	-0.983459	0.325382	0.999637	44	28	60	43	121	80	69.605	45.8194	56.6158	55.7308	55.8376	49.6872
371	Chr1:16646446-16647446	64.2243	-0.24063	0.245335	-0.980824	0.32668	0.999637	46	31	81	57	130	83	72.7689	50.7286	76.4313	73.8758	59.9908	51.5504
372	Chr1:16654789-16655789	33.8425	-0.300422	0.294617	-1.0197	0.307869	0.999637	27	20	36	21	78	49	42.7122	32.7281	33.9695	27.2174	35.9945	30.4334
373	Chr1:166726364-166727364	9.89833	0.475987	0.648474	0.734011	0.462942	0.999637	5	9	5	3	26	26	7.90966	14.7277	4.71798	3.8882	11.9982	16.1483
374	Chr1:16678038-16679038	22.1918	-0.131275	0.372881	-0.352057	0.724796	0.999637	12	17	24	14	57	31	18.9832	27.8189	22.6463	18.1449	26.3036	19.2538
375	Chr1:166865158-166866158	7.43457	0.706853	0.713668	0.990451	0.321954	0.999637	2	7	4	4	20	19	3.16386	11.4548	3.77439	5.18426	9.22935	11.8007
376	Chr1:167090404-167091404	7.57955	0.709346	0.706599	1.00389	0.315433	0.999637	4	6	4	3	16	23	6.32773	9.81844	3.77439	3.8882	7.38348	14.2851
377	Chr1:167124064-167125064	51.7788	-0.044625	0.275214	-0.162146	0.871191	0.999637	28	26	69	55	102	65	44.2941	42.5466	65.1082	71.2836	47.0697	40.3708
378	Chr1:167166574-167167574	49.1975	-0.113077	0.266674	-0.424027	0.671546	0.999637	29	29	69	41	91	67	45.876	47.4558	65.1082	53.1387	41.9935	41.613
379	Chr1:167232257-167233257	10.393	0.807258	0.660691	1.22184	0.221768	0.999637	3	8	2	10	32	24	4.74579	13.0913	1.88719	12.9607	14.767	14.9061
380	Chr1:167390096-167391096	56.0472	-0.037348	0.249332	-0.149792	0.880929	0.999637	39	29	57	54	119	78	61.6953	47.4558	53.785	69.9876	54.9146	48.445
381	Chr1:167390669-167391669	49.6586	0.115835	0.278096	0.41653	0.677022	0.999637	33	25	49	58	96	63	52.2037	40.9102	46.2362	75.1718	44.3009	39.1286
382	Chr1:167414815-167415815	8.80827	0.846199	0.673304	1.25679	0.208831	0.999637	5	8	3	4	18	25	7.90966	13.0913	2.83079	5.18426	8.30641	15.5272
383	Chr1:167564172-167565172	42.0221	-0.109683	0.267557	-0.409943	0.681848	0.999637	30	23	48	33	85	64	47.4579	37.6374	45.2926	42.7702	39.2247	39.7497
384	Chr1:167637725-167638725	30.0428	-0.268294	0.35621	-0.753191	0.451335	0.999637	18	7	41	36	68	38	28.4748	11.4548	38.6875	46.6584	31.3798	23.6014
385	Chr1:167693378-167694378	35.0776	-0.151148	0.295656	-0.511228	0.609191	0.999637	23	22	45	28	68	45	36.3844	36.0009	42.4618	36.2898	31.3798	27.949
386	Chr1:167718313-167719313	14.0558	0.386991	0.507799	0.762095	0.446004	0.999637	4	13	15	9	32	26	6.32773	21.2733	14.1539	11.6646	14.767	16.1483
387	Chr1:167932309-167933309	39.6028	0.255196	0.286902	0.88949	0.37374	0.999637	20	28	43	41	74	52	31.6386	45.8194	40.5747	53.1387	34.1486	32.2967
388	Chr1:168057529-168058529	22.0215	-0.0326481	0.436397	-0.0748129	0.940364	0.999637	22	7	23	26	27	29	34.8025	11.4548	21.7027	33.6977	12.4596	18.0116
389	Chr1:168059870-168060870	25.3734	0.191171	0.384096	0.497718	0.618683	0.999637	23	18	22	25	33	29	36.3844	29.4553	20.7591	32.4016	15.2284	18.0116
390	Chr1:168168375-168169375	15.2988	0.0429135	0.462338	0.0928186	0.926048	0.999637	10	8	17	13	30	26	15.8193	13.0913	16.0411	16.8489	13.844	16.1483
391	Chr1:168183771-168184771	24.4268	0.153971	0.351002	0.438662	0.660907	0.999637	13	13	31	21	44	45	20.5651	21.2733	29.2515	27.2174	20.3046	27.949
392	Chr1:168239216-168240216	23.1995	0.0387154	0.353848	0.109413	0.912875	0.999637	14	14	24	17	52	41	22.147	22.9097	22.6463	22.0331	23.9963	25.4647
393	Chr1:168308729-168309729	31.5863	-0.270996	0.325417	-0.832765	0.404977	0.999637	17	20	52	18	60	48	26.8928	32.7281	49.067	23.3292	27.688	29.8123
394	Chr1:168339494-168340494	19.1878	-0.0272336	0.415257	-0.0655825	0.94771	0.999637	12	8	26	14	35	39	18.9832	13.0913	24.5335	18.1449	16.1514	24.2225
395	Chr1:168427219-168428219	5.95428	0.873557	0.765272	1.1415	0.253663	0.999637	2	5	4	3	12	18	3.16386	8.18203	3.77439	3.8882	5.53761	11.1796
396	Chr1:168577324-168578324	7.65834	0.711569	0.720511	0.987589	0.323354	0.999637	2	6	3	5	23	21	3.16386	9.81844	2.83079	6.48033	10.6138	13.0429
397	Chr1:168611476-168612476	6.21298	0.448952	0.793266	0.565954	0.571425	0.999637	2	8	3	2	19	11	3.16386	13.0913	2.83079	2.59213	8.76788	6.83198
398	Chr1:168931049-168932049	40.7705	-0.0911903	0.268193	-0.340017	0.733843	0.999637	25	24	44	32	96	62	39.5483	39.2738	41.5183	41.4741	44.3009	38.5075
399	Chr1:169153550-169154550	11.2926	0.312596	0.569718	0.548686	0.583221	0.999637	5	8	7	10	32	20	7.90966	13.0913	6.60518	12.9607	14.767	12.4218
400	Chr1:169214758-169215758	45.722	-0.133746	0.279818	-0.477975	0.632668	0.999637	31	29	55	42	89	49	49.0399	47.4558	51.8978	54.4348	41.0706	30.4334
401	Chr1:169238302-169239302	59.3811	-0.257681	0.248994	-1.03489	0.30072	0.999637	47	34	70	47	117	73	74.3508	55.6378	66.0518	60.9151	53.9917	45.3395
402	Chr1:169279623-169280623	35.3522	0.0638646	0.293047	0.217933	0.827481	0.999637	19	19	44	34	69	54	30.0567	31.0917	41.5183	44.0662	31.8413	33.5388
403	Chr1:169323472-169324472	57.8226	-0.0526573	0.256509	-0.205284	0.83735	0.999637	44	34	67	50	98	78	69.605	55.6378	63.221	64.8033	45.2238	48.445
404	Chr1:169396411-169397411	12.1547	0.26269	0.575193	0.456699	0.647888	0.999637	8	11	11	3	23	28	12.6555	18.0005	10.3796	3.8882	10.6138	17.3905
405	Chr1:169528016-169529016	23.7011	0.451397	0.363618	1.2414	0.214456	0.999637	10	14	18	22	57	51	15.8193	22.9097	16.9847	28.5135	26.3036	31.6756
406	Chr1:169618871-169619871	35.2599	-0.0624717	0.294913	-0.21183	0.832239	0.999637	29	22	32	28	71	49	45.876	36.0009	30.1951	36.2898	32.7642	30.4334
407	Chr1:170361901-170362901	21.392	-0.406852	0.395165	-1.02957	0.30321	0.999637	11	11	35	18	47	24	17.4012	18.0005	33.0259	23.3292	21.689	14.9061
408	Chr1:17087379-17088379	33.4707	-0.232629	0.300801	-0.773366	0.439306	0.999637	22	13	38	25	85	60	34.8025	21.2733	35.8567	32.4016	39.2247	37.2654
409	Chr1:17134944-17135944	18.8014	0.255167	0.443976	0.574732	0.565472	0.999637	9	13	20	7	41	49	14.2374	21.2733	18.8719	9.07246	18.9202	30.4334
410	Chr1:171461095-171462095	48.1323	-0.21398	0.294629	-0.72627	0.467673	0.999637	38	30	66	39	72	54	60.1134	49.0922	62.2774	50.5466	33.2257	33.5388
411	Chr1:171585133-171586133	9.42504	0.616032	0.614164	1.00304	0.315841	0.999637	5	8	5	9	20	16	7.90966	13.0913	4.71798	11.6646	9.22935	9.93743
412	Chr1:171677273-171678273	13.5343	0.0223901	0.546886	0.040941	0.967343	0.999637	8	5	7	13	45	26	12.6555	8.18203	6.60518	16.8489	20.766	16.1483
413	Chr1:171858280-171859280	12.6242	0.445879	0.524035	0.850857	0.394849	0.999637	7	8	12	14	21	20	11.0735	13.0913	11.3232	18.1449	9.69082	12.4218
414	Chr1:171898872-171899872	38.0468	-0.0190844	0.306774	-0.0622099	0.950396	0.999637	22	17	48	44	74	47	34.8025	27.8189	45.2926	57.0269	34.1486	29.1912
415	Chr1:172040132-172041132	16.5414	0.754392	0.462556	1.63092	0.102907	0.999637	3	13	17	15	32	37	4.74579	21.2733	16.0411	19.441	14.767	22.9803
416	Chr1:172104588-172105588	38.4064	-0.463479	0.287987	-1.60937	0.107535	0.999637	22	17	60	28	91	53	34.8025	27.8189	56.6158	36.2898	41.9935	32.9177
417	Chr1:172144492-172145492	47.9701	0.146274	0.263877	0.554325	0.579356	0.999637	25	32	56	46	92	66	39.5483	52.365	52.8414	59.619	42.455	40.9919
418	Chr1:172145028-172146028	40.0973	0.070267	0.282526	0.24871	0.803585	0.999637	24	28	48	35	72	53	37.9664	45.8194	45.2926	45.3623	33.2257	32.9177
419	Chr1:172162381-172163381	7.97383	0.623518	0.692782	0.90002	0.36811	0.999637	4	8	3	4	20	18	6.32773	13.0913	2.83079	5.18426	9.22935	11.1796
420	Chr1:172207008-172208008	5.09777	0.198205	0.852288	0.232556	0.816106	0.999637	3	4	1	2	18	12	4.74579	6.54563	0.943597	2.59213	8.30641	7.45307
421	Chr1:172232458-172233458	6.96071	0.433683	0.740532	0.585637	0.558119	0.999637	1	6	11	3	12	17	1.58193	9.81844	10.3796	3.8882	5.53761	10.5585
422	Chr1:172238435-172239435	5.93003	0.947203	0.842918	1.12372	0.261132	0.999637	3	10	2	1	11	10	4.74579	16.3641	1.88719	1.29607	5.07614	6.21089
423	Chr1:172519492-172520492	42.724	-0.0458676	0.264221	-0.173596	0.862183	0.999637	25	25	45	35	102	66	39.5483	40.9102	42.4618	45.3623	47.0697	40.9919
424	Chr1:172574164-172575164	28.5896	0.0900291	0.356362	0.252634	0.800551	0.999637	7	14	36	24	79	58	11.0735	22.9097	33.9695	31.1056	36.4559	36.0232
425	Chr1:172797402-172798402	48.9367	-0.32435	0.273584	-1.18556	0.235798	0.999637	27	28	70	42	112	53	42.7122	45.8194	66.0518	54.4348	51.6844	32.9177
426	Chr1:172815171-172816171	34.1959	0.0634891	0.300146	0.211527	0.832476	0.999637	21	20	42	32	60	49	33.2206	32.7281	39.6311	41.4741	27.688	30.4334
427	Chr1:172842572-172843572	8.46268	0.272204	0.632462	0.430388	0.666914	0.999637	5	4	8	8	17	17	7.90966	6.54563	7.54877	10.3685	7.84495	10.5585
428	Chr1:172857214-172858214	7.49024	0.494907	0.717164	0.690089	0.490138	0.999637	1	5	6	5	23	20	1.58193	8.18203	5.66158	6.48033	10.6138	12.4218
429	Chr1:172906178-172907178	7.19025	-0.165748	0.693945	-0.238849	0.811222	0.999637	7	3	7	5	13	13	11.0735	4.90922	6.60518	6.48033	5.99908	8.07416
430	Chr1:172948552-172949552	9.69102	0.662373	0.609602	1.08657	0.277229	0.999637	5	8	5	7	21	22	7.90966	13.0913	4.71798	9.07246	9.69082	13.664
431	Chr1:172994566-172995566	16.4659	0.0409134	0.471681	0.0867396	0.930878	0.999637	10	10	23	17	24	19	15.8193	16.3641	21.7027	22.0331	11.0752	11.8007
432	Chr1:173043550-173044550	28.0668	-0.534765	0.335198	-1.59537	0.11063	0.999637	24	11	40	19	56	39	37.9664	18.0005	37.7439	24.6253	25.8422	24.2225
433	Chr1:173080234-173081234	46.3116	-0.0720113	0.270996	-0.265728	0.790449	0.999637	31	22	60	42	83	70	49.0399	36.0009	56.6158	54.4348	38.3018	43.4763
434	Chr1:173080343-173081343	41.0789	-0.101914	0.28504	-0.357542	0.720686	0.999637	29	19	54	36	71	63	45.876	31.0917	50.9542	46.6584	32.7642	39.1286
435	Chr1:173125899-173126899	33.0316	0.110333	0.313409	0.352042	0.724807	0.999637	15	17	29	31	92	59	23.729	27.8189	27.3643	40.178	42.455	36.6443
436	Chr1:173143602-173144602	7.92063	-0.00888998	0.689486	-0.0128936	0.989713	0.999637	6	6	4	3	23	16	9.49159	9.81844	3.77439	3.8882	10.6138	9.93743
437	Chr1:173152145-173153145	29.5777	-0.4935	0.355268	-1.38909	0.164805	0.999637	19	12	52	27	53	31	30.0567	19.6369	49.067	34.9938	24.4578	19.2538
438	Chr1:173154686-173155686	9.01531	0.462018	0.67715	0.682297	0.495051	0.999637	7	6	4	3	19	27	11.0735	9.81844	3.77439	3.8882	8.76788	16.7694
439	Chr1:173163996-173164996	13.0923	0.275278	0.540489	0.509312	0.610533	0.999637	8	8	8	7	34	33	12.6555	13.0913	7.54877	9.07246	15.6899	20.496
440	Chr1:173176753-173177753	55.4762	-0.387029	0.263719	-1.46758	0.142218	0.999637	42	25	78	47	107	67	66.4411	40.9102	73.6005	60.9151	49.377	41.613
441	Chr1:173180053-173181053	10.5462	0.570746	0.62958	0.906551	0.364645	0.999637	3	10	5	6	32	24	4.74579	16.3641	4.71798	7.7764	14.767	14.9061
442	Chr1:173199960-173200960	46.3017	-0.215905	0.264748	-0.81551	0.414781	0.999637	27	24	66	34	97	72	42.7122	39.2738	62.2774	44.0662	44.7623	44.7184
443	Chr1:173210817-173211817	41.6705	-0.424354	0.275096	-1.54256	0.122937	0.999637	26	17	59	33	101	58	41.1302	27.8189	55.6722	42.7702	46.6082	36.0232
444	Chr1:173217622-173218622	37.4751	-0.0236941	0.295344	-0.0802253	0.936058	0.999637	20	17	49	39	76	54	31.6386	27.8189	46.2362	50.5466	35.0715	33.5388
445	Chr1:173224655-173225655	42.5529	-0.323085	0.282927	-1.14194	0.253481	0.999637	35	29	52	27	81	50	55.3676	47.4558	49.067	34.9938	37.3789	31.0545
446	Chr1:173235125-173236125	1.91319	-0.636858	1.17178	-0.543496	0.586789	0.999637	2	1	2	0	5	4	3.16386	1.63641	1.88719	0	2.30734	2.48436
447	Chr1:173258777-173259777	63.2286	-0.218901	0.289407	-0.756376	0.449424	0.999637	50	31	78	67	111	61	79.0966	50.7286	73.6005	86.8364	51.2229	37.8865
448	Chr1:173275277-173276277	61.5226	-0.342646	0.246109	-1.39226	0.163845	0.999637	46	28	77	53	133	77	72.7689	45.8194	72.6569	68.6915	61.3752	47.8239
449	Chr1:173275302-173276302	62.0021	-0.326532	0.247155	-1.32116	0.186446	0.999637	45	28	78	55	135	77	71.1869	45.8194	73.6005	71.2836	62.2981	47.8239
450	Chr1:173290429-173291429	31.3845	-0.183538	0.31991	-0.573718	0.566158	0.999637	16	15	37	32	82	39	25.3109	24.5461	34.9131	41.4741	37.8403	24.2225
451	Chr1:173299731-173300731	13.6788	0.359309	0.531343	0.676229	0.498895	0.999637	7	7	12	7	31	40	11.0735	11.4548	11.3232	9.07246	14.3055	24.8436
452	Chr1:173318586-173319586	17.3711	-0.250167	0.432882	-0.57791	0.563325	0.999637	13	10	16	10	46	29	20.5651	16.3641	15.0975	12.9607	21.2275	18.0116
453	Chr1:173340945-173341945	45.1293	-0.0484004	0.2762	-0.175237	0.860893	0.999637	24	27	61	42	88	58	37.9664	44.183	57.5594	54.4348	40.6091	36.0232
454	Chr1:173348665-173349665	15.5257	0.204869	0.47994	0.426864	0.669478	0.999637	11	5	12	15	34	34	17.4012	8.18203	11.3232	19.441	15.6899	21.117
455	Chr1:173367167-173368167	40.5673	-0.113744	0.292543	-0.388811	0.697416	0.999637	19	17	58	40	89	61	30.0567	27.8189	54.7286	51.8426	41.0706	37.8865
456	Chr1:173433110-173434110	33.0417	0.0586803	0.305642	0.19199	0.84775	0.999637	26	20	31	30	60	46	41.1302	32.7281	29.2515	38.882	27.688	28.5701
457	Chr1:173433742-173434742	53.0118	-0.0502295	0.26099	-0.192457	0.847384	0.999637	42	30	60	44	89	77	66.4411	49.0922	56.6158	57.0269	41.0706	47.8239
458	Chr1:173444865-173445865	33.2181	0.0758286	0.322753	0.234943	0.814253	0.999637	18	18	28	20	92	75	28.4748	29.4553	26.4207	25.9213	42.455	46.5817
459	Chr1:173464925-173465925	20.2563	0.275199	0.752538	0.365695	0.714593	0.999637	17	21	9	5	43	41	26.8928	34.3645	8.49237	6.48033	19.8431	25.4647
460	Chr1:173488825-173489825	30.2359	0.150727	0.335023	0.449901	0.652782	0.999637	21	24	24	13	67	62	33.2206	39.2738	22.6463	16.8489	30.9183	38.5075
461	Chr1:173537041-173538041	5.58797	0.825736	0.792762	1.04159	0.2976	0.999637	4	6	2	3	9	12	6.32773	9.81844	1.88719	3.8882	4.15321	7.45307
462	Chr1:173578649-173579649	8.40063	0.0389484	0.655928	0.059379	0.95265	0.999637	5	8	10	3	16	14	7.90966	13.0913	9.43597	3.8882	7.38348	8.69525
463	Chr1:173611641-173612641	7.00852	1.33627	0.79555	1.67968	0.0930199	0.999637	3	9	1	2	13	21	4.74579	14.7277	0.943597	2.59213	5.99908	13.0429
464	Chr1:173696759-173697759	8.1548	0.925468	0.724523	1.27735	0.201479	0.999637	4	10	1	7	19	12	6.32773	16.3641	0.943597	9.07246	8.76788	7.45307
465	Chr1:173769329-173770329	7.18192	0.927254	0.735993	1.25987	0.207717	0.999637	1	6	3	7	20	17	1.58193	9.81844	2.83079	9.07246	9.22935	10.5585
466	Chr1:173825296-173826296	6.26493	0.540013	0.76146	0.70918	0.478213	0.999637	1	5	4	7	19	10	1.58193	8.18203	3.77439	9.07246	8.76788	6.21089
467	Chr1:173847147-173848147	12.1692	-0.199274	0.606088	-0.328787	0.742317	0.999637	8	10	12	1	33	26	12.6555	16.3641	11.3232	1.29607	15.2284	16.1483
468	Chr1:173958075-173959075	10.0785	-0.104874	0.600888	-0.174532	0.861447	0.999637	5	5	8	9	33	16	7.90966	8.18203	7.54877	11.6646	15.2284	9.93743
469	Chr1:173987204-173988204	7.57057	0.717862	0.728078	0.985969	0.324148	0.999637	4	6	4	2	16	25	6.32773	9.81844	3.77439	2.59213	7.38348	15.5272
470	Chr1:174012161-174013161	51.1957	-0.254807	0.270898	-0.9406	0.34691	0.999637	30	25	75	47	104	63	47.4579	40.9102	70.7697	60.9151	47.9926	39.1286
471	Chr1:174012426-174013426	57.5647	-0.255965	0.26497	-0.966013	0.334038	0.999637	36	25	82	55	116	73	56.9495	40.9102	77.3749	71.2836	53.5302	45.3395
472	Chr1:174056387-174057387	52.1479	-0.0615386	0.275652	-0.223248	0.823343	0.999637	28	24	70	56	105	68	44.2941	39.2738	66.0518	72.5797	48.4541	42.2341
473	Chr1:174077647-174078647	39.0365	-0.381536	0.284594	-1.34063	0.18004	0.999637	31	19	50	31	80	48	49.0399	31.0917	47.1798	40.178	36.9174	29.8123
474	Chr1:174136435-174137435	27.5472	-0.334339	0.325687	-1.02656	0.304626	0.999637	17	14	38	19	64	41	26.8928	22.9097	35.8567	24.6253	29.5339	25.4647
475	Chr1:174149526-174150526	10.3509	0.653332	0.613955	1.06414	0.287267	0.999637	2	8	8	7	27	27	3.16386	13.0913	7.54877	9.07246	12.4596	16.7694
476	Chr1:174188045-174189045	10.4332	0.125083	0.603502	0.207262	0.835805	0.999637	3	9	11	5	30	20	4.74579	14.7277	10.3796	6.48033	13.844	12.4218
477	Chr1:174191273-174192273	10.2931	-0.0258377	0.60502	-0.0427055	0.965936	0.999637	7	8	7	4	29	20	11.0735	13.0913	6.60518	5.18426	13.3826	12.4218
478	Chr1:174227695-174228695	12.9212	-0.145176	0.555039	-0.26156	0.793661	0.999637	6	7	10	14	44	14	9.49159	11.4548	9.43597	18.1449	20.3046	8.69525
479	Chr1:174258894-174259894	9.22395	0.530046	0.767396	0.690708	0.489749	0.999637	5	7	2	1	28	32	7.90966	11.4548	1.88719	1.29607	12.9211	19.8749
480	Chr1:174270842-174271842	31.6808	-0.0582596	0.317226	-0.183653	0.854285	0.999637	21	11	33	34	72	49	33.2206	18.0005	31.1387	44.0662	33.2257	30.4334
481	Chr1:174306163-174307163	44.9356	0.141237	0.307848	0.458789	0.646386	0.999637	23	26	58	54	77	49	36.3844	42.5466	54.7286	69.9876	35.533	30.4334
482	Chr1:174404990-174405990	14.7835	0.674786	0.519549	1.29879	0.194015	0.999637	11	12	5	9	28	36	17.4012	19.6369	4.71798	11.6646	12.9211	22.3592
483	Chr1:174411420-174412420	28.1704	-0.0570717	0.322578	-0.176924	0.859568	0.999637	17	14	36	22	57	49	26.8928	22.9097	33.9695	28.5135	26.3036	30.4334
484	Chr1:174429679-174430679	37.9488	-0.119753	0.28789	-0.415968	0.677433	0.999637	24	27	48	28	74	48	37.9664	44.183	45.2926	36.2898	34.1486	29.8123
485	Chr1:174450676-174451676	26.4495	-0.379323	0.336529	-1.12716	0.259674	0.999637	20	14	35	19	55	34	31.6386	22.9097	33.0259	24.6253	25.3807	21.117
486	Chr1:174485570-174486570	12.7735	0.0700919	0.527181	0.132956	0.894228	0.999637	6	11	13	7	32	21	9.49159	18.0005	12.2668	9.07246	14.767	13.0429
487	Chr1:174520199-174521199	11.3088	0.610843	0.587515	1.03971	0.298476	0.999637	4	12	6	9	29	18	6.32773	19.6369	5.66158	11.6646	13.3826	11.1796
488	Chr1:174532182-174533182	9.33718	0.638857	0.717053	0.890949	0.372957	0.999637	8	11	2	2	17	21	12.6555	18.0005	1.88719	2.59213	7.84495	13.0429
489	Chr1:174562605-174563605	30.626	-0.492147	0.321394	-1.53129	0.125698	0.999637	26	11	32	27	79	37	41.1302	18.0005	30.1951	34.9938	36.4559	22.9803
490	Chr1:174627688-174628688	6.946	0.659934	0.784244	0.84149	0.400073	0.999637	3	8	1	3	21	15	4.74579	13.0913	0.943597	3.8882	9.69082	9.31634
491	Chr1:174824685-174825685	7.21025	0.999235	0.728962	1.37076	0.170448	0.999637	2	8	4	3	15	20	3.16386	13.0913	3.77439	3.8882	6.92201	12.4218
492	Chr1:174886400-174887400	9.46934	0.57641	0.636511	0.905578	0.365159	0.999637	3	9	6	5	25	22	4.74579	14.7277	5.66158	6.48033	11.5367	13.664
493	Chr1:175060867-175061867	5.09624	1.10973	0.860438	1.28973	0.197144	0.999637	0	6	4	2	11	15	0	9.81844	3.77439	2.59213	5.07614	9.31634
494	Chr1:175114135-175115135	4.7486	-0.022448	0.823252	-0.0272675	0.978246	0.999637	3	2	3	3	15	11	4.74579	3.27281	2.83079	3.8882	6.92201	6.83198
495	Chr1:175132990-175133990	8.44836	0.456894	0.671385	0.680524	0.496173	0.999637	5	4	3	8	23	20	7.90966	6.54563	2.83079	10.3685	10.6138	12.4218
496	Chr1:175145239-175146239	5.23959	0.653833	0.816306	0.800966	0.423151	0.999637	2	2	4	3	12	19	3.16386	3.27281	3.77439	3.8882	5.53761	11.8007
497	Chr1:175156860-175157860	8.74351	0.326419	0.672959	0.485051	0.62764	0.999637	3	8	5	4	28	19	4.74579	13.0913	4.71798	5.18426	12.9211	11.8007
498	Chr1:175199779-175200779	8.9553	0.258112	0.663276	0.389147	0.697167	0.999637	4	3	8	5	24	28	6.32773	4.90922	7.54877	6.48033	11.0752	17.3905
499	Chr1:175207353-175208353	8.86823	1.02314	0.653249	1.56623	0.117295	0.999637	5	9	3	6	15	21	7.90966	14.7277	2.83079	7.7764	6.92201	13.0429
500	Chr1:175263134-175264134	7.1878	0.296749	0.717641	0.413507	0.679235	0.999637	5	3	4	4	18	21	7.90966	4.90922	3.77439	5.18426	8.30641	13.0429
501	Chr1:175280511-175281511	8.17797	0.514107	0.682286	0.753506	0.451146	0.999637	1	4	10	7	19	22	1.58193	6.54563	9.43597	9.07246	8.76788	13.664
502	Chr1:175297326-175298326	25.5129	-0.20576	0.360484	-0.570787	0.568144	0.999637	13	7	33	23	67	47	20.5651	11.4548	31.1387	29.8095	30.9183	29.1912
503	Chr1:175465588-175466588	3.81836	1.25759	0.940318	1.33741	0.181089	0.999637	1	2	1	7	8	7	1.58193	3.27281	0.943597	9.07246	3.69174	4.34763
504	Chr1:175528905-175529905	6.65768	0.304576	0.719242	0.423468	0.671954	0.999637	5	6	5	3	12	13	7.90966	9.81844	4.71798	3.8882	5.53761	8.07416
505	Chr1:175603543-175604543	4.82373	0.174801	0.858619	0.203583	0.838679	0.999637	6	3	2	2	7	11	9.49159	4.90922	1.88719	2.59213	3.23027	6.83198
506	Chr1:175671378-175672378	3.84815	0.354831	0.91693	0.386977	0.698773	0.999637	3	1	2	2	9	13	4.74579	1.63641	1.88719	2.59213	4.15321	8.07416
507	Chr1:175696550-175697550	4.41034	0.328079	0.877371	0.373935	0.708453	0.999637	4	4	4	1	5	10	6.32773	6.54563	3.77439	1.29607	2.30734	6.21089
508	Chr1:175842553-175843553	8.4394	0.980681	0.654563	1.49822	0.134075	0.999637	2	7	7	11	14	14	3.16386	11.4548	6.60518	14.2567	6.46054	8.69525
509	Chr1:175872122-175873122	4.11315	0.638102	1.73821	0.367103	0.713542	0.999637	0	6	2	0	16	9	0	9.81844	1.88719	0	7.38348	5.58981
510	Chr1:175872303-175873303	4.25577	0.602999	1.80842	0.333439	0.738803	0.999637	0	7	2	0	17	7	0	11.4548	1.88719	0	7.84495	4.34763
511	Chr1:175912475-175913475	7.20704	0.600467	0.723807	0.829594	0.406768	0.999637	1	7	5	5	21	15	1.58193	11.4548	4.71798	6.48033	9.69082	9.31634
512	Chr1:17591483-17592483	5.49738	0.750825	0.784758	0.95676	0.338688	0.999637	3	3	2	7	12	11	4.74579	4.90922	1.88719	9.07246	5.53761	6.83198
513	Chr1:175961386-175962386	6.82492	1.4365	0.754639	1.90356	0.0569671	0.999637	3	8	1	6	11	15	4.74579	13.0913	0.943597	7.7764	5.07614	9.31634
514	Chr1:175971565-175972565	5.9891	0.347805	0.751648	0.462723	0.643563	0.999637	3	3	4	4	16	16	4.74579	4.90922	3.77439	5.18426	7.38348	9.93743
515	Chr1:175980007-175981007	6.43118	1.2277	0.739195	1.66086	0.0967409	0.999637	3	6	3	5	9	17	4.74579	9.81844	2.83079	6.48033	4.15321	10.5585
516	Chr1:175998932-175999932	6.04359	0.37885	0.73929	0.512452	0.608335	0.999637	3	5	4	4	15	12	4.74579	8.18203	3.77439	5.18426	6.92201	7.45307
517	Chr1:176018670-176019670	7.678	0.844644	0.749944	1.12628	0.260049	0.999637	2	10	2	4	22	15	3.16386	16.3641	1.88719	5.18426	10.1523	9.31634
518	Chr1:176029092-176030092	4.92983	0.478565	0.833989	0.573827	0.566085	0.999637	3	2	5	2	8	17	4.74579	3.27281	4.71798	2.59213	3.69174	10.5585
519	Chr1:176047645-176048645	7.27133	0.823112	0.738983	1.11384	0.265346	0.999637	5	6	2	3	14	22	7.90966	9.81844	1.88719	3.8882	6.46054	13.664
520	Chr1:176066378-176067378	3.28528	1.30837	1.05705	1.23776	0.215804	0.999637	0	1	3	1	6	18	0	1.63641	2.83079	1.29607	2.7688	11.1796
521	Chr1:176081113-176082113	8.59955	0.515813	0.673147	0.76627	0.443515	0.999637	3	9	6	3	22	20	4.74579	14.7277	5.66158	3.8882	10.1523	12.4218
522	Chr1:176088354-176089354	6.38641	1.3708	0.749995	1.82774	0.0675885	0.999637	3	6	2	6	9	16	4.74579	9.81844	1.88719	7.7764	4.15321	9.93743
523	Chr1:176102408-176103408	5.5381	0.276707	0.772783	0.358065	0.720295	0.999637	3	5	5	2	12	12	4.74579	8.18203	4.71798	2.59213	5.53761	7.45307
524	Chr1:176180607-176181607	6.85822	-0.00199358	0.742499	-0.00268496	0.997858	0.999754	3	7	4	3	24	10	4.74579	11.4548	3.77439	3.8882	11.0752	6.21089
525	Chr1:176260150-176261150	1.84117	-0.345665	1.20508	-0.286841	0.774234	0.999637	1	0	2	0	7	7	1.58193	0	1.88719	0	3.23027	4.34763
526	Chr1:176298551-176299551	5.83213	1.21024	0.817447	1.48051	0.138736	0.999637	2	6	1	3	13	18	3.16386	9.81844	0.943597	3.8882	5.99908	11.1796
527	Chr1:176320678-176321678	5.00728	0.883701	0.802962	1.10055	0.271092	0.999637	3	4	3	5	7	10	4.74579	6.54563	2.83079	6.48033	3.23027	6.21089
528	Chr1:176360062-176361062	7.6751	0.981404	0.676575	1.45055	0.146906	0.999637	4	7	4	6	12	18	6.32773	11.4548	3.77439	7.7764	5.53761	11.1796
529	Chr1:176378257-176379257	9.31562	0.847717	0.637482	1.32979	0.183588	0.999637	4	10	4	6	20	20	6.32773	16.3641	3.77439	7.7764	9.22935	12.4218
530	Chr1:176431457-176432457	34.5946	-0.118621	0.292656	-0.405326	0.685238	0.999637	23	16	38	32	78	51	36.3844	26.1825	35.8567	41.4741	35.9945	31.6756
531	Chr1:176851450-176852450	18.461	-0.021699	0.409885	-0.0529393	0.95778	0.999637	13	11	17	14	42	30	20.5651	18.0005	16.0411	18.1449	19.3816	18.6327
532	Chr1:17716627-17717627	15.713	-0.286632	0.485864	-0.589942	0.555229	0.999637	8	8	20	6	45	34	12.6555	13.0913	18.8719	7.7764	20.766	21.117
533	Chr1:177420761-177421761	4.74391	0.499324	0.849574	0.587735	0.55671	0.999637	2	5	3	1	12	12	3.16386	8.18203	2.83079	1.29607	5.53761	7.45307
534	Chr1:177550013-177551013	7.68207	0.845657	0.72761	1.16224	0.245138	0.999637	1	6	4	5	22	23	1.58193	9.81844	3.77439	6.48033	10.1523	14.2851
535	Chr1:177555266-177556266	39.0441	0.11581	0.277117	0.417911	0.676012	0.999637	23	28	43	32	75	57	36.3844	45.8194	40.5747	41.4741	34.6101	35.4021
536	Chr1:177617984-177618984	7.68482	0.52064	0.672037	0.774718	0.438506	0.999637	4	7	6	4	15	17	6.32773	11.4548	5.66158	5.18426	6.92201	10.5585
537	Chr1:177622407-177623407	29.5654	-0.278906	0.311516	-0.895319	0.370617	0.999637	21	15	35	22	68	43	33.2206	24.5461	33.0259	28.5135	31.3798	26.7068
538	Chr1:177628225-177629225	7.58493	0.565995	0.698089	0.810778	0.417493	0.999637	5	9	4	4	14	12	7.90966	14.7277	3.77439	5.18426	6.46054	7.45307
539	Chr1:177810410-177811410	45.3798	-0.161224	0.272554	-0.59153	0.554166	0.999637	29	23	60	42	89	59	45.876	37.6374	56.6158	54.4348	41.0706	36.6443
540	Chr1:177908745-177909745	4.23031	0.0125172	0.890559	0.0140554	0.988786	0.999637	4	0	3	5	9	9	6.32773	0	2.83079	6.48033	4.15321	5.58981
541	Chr1:178204943-178205943	35.6895	-0.0262248	0.285533	-0.0918449	0.926821	0.999637	21	19	38	27	85	64	33.2206	31.0917	35.8567	34.9938	39.2247	39.7497
542	Chr1:178743698-178744698	49.631	-0.378952	0.264452	-1.43297	0.151866	0.999637	44	25	60	35	96	66	69.605	40.9102	56.6158	45.3623	44.3009	40.9919
543	Chr1:178744292-178745292	40.458	-0.00178259	0.299069	-0.00596048	0.995244	0.999754	35	20	42	39	63	57	55.3676	32.7281	39.6311	50.5466	29.0724	35.4021
544	Chr1:179187834-179188834	34.4903	-0.272308	0.295987	-0.919999	0.357573	0.999637	23	25	39	21	83	44	36.3844	40.9102	36.8003	27.2174	38.3018	27.3279
545	Chr1:179374293-179375293	7.53943	0.806922	0.705747	1.14336	0.25289	0.999637	2	7	7	3	14	22	3.16386	11.4548	6.60518	3.8882	6.46054	13.664
546	Chr1:179659446-179660446	9.35863	0.52846	0.668665	0.790321	0.42934	0.999637	6	7	4	3	22	28	9.49159	11.4548	3.77439	3.8882	10.1523	17.3905
547	Chr1:179726142-179727142	42.0152	-0.294034	0.281752	-1.04359	0.296674	0.999637	38	19	44	35	85	56	60.1134	31.0917	41.5183	45.3623	39.2247	34.781
548	Chr1:179921067-179922067	9.81275	0.752083	0.635597	1.18327	0.236702	0.999637	4	13	7	4	18	18	6.32773	21.2733	6.60518	5.18426	8.30641	11.1796
549	Chr1:179921068-179922068	9.81275	0.752083	0.635597	1.18327	0.236702	0.999637	4	13	7	4	18	18	6.32773	21.2733	6.60518	5.18426	8.30641	11.1796
550	Chr1:180117049-180118049	25.4419	0.10381	0.346687	0.299435	0.764608	0.999637	15	17	31	23	44	35	23.729	27.8189	29.2515	29.8095	20.3046	21.7381
551	Chr1:180185735-180186735	10.9835	0.0273093	0.584427	0.0467283	0.96273	0.999637	4	7	13	5	30	25	6.32773	11.4548	12.2668	6.48033	13.844	15.5272
552	Chr1:180248762-180249762	54.2378	-0.273878	0.257137	-1.06511	0.286828	0.999637	39	31	63	47	120	60	61.6953	50.7286	59.4466	60.9151	55.3761	37.2654
553	Chr1:180267428-180268428	49.7207	-0.267301	0.258051	-1.03585	0.300274	0.999637	33	23	66	42	106	69	52.2037	37.6374	62.2774	54.4348	48.9155	42.8552
554	Chr1:180279178-180280178	5.6248	0.324673	0.772627	0.420219	0.674325	0.999637	3	3	3	4	16	14	4.74579	4.90922	2.83079	5.18426	7.38348	8.69525
555	Chr1:180335513-180336513	52.995	-0.137176	0.251222	-0.546033	0.585043	0.999637	36	30	67	42	102	76	56.9495	49.0922	63.221	54.4348	47.0697	47.2028
556	Chr1:180458757-180459757	30.9271	0.0066407	0.31522	0.0210669	0.983192	0.999637	23	17	34	19	58	61	36.3844	27.8189	32.0823	24.6253	26.7651	37.8865
557	Chr1:18135483-18136483	3.1711	0.732241	1.00197	0.730799	0.464902	0.999637	0	2	4	1	7	12	0	3.27281	3.77439	1.29607	3.23027	7.45307
558	Chr1:181447672-181448672	40.8918	-0.298026	0.287764	-1.03566	0.30036	0.999637	24	17	58	39	91	52	37.9664	27.8189	54.7286	50.5466	41.9935	32.2967
559	Chr1:181450539-181451539	8.04673	0.0553588	0.664333	0.0833299	0.933589	0.999637	7	4	9	6	11	15	11.0735	6.54563	8.49237	7.7764	5.07614	9.31634
560	Chr1:181475898-181476898	47.1438	0.0168209	0.260866	0.0644812	0.948587	0.999637	33	30	51	40	88	66	52.2037	49.0922	48.1234	51.8426	40.6091	40.9919
561	Chr1:181476002-181477002	46.8285	0.0685703	0.260662	0.263063	0.792502	0.999637	32	29	49	42	88	67	50.6218	47.4558	46.2362	54.4348	40.6091	41.613
562	Chr1:181597842-181598842	54.9986	-0.298405	0.260642	-1.14489	0.252256	0.999637	36	32	78	44	109	64	56.9495	52.365	73.6005	57.0269	50.3	39.7497
563	Chr1:181674816-181675816	8.27064	0.20041	0.663004	0.302276	0.762441	0.999637	3	7	7	4	24	17	4.74579	11.4548	6.60518	5.18426	11.0752	10.5585
564	Chr1:181733008-181734008	51.4201	-0.227195	0.249183	-0.911761	0.361895	0.999637	32	28	64	41	118	71	50.6218	45.8194	60.3902	53.1387	54.4532	44.0974
565	Chr1:181733311-181734311	41.6407	-0.235066	0.273728	-0.858757	0.390475	0.999637	26	19	56	35	90	61	41.1302	31.0917	52.8414	45.3623	41.5321	37.8865
566	Chr1:181890104-181891104	46.6076	0.0609553	0.269005	0.226596	0.820738	0.999637	28	32	50	44	94	57	44.2941	52.365	47.1798	57.0269	43.3779	35.4021
567	Chr1:182129233-182130233	9.24407	0.795592	0.623586	1.27583	0.202014	0.999637	3	8	6	7	20	22	4.74579	13.0913	5.66158	9.07246	9.22935	13.664
568	Chr1:182193069-182194069	4.20199	0.710474	0.872217	0.814561	0.415324	0.999637	3	4	2	2	7	10	4.74579	6.54563	1.88719	2.59213	3.23027	6.21089
569	Chr1:182260108-182261108	20.6491	0.180858	0.405255	0.446284	0.655392	0.999637	18	15	18	17	30	29	28.4748	24.5461	16.9847	22.0331	13.844	18.0116
570	Chr1:182260181-182261181	24.0379	0.0434085	0.365501	0.118765	0.905462	0.999637	20	16	25	19	37	34	31.6386	26.1825	23.5899	24.6253	17.0743	21.117
571	Chr1:18227024-18228024	4.56814	0.606429	0.856446	0.708076	0.478898	0.999637	2	6	5	2	6	7	3.16386	9.81844	4.71798	2.59213	2.7688	4.34763
572	Chr1:182413098-182414098	28.4292	-0.173925	0.323883	-0.536998	0.591269	0.999637	14	16	33	20	78	47	22.147	26.1825	31.1387	25.9213	35.9945	29.1912
573	Chr1:182498587-182499587	51.9857	-0.377031	0.250822	-1.50318	0.132792	0.999637	33	27	73	34	120	76	52.2037	44.183	68.8826	44.0662	55.3761	47.2028
574	Chr1:18254661-18255661	2.9636	0.797495	1.0742	0.742408	0.45784	0.999637	0	3	2	0	9	11	0	4.90922	1.88719	0	4.15321	6.83198
575	Chr1:18254719-18255719	3.04051	0.69312	1.06852	0.648676	0.516548	0.999637	0	3	2	0	10	11	0	4.90922	1.88719	0	4.61467	6.83198
576	Chr1:182570999-182571999	58.4069	-0.145907	0.243175	-0.60001	0.5485	0.999637	42	38	68	42	116	80	66.4411	62.1835	64.1646	54.4348	53.5302	49.6872
577	Chr1:182626665-182627665	45.0692	-0.0463244	0.258696	-0.179069	0.857883	0.999637	27	26	47	37	107	70	42.7122	42.5466	44.349	47.9544	49.377	43.4763
578	Chr1:182655675-182656675	54.2936	-0.144367	0.258889	-0.557638	0.577091	0.999637	26	28	70	50	133	75	41.1302	45.8194	66.0518	64.8033	61.3752	46.5817
579	Chr1:182743574-182744574	45.714	-0.0996853	0.264784	-0.376477	0.706562	0.999637	23	31	56	35	108	63	36.3844	50.7286	52.8414	45.3623	49.8385	39.1286
580	Chr1:182780783-182781783	52.0184	-0.442027	0.261724	-1.68891	0.0912372	0.999637	45	23	68	37	102	71	71.1869	37.6374	64.1646	47.9544	47.0697	44.0974
581	Chr1:182822740-182823740	25.5186	-0.403579	0.369188	-1.09315	0.274327	0.999637	27	15	19	12	61	39	42.7122	24.5461	17.9283	15.5528	28.1495	24.2225
582	Chr1:182833906-182834906	43.1123	-0.557079	0.301424	-1.84816	0.0645799	0.999637	33	12	67	39	87	53	52.2037	19.6369	63.221	50.5466	40.1477	32.9177
583	Chr1:182864654-182865654	23.42	-0.130557	0.378198	-0.345207	0.729939	0.999637	13	10	21	16	72	48	20.5651	16.3641	19.8155	20.7371	33.2257	29.8123
584	Chr1:182871976-182872976	53.2379	-0.208897	0.247261	-0.844843	0.398199	0.999637	37	31	66	39	110	75	58.5315	50.7286	62.2774	50.5466	50.7614	46.5817
585	Chr1:182950535-182951535	9.38285	0.295027	0.673222	0.438231	0.661219	0.999637	5	9	3	4	30	19	7.90966	14.7277	2.83079	5.18426	13.844	11.8007
586	Chr1:182980869-182981869	9.1051	0.0904356	0.651004	0.138917	0.889516	0.999637	10	5	4	7	17	16	15.8193	8.18203	3.77439	9.07246	7.84495	9.93743
587	Chr1:183073788-183074788	60.8779	-0.0454209	0.253256	-0.179348	0.857664	0.999637	29	35	82	56	130	84	45.876	57.2742	77.3749	72.5797	59.9908	52.1715
588	Chr1:183080563-183081563	40.0103	-0.248922	0.278878	-0.892582	0.372081	0.999637	28	26	52	26	80	54	44.2941	42.5466	49.067	33.6977	36.9174	33.5388
589	Chr1:183141609-183142609	49.6196	0.0199142	0.255082	0.0780696	0.937773	0.999637	36	33	51	39	94	72	56.9495	54.0014	48.1234	50.5466	43.3779	44.7184
590	Chr1:183155708-183156708	7.61147	0.0595093	0.712089	0.0835701	0.933398	0.999637	7	4	2	6	21	14	11.0735	6.54563	1.88719	7.7764	9.69082	8.69525
591	Chr1:183282260-183283260	35.7477	-0.285121	0.291293	-0.978812	0.327673	0.999637	19	18	45	24	97	59	30.0567	29.4553	42.4618	31.1056	44.7623	36.6443
592	Chr1:183441082-183442082	12.6636	0.358984	0.538262	0.666932	0.504816	0.999637	10	11	9	7	21	24	15.8193	18.0005	8.49237	9.07246	9.69082	14.9061
593	Chr1:183668620-183669620	7.26801	0.709322	0.734314	0.965966	0.334061	0.999637	1	6	4	5	22	19	1.58193	9.81844	3.77439	6.48033	10.1523	11.8007
594	Chr1:183772032-183773032	50.9968	-0.166839	0.26348	-0.633214	0.526594	0.999637	28	25	69	48	111	68	44.2941	40.9102	65.1082	62.2112	51.2229	42.2341
595	Chr1:183782820-183783820	23.2809	-0.177841	0.377717	-0.470831	0.637762	0.999637	19	14	18	11	61	44	30.0567	22.9097	16.9847	14.2567	28.1495	27.3279
596	Chr1:183949611-183950611	37.1029	-0.100915	0.280947	-0.359196	0.719448	0.999637	21	20	41	30	92	59	33.2206	32.7281	38.6875	38.882	42.455	36.6443
597	Chr1:184054369-184055369	34.8226	-0.145939	0.288777	-0.50537	0.613299	0.999637	25	19	34	27	83	53	39.5483	31.0917	32.0823	34.9938	38.3018	32.9177
598	Chr1:184087950-184088950	7.94298	0.452345	0.704472	0.642105	0.520805	0.999637	4	10	4	3	20	13	6.32773	16.3641	3.77439	3.8882	9.22935	8.07416
599	Chr1:184212435-184213435	57.5054	-0.0211754	0.256825	-0.0824508	0.934288	0.999637	44	36	63	50	99	75	69.605	58.9106	59.4466	64.8033	45.6853	46.5817
600	Chr1:184271237-184272237	44.7266	-0.196097	0.265016	-0.739942	0.459335	0.999637	25	27	61	32	98	65	39.5483	44.183	57.5594	41.4741	45.2238	40.3708
601	Chr1:184338651-184339651	45.062	0.00880716	0.259818	0.0338975	0.972959	0.999637	28	26	49	40	95	67	44.2941	42.5466	46.2362	51.8426	43.8394	41.613
602	Chr1:184338804-184339804	46.3748	-0.0667127	0.257062	-0.25952	0.795234	0.999637	27	26	55	39	102	70	42.7122	42.5466	51.8978	50.5466	47.0697	43.4763
603	Chr1:184413899-184414899	10.6125	0.684988	0.62753	1.09156	0.275026	0.999637	2	6	7	8	30	32	3.16386	9.81844	6.60518	10.3685	13.844	19.8749
604	Chr1:184447155-184448155	38.4473	0.0946581	0.277854	0.340676	0.733347	0.999637	28	24	34	29	79	66	44.2941	39.2738	32.0823	37.5859	36.4559	40.9919
605	Chr1:184494639-184495639	11.1156	1.06989	0.644751	1.65938	0.0970384	0.999637	2	14	4	6	28	26	3.16386	22.9097	3.77439	7.7764	12.9211	16.1483
606	Chr1:184678753-184679753	17.5081	0.594429	0.436656	1.36132	0.173412	0.999637	6	12	15	14	38	42	9.49159	19.6369	14.1539	18.1449	17.5358	26.0858
607	Chr1:184693492-184694492	37.4007	-0.0798995	0.285452	-0.279905	0.77955	0.999637	18	26	47	25	88	58	28.4748	42.5466	44.349	32.4016	40.6091	36.0232
608	Chr1:184884420-184885420	20.8494	0.492788	0.384628	1.28121	0.200121	0.999637	12	15	16	15	40	46	18.9832	24.5461	15.0975	19.441	18.4587	28.5701
609	Chr1:185505573-185506573	8.6575	0.110115	0.664725	0.165655	0.868428	0.999637	5	9	8	2	20	16	7.90966	14.7277	7.54877	2.59213	9.22935	9.93743
610	Chr1:185836682-185837682	9.27247	1.24195	0.667899	1.85949	0.0629574	0.999637	4	13	3	5	15	19	6.32773	21.2733	2.83079	6.48033	6.92201	11.8007
611	Chr1:185856953-185857953	43.8433	-0.0211078	0.267471	-0.0789162	0.937099	0.999637	31	25	48	39	84	62	49.0399	40.9102	45.2926	50.5466	38.7633	38.5075
612	Chr1:186555998-186556998	37.2812	-0.246267	0.285151	-0.863638	0.387787	0.999637	25	15	46	28	87	64	39.5483	24.5461	43.4054	36.2898	40.1477	39.7497
613	Chr1:186634692-186635692	13.6638	0.117832	0.511697	0.230277	0.817876	0.999637	4	9	16	12	36	22	6.32773	14.7277	15.0975	15.5528	16.6128	13.664
614	Chr1:186669830-186670830	23.9634	-0.410432	0.386622	-1.06158	0.288424	0.999637	25	7	24	23	47	30	39.5483	11.4548	22.6463	29.8095	21.689	18.6327
615	Chr1:186706597-186707597	31.9721	-0.124974	0.314223	-0.397723	0.690835	0.999637	24	24	26	18	80	48	37.9664	39.2738	24.5335	23.3292	36.9174	29.8123
616	Chr1:186822928-186823928	27.401	-0.103579	0.339677	-0.304934	0.760416	0.999637	23	10	29	24	52	47	36.3844	16.3641	27.3643	31.1056	23.9963	29.1912
617	Chr1:187027548-187028548	48.9735	-0.0658821	0.281761	-0.233822	0.815123	0.999637	23	25	73	48	95	67	36.3844	40.9102	68.8826	62.2112	43.8394	41.613
618	Chr1:187152775-187153775	51.1152	-0.272776	0.264987	-1.02939	0.303296	0.999637	32	30	73	41	102	61	50.6218	49.0922	68.8826	53.1387	47.0697	37.8865
619	Chr1:187155529-187156529	51.4207	-0.353682	0.284605	-1.24271	0.213973	0.999637	43	31	64	43	95	48	68.0231	50.7286	60.3902	55.7308	43.8394	29.8123
620	Chr1:187186475-187187475	44.8193	-0.416098	0.267348	-1.55639	0.119616	0.999637	36	19	58	32	96	65	56.9495	31.0917	54.7286	41.4741	44.3009	40.3708
621	Chr1:187278228-187279228	37.1286	-0.148989	0.281378	-0.529497	0.596461	0.999637	20	21	45	28	91	58	31.6386	34.3645	42.4618	36.2898	41.9935	36.0232
622	Chr1:187940689-187941689	32.6848	0.0095238	0.308951	0.0308263	0.975408	0.999637	26	19	36	22	55	58	41.1302	31.0917	33.9695	28.5135	25.3807	36.0232
623	Chr1:188529371-188530371	29.9542	0.158912	0.327929	0.484592	0.627966	0.999637	21	18	26	33	58	37	33.2206	29.4553	24.5335	42.7702	26.7651	22.9803
624	Chr1:188572737-188573737	55.9225	-0.10014	0.268102	-0.373516	0.708764	0.999637	37	35	75	49	95	67	58.5315	57.2742	70.7697	63.5072	43.8394	41.613
625	Chr1:188790796-188791796	25.9065	0.203526	0.384095	0.529884	0.596192	0.999637	7	18	42	26	43	35	11.0735	29.4553	39.6311	33.6977	19.8431	21.7381
626	Chr1:189038844-189039844	35.6674	-0.266087	0.287006	-0.927113	0.353868	0.999637	25	21	41	27	82	46	39.5483	34.3645	38.6875	34.9938	37.8403	28.5701
627	Chr1:189038888-189039888	37.324	-0.263116	0.284156	-0.925953	0.35447	0.999637	27	24	42	27	84	46	42.7122	39.2738	39.6311	34.9938	38.7633	28.5701
628	Chr1:189432171-189433171	11.7153	-0.373802	0.547584	-0.682638	0.494836	0.999637	7	5	15	7	32	21	11.0735	8.18203	14.1539	9.07246	14.767	13.0429
629	Chr1:190085403-190086403	10.1974	0.835625	0.600049	1.3926	0.163742	0.999637	5	9	5	7	20	25	7.90966	14.7277	4.71798	9.07246	9.22935	15.5272
630	Chr1:190831219-190832219	32.6574	-0.615174	0.307859	-1.99823	0.0456914	0.999637	25	10	45	25	82	44	39.5483	16.3641	42.4618	32.4016	37.8403	27.3279
631	Chr1:19092604-19093604	5.88392	0.413524	0.74035	0.558552	0.576468	0.999637	2	4	6	5	13	12	3.16386	6.54563	5.66158	6.48033	5.99908	7.45307
632	Chr1:191167211-191168211	28.4831	-0.0313432	0.318493	-0.0984107	0.921606	0.999637	17	14	34	23	61	50	26.8928	22.9097	32.0823	29.8095	28.1495	31.0545
633	Chr1:191511465-191512465	51.0448	-0.23832	0.283964	-0.83926	0.401323	0.999637	40	27	64	49	91	53	63.2773	44.183	60.3902	63.5072	41.9935	32.9177
634	Chr1:191551648-191552648	46.0173	-0.336316	0.258789	-1.29957	0.193747	0.999637	29	27	54	30	121	65	45.876	44.183	50.9542	38.882	55.8376	40.3708
635	Chr1:191745742-191746742	37.6567	-0.234688	0.29426	-0.797552	0.42513	0.999637	31	27	38	26	79	43	49.0399	44.183	35.8567	33.6977	36.4559	26.7068
636	Chr1:19198496-19199496	8.43425	0.454885	0.635317	0.715997	0.473993	0.999637	5	7	7	6	15	16	7.90966	11.4548	6.60518	7.7764	6.92201	9.93743
637	Chr1:191994059-191995059	41.9338	0.272784	0.270026	1.01021	0.312394	0.999637	27	22	40	39	77	79	42.7122	36.0009	37.7439	50.5466	35.533	49.0661
638	Chr1:192735149-192736149	58.1048	-0.0176082	0.25323	-0.0695344	0.944564	0.999637	36	26	66	60	122	85	56.9495	42.5466	62.2774	77.764	56.299	52.7926
639	Chr1:192748492-192749492	6.74724	0.223957	0.730377	0.306632	0.759123	0.999637	4	4	4	3	19	18	6.32773	6.54563	3.77439	3.8882	8.76788	11.1796
640	Chr1:192802675-192803675	36.2095	-0.356344	0.292662	-1.2176	0.223378	0.999637	24	15	46	22	92	65	37.9664	24.5461	43.4054	28.5135	42.455	40.3708
641	Chr1:192849569-192850569	48.7282	-0.567951	0.261864	-2.16888	0.0300917	0.999637	37	30	66	23	116	63	58.5315	49.0922	62.2774	29.8095	53.5302	39.1286
642	Chr1:192860202-192861202	10.75	0.369497	0.59629	0.61966	0.535482	0.999637	3	6	9	8	31	27	4.74579	9.81844	8.49237	10.3685	14.3055	16.7694
643	Chr1:192886311-192887311	53.2264	-0.139836	0.252341	-0.554154	0.579473	0.999637	38	29	61	47	108	70	60.1134	47.4558	57.5594	60.9151	49.8385	43.4763
644	Chr1:192886392-192887392	57.5882	-0.0802891	0.253302	-0.31697	0.751267	0.999637	43	31	63	54	110	75	68.0231	50.7286	59.4466	69.9876	50.7614	46.5817
645	Chr1:192921794-192922794	28.1737	-0.405199	0.332613	-1.21823	0.223137	0.999637	23	13	32	25	64	31	36.3844	21.2733	30.1951	32.4016	29.5339	19.2538
646	Chr1:192988196-192989196	6.33095	0.00291833	0.756297	0.00385871	0.996921	0.999754	2	5	6	2	21	14	3.16386	8.18203	5.66158	2.59213	9.69082	8.69525
647	Chr1:193006719-193007719	44.8003	-0.0326192	0.266852	-0.122237	0.902711	0.999637	30	20	52	41	89	73	47.4579	32.7281	49.067	53.1387	41.0706	45.3395
648	Chr1:193141573-193142573	30.4612	-0.0725886	0.306048	-0.237181	0.812517	0.999637	18	16	35	24	70	51	28.4748	26.1825	33.0259	31.1056	32.3027	31.6756
649	Chr1:193149292-193150292	40.8663	-0.113651	0.276787	-0.410607	0.681361	0.999637	23	17	50	36	96	69	36.3844	27.8189	47.1798	46.6584	44.3009	42.8552
650	Chr1:193220420-193221420	47.554	-0.0947024	0.259884	-0.364403	0.715557	0.999637	30	33	54	37	102	61	47.4579	54.0014	50.9542	47.9544	47.0697	37.8865
651	Chr1:193398913-193399913	48.2515	0.0918134	0.269224	0.34103	0.733081	0.999637	26	29	59	49	91	64	41.1302	47.4558	55.6722	63.5072	41.9935	39.7497
652	Chr1:193399143-193400143	43.1635	-0.119393	0.292071	-0.408782	0.6827	0.999637	25	24	60	43	81	49	39.5483	39.2738	56.6158	55.7308	37.3789	30.4334
653	Chr1:193541214-193542214	35.2171	0.134086	0.287603	0.466219	0.641059	0.999637	20	20	33	29	82	65	31.6386	32.7281	31.1387	37.5859	37.8403	40.3708
654	Chr1:193644824-193645824	40.8336	-0.221211	0.271814	-0.813831	0.415742	0.999637	26	22	54	30	87	61	41.1302	36.0009	50.9542	38.882	40.1477	37.8865
655	Chr1:193730147-193731147	48.2118	0.00167694	0.267559	0.00626755	0.994999	0.999754	24	33	60	43	102	61	37.9664	54.0014	56.6158	55.7308	47.0697	37.8865
656	Chr1:193730906-193731906	43.3592	-0.187735	0.26366	-0.712034	0.476444	0.999637	27	25	54	33	96	62	42.7122	40.9102	50.9542	42.7702	44.3009	38.5075
657	Chr1:193800771-193801771	13.2244	0.52211	0.627933	0.831474	0.405706	0.999637	2	16	7	5	45	26	3.16386	26.1825	6.60518	6.48033	20.766	16.1483
658	Chr1:193915940-193916940	39.1382	-0.559299	0.291599	-1.91804	0.0551059	0.999637	31	14	59	28	81	54	49.0399	22.9097	55.6722	36.2898	37.3789	33.5388
659	Chr1:193961392-193962392	43.9161	-0.394913	0.28409	-1.3901	0.1645	0.999637	36	28	59	20	84	65	56.9495	45.8194	55.6722	25.9213	38.7633	40.3708
660	Chr1:194014167-194015167	27.9192	-0.131425	0.321916	-0.408259	0.683083	0.999637	19	19	29	19	64	40	30.0567	31.0917	27.3643	24.6253	29.5339	24.8436
661	Chr1:194596913-194597913	34.3289	0.0174869	0.29186	0.0599154	0.952223	0.999637	20	18	39	32	73	53	31.6386	29.4553	36.8003	41.4741	33.6871	32.9177
662	Chr1:194660413-194661413	27.0242	-0.242322	0.344643	-0.70311	0.481987	0.999637	21	8	30	27	60	40	33.2206	13.0913	28.3079	34.9938	27.688	24.8436
663	Chr1:194681446-194682446	37.8096	-0.0562443	0.308782	-0.182149	0.855466	0.999637	21	18	53	41	69	47	33.2206	29.4553	50.0106	53.1387	31.8413	29.1912
664	Chr1:194861411-194862411	34.7372	0.176114	0.292906	0.601265	0.547664	0.999637	19	18	40	34	66	59	30.0567	29.4553	37.7439	44.0662	30.4569	36.6443
665	Chr1:194955945-194956945	46.2095	-0.295533	0.268333	-1.10137	0.270737	0.999637	28	23	64	40	102	58	44.2941	37.6374	60.3902	51.8426	47.0697	36.0232
666	Chr1:194978807-194979807	34.7342	-0.168095	0.291234	-0.577181	0.563817	0.999637	19	20	44	28	81	49	30.0567	32.7281	41.5183	36.2898	37.3789	30.4334
667	Chr1:194993744-194994744	8.92751	1.28792	0.685814	1.87794	0.0603897	0.999637	1	11	4	6	19	22	1.58193	18.0005	3.77439	7.7764	8.76788	13.664
668	Chr1:195027397-195028397	10.5052	0.63009	0.607437	1.03729	0.2996	0.999637	7	9	4	6	22	25	11.0735	14.7277	3.77439	7.7764	10.1523	15.5272
669	Chr1:195089748-195090748	10.092	0.913266	0.61785	1.47814	0.139372	0.999637	6	11	4	6	17	22	9.49159	18.0005	3.77439	7.7764	7.84495	13.664
670	Chr1:195098882-195099882	27.5122	-0.026527	0.325839	-0.0814114	0.935115	0.999637	17	20	32	18	56	42	26.8928	32.7281	30.1951	23.3292	25.8422	26.0858
671	Chr1:195127652-195128652	13.4903	-0.230765	0.515789	-0.447403	0.654584	0.999637	7	5	21	10	29	25	11.0735	8.18203	19.8155	12.9607	13.3826	15.5272
672	Chr1:195195991-195196991	9.61715	0.0543385	0.738644	0.0735652	0.941356	0.999637	3	6	4	2	42	28	4.74579	9.81844	3.77439	2.59213	19.3816	17.3905
673	Chr1:196445524-196446524	36.5537	-0.113118	0.286267	-0.395148	0.692734	0.999637	25	22	39	21	84	66	39.5483	36.0009	36.8003	27.2174	38.7633	40.9919
674	Chr1:196764516-196765516	24.5719	0.325228	0.626779	0.518888	0.603839	0.999637	4	14	26	18	73	59	6.32773	22.9097	24.5335	23.3292	33.6871	36.6443
675	Chr1:196917942-196918942	27.6808	0.287971	0.334572	0.860716	0.389394	0.999637	13	15	22	27	70	53	20.5651	24.5461	20.7591	34.9938	32.3027	32.9177
676	Chr1:196957264-196958264	32.6164	-0.265693	0.311459	-0.853061	0.393626	0.999637	18	16	50	27	67	45	28.4748	26.1825	47.1798	34.9938	30.9183	27.949
677	Chr1:197002409-197003409	14.6076	0.345693	0.5182	0.667104	0.504706	0.999637	7	12	12	5	35	37	11.0735	19.6369	11.3232	6.48033	16.1514	22.9803
678	Chr1:20607645-20608645	11.6024	0.694337	0.606356	1.1451	0.252169	0.999637	6	10	3	7	30	29	9.49159	16.3641	2.83079	9.07246	13.844	18.0116
679	Chr1:20720487-20721487	12.8678	0.488914	0.53579	0.91251	0.3615	0.999637	4	13	11	10	30	20	6.32773	21.2733	10.3796	12.9607	13.844	12.4218
680	Chr1:20773851-20774851	7.84747	0.609848	0.721488	0.845264	0.397963	0.999637	5	9	3	2	17	18	7.90966	14.7277	2.83079	2.59213	7.84495	11.1796
681	Chr1:20809859-20810859	32.4805	-0.161715	0.307478	-0.52594	0.59893	0.999637	22	24	38	23	67	39	34.8025	39.2738	35.8567	29.8095	30.9183	24.2225
682	Chr1:20880192-20881192	41.9416	-0.408803	0.294194	-1.38957	0.16466	0.999637	19	16	63	37	114	57	30.0567	26.1825	59.4466	47.9544	52.6073	35.4021
683	Chr1:20941208-20942208	35.1782	0.0328802	0.287852	0.114226	0.909059	0.999637	23	22	39	29	68	53	36.3844	36.0009	36.8003	37.5859	31.3798	32.9177
684	Chr1:21068810-21069810	43.992	-0.0824883	0.27254	-0.302665	0.762146	0.999637	25	22	51	44	101	59	39.5483	36.0009	48.1234	57.0269	46.6082	36.6443
685	Chr1:21208157-21209157	27.6604	-0.132817	0.333975	-0.397687	0.690861	0.999637	20	11	34	26	53	42	31.6386	18.0005	32.0823	33.6977	24.4578	26.0858
686	Chr1:21230171-21231171	7.36019	0.811447	0.777135	1.04415	0.296415	0.999637	3	7	3	1	18	25	4.74579	11.4548	2.83079	1.29607	8.30641	15.5272
687	Chr1:21287893-21288893	6.51756	0.613587	0.795926	0.770909	0.440761	0.999637	5	7	2	1	13	17	7.90966	11.4548	1.88719	1.29607	5.99908	10.5585
688	Chr1:21339223-21340223	4.22636	-0.106053	0.897443	-0.118172	0.905931	0.999637	3	3	5	0	9	11	4.74579	4.90922	4.71798	0	4.15321	6.83198
689	Chr1:21357913-21358913	4.37103	0.644488	0.857072	0.751965	0.452072	0.999637	2	3	5	2	6	13	3.16386	4.90922	4.71798	2.59213	2.7688	8.07416
690	Chr1:21373138-21374138	3.98455	-0.211829	0.964003	-0.219739	0.826074	0.999637	3	1	3	0	13	14	4.74579	1.63641	2.83079	0	5.99908	8.69525
691	Chr1:21951523-21952523	35.4312	-0.0752049	0.290055	-0.259278	0.79542	0.999637	19	19	37	29	93	58	30.0567	31.0917	34.9131	37.5859	42.9165	36.0232
692	Chr1:22911173-22912173	9.20562	0.422757	0.613983	0.688548	0.491108	0.999637	6	6	6	7	19	20	9.49159	9.81844	5.66158	9.07246	8.76788	12.4218
693	Chr1:23108592-23109592	8.9528	1.1753	1.2877	0.912712	0.361394	0.999637	0	14	5	2	24	20	0	22.9097	4.71798	2.59213	11.0752	12.4218
694	Chr1:23262745-23263745	28.4499	-0.198912	0.323644	-0.614603	0.538817	0.999637	23	15	33	20	55	44	36.3844	24.5461	31.1387	25.9213	25.3807	27.3279
695	Chr1:23389514-23390514	28.0626	-0.0945711	0.319985	-0.295549	0.767575	0.999637	20	15	30	20	61	48	31.6386	24.5461	28.3079	25.9213	28.1495	29.8123
696	Chr1:23768093-23769093	26.3315	-0.193843	0.332624	-0.582768	0.56005	0.999637	15	14	34	18	62	44	23.729	22.9097	32.0823	23.3292	28.611	27.3279
697	Chr1:23928656-23929656	30.8704	0.0910418	0.311434	0.292331	0.770034	0.999637	17	24	29	19	74	53	26.8928	39.2738	27.3643	24.6253	34.1486	32.9177
698	Chr1:24011995-24012995	33.5258	-0.086801	0.301175	-0.288208	0.773187	0.999637	15	20	44	28	79	49	23.729	32.7281	41.5183	36.2898	36.4559	30.4334
699	Chr1:24106680-24107680	39.5856	-0.178262	0.275904	-0.6461	0.518214	0.999637	27	22	47	33	84	53	42.7122	36.0009	44.349	42.7702	38.7633	32.9177
700	Chr1:24183950-24184950	8.80647	0.868027	0.667594	1.30023	0.193521	0.999637	2	10	5	5	21	20	3.16386	16.3641	4.71798	6.48033	9.69082	12.4218
701	Chr1:24593811-24594811	15.5824	0.036199	0.457336	0.0791518	0.936912	0.999637	10	10	14	11	37	27	15.8193	16.3641	13.2104	14.2567	17.0743	16.7694
702	Chr1:24619039-24620039	1.84275	1.78677	2.32795	0.767531	0.442766	0.999637	0	0	0	1	5	12	0	0	0	1.29607	2.30734	7.45307
703	Chr1:24684884-24685884	31.0988	-0.260611	0.318193	-0.819033	0.412767	0.999637	27	19	27	24	72	37	42.7122	31.0917	25.4771	31.1056	33.2257	22.9803
704	Chr1:25886052-25887052	18.6251	0.230984	0.414023	0.5579	0.576913	0.999637	11	8	19	17	37	39	17.4012	13.0913	17.9283	22.0331	17.0743	24.2225
705	Chr1:25887003-25888003	20.1631	0.14396	0.392038	0.367208	0.713464	0.999637	11	9	23	19	41	38	17.4012	14.7277	21.7027	24.6253	18.9202	23.6014
706	Chr1:26743805-26744805	38.4637	0.635241	0.578985	1.09716	0.27257	0.999637	19	40	22	14	85	92	30.0567	65.4563	20.7591	18.1449	39.2247	57.1402
707	Chr1:27098847-27099847	4.19067	0.336158	0.869423	0.386645	0.699019	0.999637	2	4	4	1	9	10	3.16386	6.54563	3.77439	1.29607	4.15321	6.21089
708	Chr1:28836597-28837597	7.11941	0.27604	0.808392	0.341468	0.732751	0.999637	3	9	4	0	22	15	4.74579	14.7277	3.77439	0	10.1523	9.31634
709	Chr1:28911534-28912534	2.59776	0.350685	1.04403	0.335895	0.73695	0.999637	2	3	2	1	4	4	3.16386	4.90922	1.88719	1.29607	1.84587	2.48436
710	Chr1:30776306-30777306	13.0041	0.475303	0.544087	0.873578	0.382348	0.999637	5	10	9	7	34	33	7.90966	16.3641	8.49237	9.07246	15.6899	20.496
711	Chr1:30930039-30931039	43.6783	0.145196	0.273251	0.531363	0.595167	0.999637	26	32	51	37	75	61	41.1302	52.365	48.1234	47.9544	34.6101	37.8865
712	Chr1:31006115-31007115	32.2984	-0.0164647	0.304046	-0.0541521	0.956814	0.999637	16	18	34	29	83	50	25.3109	29.4553	32.0823	37.5859	38.3018	31.0545
713	Chr1:31035310-31036310	3.16831	0.604591	0.954429	0.633458	0.526434	0.999637	1	3	2	2	8	7	1.58193	4.90922	1.88719	2.59213	3.69174	4.34763
714	Chr1:31056250-31057250	3.82009	1.06754	0.952254	1.12106	0.262261	0.999637	0	4	4	1	7	13	0	6.54563	3.77439	1.29607	3.23027	8.07416
715	Chr1:31232752-31233752	9.18223	0.671345	0.640479	1.04819	0.294551	0.999637	7	7	5	5	14	24	11.0735	11.4548	4.71798	6.48033	6.46054	14.9061
716	Chr1:31279006-31280006	10.2984	0.221368	0.590753	0.374721	0.707868	0.999637	7	10	9	6	19	15	11.0735	16.3641	8.49237	7.7764	8.76788	9.31634
717	Chr1:31279185-31280185	10.8314	0.209079	0.585744	0.356946	0.721132	0.999637	8	11	8	6	21	15	12.6555	18.0005	7.54877	7.7764	9.69082	9.31634
718	Chr1:32229152-32230152	24.4598	-0.337545	0.370971	-0.909896	0.362877	0.999637	16	6	26	20	72	45	25.3109	9.81844	24.5335	25.9213	33.2257	27.949
719	Chr1:32577344-32578344	3.2193	-0.130706	0.947621	-0.137931	0.890295	0.999637	3	2	3	2	6	5	4.74579	3.27281	2.83079	2.59213	2.7688	3.10545
720	Chr1:32603638-32604638	3.4213	-0.173054	0.963217	-0.179662	0.857418	0.999637	2	4	3	2	9	2	3.16386	6.54563	2.83079	2.59213	4.15321	1.24218
721	Chr1:33726131-33727131	54.5595	-0.216068	0.267957	-0.806354	0.420039	0.999637	29	30	83	47	109	69	45.876	49.0922	78.3185	60.9151	50.3	42.8552
722	Chr1:33726189-33727189	56.5151	-0.289287	0.256349	-1.12849	0.259113	0.999637	34	32	84	43	114	73	53.7857	52.365	79.2621	55.7308	52.6073	45.3395
723	Chr1:33776228-33777228	39.9194	-0.252775	0.285291	-0.886025	0.375604	0.999637	20	21	59	33	90	54	31.6386	34.3645	55.6722	42.7702	41.5321	33.5388
724	Chr1:33814139-33815139	34.1131	0.179935	0.302961	0.593921	0.552565	0.999637	13	19	44	32	71	60	20.5651	31.0917	41.5183	41.4741	32.7642	37.2654
725	Chr1:33870940-33871940	54.4937	-0.12494	0.257536	-0.485138	0.627579	0.999637	31	25	67	54	124	75	49.0399	40.9102	63.221	69.9876	57.222	46.5817
726	Chr1:33964161-33965161	43.6672	-0.0131661	0.264441	-0.0497883	0.960291	0.999637	25	28	48	28	101	78	39.5483	45.8194	45.2926	36.2898	46.6082	48.445
727	Chr1:33964626-33965626	41.5897	-0.0621673	0.274485	-0.226487	0.820822	0.999637	21	20	51	38	98	66	33.2206	32.7281	48.1234	49.2505	45.2238	40.9919
728	Chr1:34459794-34460794	5.4519	0.236977	0.768556	0.308341	0.757823	0.999637	2	4	6	3	13	12	3.16386	6.54563	5.66158	3.8882	5.99908	7.45307
729	Chr1:34496017-34497017	59.3218	-0.354604	0.244355	-1.45118	0.146729	0.999637	48	32	72	43	123	76	75.9327	52.365	67.939	55.7308	56.7605	47.2028
730	Chr1:34496197-34497197	51.8439	-0.351545	0.255151	-1.37779	0.168268	0.999637	39	28	66	40	109	63	61.6953	45.8194	62.2774	51.8426	50.3	39.1286
731	Chr1:34516092-34517092	43.2904	-0.330517	0.269292	-1.22736	0.219688	0.999637	30	24	57	33	93	54	47.4579	39.2738	53.785	42.7702	42.9165	33.5388
732	Chr1:34554776-34555776	17.5721	0.810858	0.432329	1.87556	0.0607161	0.999637	6	15	14	19	31	31	9.49159	24.5461	13.2104	24.6253	14.3055	19.2538
733	Chr1:34591994-34592994	5.88227	1.03513	0.769843	1.34459	0.178756	0.999637	3	4	2	5	11	17	4.74579	6.54563	1.88719	6.48033	5.07614	10.5585
734	Chr1:34617288-34618288	14.6231	0.441321	0.491296	0.89828	0.369036	0.999637	9	13	9	13	30	21	14.2374	21.2733	8.49237	16.8489	13.844	13.0429
735	Chr1:34635958-34636958	39.7846	-0.146704	0.285397	-0.514034	0.607229	0.999637	22	17	52	39	89	57	34.8025	27.8189	49.067	50.5466	41.0706	35.4021
736	Chr1:34636039-34637039	38.8008	-0.100871	0.290145	-0.347657	0.728098	0.999637	21	17	49	40	87	54	33.2206	27.8189	46.2362	51.8426	40.1477	33.5388
737	Chr1:34778270-34779270	10.8567	0.520911	0.607621	0.857295	0.391282	0.999637	4	9	5	7	32	25	6.32773	14.7277	4.71798	9.07246	14.767	15.5272
738	Chr1:34899410-34900410	44.6705	-0.144936	0.308512	-0.46979	0.638505	0.999637	24	26	74	40	70	54	37.9664	42.5466	69.8261	51.8426	32.3027	33.5388
739	Chr1:34906305-34907305	22.6276	0.115966	0.368115	0.315027	0.752741	0.999637	17	11	23	19	40	42	26.8928	18.0005	21.7027	24.6253	18.4587	26.0858
740	Chr1:36124746-36125746	34.5707	-0.0418607	0.290966	-0.143868	0.885605	0.999637	20	18	39	25	81	64	31.6386	29.4553	36.8003	32.4016	37.3789	39.7497
741	Chr1:36300650-36301650	48.6536	-0.0660426	0.277024	-0.2384	0.811571	0.999637	31	29	68	42	79	65	49.0399	47.4558	64.1646	54.4348	36.4559	40.3708
742	Chr1:36329770-36330770	14.691	0.283776	0.488005	0.581503	0.560901	0.999637	6	12	13	9	37	29	9.49159	19.6369	12.2668	11.6646	17.0743	18.0116
743	Chr1:36364079-36365079	31.6066	0.0224181	0.314835	0.0712059	0.943234	0.999637	18	20	43	27	54	45	28.4748	32.7281	40.5747	34.9938	24.9192	27.949
744	Chr1:36425526-36426526	36.9995	-0.274702	0.28149	-0.975884	0.329122	0.999637	26	21	42	28	87	49	41.1302	34.3645	39.6311	36.2898	40.1477	30.4334
745	Chr1:36501616-36502616	33.9782	-0.0874344	0.297337	-0.294058	0.768714	0.999637	23	23	40	26	66	45	36.3844	37.6374	37.7439	33.6977	30.4569	27.949
746	Chr1:36527943-36528943	50.0378	-0.275705	0.26647	-1.03466	0.30083	0.999637	31	20	73	41	104	78	49.0399	32.7281	68.8826	53.1387	47.9926	48.445
747	Chr1:36568213-36569213	41.3737	0.223025	0.285455	0.781299	0.434627	0.999637	16	24	43	44	99	65	25.3109	39.2738	40.5747	57.0269	45.6853	40.3708
748	Chr1:36592084-36593084	11.7128	1.16956	0.653241	1.79039	0.0733906	0.999637	1	14	4	7	31	30	1.58193	22.9097	3.77439	9.07246	14.3055	18.6327
749	Chr1:36603546-36604546	37.8458	0.146374	0.297419	0.492149	0.622614	0.999637	19	22	45	42	73	49	30.0567	36.0009	42.4618	54.4348	33.6871	30.4334
750	Chr1:3661079-3662079	40.2604	-0.439317	0.275199	-1.59636	0.110408	0.999637	28	16	49	29	107	61	44.2941	26.1825	46.2362	37.5859	49.377	37.8865
751	Chr1:36614694-36615694	41.0677	-0.0914663	0.289593	-0.315844	0.752121	0.999637	26	19	50	44	83	51	41.1302	31.0917	47.1798	57.0269	38.3018	31.6756
752	Chr1:36739528-36740528	20.0819	-0.378872	0.405628	-0.934038	0.350284	0.999637	19	13	22	11	39	26	30.0567	21.2733	20.7591	14.2567	17.9972	16.1483
753	Chr1:36747833-36748833	30.8484	-0.267766	0.321128	-0.833829	0.404377	0.999637	21	17	42	27	60	35	33.2206	27.8189	39.6311	34.9938	27.688	21.7381
754	Chr1:36770767-36771767	11.3324	0.724754	0.592764	1.22267	0.221454	0.999637	5	12	6	5	25	27	7.90966	19.6369	5.66158	6.48033	11.5367	16.7694
755	Chr1:36818196-36819196	11.299	0.491669	0.62734	0.783736	0.433195	0.999637	6	6	5	5	31	37	9.49159	9.81844	4.71798	6.48033	14.3055	22.9803
756	Chr1:36995872-36996872	51.3278	0.0316592	0.252811	0.125229	0.900343	0.999637	33	34	54	45	104	69	52.2037	55.6378	50.9542	58.323	47.9926	42.8552
757	Chr1:37014862-37015862	9.28591	0.597862	0.635024	0.941478	0.34646	0.999637	8	5	6	10	11	18	12.6555	8.18203	5.66158	12.9607	5.07614	11.1796
758	Chr1:37082942-37083942	9.43667	-0.332508	0.624623	-0.532333	0.594495	0.999637	5	6	14	3	23	18	7.90966	9.81844	13.2104	3.8882	10.6138	11.1796
759	Chr1:37210190-37211190	7.11784	0.722808	0.707435	1.02173	0.306909	0.999637	3	6	4	4	16	19	4.74579	9.81844	3.77439	5.18426	7.38348	11.8007
760	Chr1:37274682-37275682	11.021	0.424587	0.576941	0.735929	0.461774	0.999637	6	9	7	6	26	25	9.49159	14.7277	6.60518	7.7764	11.9982	15.5272
761	Chr1:37356211-37357211	29.3763	-0.500718	0.353051	-1.41826	0.156114	0.999637	24	6	43	28	58	40	37.9664	9.81844	40.5747	36.2898	26.7651	24.8436
762	Chr1:37486448-37487448	55.3267	0.0624762	0.243653	0.256414	0.797631	0.999637	32	34	54	49	128	84	50.6218	55.6378	50.9542	63.5072	59.0678	52.1715
763	Chr1:37486516-37487516	57.9522	0.147955	0.24537	0.602987	0.546517	0.999637	32	37	53	55	134	86	50.6218	60.547	50.0106	71.2836	61.8366	53.4137
764	Chr1:37597361-37598361	34.2514	0.0806319	0.300889	0.267978	0.788716	0.999637	17	19	45	33	65	52	26.8928	31.0917	42.4618	42.7702	29.9954	32.2967
765	Chr1:37776430-37777430	39.1161	-0.0480096	0.273512	-0.17553	0.860663	0.999637	24	25	42	31	88	57	37.9664	40.9102	39.6311	40.178	40.6091	35.4021
766	Chr1:37921643-37922643	32.7042	-0.251125	0.303296	-0.827987	0.407678	0.999637	17	18	47	24	75	48	26.8928	29.4553	44.349	31.1056	34.6101	29.8123
767	Chr1:37928084-37929084	16.8819	0.112917	0.441183	0.255941	0.797996	0.999637	11	13	17	14	32	22	17.4012	21.2733	16.0411	18.1449	14.767	13.664
768	Chr1:37946756-37947756	47.9929	-0.496793	0.286395	-1.73464	0.082804	0.999637	25	16	81	38	115	70	39.5483	26.1825	76.4313	49.2505	53.0688	43.4763
769	Chr1:37946823-37947823	50.098	-0.367395	0.274766	-1.33712	0.181183	0.999637	25	20	80	39	118	77	39.5483	32.7281	75.4877	50.5466	54.4532	47.8239
770	Chr1:37972838-37973838	12.3232	0.301448	0.582557	0.517456	0.604838	0.999637	8	11	4	7	35	23	12.6555	18.0005	3.77439	9.07246	16.1514	14.2851
771	Chr1:38014104-38015104	7.17954	0.122381	0.728965	0.167884	0.866675	0.999637	6	3	10	6	6	14	9.49159	4.90922	9.43597	7.7764	2.7688	8.69525
772	Chr1:38053691-38054691	44.9282	-0.0519339	0.279536	-0.185786	0.852612	0.999637	23	31	64	36	84	59	36.3844	50.7286	60.3902	46.6584	38.7633	36.6443
773	Chr1:38054356-38055356	49.5189	-0.269052	0.266207	-1.01069	0.312167	0.999637	32	24	70	43	99	64	50.6218	39.2738	66.0518	55.7308	45.6853	39.7497
774	Chr1:38186007-38187007	34.7905	-0.152724	0.294868	-0.51794	0.6045	0.999637	23	26	41	20	74	50	36.3844	42.5466	38.6875	25.9213	34.1486	31.0545
775	Chr1:38721300-38722300	6.91805	0.784352	0.781278	1.00394	0.31541	0.999637	3	10	2	2	17	13	4.74579	16.3641	1.88719	2.59213	7.84495	8.07416
776	Chr1:38892435-38893435	39.8473	-0.162156	0.275386	-0.588833	0.555973	0.999637	30	26	44	26	82	58	47.4579	42.5466	41.5183	33.6977	37.8403	36.0232
777	Chr1:38954505-38955505	32.6987	-0.0935079	0.307229	-0.304359	0.760854	0.999637	18	16	31	28	92	54	28.4748	26.1825	29.2515	36.2898	42.455	33.5388
778	Chr1:38995495-38996495	7.64442	0.27034	0.708886	0.381358	0.702937	0.999637	5	9	5	2	17	13	7.90966	14.7277	4.71798	2.59213	7.84495	8.07416
779	Chr1:39044160-39045160	48.7441	-0.000896891	0.274126	-0.00327182	0.997389	0.999754	36	32	58	41	77	64	56.9495	52.365	54.7286	53.1387	35.533	39.7497
780	Chr1:39250077-39251077	35.5417	-0.236323	0.298902	-0.790637	0.429156	0.999637	32	17	31	29	80	50	50.6218	27.8189	29.2515	37.5859	36.9174	31.0545
781	Chr1:39424197-39425197	38.6796	-0.0595455	0.29656	-0.200787	0.840865	0.999637	20	21	51	40	80	47	31.6386	34.3645	48.1234	51.8426	36.9174	29.1912
782	Chr1:39535092-39536092	52.84	-0.26166	0.246505	-1.06148	0.288472	0.999637	34	26	66	37	125	85	53.7857	42.5466	62.2774	47.9544	57.6834	52.7926
783	Chr1:39591338-39592338	20.473	0.206273	0.386278	0.534002	0.59334	0.999637	9	15	22	17	45	33	14.2374	24.5461	20.7591	22.0331	20.766	20.496
784	Chr1:39633750-39634750	50.5525	-0.200893	0.251392	-0.799121	0.42422	0.999637	33	24	60	43	116	74	52.2037	39.2738	56.6158	55.7308	53.5302	45.9606
785	Chr1:39707527-39708527	31.848	-0.248893	0.317938	-0.782837	0.433723	0.999637	23	20	36	28	69	32	36.3844	32.7281	33.9695	36.2898	31.8413	19.8749
786	Chr1:39777342-39778342	28.7427	-0.371148	0.333174	-1.11398	0.265289	0.999637	21	18	36	23	62	28	33.2206	29.4553	33.9695	29.8095	28.611	17.3905
787	Chr1:39860689-39861689	7.73896	0.329047	0.726277	0.45306	0.650505	0.999637	5	9	5	1	17	16	7.90966	14.7277	4.71798	1.29607	7.84495	9.93743
788	Chr1:39957259-39958259	39.9454	-0.326548	0.279761	-1.16724	0.243114	0.999637	24	23	46	32	107	48	37.9664	37.6374	43.4054	41.4741	49.377	29.8123
789	Chr1:40141114-40142114	8.45701	0.935593	0.708875	1.31983	0.186892	0.999637	3	11	2	5	21	16	4.74579	18.0005	1.88719	6.48033	9.69082	9.93743
790	Chr1:40281426-40282426	7.39801	0.356466	0.741787	0.48055	0.630837	0.999637	5	5	1	8	22	11	7.90966	8.18203	0.943597	10.3685	10.1523	6.83198
791	Chr1:40380973-40381973	11.8445	-0.349724	0.565211	-0.618749	0.536082	0.999637	10	10	11	4	29	16	15.8193	16.3641	10.3796	5.18426	13.3826	9.93743
792	Chr1:40485916-40486916	8.48468	0.59151	0.664401	0.890291	0.37331	0.999637	3	6	4	7	24	20	4.74579	9.81844	3.77439	9.07246	11.0752	12.4218
793	Chr1:40521898-40522898	11.3302	-0.0145946	0.569999	-0.0256046	0.979573	0.999637	4	7	14	6	31	24	6.32773	11.4548	13.2104	7.7764	14.3055	14.9061
794	Chr1:40571708-40572708	5.74317	0.892349	0.779672	1.14452	0.252409	0.999637	3	4	2	4	12	17	4.74579	6.54563	1.88719	5.18426	5.53761	10.5585
795	Chr1:40636573-40637573	9.49666	0.205601	0.64979	0.316412	0.75169	0.999637	8	4	3	8	25	21	12.6555	6.54563	2.83079	10.3685	11.5367	13.0429
796	Chr1:40738058-40739058	28.7252	0.224372	0.316654	0.708572	0.47859	0.999637	17	21	25	21	62	51	26.8928	34.3645	23.5899	27.2174	28.611	31.6756
797	Chr1:40847032-40848032	32.916	0.0171224	0.304969	0.0561448	0.955226	0.999637	17	15	41	33	70	52	26.8928	24.5461	38.6875	42.7702	32.3027	32.2967
798	Chr1:40861947-40862947	8.59803	0.451993	0.655795	0.689229	0.490679	0.999637	4	7	4	6	24	18	6.32773	11.4548	3.77439	7.7764	11.0752	11.1796
799	Chr1:42286072-42287072	10.4787	0.879209	0.594309	1.47938	0.139039	0.999637	2	8	9	9	21	27	3.16386	13.0913	8.49237	11.6646	9.69082	16.7694
800	Chr1:42753492-42754492	21.527	-0.23795	0.381103	-0.624371	0.532384	0.999637	17	9	19	17	56	35	26.8928	14.7277	17.9283	22.0331	25.8422	21.7381
801	Chr1:42907579-42908579	35.0884	-0.304472	0.294875	-1.03254	0.301818	0.999637	18	19	51	25	84	51	28.4748	31.0917	48.1234	32.4016	38.7633	31.6756
802	Chr1:43009220-43010220	30.5283	-0.134613	0.330359	-0.407474	0.68366	0.999637	13	14	34	22	92	59	20.5651	22.9097	32.0823	28.5135	42.455	36.6443
803	Chr1:43088406-43089406	7.68606	1.18	0.717292	1.64508	0.0999532	0.999637	1	8	3	8	18	16	1.58193	13.0913	2.83079	10.3685	8.30641	9.93743
804	Chr1:43148934-43149934	43.9888	-0.0874311	0.272865	-0.320419	0.748651	0.999637	35	29	48	32	79	61	55.3676	47.4558	45.2926	41.4741	36.4559	37.8865
805	Chr1:43154967-43155967	61.5241	0.126646	0.258498	0.489932	0.624182	0.999637	33	30	74	68	117	90	52.2037	49.0922	69.8261	88.1325	53.9917	55.8981
806	Chr1:43155056-43156056	63.0702	0.128017	0.251736	0.508536	0.611077	0.999637	33	32	76	67	122	95	52.2037	52.365	71.7133	86.8364	56.299	59.0035
807	Chr1:43220306-43221306	24.7263	-0.194215	0.372832	-0.520917	0.602425	0.999637	22	7	21	19	59	49	34.8025	11.4548	19.8155	24.6253	27.2266	30.4334
808	Chr1:4349973-4350973	4.67611	0.711912	0.85331	0.834294	0.404115	0.999637	4	4	3	2	5	12	6.32773	6.54563	2.83079	2.59213	2.30734	7.45307
809	Chr1:43502097-43503097	44.938	-0.150405	0.262335	-0.573332	0.56642	0.999637	30	29	45	34	109	61	47.4579	47.4558	42.4618	44.0662	50.3	37.8865
810	Chr1:43786948-43787948	20.1062	0.000585842	0.393185	0.00148999	0.998811	0.999754	11	11	20	14	52	39	17.4012	18.0005	18.8719	18.1449	23.9963	24.2225
811	Chr1:43884145-43885145	44.8354	0.170391	0.267419	0.637169	0.524015	0.999637	27	22	51	43	81	79	42.7122	36.0009	48.1234	55.7308	37.3789	49.0661
812	Chr1:43990348-43991348	58.7361	0.00168117	0.246416	0.0068225	0.994556	0.999754	37	35	63	56	123	77	58.5315	57.2742	59.4466	72.5797	56.7605	47.8239
813	Chr1:44076379-44077379	8.03066	0.323577	0.729413	0.443613	0.657323	0.999637	5	8	4	1	21	20	7.90966	13.0913	3.77439	1.29607	9.69082	12.4218
814	Chr1:44118281-44119281	5.66744	0.459283	0.769843	0.596592	0.55078	0.999637	2	5	4	3	15	13	3.16386	8.18203	3.77439	3.8882	6.92201	8.07416
815	Chr1:44158786-44159786	36.3507	0.138788	0.290015	0.478554	0.632256	0.999637	21	20	32	37	85	56	33.2206	32.7281	30.1951	47.9544	39.2247	34.781
816	Chr1:44175153-44176153	40.8106	-0.124266	0.276991	-0.448629	0.653699	0.999637	28	23	52	33	76	58	44.2941	37.6374	49.067	42.7702	35.0715	36.0232
817	Chr1:44175303-44176303	42.0756	-0.175069	0.282173	-0.620434	0.534972	0.999637	29	21	57	37	76	57	45.876	34.3645	53.785	47.9544	35.0715	35.4021
818	Chr1:44204090-44205090	42.8375	0.118206	0.297754	0.396994	0.691372	0.999637	15	20	60	45	90	71	23.729	32.7281	56.6158	58.323	41.5321	44.0974
819	Chr1:44275306-44276306	8.68172	0.249194	0.64327	0.387387	0.69847	0.999637	3	6	8	5	24	20	4.74579	9.81844	7.54877	6.48033	11.0752	12.4218
820	Chr1:44607857-44608857	29.3833	-0.122201	0.318724	-0.383409	0.701417	0.999637	19	15	39	24	56	45	30.0567	24.5461	36.8003	31.1056	25.8422	27.949
821	Chr1:4485994-4486994	15.3499	-0.0972774	0.483741	-0.201094	0.840625	0.999637	14	12	11	9	33	21	22.147	19.6369	10.3796	11.6646	15.2284	13.0429
822	Chr1:45367884-45368884	8.0846	0.374143	0.661931	0.56523	0.571917	0.999637	3	6	9	4	17	20	4.74579	9.81844	8.49237	5.18426	7.84495	12.4218
823	Chr1:45559627-45560627	10.0634	-0.361795	0.604496	-0.598506	0.549502	0.999637	7	8	9	4	30	14	11.0735	13.0913	8.49237	5.18426	13.844	8.69525
824	Chr1:45851512-45852512	29.7181	-0.0404513	0.313299	-0.129114	0.897268	0.999637	19	14	29	26	72	50	30.0567	22.9097	27.3643	33.6977	33.2257	31.0545
825	Chr1:45981939-45982939	40.9667	-0.199166	0.272972	-0.72962	0.465623	0.999637	31	27	44	28	88	55	49.0399	44.183	41.5183	36.2898	40.6091	34.1599
826	Chr1:46037894-46038894	4.26675	-0.21514	0.873001	-0.246437	0.805344	0.999637	5	1	3	4	8	7	7.90966	1.63641	2.83079	5.18426	3.69174	4.34763
827	Chr1:46068365-46069365	7.04127	0.0611345	0.697744	0.0876174	0.930181	0.999637	3	4	7	4	20	16	4.74579	6.54563	6.60518	5.18426	9.22935	9.93743
828	Chr1:46086814-46087814	5.70008	0.85862	0.767338	1.11896	0.263158	0.999637	1	4	6	5	10	15	1.58193	6.54563	5.66158	6.48033	4.61467	9.31634
829	Chr1:46123084-46124084	21.1586	0.0853863	0.37757	0.226147	0.821087	0.999637	14	11	22	16	43	41	22.147	18.0005	20.7591	20.7371	19.8431	25.4647
830	Chr1:46910391-46911391	13.4549	0.567768	0.536391	1.0585	0.289829	0.999637	4	5	11	16	33	32	6.32773	8.18203	10.3796	20.7371	15.2284	19.8749
831	Chr1:4775320-4776320	64.0625	-0.400776	0.274423	-1.46043	0.144172	0.999637	35	24	99	62	149	76	55.3676	39.2738	93.4161	80.3561	68.7586	47.2028
832	Chr1:4797370-4798370	60.8832	-0.117181	0.248302	-0.471928	0.636978	0.999637	41	38	74	52	118	75	64.8592	62.1835	69.8261	67.3954	54.4532	46.5817
833	Chr1:4847276-4848276	46.4884	-0.167947	0.27109	-0.619525	0.535571	0.999637	22	24	63	42	111	64	34.8025	39.2738	59.4466	54.4348	51.2229	39.7497
834	Chr1:4870250-4871250	6.56607	0.114697	0.745512	0.15385	0.877728	0.999637	6	2	3	5	16	16	9.49159	3.27281	2.83079	6.48033	7.38348	9.93743
835	Chr1:49300961-49301961	5.83324	0.93484	0.783205	1.19361	0.232631	0.999637	1	6	4	3	13	16	1.58193	9.81844	3.77439	3.8882	5.99908	9.93743
836	Chr1:5059866-5060866	10.3775	0.0231768	0.589665	0.039305	0.968647	0.999637	6	8	11	4	24	21	9.49159	13.0913	10.3796	5.18426	11.0752	13.0429
837	Chr1:5072755-5073755	44.5438	-0.146053	0.281276	-0.519251	0.603586	0.999637	26	20	62	44	88	60	41.1302	32.7281	58.503	57.0269	40.6091	37.2654
838	Chr1:50956992-50957992	5.34864	1.37961	0.855001	1.61357	0.10662	0.999637	0	4	2	5	13	18	0	6.54563	1.88719	6.48033	5.99908	11.1796
839	Chr1:51345471-51346471	14.8185	0.430622	0.53795	0.800487	0.423428	0.999637	9	12	6	6	39	38	14.2374	19.6369	5.66158	7.7764	17.9972	23.6014
840	Chr1:51534743-51535743	42.2543	-0.611628	0.282049	-2.16852	0.0301193	0.999637	34	14	58	35	99	50	53.7857	22.9097	54.7286	45.3623	45.6853	31.0545
841	Chr1:51972415-51973415	44.0473	-0.0722406	0.260441	-0.277378	0.78149	0.999637	28	25	45	34	105	71	44.2941	40.9102	42.4618	44.0662	48.4541	44.0974
842	Chr1:51997605-51998605	10.0963	0.257836	0.599924	0.429781	0.667355	0.999637	5	7	6	8	29	19	7.90966	11.4548	5.66158	10.3685	13.3826	11.8007
843	Chr1:52043493-52044493	7.29503	-0.0176282	0.742683	-0.0237358	0.981063	0.999637	1	5	6	4	30	15	1.58193	8.18203	5.66158	5.18426	13.844	9.31634
844	Chr1:52147410-52148410	3.45714	0.682079	0.981438	0.694979	0.487069	0.999637	0	2	2	2	12	12	0	3.27281	1.88719	2.59213	5.53761	7.45307
845	Chr1:52175783-52176783	44.6424	0.133505	0.278645	0.479123	0.631851	0.999637	31	21	40	50	90	65	49.0399	34.3645	37.7439	64.8033	41.5321	40.3708
846	Chr1:52289576-52290576	35.0247	-0.134366	0.296323	-0.453444	0.650229	0.999637	17	17	44	32	87	52	26.8928	27.8189	41.5183	41.4741	40.1477	32.2967
847	Chr1:52557023-52558023	27.5883	0.170646	0.324572	0.525756	0.599058	0.999637	18	17	26	26	54	42	28.4748	27.8189	24.5335	33.6977	24.9192	26.0858
848	Chr1:52687050-52688050	33.4311	-0.329774	0.304158	-1.08422	0.278268	0.999637	18	14	49	27	80	50	28.4748	22.9097	46.2362	34.9938	36.9174	31.0545
849	Chr1:52783806-52784806	44.1979	-0.00234929	0.268958	-0.00873479	0.993031	0.999754	32	25	46	41	85	61	50.6218	40.9102	43.4054	53.1387	39.2247	37.8865
850	Chr1:52874032-52875032	36.968	0.10835	0.28287	0.383038	0.701691	0.999637	26	20	33	33	77	62	41.1302	32.7281	31.1387	42.7702	35.533	38.5075
851	Chr1:52901358-52902358	41.317	-0.000628632	0.279115	-0.00225223	0.998203	0.999754	29	20	50	36	72	68	45.876	32.7281	47.1798	46.6584	33.2257	42.2341
852	Chr1:53019604-53020604	8.17394	0.528639	0.766145	0.689999	0.490195	0.999637	3	10	6	0	20	21	4.74579	16.3641	5.66158	0	9.22935	13.0429
853	Chr1:53118008-53119008	8.46492	0.469904	0.694486	0.67662	0.498647	0.999637	7	7	2	4	19	20	11.0735	11.4548	1.88719	5.18426	8.76788	12.4218
854	Chr1:53243961-53244961	12.4409	0.143724	0.546965	0.262766	0.792731	0.999637	4	10	19	8	23	21	6.32773	16.3641	17.9283	10.3685	10.6138	13.0429
855	Chr1:53353362-53354362	59.2632	0.175765	0.249605	0.704175	0.481324	0.999637	39	40	63	55	100	83	61.6953	65.4563	59.4466	71.2836	46.1467	51.5504
856	Chr1:53353440-53354440	59.2813	0.152806	0.248849	0.614053	0.53918	0.999637	39	40	64	54	101	83	61.6953	65.4563	60.3902	69.9876	46.6082	51.5504
857	Chr1:53369969-53370969	37.6536	-0.389481	0.287975	-1.35248	0.176221	0.999637	24	17	55	30	83	50	37.9664	27.8189	51.8978	38.882	38.3018	31.0545
858	Chr1:53409096-53410096	33.0326	-0.0127186	0.315275	-0.0403414	0.967821	0.999637	21	14	41	36	61	46	33.2206	22.9097	38.6875	46.6584	28.1495	28.5701
859	Chr1:53622041-53623041	4.96078	0.394934	0.867903	0.455044	0.649078	0.999637	5	6	1	2	9	7	7.90966	9.81844	0.943597	2.59213	4.15321	4.34763
860	Chr1:53841568-53842568	32.591	-0.20406	0.302269	-0.675096	0.499614	0.999637	19	19	42	27	73	42	30.0567	31.0917	39.6311	34.9938	33.6871	26.0858
861	Chr1:54251512-54252512	32.5658	0.111105	0.304181	0.365261	0.714917	0.999637	19	20	26	27	83	56	30.0567	32.7281	24.5335	34.9938	38.3018	34.781
862	Chr1:54307028-54308028	34.0455	-0.200631	0.331616	-0.605009	0.545173	0.999637	24	19	47	34	57	33	37.9664	31.0917	44.349	44.0662	26.3036	20.496
863	Chr1:54495315-54496315	42.7635	0.00478093	0.284851	0.016784	0.986609	0.999637	31	32	39	37	88	48	49.0399	52.365	36.8003	47.9544	40.6091	29.8123
864	Chr1:54532310-54533310	4.70312	0.230771	0.826767	0.279125	0.780149	0.999637	2	5	4	2	12	8	3.16386	8.18203	3.77439	2.59213	5.53761	4.96872
865	Chr1:54614026-54615026	49.6483	-0.206531	0.277855	-0.743303	0.457298	0.999637	35	18	67	48	93	72	55.3676	29.4553	63.221	62.2112	42.9165	44.7184
866	Chr1:54982731-54983731	53.8103	-0.201768	0.250277	-0.806179	0.420139	0.999637	34	36	65	40	120	67	53.7857	58.9106	61.3338	51.8426	55.3761	41.613
867	Chr1:55083822-55084822	41.0866	-0.354454	0.276611	-1.28142	0.200047	0.999637	30	23	52	32	89	48	47.4579	37.6374	49.067	41.4741	41.0706	29.8123
868	Chr1:55109115-55110115	44.1269	-0.217366	0.272742	-0.796965	0.425471	0.999637	38	21	47	36	87	63	60.1134	34.3645	44.349	46.6584	40.1477	39.1286
869	Chr1:55144477-55145477	51.6553	-0.273043	0.270392	-1.0098	0.312589	0.999637	44	26	59	46	98	60	69.605	42.5466	55.6722	59.619	45.2238	37.2654
870	Chr1:55144587-55145587	49.4823	-0.199639	0.28227	-0.707262	0.479404	0.999637	41	31	58	42	85	53	64.8592	50.7286	54.7286	54.4348	39.2247	32.9177
871	Chr1:55187576-55188576	56.2086	-0.0303119	0.274074	-0.110597	0.911936	0.999637	43	37	66	50	88	66	68.0231	60.547	62.2774	64.8033	40.6091	40.9919
872	Chr1:55283126-55284126	20.5793	-0.273257	0.394526	-0.692621	0.488547	0.999637	18	8	23	17	41	31	28.4748	13.0913	21.7027	22.0331	18.9202	19.2538
873	Chr1:55293522-55294522	46.1112	-0.364666	0.29469	-1.23746	0.215918	0.999637	34	19	68	44	83	52	53.7857	31.0917	64.1646	57.0269	38.3018	32.2967
874	Chr1:55419813-55420813	32.9369	-0.204945	0.299015	-0.6854	0.493091	0.999637	21	18	35	28	83	44	33.2206	29.4553	33.0259	36.2898	38.3018	27.3279
875	Chr1:55462733-55463733	36.2706	-0.263369	0.284276	-0.926458	0.354208	0.999637	25	18	44	29	82	51	39.5483	29.4553	41.5183	37.5859	37.8403	31.6756
876	Chr1:5578075-5579075	18.7895	-0.337286	0.412442	-0.817778	0.413484	0.999637	12	9	21	11	53	33	18.9832	14.7277	19.8155	14.2567	24.4578	20.496
877	Chr1:56693795-56694795	6.06251	0.329554	0.758375	0.434553	0.663887	0.999637	3	7	4	3	15	9	4.74579	11.4548	3.77439	3.8882	6.92201	5.58981
878	Chr1:57034994-57035994	12.7233	0.299621	0.538707	0.556185	0.578084	0.999637	4	5	15	14	29	26	6.32773	8.18203	14.1539	18.1449	13.3826	16.1483
879	Chr1:57433965-57434965	51.1472	-0.359238	0.249656	-1.43893	0.15017	0.999637	39	25	61	38	117	70	61.6953	40.9102	57.5594	49.2505	53.9917	43.4763
880	Chr1:57462673-57463673	62.1999	-0.214529	0.251309	-0.853647	0.393301	0.999637	47	36	79	50	113	78	74.3508	58.9106	74.5441	64.8033	52.1458	48.445
881	Chr1:57463445-57464445	59.8268	-0.254546	0.249401	-1.02063	0.30743	0.999637	37	36	79	49	130	70	58.5315	58.9106	74.5441	63.5072	59.9908	43.4763
882	Chr1:57830507-57831507	23.5756	-0.144912	0.354244	-0.409075	0.682484	0.999637	15	16	28	14	52	37	23.729	26.1825	26.4207	18.1449	23.9963	22.9803
883	Chr1:58052316-58053316	45.9605	-0.322713	0.268163	-1.20342	0.228813	0.999637	34	21	61	38	93	61	53.7857	34.3645	57.5594	49.2505	42.9165	37.8865
884	Chr1:58075300-58076300	9.50364	0.481702	0.607924	0.792372	0.428144	0.999637	3	8	10	9	19	15	4.74579	13.0913	9.43597	11.6646	8.76788	9.31634
885	Chr1:58086276-58087276	27.4385	-0.0641908	0.352397	-0.182155	0.855461	0.999637	12	10	41	29	57	43	18.9832	16.3641	38.6875	37.5859	26.3036	26.7068
886	Chr1:58169475-58170475	12.2115	-0.478447	1.19177	-0.401458	0.688083	0.999637	14	7	13	0	19	30	22.147	11.4548	12.2668	0	8.76788	18.6327
887	Chr1:58266742-58267742	8.14569	1.26145	0.732105	1.72305	0.0848798	0.999637	1	6	2	8	21	25	1.58193	9.81844	1.88719	10.3685	9.69082	15.5272
888	Chr1:58334671-58335671	8.53438	0.736551	0.699229	1.05338	0.292169	0.999637	1	10	6	4	23	19	1.58193	16.3641	5.66158	5.18426	10.6138	11.8007
889	Chr1:58449481-58450481	26.0277	-0.14044	0.359349	-0.390819	0.695931	0.999637	20	12	26	29	55	28	31.6386	19.6369	24.5335	37.5859	25.3807	17.3905
890	Chr1:58480410-58481410	40.8004	-0.104506	0.280423	-0.372673	0.709392	0.999637	24	25	56	33	77	56	37.9664	40.9102	52.8414	42.7702	35.533	34.781
891	Chr1:58501496-58502496	52.7156	-0.131117	0.255364	-0.513452	0.607635	0.999637	35	30	64	47	106	67	55.3676	49.0922	60.3902	60.9151	48.9155	41.613
892	Chr1:58501830-58502830	70.7806	-0.201595	0.263432	-0.765265	0.444114	0.999637	50	36	97	67	123	83	79.0966	58.9106	91.5289	86.8364	56.7605	51.5504
893	Chr1:58561453-58562453	48.5585	-0.0546458	0.280755	-0.194639	0.845676	0.999637	29	23	62	53	94	60	45.876	37.6374	58.503	68.6915	43.3779	37.2654
894	Chr1:58642667-58643667	51.6092	-0.304853	0.257391	-1.1844	0.236255	0.999637	32	29	75	37	107	70	50.6218	47.4558	70.7697	47.9544	49.377	43.4763
895	Chr1:58642729-58643729	53.9082	-0.288802	0.255486	-1.1304	0.258308	0.999637	33	31	79	38	110	74	52.2037	50.7286	74.5441	49.2505	50.7614	45.9606
896	Chr1:58752333-58753333	8.40144	0.13207	0.642342	0.205607	0.837098	0.999637	5	6	8	4	19	18	7.90966	9.81844	7.54877	5.18426	8.76788	11.1796
897	Chr1:58767853-58768853	27.4046	-0.593614	0.342856	-1.73138	0.0833836	0.999637	19	9	42	15	68	47	30.0567	14.7277	39.6311	19.441	31.3798	29.1912
898	Chr1:58851719-58852719	27.9252	-0.0870127	0.332355	-0.261806	0.793471	0.999637	24	19	25	20	55	38	37.9664	31.0917	23.5899	25.9213	25.3807	23.6014
899	Chr1:59029774-59030774	53.0006	-0.231717	0.25242	-0.917983	0.358628	0.999637	34	25	67	47	118	72	53.7857	40.9102	63.221	60.9151	54.4532	44.7184
900	Chr1:59029867-59030867	50.2006	-0.212997	0.252304	-0.84421	0.398552	0.999637	31	24	62	42	117	74	49.0399	39.2738	58.503	54.4348	53.9917	45.9606
901	Chr1:59059787-59060787	6.07586	1.1105	0.766055	1.44964	0.14716	0.999637	1	6	4	4	12	17	1.58193	9.81844	3.77439	5.18426	5.53761	10.5585
902	Chr1:59061569-59062569	7.34221	0.167888	0.709452	0.236645	0.812932	0.999637	4	8	6	2	18	13	6.32773	13.0913	5.66158	2.59213	8.30641	8.07416
903	Chr1:5906979-5907979	26.9954	-0.191167	0.33322	-0.573698	0.566172	0.999637	22	15	24	17	65	45	34.8025	24.5461	22.6463	22.0331	29.9954	27.949
904	Chr1:59151244-59152244	13.2945	0.453087	0.526282	0.860921	0.389282	0.999637	4	10	10	11	36	27	6.32773	16.3641	9.43597	14.2567	16.6128	16.7694
905	Chr1:59176703-59177703	35.5874	-0.257124	0.302206	-0.850823	0.394867	0.999637	19	14	54	29	78	58	30.0567	22.9097	50.9542	37.5859	35.9945	36.0232
906	Chr1:59219733-59220733	12.6699	0.982128	0.553719	1.77369	0.0761141	0.999637	4	13	6	9	27	30	6.32773	21.2733	5.66158	11.6646	12.4596	18.6327
907	Chr1:59293575-59294575	42.4034	0.0978723	0.273842	0.357405	0.720789	0.999637	27	23	42	44	87	60	42.7122	37.6374	39.6311	57.0269	40.1477	37.2654
908	Chr1:59313251-59314251	20.0246	0.189407	0.400091	0.473409	0.635922	0.999637	9	16	18	13	51	36	14.2374	26.1825	16.9847	16.8489	23.5348	22.3592
909	Chr1:59538492-59539492	44.999	-0.0396451	0.272785	-0.145335	0.884447	0.999637	28	19	55	45	90	69	44.2941	31.0917	51.8978	58.323	41.5321	42.8552
910	Chr1:59572609-59573609	29.3543	-0.0248163	0.318454	-0.0779276	0.937886	0.999637	20	18	29	27	63	38	31.6386	29.4553	27.3643	34.9938	29.0724	23.6014
911	Chr1:59727178-59728178	69.0677	-0.246011	0.240633	-1.02235	0.306615	0.999637	53	38	81	58	140	84	83.8424	62.1835	76.4313	75.1718	64.6054	52.1715
912	Chr1:59741354-59742354	58.8035	0.0161658	0.238777	0.0677025	0.946022	0.999637	34	36	71	47	118	93	53.7857	58.9106	66.9954	60.9151	54.4532	57.7613
913	Chr1:59820982-59821982	38.9687	-0.250502	0.296383	-0.845197	0.398001	0.999637	25	23	56	33	73	44	39.5483	37.6374	52.8414	42.7702	33.6871	27.3279
914	Chr1:59969351-59970351	41.7918	-0.0219985	0.268835	-0.081829	0.934783	0.999637	30	26	39	34	91	61	47.4579	42.5466	36.8003	44.0662	41.9935	37.8865
915	Chr1:60099431-60100431	42.4561	-0.516366	0.273755	-1.88624	0.0592633	0.999637	36	18	49	24	107	67	56.9495	29.4553	46.2362	31.1056	49.377	41.613
916	Chr1:60154592-60155592	56.0702	-0.220162	0.255504	-0.861677	0.388865	0.999637	40	37	64	45	120	62	63.2773	60.547	60.3902	58.323	55.3761	38.5075
917	Chr1:60154989-60155989	51.7238	0.0916401	0.258391	0.354657	0.722846	0.999637	32	40	53	43	103	66	50.6218	65.4563	50.0106	55.7308	47.5311	40.9919
918	Chr1:60236944-60237944	53.8993	-0.1902	0.277166	-0.686231	0.492567	0.999637	39	21	65	58	108	66	61.6953	34.3645	61.3338	75.1718	49.8385	40.9919
919	Chr1:60399668-60400668	46.7698	-0.18834	0.276525	-0.681094	0.495812	0.999637	24	22	64	46	107	60	37.9664	36.0009	60.3902	59.619	49.377	37.2654
920	Chr1:60466040-60467040	47.7411	-0.134273	0.266336	-0.504149	0.614157	0.999637	34	25	62	39	85	70	53.7857	40.9102	58.503	50.5466	39.2247	43.4763
921	Chr1:60623448-60624448	42.2866	-0.251077	0.277944	-0.903339	0.366346	0.999637	27	23	58	36	86	52	42.7122	37.6374	54.7286	46.6584	39.6862	32.2967
922	Chr1:60773145-60774145	9.58273	-0.213723	0.662446	-0.322627	0.746978	0.999637	9	4	3	6	31	19	14.2374	6.54563	2.83079	7.7764	14.3055	11.8007
923	Chr1:60943345-60944345	8.34181	0.890578	0.68283	1.30425	0.19215	0.999637	5	8	5	3	12	24	7.90966	13.0913	4.71798	3.8882	5.53761	14.9061
924	Chr1:61034272-61035272	7.50261	0.406019	0.712534	0.569824	0.568797	0.999637	5	6	3	3	19	19	7.90966	9.81844	2.83079	3.8882	8.76788	11.8007
925	Chr1:61684899-61685899	27.2427	-0.0172828	0.335174	-0.0515639	0.958876	0.999637	16	14	28	17	68	57	25.3109	22.9097	26.4207	22.0331	31.3798	35.4021
926	Chr1:6195779-6196779	8.2335	0.428743	0.661157	0.648474	0.516678	0.999637	3	9	7	5	19	13	4.74579	14.7277	6.60518	6.48033	8.76788	8.07416
927	Chr1:6204873-6205873	48.6557	0.11781	0.260362	0.452485	0.65092	0.999637	30	27	57	46	86	76	47.4579	44.183	53.785	59.619	39.6862	47.2028
928	Chr1:62749360-62750360	52.2788	-0.177546	0.252208	-0.703966	0.481454	0.999637	30	33	61	42	127	67	47.4579	54.0014	57.5594	54.4348	58.6064	41.613
929	Chr1:63160741-63161741	41.2297	-0.294323	0.282363	-1.04236	0.297247	0.999637	23	22	61	34	89	52	36.3844	36.0009	57.5594	44.0662	41.0706	32.2967
930	Chr1:63222896-63223896	65.6659	-0.0248343	0.244708	-0.101485	0.919165	0.999637	44	41	72	61	130	81	69.605	67.0927	67.939	79.06	59.9908	50.3082
931	Chr1:63222900-63223900	65.4052	-0.0234977	0.245575	-0.0956844	0.923771	0.999637	44	41	71	61	130	80	69.605	67.0927	66.9954	79.06	59.9908	49.6872
932	Chr1:63260617-63261617	18.535	0.575788	0.467497	1.23164	0.218084	0.999637	3	9	26	25	31	33	4.74579	14.7277	24.5335	32.4016	14.3055	20.496
933	Chr1:63319340-63320340	34.5815	0.0330887	0.293763	0.112637	0.910318	0.999637	19	23	36	31	79	47	30.0567	37.6374	33.9695	40.178	36.4559	29.1912
934	Chr1:63491966-63492966	44.1547	-0.366889	0.2687	-1.36542	0.172121	0.999637	30	21	63	29	95	68	47.4579	34.3645	59.4466	37.5859	43.8394	42.2341
935	Chr1:63733001-63734001	9.88851	0.278701	0.634767	0.43906	0.660618	0.999637	8	6	4	5	24	25	12.6555	9.81844	3.77439	6.48033	11.0752	15.5272
936	Chr1:63776392-63777392	34.2116	0.016211	0.305174	0.0531206	0.957636	0.999637	20	19	46	32	59	49	31.6386	31.0917	43.4054	41.4741	27.2266	30.4334
937	Chr1:63776689-63777689	55.9611	-0.231727	0.267371	-0.866686	0.386114	0.999637	35	33	79	49	108	62	55.3676	54.0014	74.5441	63.5072	49.8385	38.5075
938	Chr1:63815341-63816341	10.3275	1.42215	0.692809	2.05273	0.0400991	0.999637	0	13	4	7	24	27	0	21.2733	3.77439	9.07246	11.0752	16.7694
939	Chr1:64168356-64169356	47.977	-0.10433	0.262425	-0.397562	0.690953	0.999637	30	22	54	47	109	68	47.4579	36.0009	50.9542	60.9151	50.3	42.2341
940	Chr1:64578879-64579879	48.6291	-0.0742285	0.260983	-0.284419	0.77609	0.999637	32	26	50	47	110	64	50.6218	42.5466	47.1798	60.9151	50.7614	39.7497
941	Chr1:64663316-64664316	56.7844	-0.154353	0.273599	-0.564157	0.572647	0.999637	38	35	69	55	113	56	60.1134	57.2742	65.1082	71.2836	52.1458	34.781
942	Chr1:64736530-64737530	39.321	-0.469249	0.317526	-1.47783	0.139454	0.999637	27	13	67	35	70	50	42.7122	21.2733	63.221	45.3623	32.3027	31.0545
943	Chr1:6476813-6477813	9.02284	0.928464	0.649947	1.42852	0.153142	0.999637	6	9	4	5	13	22	9.49159	14.7277	3.77439	6.48033	5.99908	13.664
944	Chr1:64783824-64784824	42.116	-0.215674	0.285636	-0.755066	0.450209	0.999637	34	23	48	38	80	48	53.7857	37.6374	45.2926	49.2505	36.9174	29.8123
945	Chr1:65002898-65003898	33.5287	0.0968919	0.301475	0.321393	0.747912	0.999637	15	22	41	31	71	48	23.729	36.0009	38.6875	40.178	32.7642	29.8123
946	Chr1:65078833-65079833	12.0065	0.512556	0.567704	0.902858	0.366601	0.999637	8	10	5	7	27	27	12.6555	16.3641	4.71798	9.07246	12.4596	16.7694
947	Chr1:65097223-65098223	16.2216	-0.0109194	0.491484	-0.0222172	0.982275	0.999637	17	13	12	7	26	27	26.8928	21.2733	11.3232	9.07246	11.9982	16.7694
948	Chr1:65109526-65110526	17.5699	-0.0262131	0.454133	-0.0577213	0.953971	0.999637	17	14	15	11	28	23	26.8928	22.9097	14.1539	14.2567	12.9211	14.2851
949	Chr1:65119763-65120763	15.5451	0.0868509	0.508456	0.170813	0.864371	0.999637	10	17	15	4	32	25	15.8193	27.8189	14.1539	5.18426	14.767	15.5272
950	Chr1:65128362-65129362	12.6735	0.237825	0.534828	0.444676	0.656554	0.999637	5	7	14	8	30	31	7.90966	11.4548	13.2104	10.3685	13.844	19.2538
951	Chr1:65149447-65150447	20.1419	0.144716	0.405955	0.356482	0.72148	0.999637	14	15	20	9	38	42	22.147	24.5461	18.8719	11.6646	17.5358	26.0858
952	Chr1:65169288-65170288	11.6591	0.459811	0.56818	0.809269	0.41836	0.999637	4	12	9	7	29	21	6.32773	19.6369	8.49237	9.07246	13.3826	13.0429
953	Chr1:65232553-65233553	53.8913	-0.10631	0.271086	-0.392166	0.694936	0.999637	37	32	68	51	96	61	58.5315	52.365	64.1646	66.0994	44.3009	37.8865
954	Chr1:65232825-65233825	56.8086	-0.170649	0.270935	-0.629854	0.52879	0.999637	38	32	74	55	107	61	60.1134	52.365	69.8261	71.2836	49.377	37.8865
955	Chr1:65328131-65329131	6.87492	0.475799	0.712201	0.668069	0.50409	0.999637	2	5	5	5	19	16	3.16386	8.18203	4.71798	6.48033	8.76788	9.93743
956	Chr1:65972597-65973597	7.40165	1.30385	0.77582	1.68061	0.0928391	0.999637	1	9	1	7	19	15	1.58193	14.7277	0.943597	9.07246	8.76788	9.31634
957	Chr1:66221348-66222348	38.1777	-0.0417292	0.284094	-0.146885	0.883223	0.999637	20	17	47	35	87	64	31.6386	27.8189	44.349	45.3623	40.1477	39.7497
958	Chr1:66514442-66515442	28.448	-0.1247	0.355435	-0.350837	0.725711	0.999637	8	13	37	24	86	50	12.6555	21.2733	34.9131	31.1056	39.6862	31.0545
959	Chr1:66746906-66747906	34.0398	-0.00938483	0.311948	-0.0300846	0.976	0.999637	22	27	34	29	72	36	34.8025	44.183	32.0823	37.5859	33.2257	22.3592
960	Chr1:66863669-66864669	45.1033	-0.0538504	0.25953	-0.207492	0.835626	0.999637	32	28	44	35	99	67	50.6218	45.8194	41.5183	45.3623	45.6853	41.613
961	Chr1:66909351-66910351	31.2939	-0.176817	0.325989	-0.5424	0.587543	0.999637	12	16	48	28	73	44	18.9832	26.1825	45.2926	36.2898	33.6871	27.3279
962	Chr1:66991478-66992478	7.64842	0.4811	0.687886	0.69939	0.484308	0.999637	4	4	8	4	13	23	6.32773	6.54563	7.54877	5.18426	5.99908	14.2851
963	Chr1:67084946-67085946	32.3115	-0.245708	0.306619	-0.801344	0.422932	0.999637	22	19	43	25	64	41	34.8025	31.0917	40.5747	32.4016	29.5339	25.4647
964	Chr1:67169101-67170101	8.81919	0.198745	0.66083	0.300751	0.763605	0.999637	6	9	5	3	22	16	9.49159	14.7277	4.71798	3.8882	10.1523	9.93743
965	Chr1:69154133-69155133	23.7496	-0.371978	0.389142	-0.955892	0.339127	0.999637	14	4	29	22	69	42	22.147	6.54563	27.3643	28.5135	31.8413	26.0858
966	Chr1:69732034-69733034	7.51804	-0.221385	0.675297	-0.327833	0.743038	0.999637	4	4	7	5	24	13	6.32773	6.54563	6.60518	6.48033	11.0752	8.07416
967	Chr1:69873063-69874063	19.7215	-0.229433	0.407872	-0.562513	0.573767	0.999637	18	13	18	10	42	31	28.4748	21.2733	16.9847	12.9607	19.3816	19.2538
968	Chr1:70771790-70772790	7.1448	-0.382662	0.702238	-0.544917	0.58581	0.999637	7	2	6	5	18	13	11.0735	3.27281	5.66158	6.48033	8.30641	8.07416
969	Chr1:7078502-7079502	57.9305	-0.379846	0.242164	-1.56855	0.116754	0.999637	42	28	75	36	133	91	66.4411	45.8194	70.7697	46.6584	61.3752	56.5191
970	Chr1:71149220-71150220	32.3892	-0.0863586	0.315728	-0.273523	0.784452	0.999637	18	24	35	28	77	35	28.4748	39.2738	33.0259	36.2898	35.533	21.7381
971	Chr1:71460984-71461984	11.097	0.40117	0.565728	0.709121	0.478249	0.999637	6	7	7	9	27	24	9.49159	11.4548	6.60518	11.6646	12.4596	14.9061
972	Chr1:71603225-71604225	40.3567	-0.396212	0.280008	-1.415	0.157068	0.999637	30	21	57	27	81	55	47.4579	34.3645	53.785	34.9938	37.3789	34.1599
973	Chr1:71698912-71699912	54.9845	-0.388525	0.257642	-1.508	0.131554	0.999637	47	29	69	40	106	68	74.3508	47.4558	65.1082	51.8426	48.9155	42.2341
974	Chr1:71699274-71700274	54.3942	-0.26691	0.255643	-1.04407	0.296451	0.999637	46	34	62	32	106	79	72.7689	55.6378	58.503	41.4741	48.9155	49.0661
975	Chr1:72050363-72051363	4.88253	0.827391	0.888224	0.931511	0.351589	0.999637	2	6	1	1	13	13	3.16386	9.81844	0.943597	1.29607	5.99908	8.07416
976	Chr1:72258381-72259381	44.9918	-0.275625	0.26822	-1.02761	0.304134	0.999637	35	29	48	33	100	53	55.3676	47.4558	45.2926	42.7702	46.1467	32.9177
977	Chr1:72330388-72331388	43.7867	-0.00254857	0.294454	-0.00865523	0.993094	0.999754	27	21	60	46	71	59	42.7122	34.3645	56.6158	59.619	32.7642	36.6443
978	Chr1:72330444-72331444	41.2166	0.0560996	0.294621	0.190413	0.848985	0.999637	25	19	53	45	70	58	39.5483	31.0917	50.0106	58.323	32.3027	36.0232
979	Chr1:72353496-72354496	52.3805	-0.210832	0.290899	-0.724761	0.468599	0.999637	33	17	72	58	106	68	52.2037	27.8189	67.939	75.1718	48.9155	42.2341
980	Chr1:72583004-72584004	22.3983	-0.69184	0.380722	-1.81718	0.0691892	0.999637	15	7	33	12	64	37	23.729	11.4548	31.1387	15.5528	29.5339	22.9803
981	Chr1:72629326-72630326	46.4003	0.139872	0.281417	0.497027	0.61917	0.999637	22	29	57	50	90	58	34.8025	47.4558	53.785	64.8033	41.5321	36.0232
982	Chr1:72746638-72747638	12.0748	0.873723	0.589661	1.48174	0.13841	0.999637	3	8	6	9	31	37	4.74579	13.0913	5.66158	11.6646	14.3055	22.9803
983	Chr1:72757335-72758335	37.2995	-0.324035	0.284124	-1.14047	0.254092	0.999637	24	17	51	29	84	54	37.9664	27.8189	48.1234	37.5859	38.7633	33.5388
984	Chr1:72870578-72871578	39.7647	-0.187654	0.274559	-0.683474	0.494307	0.999637	25	18	45	33	98	63	39.5483	29.4553	42.4618	42.7702	45.2238	39.1286
985	Chr1:72920958-72921958	17.815	-0.0709098	0.427905	-0.165714	0.868382	0.999637	12	11	21	16	34	22	18.9832	18.0005	19.8155	20.7371	15.6899	13.664
986	Chr1:73061973-73062973	11.4329	0.526971	0.624757	0.843482	0.398959	0.999637	3	13	6	5	35	23	4.74579	21.2733	5.66158	6.48033	16.1514	14.2851
987	Chr1:74170521-74171521	41.6639	-0.0882107	0.269245	-0.327622	0.743197	0.999637	28	25	46	35	88	57	44.2941	40.9102	43.4054	45.3623	40.6091	35.4021
988	Chr1:74171616-74172616	15.7105	-0.0130234	0.462503	-0.0281585	0.977536	0.999637	13	9	15	10	30	29	20.5651	14.7277	14.1539	12.9607	13.844	18.0116
989	Chr1:74200064-74201064	10.4026	0.360162	0.602968	0.597315	0.550297	0.999637	5	4	7	9	28	27	7.90966	6.54563	6.60518	11.6646	12.9211	16.7694
990	Chr1:74240705-74241705	11.1315	0.10122	0.5966	0.169662	0.865276	0.999637	7	6	6	6	34	27	11.0735	9.81844	5.66158	7.7764	15.6899	16.7694
991	Chr1:74282572-74283572	42.6323	-0.169659	0.274117	-0.618929	0.535963	0.999637	27	21	47	41	102	55	42.7122	34.3645	44.349	53.1387	47.0697	34.1599
992	Chr1:74324625-74325625	11.5899	-0.00464473	0.571931	-0.00812114	0.99352	0.999754	5	8	11	5	35	25	7.90966	13.0913	10.3796	6.48033	16.1514	15.5272
993	Chr1:74330754-74331754	34.0276	-0.514764	0.299689	-1.71766	0.0858586	0.999637	24	14	48	27	80	42	37.9664	22.9097	45.2926	34.9938	36.9174	26.0858
994	Chr1:74331005-74332005	43.5085	-0.198505	0.27089	-0.732789	0.463687	0.999637	30	21	52	40	93	57	47.4579	34.3645	49.067	51.8426	42.9165	35.4021
995	Chr1:74351696-74352696	8.03554	0.124877	0.702663	0.17772	0.858943	0.999637	2	3	10	4	23	24	3.16386	4.90922	9.43597	5.18426	10.6138	14.9061
996	Chr1:74408183-74409183	13.595	0.0669507	0.530275	0.126256	0.899529	0.999637	5	4	20	13	29	29	7.90966	6.54563	18.8719	16.8489	13.3826	18.0116
997	Chr1:74421278-74422278	9.96497	-0.0427893	0.663662	-0.0644746	0.948592	0.999637	6	13	8	3	26	9	9.49159	21.2733	7.54877	3.8882	11.9982	5.58981
998	Chr1:74437584-74438584	44.0765	0.00490253	0.294168	0.0166657	0.986703	0.999637	22	26	64	44	77	55	34.8025	42.5466	60.3902	57.0269	35.533	34.1599
999	Chr1:74455451-74456451	12.3286	-0.376042	0.53006	-0.709433	0.478056	0.999637	8	6	15	7	33	21	12.6555	9.81844	14.1539	9.07246	15.2284	13.0429
1000	Chr1:74552133-74553133	48.7886	-0.0180561	0.260867	-0.0692157	0.944818	0.999637	33	34	46	41	108	62	52.2037	55.6378	43.4054	53.1387	49.8385	38.5075
1001	Chr1:74588963-74589963	14.7653	0.173134	0.496	0.34906	0.727044	0.999637	10	6	12	10	34	37	15.8193	9.81844	11.3232	12.9607	15.6899	22.9803
1002	Chr1:74590360-74591360	10.3155	0.209077	0.599199	0.348928	0.727143	0.999637	8	6	6	6	24	24	12.6555	9.81844	5.66158	7.7764	11.0752	14.9061
1003	Chr1:74634320-74635320	47.9884	-0.035661	0.267939	-0.133094	0.894119	0.999637	33	20	53	49	97	72	52.2037	32.7281	50.0106	63.5072	44.7623	44.7184
1004	Chr1:74634364-74635364	46.3645	-0.152903	0.282925	-0.540437	0.588895	0.999637	33	15	53	49	99	68	52.2037	24.5461	50.0106	63.5072	45.6853	42.2341
1005	Chr1:74647471-74648471	45.1111	-0.201332	0.296601	-0.678797	0.497266	0.999637	38	24	52	44	78	47	60.1134	39.2738	49.067	57.0269	35.9945	29.1912
1006	Chr1:74647520-74648520	43.097	-0.173135	0.297809	-0.581363	0.560996	0.999637	37	23	49	41	72	48	58.5315	37.6374	46.2362	53.1387	33.2257	29.8123
1007	Chr1:74707820-74708820	35.559	-0.177777	0.286806	-0.61985	0.535356	0.999637	23	23	37	23	89	54	36.3844	37.6374	34.9131	29.8095	41.0706	33.5388
1008	Chr1:74759649-74760649	53.3961	-0.1436	0.270928	-0.530031	0.59609	0.999637	48	38	52	36	96	68	75.9327	62.1835	49.067	46.6584	44.3009	42.2341
1009	Chr1:74795295-74796295	21.3936	-0.138207	0.386829	-0.357281	0.720881	0.999637	18	8	19	17	49	39	28.4748	13.0913	17.9283	22.0331	22.6119	24.2225
1010	Chr1:74817967-74818967	32.0014	0.176616	0.32362	0.545751	0.585237	0.999637	19	12	35	39	60	50	30.0567	19.6369	33.0259	50.5466	27.688	31.0545
1011	Chr1:74837591-74838591	19.3289	0.0605114	0.448038	0.135059	0.892566	0.999637	3	10	28	18	52	34	4.74579	16.3641	26.4207	23.3292	23.9963	21.117
1012	Chr1:74901009-74902009	34.4148	-0.187275	0.30341	-0.617235	0.53708	0.999637	18	20	51	28	70	46	28.4748	32.7281	48.1234	36.2898	32.3027	28.5701
1013	Chr1:74931493-74932493	25.5323	0.221015	0.345015	0.640596	0.521785	0.999637	14	12	24	21	58	56	22.147	19.6369	22.6463	27.2174	26.7651	34.781
1014	Chr1:74939217-74940217	28.9859	-0.0290701	0.313981	-0.0925857	0.926233	0.999637	17	17	30	24	69	45	26.8928	27.8189	28.3079	31.1056	31.8413	27.949
1015	Chr1:74981673-74982673	11.548	0.124102	0.555789	0.223291	0.823309	0.999637	7	4	12	13	24	20	11.0735	6.54563	11.3232	16.8489	11.0752	12.4218
1016	Chr1:74997746-74998746	32.1423	0.0304982	0.315571	0.0966445	0.923009	0.999637	25	25	28	16	66	56	39.5483	40.9102	26.4207	20.7371	30.4569	34.781
1017	Chr1:75092713-75093713	8.14575	0.533259	0.666936	0.799567	0.423962	0.999637	4	7	5	4	19	20	6.32773	11.4548	4.71798	5.18426	8.76788	12.4218
1018	Chr1:75129964-75130964	10.5974	0.00339595	0.630472	0.00538636	0.995702	0.999754	6	9	6	3	35	22	9.49159	14.7277	5.66158	3.8882	16.1514	13.664
1019	Chr1:75138771-75139771	37.4244	-0.436452	0.290675	-1.50151	0.133223	0.999637	27	18	48	32	87	41	42.7122	29.4553	45.2926	41.4741	40.1477	25.4647
1020	Chr1:75138861-75139861	39.3877	-0.375324	0.285943	-1.31258	0.189323	0.999637	28	19	50	35	89	44	44.2941	31.0917	47.1798	45.3623	41.0706	27.3279
1021	Chr1:75164721-75165721	38.8172	-0.0414072	0.277621	-0.14915	0.881435	0.999637	23	24	43	34	86	53	36.3844	39.2738	40.5747	44.0662	39.6862	32.9177
1022	Chr1:75176466-75177466	38.5073	-0.658061	0.295692	-2.22549	0.0260482	0.999637	31	16	61	26	78	46	49.0399	26.1825	57.5594	33.6977	35.9945	28.5701
1023	Chr1:75187997-75188997	44.6637	-0.1312	0.278071	-0.47182	0.637055	0.999637	27	19	53	47	101	59	42.7122	31.0917	50.0106	60.9151	46.6082	36.6443
1024	Chr1:75206853-75207853	45.8282	-0.13314	0.264147	-0.50404	0.614234	0.999637	33	23	55	39	89	67	52.2037	37.6374	51.8978	50.5466	41.0706	41.613
1025	Chr1:75206914-75207914	47.4128	-0.122616	0.258854	-0.473688	0.635722	0.999637	34	25	56	39	93	70	53.7857	40.9102	52.8414	50.5466	42.9165	43.4763
1026	Chr1:75215328-75216328	45.0691	-0.0610778	0.275748	-0.221499	0.824704	0.999637	24	23	57	46	97	59	37.9664	37.6374	53.785	59.619	44.7623	36.6443
1027	Chr1:75232541-75233541	45.5749	-0.113447	0.270005	-0.420166	0.674364	0.999637	27	22	56	45	99	61	42.7122	36.0009	52.8414	58.323	45.6853	37.8865
1028	Chr1:75260283-75261283	27.1358	0.107389	0.367224	0.292435	0.769954	0.999637	6	14	39	28	65	44	9.49159	22.9097	36.8003	36.2898	29.9954	27.3279
1029	Chr1:75274490-75275490	15.2617	1.01567	0.489838	2.07349	0.038127	0.999637	4	16	9	13	30	32	6.32773	26.1825	8.49237	16.8489	13.844	19.8749
1030	Chr1:75313712-75314712	25.8955	0.126077	0.333636	0.377889	0.705513	0.999637	13	18	28	20	57	43	20.5651	29.4553	26.4207	25.9213	26.3036	26.7068
1031	Chr1:75356405-75357405	25.3831	0.0700879	0.344505	0.203445	0.838787	0.999637	12	12	28	25	61	43	18.9832	19.6369	26.4207	32.4016	28.1495	26.7068
1032	Chr1:75371373-75372373	22.6907	-0.00316749	0.397793	-0.00796264	0.993647	0.999754	6	10	28	23	66	38	9.49159	16.3641	26.4207	29.8095	30.4569	23.6014
1033	Chr1:75432006-75433006	37.8818	-0.400274	0.292701	-1.36752	0.171464	0.999637	29	16	53	31	75	49	45.876	26.1825	50.0106	40.178	34.6101	30.4334
1034	Chr1:75446512-75447512	17.352	0.0177165	0.447529	0.0395874	0.968422	0.999637	15	10	12	10	39	35	23.729	16.3641	11.3232	12.9607	17.9972	21.7381
1035	Chr1:75475546-75476546	43.925	-0.223931	0.261445	-0.856515	0.391713	0.999637	27	24	51	33	109	65	42.7122	39.2738	48.1234	42.7702	50.3	40.3708
1036	Chr1:75475608-75476608	42.1784	-0.232479	0.268296	-0.866504	0.386214	0.999637	27	19	48	34	106	66	42.7122	31.0917	45.2926	44.0662	48.9155	40.9919
1037	Chr1:75502527-75503527	33.64	-0.437687	0.304691	-1.43649	0.150862	0.999637	21	14	50	28	77	43	33.2206	22.9097	47.1798	36.2898	35.533	26.7068
1038	Chr1:75503153-75504153	14.8036	-0.0198411	0.485072	-0.0409035	0.967373	0.999637	10	5	18	14	28	27	15.8193	8.18203	16.9847	18.1449	12.9211	16.7694
1039	Chr1:75517605-75518605	46.1624	-0.426497	0.286231	-1.49004	0.136213	0.999637	34	16	61	46	103	52	53.7857	26.1825	57.5594	59.619	47.5311	32.2967
1040	Chr1:75542342-75543342	42.5229	-0.0902093	0.278357	-0.324078	0.745879	0.999637	25	23	52	42	90	53	39.5483	37.6374	49.067	54.4348	41.5321	32.9177
1041	Chr1:77511163-77512163	55.0792	-0.137347	0.467928	-0.293521	0.769124	0.999637	38	21	76	65	90	62	60.1134	34.3645	71.7133	84.2443	41.5321	38.5075
1042	Chr1:78193209-78194209	22.4753	-0.0917423	0.374739	-0.244817	0.806598	0.999637	16	9	24	15	51	47	25.3109	14.7277	22.6463	19.441	23.5348	29.1912
1043	Chr1:78306422-78307422	33.5187	0.150323	0.304338	0.493934	0.621353	0.999637	19	21	30	35	76	45	30.0567	34.3645	28.3079	45.3623	35.0715	27.949
1044	Chr1:78484934-78485934	59.3931	-0.23759	0.251454	-0.944865	0.344728	0.999637	36	35	84	47	120	75	56.9495	57.2742	79.2621	60.9151	55.3761	46.5817
1045	Chr1:78507067-78508067	5.39906	0.825653	0.81234	1.01639	0.309445	0.999637	3	3	1	5	13	15	4.74579	4.90922	0.943597	6.48033	5.99908	9.31634
1046	Chr1:78508038-78509038	19.6907	0.191132	0.393778	0.48538	0.627407	0.999637	12	13	19	18	39	30	18.9832	21.2733	17.9283	23.3292	17.9972	18.6327
1047	Chr1:78653901-78654901	40.5679	0.0267273	0.278155	0.0960877	0.923451	0.999637	26	24	45	39	79	54	41.1302	39.2738	42.4618	50.5466	36.4559	33.5388
1048	Chr1:78654114-78655114	45.9986	-0.0134961	0.27611	-0.0488795	0.961015	0.999637	32	29	51	44	85	54	50.6218	47.4558	48.1234	57.0269	39.2247	33.5388
1049	Chr1:78813003-78814003	5.42148	0.497214	0.853474	0.582577	0.560178	0.999637	1	6	3	1	18	14	1.58193	9.81844	2.83079	1.29607	8.30641	8.69525
1050	Chr1:78964154-78965154	7.63136	0.36254	0.724281	0.500551	0.616687	0.999637	6	8	3	2	17	16	9.49159	13.0913	2.83079	2.59213	7.84495	9.93743
1051	Chr1:79436165-79437165	6.20886	0.552642	0.747669	0.739153	0.459814	0.999637	4	4	4	3	12	18	6.32773	6.54563	3.77439	3.8882	5.53761	11.1796
1052	Chr1:79668047-79669047	30.4472	-0.35585	0.310907	-1.14456	0.252393	0.999637	18	17	36	19	85	46	28.4748	27.8189	33.9695	24.6253	39.2247	28.5701
1053	Chr1:79772094-79773094	30.7156	-0.425919	0.308711	-1.37967	0.167689	0.999637	23	14	40	20	71	46	36.3844	22.9097	37.7439	25.9213	32.7642	28.5701
1054	Chr1:79772218-79773218	35.818	-0.408343	0.292254	-1.39722	0.162349	0.999637	25	17	52	24	76	52	39.5483	27.8189	49.067	31.1056	35.0715	32.2967
1055	Chr1:79854771-79855771	25.2969	-0.264913	0.347613	-0.762094	0.446004	0.999637	16	9	34	22	57	40	25.3109	14.7277	32.0823	28.5135	26.3036	24.8436
1056	Chr1:80214548-80215548	11.1155	0.685299	0.578861	1.18387	0.236463	0.999637	5	10	6	7	25	26	7.90966	16.3641	5.66158	9.07246	11.5367	16.1483
1057	Chr1:80336555-80337555	23.1113	-0.235177	0.362022	-0.64962	0.515937	0.999637	15	17	27	13	54	32	23.729	27.8189	25.4771	16.8489	24.9192	19.8749
1058	Chr1:80381263-80382263	8.10095	-0.185676	0.69432	-0.267422	0.789144	0.999637	5	5	6	2	27	19	7.90966	8.18203	5.66158	2.59213	12.4596	11.8007
1059	Chr1:80754628-80755628	32.9549	-0.0802999	0.298153	-0.269325	0.78768	0.999637	18	16	41	27	75	56	28.4748	26.1825	38.6875	34.9938	34.6101	34.781
1060	Chr1:81073026-81074026	8.51631	0.417042	0.643816	0.647765	0.517137	0.999637	2	5	10	8	19	18	3.16386	8.18203	9.43597	10.3685	8.76788	11.1796
1061	Chr1:82229188-82230188	7.32097	0.365082	0.762064	0.47907	0.631889	0.999637	5	5	2	2	21	22	7.90966	8.18203	1.88719	2.59213	9.69082	13.664
1062	Chr1:82287491-82288491	36.3612	0.191084	0.286526	0.666902	0.504835	0.999637	22	28	39	25	66	61	34.8025	45.8194	36.8003	32.4016	30.4569	37.8865
1063	Chr1:82312528-82313528	35.2733	0.061807	0.288006	0.214604	0.830076	0.999637	24	24	31	27	78	55	37.9664	39.2738	29.2515	34.9938	35.9945	34.1599
1064	Chr1:82582924-82583924	24.0618	0.191399	0.357696	0.535088	0.592589	0.999637	11	20	22	17	59	39	17.4012	32.7281	20.7591	22.0331	27.2266	24.2225
1065	Chr1:82582997-82583997	24.7365	0.185727	0.346952	0.535312	0.592434	0.999637	12	19	23	18	59	42	18.9832	31.0917	21.7027	23.3292	27.2266	26.0858
1066	Chr1:82720966-82721966	38.6492	-0.0798463	0.278326	-0.286881	0.774204	0.999637	20	22	50	30	86	62	31.6386	36.0009	47.1798	38.882	39.6862	38.5075
1067	Chr1:82764536-82765536	8.20299	0.185997	0.710036	0.261954	0.793357	0.999637	5	10	9	1	14	14	7.90966	16.3641	8.49237	1.29607	6.46054	8.69525
1068	Chr1:82835559-82836559	41.8188	-0.389396	0.278518	-1.3981	0.162083	0.999637	26	19	64	30	90	61	41.1302	31.0917	60.3902	38.882	41.5321	37.8865
1069	Chr1:83034523-83035523	25.5324	-0.147526	0.346511	-0.425746	0.670293	0.999637	20	12	31	21	46	39	31.6386	19.6369	29.2515	27.2174	21.2275	24.2225
1070	Chr1:83112842-83113842	7.58881	0.431943	0.743065	0.581299	0.561039	0.999637	6	7	2	2	18	19	9.49159	11.4548	1.88719	2.59213	8.30641	11.8007
1071	Chr1:83155828-83156828	16.0033	0.352351	0.45758	0.770031	0.441282	0.999637	7	10	17	18	31	24	11.0735	16.3641	16.0411	23.3292	14.3055	14.9061
1072	Chr1:83404275-83405275	16.8407	-0.249137	0.471778	-0.52808	0.597444	0.999637	12	3	17	14	46	35	18.9832	4.90922	16.0411	18.1449	21.2275	21.7381
1073	Chr1:84360255-84361255	10.065	0.93473	0.653663	1.42999	0.152721	0.999637	6	11	4	3	17	28	9.49159	18.0005	3.77439	3.8882	7.84495	17.3905
1074	Chr1:84692296-84693296	30.2758	0.174492	0.320795	0.543937	0.586485	0.999637	14	16	27	31	78	51	22.147	26.1825	25.4771	40.178	35.9945	31.6756
1075	Chr1:84835379-84836379	46.6619	-0.15741	0.263532	-0.597308	0.550302	0.999637	36	24	50	41	96	63	56.9495	39.2738	47.1798	53.1387	44.3009	39.1286
1076	Chr1:84835917-84836917	60.6962	-0.104925	0.238368	-0.440179	0.659808	0.999637	39	30	66	54	140	91	61.6953	49.0922	62.2774	69.9876	64.6054	56.5191
1077	Chr1:84931200-84932200	39.8147	-0.249209	0.283315	-0.879618	0.379066	0.999637	32	16	48	30	80	66	50.6218	26.1825	45.2926	38.882	36.9174	40.9919
1078	Chr1:85105928-85106928	2.15215	0.210574	1.09862	0.191671	0.848	0.999637	0	1	2	2	8	5	0	1.63641	1.88719	2.59213	3.69174	3.10545
1079	Chr1:85266641-85267641	3.38452	1.89515	1.03734	1.82694	0.067709	0.999637	1	5	0	3	5	7	1.58193	8.18203	0	3.8882	2.30734	4.34763
1080	Chr1:87494892-87495892	3.20122	2.17266	1.07513	2.02082	0.0432982	0.999637	0	5	1	3	4	7	0	8.18203	0.943597	3.8882	1.84587	4.34763
1081	Chr1:87496454-87497454	3.76975	0.625782	0.916555	0.682754	0.494762	0.999637	1	4	3	1	9	10	1.58193	6.54563	2.83079	1.29607	4.15321	6.21089
1082	Chr1:87546064-87547064	3.74828	1.21931	0.950719	1.28251	0.199663	0.999637	3	3	1	2	4	12	4.74579	4.90922	0.943597	2.59213	1.84587	7.45307
1083	Chr1:87674718-87675718	9.17095	0.457613	0.686284	0.666798	0.504901	0.999637	3	10	6	2	26	22	4.74579	16.3641	5.66158	2.59213	11.9982	13.664
1084	Chr1:87689517-87690517	27.179	0.0880482	0.333884	0.263709	0.792004	0.999637	19	12	29	27	50	45	30.0567	19.6369	27.3643	34.9938	23.0734	27.949
1085	Chr1:87790357-87791357	36.9517	-0.0697254	0.28237	-0.246929	0.804963	0.999637	27	21	41	27	73	60	42.7122	34.3645	38.6875	34.9938	33.6871	37.2654
1086	Chr1:87824559-87825559	13.1151	0.423148	0.610991	0.692561	0.488585	0.999637	7	15	5	3	37	28	11.0735	24.5461	4.71798	3.8882	17.0743	17.3905
1087	Chr1:87857130-87858130	13.1103	-0.21182	0.567447	-0.373286	0.708936	0.999637	8	12	10	3	42	22	12.6555	19.6369	9.43597	3.8882	19.3816	13.664
1088	Chr1:87912892-87913892	14.5462	-0.211571	0.495714	-0.426801	0.669525	0.999637	9	11	12	8	44	21	14.2374	18.0005	11.3232	10.3685	20.3046	13.0429
1089	Chr1:87941939-87942939	29.2066	0.0441187	0.323477	0.136389	0.891514	0.999637	13	16	39	21	63	57	20.5651	26.1825	36.8003	27.2174	29.0724	35.4021
1090	Chr1:87960463-87961463	37.4798	-0.0527082	0.282935	-0.186291	0.852217	0.999637	28	25	38	28	75	53	44.2941	40.9102	35.8567	36.2898	34.6101	32.9177
1091	Chr1:88008045-88009045	8.87654	0.23851	0.660839	0.360921	0.718159	0.999637	5	6	6	3	24	24	7.90966	9.81844	5.66158	3.8882	11.0752	14.9061
1092	Chr1:88050856-88051856	53.4026	-0.144631	0.259368	-0.557629	0.577098	0.999637	39	31	68	43	94	72	61.6953	50.7286	64.1646	55.7308	43.3779	44.7184
1093	Chr1:88199297-88200297	42.8037	-0.0416026	0.283551	-0.14672	0.883353	0.999637	24	23	52	45	90	52	37.9664	37.6374	49.067	58.323	41.5321	32.2967
1094	Chr1:88219343-88220343	11.0911	1.16639	0.582102	2.00375	0.0450972	0.999637	5	9	6	8	16	33	7.90966	14.7277	5.66158	10.3685	7.38348	20.496
1095	Chr1:88255530-88256530	53.2164	-0.291762	0.257696	-1.1322	0.257552	0.999637	35	28	75	43	107	68	55.3676	45.8194	70.7697	55.7308	49.377	42.2341
1096	Chr1:88284237-88285237	14.3605	0.517092	0.514344	1.00534	0.314732	0.999637	8	6	8	13	34	38	12.6555	9.81844	7.54877	16.8489	15.6899	23.6014
1097	Chr1:88369735-88370735	11.9899	0.133666	0.550134	0.24297	0.808029	0.999637	9	11	11	7	21	17	14.2374	18.0005	10.3796	9.07246	9.69082	10.5585
1098	Chr1:88422812-88423812	22.8951	-0.273801	0.383505	-0.713944	0.475262	0.999637	14	6	34	19	49	42	22.147	9.81844	32.0823	24.6253	22.6119	26.0858
1099	Chr1:88478704-88479704	60.4576	-0.231715	0.262256	-0.883545	0.376942	0.999637	46	31	79	54	107	73	72.7689	50.7286	74.5441	69.9876	49.377	45.3395
1100	Chr1:88478980-88479980	48.1884	-0.282407	0.287903	-0.980911	0.326637	0.999637	33	21	67	49	93	53	52.2037	34.3645	63.221	63.5072	42.9165	32.9177
1101	Chr1:88566647-88567647	45.5258	0.0992149	0.26305	0.377171	0.706046	0.999637	22	26	47	39	111	80	34.8025	42.5466	44.349	50.5466	51.2229	49.6872
1102	Chr1:88599880-88600880	59.7861	-0.124071	0.248152	-0.499979	0.61709	0.999637	40	31	79	49	110	90	63.2773	50.7286	74.5441	63.5072	50.7614	55.8981
1103	Chr1:88986003-88987003	11.8797	0.0619129	0.580656	0.106626	0.915086	0.999637	6	9	9	4	36	27	9.49159	14.7277	8.49237	5.18426	16.6128	16.7694
1104	Chr1:88997681-88998681	11.5899	1.22729	0.614078	1.99858	0.0456535	0.999637	4	15	3	7	23	26	6.32773	24.5461	2.83079	9.07246	10.6138	16.1483
1105	Chr1:89021084-89022084	12.9061	0.584796	0.577521	1.0126	0.311253	0.999637	8	11	5	5	30	35	12.6555	18.0005	4.71798	6.48033	13.844	21.7381
1106	Chr1:89052596-89053596	19.5311	0.592461	0.400889	1.47787	0.139443	0.999637	8	14	16	16	40	44	12.6555	22.9097	15.0975	20.7371	18.4587	27.3279
1107	Chr1:89086728-89087728	13.6238	0.197854	0.530633	0.372864	0.70925	0.999637	13	8	8	8	25	30	20.5651	13.0913	7.54877	10.3685	11.5367	18.6327
1108	Chr1:89101887-89102887	14.3396	0.304407	0.520392	0.584957	0.558576	0.999637	6	11	10	7	41	34	9.49159	18.0005	9.43597	9.07246	18.9202	21.117
1109	Chr1:89109990-89110990	47.1413	-0.240793	0.265078	-0.908384	0.363675	0.999637	30	33	57	34	107	55	47.4579	54.0014	53.785	44.0662	49.377	34.1599
1110	Chr1:89160439-89161439	38.7858	-0.495023	0.277055	-1.78673	0.0739811	0.999637	30	18	48	27	95	51	47.4579	29.4553	45.2926	34.9938	43.8394	31.6756
1111	Chr1:89223074-89224074	41.6288	-0.0276312	0.270292	-0.102227	0.918576	0.999637	26	26	47	36	86	57	41.1302	42.5466	44.349	46.6584	39.6862	35.4021
1112	Chr1:89290804-89291804	7.60346	0.020372	0.734262	0.0277449	0.977866	0.999637	2	7	11	1	19	17	3.16386	11.4548	10.3796	1.29607	8.76788	10.5585
1113	Chr1:89366340-89367340	8.52182	-0.0708801	0.738401	-0.0959913	0.923527	0.999637	3	2	7	3	33	28	4.74579	3.27281	6.60518	3.8882	15.2284	17.3905
1114	Chr1:89405965-89406965	42.2147	-0.0825165	0.274575	-0.300525	0.763777	0.999637	28	24	45	24	98	82	44.2941	39.2738	42.4618	31.1056	45.2238	50.9293
1115	Chr1:89469945-89470945	12.5133	0.281145	0.555145	0.506436	0.612551	0.999637	8	12	11	4	24	26	12.6555	19.6369	10.3796	5.18426	11.0752	16.1483
1116	Chr1:89516388-89517388	13.3387	-0.353684	0.586967	-0.602562	0.5468	0.999637	15	8	4	6	39	22	23.729	13.0913	3.77439	7.7764	17.9972	13.664
1117	Chr1:89651946-89652946	47.8286	-0.352644	0.301034	-1.17144	0.241421	0.999637	32	17	75	48	87	57	50.6218	27.8189	70.7697	62.2112	40.1477	35.4021
1118	Chr1:89692543-89693543	9.96572	0.420956	0.602042	0.699215	0.484418	0.999637	5	10	8	5	21	19	7.90966	16.3641	7.54877	6.48033	9.69082	11.8007
1119	Chr1:89699756-89700756	11.542	0.488093	0.56201	0.868478	0.385133	0.999637	9	8	6	9	21	24	14.2374	13.0913	5.66158	11.6646	9.69082	14.9061
1120	Chr1:89749363-89750363	33.4769	-0.404224	0.310034	-1.30381	0.1923	0.999637	24	12	50	25	68	52	37.9664	19.6369	47.1798	32.4016	31.3798	32.2967
1121	Chr1:89904626-89905626	28.2894	-0.292941	0.319237	-0.917628	0.358814	0.999637	20	14	35	20	64	43	31.6386	22.9097	33.0259	25.9213	29.5339	26.7068
1122	Chr1:89951464-89952464	10.0022	0.673595	0.608326	1.10729	0.268167	0.999637	4	9	6	6	23	24	6.32773	14.7277	5.66158	7.7764	10.6138	14.9061
1123	Chr1:89966876-89967876	6.87953	0.384813	0.748072	0.514406	0.606968	0.999637	4	7	5	1	15	17	6.32773	11.4548	4.71798	1.29607	6.92201	10.5585
1124	Chr1:89983889-89984889	8.84386	0.410112	0.685065	0.598648	0.549408	0.999637	5	6	6	2	21	28	7.90966	9.81844	5.66158	2.59213	9.69082	17.3905
1125	Chr1:89991138-89992138	7.01416	0.256281	0.754048	0.339874	0.733951	0.999637	2	7	3	4	26	12	3.16386	11.4548	2.83079	5.18426	11.9982	7.45307
1126	Chr1:89999328-90000328	3.411	-0.527431	0.949357	-0.555567	0.578507	0.999637	3	2	2	1	12	6	4.74579	3.27281	1.88719	1.29607	5.53761	3.72654
1127	Chr1:90062088-90063088	9.01536	0.896595	0.678412	1.32161	0.186299	0.999637	1	12	7	5	20	17	1.58193	19.6369	6.60518	6.48033	9.22935	10.5585
1128	Chr1:90096677-90097677	8.68348	0.32177	0.685641	0.469299	0.638856	0.999637	3	6	6	3	27	25	4.74579	9.81844	5.66158	3.8882	12.4596	15.5272
1129	Chr1:90101823-90102823	20.0235	-0.443839	0.420622	-1.0552	0.291335	0.999637	10	11	28	7	59	38	15.8193	18.0005	26.4207	9.07246	27.2266	23.6014
1130	Chr1:90108035-90109035	30.6734	0.501189	0.357006	1.40386	0.160359	0.999637	19	24	12	20	75	69	30.0567	39.2738	11.3232	25.9213	34.6101	42.8552
1131	Chr1:90123062-90124062	22.7958	0.632138	0.379067	1.66762	0.0953918	0.999637	11	21	16	13	45	52	17.4012	34.3645	15.0975	16.8489	20.766	32.2967
1132	Chr1:90173708-90174708	83.3815	0.164412	0.268721	0.611834	0.540648	0.999637	52	59	101	84	125	96	82.2604	96.548	95.3033	108.87	57.6834	59.6246
1133	Chr1:90173737-90174737	79.5421	0.179949	0.269163	0.668552	0.503781	0.999637	48	56	96	82	122	91	75.9327	91.6388	90.5853	106.277	56.299	56.5191
1134	Chr1:90303037-90304037	13.5671	0.899599	0.598708	1.50257	0.13295	0.999637	9	15	2	6	27	33	14.2374	24.5461	1.88719	7.7764	12.4596	20.496
1135	Chr1:90405961-90406961	7.03442	0.438481	0.696908	0.629181	0.529231	0.999637	4	4	4	6	17	16	6.32773	6.54563	3.77439	7.7764	7.84495	9.93743
1136	Chr1:90598296-90599296	51.5356	-0.106324	0.255469	-0.416191	0.67727	0.999637	27	36	65	38	116	70	42.7122	58.9106	61.3338	49.2505	53.5302	43.4763
1137	Chr1:90966491-90967491	35.5119	-0.128015	0.292859	-0.437121	0.662024	0.999637	21	14	43	31	83	61	33.2206	22.9097	40.5747	40.178	38.3018	37.8865
1138	Chr1:91350882-91351882	54.7762	0.0339852	0.253976	0.133813	0.893551	0.999637	31	36	63	51	112	70	49.0399	58.9106	59.4466	66.0994	51.6844	43.4763
1139	Chr1:91826310-91827310	43.7418	-0.428232	0.279501	-1.53213	0.125489	0.999637	29	17	63	39	98	54	45.876	27.8189	59.4466	50.5466	45.2238	33.5388
1140	Chr1:91829365-91830365	7.42374	0.395889	1.77037	0.223619	0.823053	0.999637	0	0	9	11	23	18	0	0	8.49237	14.2567	10.6138	11.1796
1141	Chr1:91910741-91911741	12.7441	0.3858	0.561888	0.686613	0.492326	0.999637	6	11	8	5	34	31	9.49159	18.0005	7.54877	6.48033	15.6899	19.2538
1142	Chr1:92049476-92050476	17.2947	0.571495	0.468256	1.22048	0.222285	0.999637	2	14	20	17	38	31	3.16386	22.9097	18.8719	22.0331	17.5358	19.2538
1143	Chr1:92100056-92101056	25.4749	-0.0990548	0.341472	-0.290082	0.771754	0.999637	16	16	33	19	49	37	25.3109	26.1825	31.1387	24.6253	22.6119	22.9803
1144	Chr1:92499501-92500501	45.6651	-0.182282	0.295571	-0.616713	0.537424	0.999637	30	19	59	51	91	51	47.4579	31.0917	55.6722	66.0994	41.9935	31.6756
1145	Chr1:92571237-92572237	11.7641	0.611837	0.548326	1.11583	0.264496	0.999637	4	7	11	14	23	22	6.32773	11.4548	10.3796	18.1449	10.6138	13.664
1146	Chr1:92740029-92741029	9.53969	1.30517	0.717093	1.82009	0.0687454	0.999637	1	12	3	4	23	28	1.58193	19.6369	2.83079	5.18426	10.6138	17.3905
1147	Chr1:92811163-92812163	21.6736	0.179813	0.410555	0.437976	0.661404	0.999637	12	8	23	13	48	60	18.9832	13.0913	21.7027	16.8489	22.1504	37.2654
1148	Chr1:92849186-92850186	11.3959	0.363548	0.601415	0.604487	0.54552	0.999637	5	12	9	3	28	25	7.90966	19.6369	8.49237	3.8882	12.9211	15.5272
1149	Chr1:92865738-92866738	15.2788	0.542742	0.473456	1.14634	0.251653	0.999637	5	11	13	13	35	33	7.90966	18.0005	12.2668	16.8489	16.1514	20.496
1150	Chr1:9289459-9290459	34.1313	0.00941464	0.320596	0.029366	0.976573	0.999637	22	15	26	24	95	74	34.8025	24.5461	24.5335	31.1056	43.8394	45.9606
1151	Chr1:92894805-92895805	22.0193	-0.167249	0.406452	-0.411487	0.680716	0.999637	5	13	32	18	64	32	7.90966	21.2733	30.1951	23.3292	29.5339	19.8749
1152	Chr1:93041181-93042181	17.4908	0.0510961	0.457763	0.111621	0.911124	0.999637	14	11	22	15	21	24	22.147	18.0005	20.7591	19.441	9.69082	14.9061
1153	Chr1:93075900-93076900	22.7903	0.265547	0.369072	0.719499	0.471834	0.999637	11	18	20	14	54	45	17.4012	29.4553	18.8719	18.1449	24.9192	27.949
1154	Chr1:93146389-93147389	55.8693	-0.0909047	0.25834	-0.35188	0.724929	0.999637	40	32	71	47	95	77	63.2773	52.365	66.9954	60.9151	43.8394	47.8239
1155	Chr1:93194416-93195416	43.1872	-0.181407	0.293557	-0.617963	0.5366	0.999637	25	19	67	40	77	61	39.5483	31.0917	63.221	51.8426	35.533	37.8865
1156	Chr1:93218153-93219153	10.9189	-0.270717	0.593401	-0.456212	0.648237	0.999637	9	8	9	3	29	20	14.2374	13.0913	8.49237	3.8882	13.3826	12.4218
1157	Chr1:93247094-93248094	14.7364	-0.00429748	0.523206	-0.00821374	0.993446	0.999754	12	13	10	4	35	28	18.9832	21.2733	9.43597	5.18426	16.1514	17.3905
1158	Chr1:93262508-93263508	33.8393	-0.133119	0.302043	-0.44073	0.659408	0.999637	26	13	38	28	69	59	41.1302	21.2733	35.8567	36.2898	31.8413	36.6443
1159	Chr1:93294860-93295860	39.9602	-0.436432	0.296544	-1.47173	0.141095	0.999637	31	12	53	38	87	51	49.0399	19.6369	50.0106	49.2505	40.1477	31.6756
1160	Chr1:93310115-93311115	26.3041	-0.0768965	0.342963	-0.224212	0.822592	0.999637	16	13	25	27	67	35	25.3109	21.2733	23.5899	34.9938	30.9183	21.7381
1161	Chr1:93355407-93356407	29.3849	0.0681193	0.347628	0.195954	0.844646	0.999637	10	14	43	33	61	42	15.8193	22.9097	40.5747	42.7702	28.1495	26.0858
1162	Chr1:93390746-93391746	42.9378	-0.46548	0.272444	-1.70854	0.0875371	0.999637	36	17	54	31	95	61	56.9495	27.8189	50.9542	40.178	43.8394	37.8865
1163	Chr1:93436643-93437643	39.5427	-0.448883	0.294574	-1.52384	0.127549	0.999637	38	17	48	29	74	52	60.1134	27.8189	45.2926	37.5859	34.1486	32.2967
1164	Chr1:93697539-93698539	27.7322	0.04492	0.345967	0.129839	0.896694	0.999637	16	8	31	25	63	60	25.3109	13.0913	29.2515	32.4016	29.0724	37.2654
1165	Chr1:93827253-93828253	10.6514	0.763261	0.65237	1.16998	0.242009	0.999637	3	9	4	5	31	32	4.74579	14.7277	3.77439	6.48033	14.3055	19.8749
1166	Chr1:94044470-94045470	7.98333	0.929429	0.699572	1.32857	0.18399	0.999637	2	5	3	8	21	22	3.16386	8.18203	2.83079	10.3685	9.69082	13.664
1167	Chr1:94369937-94370937	56.6589	-0.326612	0.247574	-1.31925	0.187086	0.999637	44	25	70	45	120	80	69.605	40.9102	66.0518	58.323	55.3761	49.6872
1168	Chr1:94376696-94377696	6.59188	0.727925	0.774604	0.939739	0.347351	0.999637	1	4	3	5	21	20	1.58193	6.54563	2.83079	6.48033	9.69082	12.4218
1169	Chr1:94387830-94388830	7.03392	0.380656	0.742007	0.513009	0.607945	0.999637	3	7	7	1	15	18	4.74579	11.4548	6.60518	1.29607	6.92201	11.1796
1170	Chr1:94414592-94415592	11.5259	0.728542	0.609502	1.19531	0.231967	0.999637	3	11	5	7	33	28	4.74579	18.0005	4.71798	9.07246	15.2284	17.3905
1171	Chr1:94469203-94470203	11.084	0.826277	0.59708	1.38386	0.1664	0.999637	3	11	9	5	22	30	4.74579	18.0005	8.49237	6.48033	10.1523	18.6327
1172	Chr1:94484410-94485410	10.4184	0.026308	0.614743	0.0427951	0.965865	0.999637	8	5	6	5	29	26	12.6555	8.18203	5.66158	6.48033	13.3826	16.1483
1173	Chr1:94492599-94493599	8.92409	-0.0390185	0.657094	-0.0593804	0.952649	0.999637	7	5	6	3	24	22	11.0735	8.18203	5.66158	3.8882	11.0752	13.664
1174	Chr1:94503917-94504917	11.6141	0.503279	0.608856	0.826598	0.408465	0.999637	4	13	7	4	32	25	6.32773	21.2733	6.60518	5.18426	14.767	15.5272
1175	Chr1:94515959-94516959	9.12974	0.790171	0.738085	1.07057	0.284363	0.999637	1	9	3	4	31	26	1.58193	14.7277	2.83079	5.18426	14.3055	16.1483
1176	Chr1:94538062-94539062	41.5047	-0.0784129	0.289043	-0.271285	0.786172	0.999637	24	15	56	41	83	68	37.9664	24.5461	52.8414	53.1387	38.3018	42.2341
1177	Chr1:94544918-94545918	8.2913	0.0657919	0.645596	0.101909	0.918829	0.999637	3	5	9	6	23	16	4.74579	8.18203	8.49237	7.7764	10.6138	9.93743
1178	Chr1:94727723-94728723	45.054	0.0340438	0.279986	0.121591	0.903223	0.999637	20	19	53	46	110	76	31.6386	31.0917	50.0106	59.619	50.7614	47.2028
1179	Chr1:94798983-94799983	17.6233	0.156997	0.451033	0.348083	0.727778	0.999637	5	9	18	18	51	31	7.90966	14.7277	16.9847	23.3292	23.5348	19.2538
1180	Chr1:94803067-94804067	38.945	-0.390772	0.278017	-1.40557	0.159852	0.999637	26	23	50	27	93	48	41.1302	37.6374	47.1798	34.9938	42.9165	29.8123
1181	Chr1:94807483-94808483	39.8652	-0.281241	0.271813	-1.03469	0.300815	0.999637	28	21	46	26	96	63	44.2941	34.3645	43.4054	33.6977	44.3009	39.1286
1182	Chr1:94830454-94831454	41.6133	-0.284957	0.275748	-1.0334	0.301418	0.999637	25	24	55	34	95	50	39.5483	39.2738	51.8978	44.0662	43.8394	31.0545
1183	Chr1:94869197-94870197	10.3819	-0.114989	0.603281	-0.190607	0.848834	0.999637	8	8	6	5	30	17	12.6555	13.0913	5.66158	6.48033	13.844	10.5585
1184	Chr1:94902412-94903412	12.1005	0.486345	0.541427	0.898266	0.369044	0.999637	6	11	10	7	24	25	9.49159	18.0005	9.43597	9.07246	11.0752	15.5272
1185	Chr1:94997942-94998942	23.2898	0.337722	0.402001	0.840102	0.400851	0.999637	8	9	18	29	66	44	12.6555	14.7277	16.9847	37.5859	30.4569	27.3279
1186	Chr1:95031323-95032323	12.1018	0.343836	0.56319	0.610516	0.54152	0.999637	4	9	11	6	32	30	6.32773	14.7277	10.3796	7.7764	14.767	18.6327
1187	Chr1:95057025-95058025	12.6536	0.0771204	0.548372	0.140635	0.888158	0.999637	7	6	9	8	38	30	11.0735	9.81844	8.49237	10.3685	17.5358	18.6327
1188	Chr1:95111977-95112977	12.6952	0.621925	0.544103	1.14303	0.253027	0.999637	7	13	7	7	26	26	11.0735	21.2733	6.60518	9.07246	11.9982	16.1483
1189	Chr1:95131919-95132919	36.7878	0.0223012	0.28176	0.0791495	0.936914	0.999637	23	19	37	33	83	60	36.3844	31.0917	34.9131	42.7702	38.3018	37.2654
1190	Chr1:95201992-95202992	51.1827	0.0674296	0.275551	0.244708	0.806682	0.999637	33	32	61	52	86	61	52.2037	52.365	57.5594	67.3954	39.6862	37.8865
1191	Chr1:95238932-95239932	51.8796	-0.242265	0.265374	-0.912918	0.361286	0.999637	33	32	72	42	102	60	52.2037	52.365	67.939	54.4348	47.0697	37.2654
1192	Chr1:95239559-95240559	56.0326	-0.325446	0.260241	-1.25056	0.211097	0.999637	39	28	77	49	113	65	61.6953	45.8194	72.6569	63.5072	52.1458	40.3708
1193	Chr1:95269974-95270974	12.7404	0.332131	0.555909	0.597456	0.550203	0.999637	5	10	8	7	38	29	7.90966	16.3641	7.54877	9.07246	17.5358	18.0116
1194	Chr1:95317766-95318766	7.43125	1.32701	0.730184	1.81737	0.0691608	0.999637	2	8	2	5	15	21	3.16386	13.0913	1.88719	6.48033	6.92201	13.0429
1195	Chr1:9534990-9535990	59.5876	-0.110091	0.244419	-0.45042	0.652407	0.999637	46	37	67	43	111	87	72.7689	60.547	63.221	55.7308	51.2229	54.0348
1196	Chr1:95374885-95375885	52.1513	-0.314342	0.256355	-1.2262	0.220125	0.999637	42	29	62	40	106	64	66.4411	47.4558	58.503	51.8426	48.9155	39.7497
1197	Chr1:95375042-95376042	57.4519	-0.388576	0.248047	-1.56654	0.117221	0.999637	47	30	68	44	124	69	74.3508	49.0922	64.1646	57.0269	57.222	42.8552
1198	Chr1:9537530-9538530	39.4649	0.0221309	0.292645	0.0756238	0.939718	0.999637	26	20	51	38	64	58	41.1302	32.7281	48.1234	49.2505	29.5339	36.0232
1199	Chr1:95408157-95409157	40.2802	-0.244324	0.276634	-0.883205	0.377126	0.999637	21	24	55	29	96	57	33.2206	39.2738	51.8978	37.5859	44.3009	35.4021
1200	Chr1:95531799-95532799	43.86	0.0962242	0.269544	0.356989	0.7211	0.999637	25	30	44	41	95	58	39.5483	49.0922	41.5183	53.1387	43.8394	36.0232
1201	Chr1:95581772-95582772	51.727	-0.297632	0.257225	-1.15709	0.247235	0.999637	31	25	66	46	126	65	49.0399	40.9102	62.2774	59.619	58.1449	40.3708
1202	Chr1:95647578-95648578	10.01	0.071001	0.619553	0.1146	0.908762	0.999637	9	9	6	4	21	17	14.2374	14.7277	5.66158	5.18426	9.69082	10.5585
1203	Chr1:95650915-95651915	48.1964	-0.218542	0.252509	-0.865481	0.386775	0.999637	33	29	52	34	116	69	52.2037	47.4558	49.067	44.0662	53.5302	42.8552
1204	Chr1:95698011-95699011	55.1682	0.040515	0.250268	0.161886	0.871395	0.999637	28	31	69	51	114	84	44.2941	50.7286	65.1082	66.0994	52.6073	52.1715
1205	Chr1:95700043-95701043	44.4972	-0.26265	0.275708	-0.952639	0.340773	0.999637	26	19	66	37	93	67	41.1302	31.0917	62.2774	47.9544	42.9165	41.613
1206	Chr1:95721318-95722318	33.0781	-0.431693	0.312125	-1.38308	0.166641	0.999637	27	9	40	27	78	52	42.7122	14.7277	37.7439	34.9938	35.9945	32.2967
1207	Chr1:9590781-9591781	16.5845	0.0832791	0.453058	0.183816	0.854158	0.999637	9	11	19	8	36	36	14.2374	18.0005	17.9283	10.3685	16.6128	22.3592
1208	Chr1:95916571-95917571	13.5168	1.04621	0.622391	1.68095	0.0927721	0.999637	6	17	2	5	31	34	9.49159	27.8189	1.88719	6.48033	14.3055	21.117
1209	Chr1:95948630-95949630	15.3859	0.33947	0.474503	0.715422	0.474349	0.999637	8	12	10	14	38	24	12.6555	19.6369	9.43597	18.1449	17.5358	14.9061
1210	Chr1:9620756-9621756	11.8228	0.184019	0.56049	0.328319	0.742671	0.999637	7	8	14	5	21	28	11.0735	13.0913	13.2104	6.48033	9.69082	17.3905
1211	Chr1:9689790-9690790	51.1587	-0.309403	0.251897	-1.22829	0.219339	0.999637	36	27	66	39	110	68	56.9495	44.183	62.2774	50.5466	50.7614	42.2341
1212	Chr1:97209706-97210706	28.2824	0.0685585	0.320473	0.213929	0.830603	0.999637	18	21	26	20	63	44	28.4748	34.3645	24.5335	25.9213	29.0724	27.3279
1213	Chr1:9737963-9738963	45.627	-0.099882	0.271759	-0.367539	0.713217	0.999637	31	25	53	44	91	56	49.0399	40.9102	50.0106	57.0269	41.9935	34.781
1214	Chr1:97563671-97564671	27.726	-0.232827	0.329584	-0.706427	0.479923	0.999637	21	14	26	17	72	49	33.2206	22.9097	24.5335	22.0331	33.2257	30.4334
1215	Chr1:9787712-9788712	36.7084	-0.215445	0.289467	-0.744281	0.456707	0.999637	20	19	46	33	90	48	31.6386	31.0917	43.4054	42.7702	41.5321	29.8123
1216	Chr1:98768248-98769248	48.6912	-0.0128552	0.256086	-0.0501987	0.959964	0.999637	33	31	50	42	101	66	52.2037	50.7286	47.1798	54.4348	46.6082	40.9919
1217	Chr1:98893654-98894654	6.105	-0.0538195	0.76003	-0.0708124	0.943547	0.999637	2	3	6	3	21	15	3.16386	4.90922	5.66158	3.8882	9.69082	9.31634
1218	Chr1:9898220-9899220	30.3893	-0.223277	0.316205	-0.706116	0.480116	0.999637	25	14	31	19	69	55	39.5483	22.9097	29.2515	24.6253	31.8413	34.1599
1219	Chr1:99024330-99025330	6.54355	-0.0594855	0.718141	-0.0828326	0.933985	0.999637	5	3	5	4	17	14	7.90966	4.90922	4.71798	5.18426	7.84495	8.69525
1220	Chr1:9952390-9953390	9.90007	0.0332566	0.629366	0.0528414	0.957858	0.999637	6	10	6	4	29	15	9.49159	16.3641	5.66158	5.18426	13.3826	9.31634
1221	Chr1:99558151-99559151	35.2791	-0.178029	0.293776	-0.606	0.544514	0.999637	26	23	38	18	79	60	41.1302	37.6374	35.8567	23.3292	36.4559	37.2654
1222	Chr1:99666250-99667250	49.6727	-0.0752297	0.269827	-0.278807	0.780393	0.999637	28	28	61	50	106	59	44.2941	45.8194	57.5594	64.8033	48.9155	36.6443
1223	Chr1:99666488-99667488	44.8956	-0.0175697	0.270225	-0.0650188	0.948159	0.999637	24	30	58	38	89	60	37.9664	49.0922	54.7286	49.2505	41.0706	37.2654
1224	Chr1:9998717-9999717	25.2052	-0.216762	0.34014	-0.637274	0.523947	0.999637	16	15	27	19	64	35	25.3109	24.5461	25.4771	24.6253	29.5339	21.7381
1225	Chr1:99991723-99992723	46.1871	-0.368533	0.272982	-1.35002	0.177008	0.999637	27	20	72	35	100	68	42.7122	32.7281	67.939	45.3623	46.1467	42.2341
1226	Chr10:100051393-100052393	29.697	-0.0784209	0.333263	-0.235312	0.813967	0.999637	14	13	45	29	58	45	22.147	21.2733	42.4618	37.5859	26.7651	27.949
1227	Chr10:100054521-100055521	3.63765	1.05795	0.962346	1.09934	0.271619	0.999637	2	5	3	1	3	8	3.16386	8.18203	2.83079	1.29607	1.3844	4.96872
1228	Chr10:101143622-101144622	6.89576	0.375499	0.708917	0.529679	0.596334	0.999637	3	5	4	7	19	11	4.74579	8.18203	3.77439	9.07246	8.76788	6.83198
1229	Chr10:10191624-10192624	11.872	0.433267	0.631344	0.686262	0.492548	0.999637	2	4	7	14	42	28	3.16386	6.54563	6.60518	18.1449	19.3816	17.3905
1230	Chr10:101952552-101953552	5.31748	0.712	0.927591	0.767579	0.442737	0.999637	1	2	1	2	20	23	1.58193	3.27281	0.943597	2.59213	9.22935	14.2851
1231	Chr10:101974357-101975357	10.3985	0.646281	0.588592	1.09801	0.272199	0.999637	6	9	10	7	13	22	9.49159	14.7277	9.43597	9.07246	5.99908	13.664
1232	Chr10:102491154-102492154	17.8803	0.160168	0.419852	0.381487	0.702842	0.999637	8	11	19	15	42	32	12.6555	18.0005	17.9283	19.441	19.3816	19.8749
1233	Chr10:102491185-102492185	16.4314	0.203305	0.44657	0.455259	0.648923	0.999637	7	9	17	16	39	29	11.0735	14.7277	16.0411	20.7371	17.9972	18.0116
1234	Chr10:102698456-102699456	19.5405	-0.013492	0.414912	-0.0325177	0.974059	0.999637	8	7	25	18	49	38	12.6555	11.4548	23.5899	23.3292	22.6119	23.6014
1235	Chr10:10277531-10278531	26.9074	0.0557414	0.334246	0.166768	0.867553	0.999637	19	18	23	24	58	36	30.0567	29.4553	21.7027	31.1056	26.7651	22.3592
1236	Chr10:102829978-102830978	46.0999	-0.19655	0.265214	-0.741098	0.458634	0.999637	36	19	51	38	98	74	56.9495	31.0917	48.1234	49.2505	45.2238	45.9606
1237	Chr10:10400647-10401647	6.30326	0.585994	0.750961	0.780325	0.4352	0.999637	4	5	2	4	15	15	6.32773	8.18203	1.88719	5.18426	6.92201	9.31634
1238	Chr10:10406935-10407935	6.08181	0.765481	0.800465	0.956296	0.338923	0.999637	3	6	3	1	13	19	4.74579	9.81844	2.83079	1.29607	5.99908	11.8007
1239	Chr10:105011007-105012007	33.8527	-0.128762	0.292705	-0.439903	0.660008	0.999637	21	17	40	29	76	51	33.2206	27.8189	37.7439	37.5859	35.0715	31.6756
1240	Chr10:105277624-105278624	21.5596	0.265151	0.382863	0.692546	0.488594	0.999637	9	12	27	23	40	35	14.2374	19.6369	25.4771	29.8095	18.4587	21.7381
1241	Chr10:105277936-105278936	37.9004	0.292547	0.299354	0.97726	0.32844	0.999637	18	23	41	45	72	50	28.4748	37.6374	38.6875	58.323	33.2257	31.0545
1242	Chr10:105629326-105630326	9.07543	1.08169	0.690378	1.56681	0.11716	0.999637	4	11	2	4	19	23	6.32773	18.0005	1.88719	5.18426	8.76788	14.2851
1243	Chr10:105901822-105902822	4.53176	0.685814	0.867073	0.790953	0.428971	0.999637	1	1	4	4	11	16	1.58193	1.63641	3.77439	5.18426	5.07614	9.93743
1244	Chr10:106560224-106561224	20.6546	-0.186607	0.411801	-0.453147	0.650443	0.999637	6	10	33	16	53	35	9.49159	16.3641	31.1387	20.7371	24.4578	21.7381
1245	Chr10:106708400-106709400	28.1839	0.127622	0.319758	0.39912	0.689805	0.999637	17	18	29	19	59	54	26.8928	29.4553	27.3643	24.6253	27.2266	33.5388
1246	Chr10:106922690-106923690	8.8483	0.769931	0.697517	1.10382	0.269672	0.999637	1	7	4	7	28	23	1.58193	11.4548	3.77439	9.07246	12.9211	14.2851
1247	Chr10:106931285-106932285	9.68974	0.364072	0.629783	0.578092	0.563202	0.999637	7	4	6	6	21	28	11.0735	6.54563	5.66158	7.7764	9.69082	17.3905
1248	Chr10:107156583-107157583	5.88734	0.808823	0.8069	1.00238	0.316159	0.999637	5	5	4	2	5	17	7.90966	8.18203	3.77439	2.59213	2.30734	10.5585
1249	Chr10:107348690-107349690	6.24674	0.396683	0.77258	0.513452	0.607635	0.999637	4	4	3	2	16	19	6.32773	6.54563	2.83079	2.59213	7.38348	11.8007
1250	Chr10:107598750-107599750	52.0993	-0.0823814	0.253563	-0.324896	0.74526	0.999637	28	36	61	41	121	69	44.2941	58.9106	57.5594	53.1387	55.8376	42.8552
1251	Chr10:107768746-107769746	38.4842	-0.263978	0.294105	-0.897563	0.369418	0.999637	27	26	46	31	82	39	42.7122	42.5466	43.4054	40.178	37.8403	24.2225
1252	Chr10:10801654-10802654	10.9245	0.380497	0.588462	0.646596	0.517893	0.999637	6	5	8	7	26	31	9.49159	8.18203	7.54877	9.07246	11.9982	19.2538
1253	Chr10:108447538-108448538	27.0992	-0.134914	0.352361	-0.382887	0.701804	0.999637	12	9	32	28	76	44	18.9832	14.7277	30.1951	36.2898	35.0715	27.3279
1254	Chr10:10868726-10869726	36.4054	0.26707	0.287946	0.927498	0.353668	0.999637	18	23	40	37	69	56	28.4748	37.6374	37.7439	47.9544	31.8413	34.781
1255	Chr10:109436775-109437775	5.01649	0.736426	0.85243	0.863915	0.387635	0.999637	2	2	1	5	15	15	3.16386	3.27281	0.943597	6.48033	6.92201	9.31634
1256	Chr10:11000629-11001629	48.575	-0.0342835	0.261078	-0.131315	0.895526	0.999637	31	27	54	47	101	64	49.0399	44.183	50.9542	60.9151	46.6082	39.7497
1257	Chr10:110181996-110182996	44.2888	-0.13912	0.264614	-0.525748	0.599063	0.999637	26	24	57	37	95	64	41.1302	39.2738	53.785	47.9544	43.8394	39.7497
1258	Chr10:110356733-110357733	47.9979	-0.179687	0.258201	-0.695921	0.486478	0.999637	28	25	59	42	112	66	44.2941	40.9102	55.6722	54.4348	51.6844	40.9919
1259	Chr10:110446622-110447622	63.0308	-0.24402	0.238986	-1.02106	0.307225	0.999637	44	35	83	45	126	91	69.605	57.2742	78.3185	58.323	58.1449	56.5191
1260	Chr10:110562408-110563408	6.24219	0.224009	0.740762	0.302403	0.762345	0.999637	5	5	3	5	14	9	7.90966	8.18203	2.83079	6.48033	6.46054	5.58981
1261	Chr10:110601359-110602359	50.9431	-0.23434	0.26352	-0.889268	0.373859	0.999637	28	25	62	48	130	64	44.2941	40.9102	58.503	62.2112	59.9908	39.7497
1262	Chr10:11062703-11063703	39.0735	-0.358307	0.28422	-1.26067	0.207428	0.999637	25	17	50	23	101	70	39.5483	27.8189	47.1798	29.8095	46.6082	43.4763
1263	Chr10:110735236-110736236	52.1814	0.1497	0.25105	0.596296	0.550977	0.999637	32	33	53	50	102	75	50.6218	54.0014	50.0106	64.8033	47.0697	46.5817
1264	Chr10:110909749-110910749	42.1519	0.0374789	0.269685	0.138973	0.889472	0.999637	30	21	44	34	83	76	47.4579	34.3645	41.5183	44.0662	38.3018	47.2028
1265	Chr10:110937296-110938296	8.89514	0.563116	0.662078	0.850529	0.395031	0.999637	2	9	6	5	25	19	3.16386	14.7277	5.66158	6.48033	11.5367	11.8007
1266	Chr10:110942843-110943843	35.7027	-0.00334036	0.305811	-0.010923	0.991285	0.999737	18	20	53	32	62	53	28.4748	32.7281	50.0106	41.4741	28.611	32.9177
1267	Chr10:111409221-111410221	32.4345	-0.257709	0.315497	-0.816836	0.414022	0.999637	26	12	39	31	64	44	41.1302	19.6369	36.8003	40.178	29.5339	27.3279
1268	Chr10:111439187-111440187	9.6886	0.395447	0.611956	0.646201	0.518149	0.999637	7	7	5	10	20	14	11.0735	11.4548	4.71798	12.9607	9.22935	8.69525
1269	Chr10:111496746-111497746	6.93846	0.499334	0.737494	0.677068	0.498363	0.999637	4	3	2	9	19	13	6.32773	4.90922	1.88719	11.6646	8.76788	8.07416
1270	Chr10:111519911-111520911	7.18095	1.0723	0.765663	1.40049	0.161368	0.999637	2	10	2	3	17	16	3.16386	16.3641	1.88719	3.8882	7.84495	9.93743
1271	Chr10:111600178-111601178	8.61809	0.116686	0.638087	0.182869	0.854901	0.999637	4	7	9	4	21	17	6.32773	11.4548	8.49237	5.18426	9.69082	10.5585
1272	Chr10:111707680-111708680	19.3977	0.186002	0.423102	0.439616	0.660215	0.999637	9	8	15	20	55	38	14.2374	13.0913	14.1539	25.9213	25.3807	23.6014
1273	Chr10:112365582-112366582	34.4709	0.162187	0.31962	0.507439	0.611847	0.999637	19	21	48	34	49	49	30.0567	34.3645	45.2926	44.0662	22.6119	30.4334
1274	Chr10:11328522-11329522	3.79329	0.218469	0.875736	0.249469	0.802998	0.999637	2	2	4	3	8	8	3.16386	3.27281	3.77439	3.8882	3.69174	4.96872
1275	Chr10:114238863-114239863	21.4448	-0.175276	0.37803	-0.463656	0.642894	0.999637	12	10	23	17	59	36	18.9832	16.3641	21.7027	22.0331	27.2266	22.3592
1276	Chr10:114621578-114622578	8.37311	-0.352552	0.653967	-0.539098	0.58982	0.999637	6	2	8	7	25	15	9.49159	3.27281	7.54877	9.07246	11.5367	9.31634
1277	Chr10:114688049-114689049	34.4627	-0.247827	0.31666	-0.782629	0.433845	0.999637	24	23	43	30	69	32	37.9664	37.6374	40.5747	38.882	31.8413	19.8749
1278	Chr10:114752147-114753147	45.3416	0.151846	0.282481	0.537542	0.590893	0.999637	27	29	54	47	75	57	42.7122	47.4558	50.9542	60.9151	34.6101	35.4021
1279	Chr10:114798818-114799818	44.5338	-0.0776541	0.289227	-0.268488	0.788323	0.999637	25	22	64	45	80	58	39.5483	36.0009	60.3902	58.323	36.9174	36.0232
1280	Chr10:114820991-114821991	53.8301	-0.276854	0.25881	-1.06972	0.284746	0.999637	41	26	69	46	104	69	64.8592	42.5466	65.1082	59.619	47.9926	42.8552
1281	Chr10:114821516-114822516	54.3584	-0.300821	0.249835	-1.20408	0.22856	0.999637	39	28	73	39	110	78	61.6953	45.8194	68.8826	50.5466	50.7614	48.445
1282	Chr10:115006543-115007543	8.77059	0.603733	0.733537	0.823044	0.410483	0.999637	5	6	1	4	26	27	7.90966	9.81844	0.943597	5.18426	11.9982	16.7694
1283	Chr10:115024336-115025336	35.6676	0.0223445	0.296708	0.0753079	0.93997	0.999637	18	22	35	23	95	69	28.4748	36.0009	33.0259	29.8095	43.8394	42.8552
1284	Chr10:115253841-115254841	8.43145	0.352041	0.642745	0.547715	0.583888	0.999637	4	8	7	5	19	15	6.32773	13.0913	6.60518	6.48033	8.76788	9.31634
1285	Chr10:115454770-115455770	27.2081	-0.0744395	0.347546	-0.214186	0.830402	0.999637	13	9	36	29	63	44	20.5651	14.7277	33.9695	37.5859	29.0724	27.3279
1286	Chr10:115550473-115551473	17.7813	-0.174803	0.468066	-0.373457	0.708808	0.999637	5	6	25	13	54	38	7.90966	9.81844	23.5899	16.8489	24.9192	23.6014
1287	Chr10:115712080-115713080	7.74779	0.667487	0.684609	0.974991	0.329565	0.999637	5	7	7	4	9	18	7.90966	11.4548	6.60518	5.18426	4.15321	11.1796
1288	Chr10:115910434-115911434	38.1463	-0.0822484	0.275196	-0.298872	0.765038	0.999637	24	21	42	30	87	61	37.9664	34.3645	39.6311	38.882	40.1477	37.8865
1289	Chr10:116018067-116019067	47.5593	-0.16615	0.258251	-0.643366	0.519987	0.999637	29	21	56	40	114	77	45.876	34.3645	52.8414	51.8426	52.6073	47.8239
1290	Chr10:116333435-116334435	8.22334	0.104927	0.704112	0.14902	0.881538	0.999637	6	4	2	6	27	18	9.49159	6.54563	1.88719	7.7764	12.4596	11.1796
1291	Chr10:116386936-116387936	27.8048	-0.166152	0.333205	-0.498649	0.618026	0.999637	12	13	37	24	72	44	18.9832	21.2733	34.9131	31.1056	33.2257	27.3279
1292	Chr10:116409165-116410165	7.59365	0.912674	0.702934	1.29838	0.194158	0.999637	2	6	3	9	19	15	3.16386	9.81844	2.83079	11.6646	8.76788	9.31634
1293	Chr10:116422871-116423871	10.8207	0.528361	0.596679	0.885503	0.375885	0.999637	3	7	7	9	31	26	4.74579	11.4548	6.60518	11.6646	14.3055	16.1483
1294	Chr10:116481898-116482898	14.1503	-0.123006	0.494719	-0.248638	0.803641	0.999637	10	6	12	11	38	26	15.8193	9.81844	11.3232	14.2567	17.5358	16.1483
1295	Chr10:116500370-116501370	37.3426	-0.0936479	0.287295	-0.325965	0.744451	0.999637	20	20	47	35	83	51	31.6386	32.7281	44.349	45.3623	38.3018	31.6756
1296	Chr10:116585030-116586030	50.2068	-0.390179	0.27058	-1.44201	0.1493	0.999637	35	26	68	44	108	52	55.3676	42.5466	64.1646	57.0269	49.8385	32.2967
1297	Chr10:116661063-116662063	50.0365	-0.121015	0.258932	-0.467361	0.640241	0.999637	38	30	59	38	91	71	60.1134	49.0922	55.6722	49.2505	41.9935	44.0974
1298	Chr10:116675259-116676259	8.7552	0.258541	0.718572	0.359799	0.718997	0.999637	7	5	6	1	18	29	11.0735	8.18203	5.66158	1.29607	8.30641	18.0116
1299	Chr10:116683289-116684289	11.3691	0.0475307	0.594282	0.0799801	0.936253	0.999637	5	10	11	3	32	24	7.90966	16.3641	10.3796	3.8882	14.767	14.9061
1300	Chr10:116718877-116719877	9.21069	0.0405336	0.643883	0.0629519	0.949805	0.999637	6	5	6	4	27	23	9.49159	8.18203	5.66158	5.18426	12.4596	14.2851
1301	Chr10:116729424-116730424	9.42812	0.444712	0.617964	0.719641	0.471746	0.999637	6	8	5	6	21	19	9.49159	13.0913	4.71798	7.7764	9.69082	11.8007
1302	Chr10:116816571-116817571	7.47216	0.288789	0.675839	0.427304	0.669158	0.999637	5	6	7	4	13	15	7.90966	9.81844	6.60518	5.18426	5.99908	9.31634
1303	Chr10:117066057-117067057	38.0208	-0.501135	0.28583	-1.75326	0.0795575	0.999637	35	17	42	25	88	52	55.3676	27.8189	39.6311	32.4016	40.6091	32.2967
1304	Chr10:117147314-117148314	43.0418	-0.210921	0.291535	-0.723483	0.469383	0.999637	25	30	66	30	77	53	39.5483	49.0922	62.2774	38.882	35.533	32.9177
1305	Chr10:117182914-117183914	16.2652	-0.117831	0.480198	-0.245381	0.806162	0.999637	10	8	27	14	22	24	15.8193	13.0913	25.4771	18.1449	10.1523	14.9061
1306	Chr10:117229261-117230261	47.2838	-0.422831	0.295959	-1.42868	0.153096	0.999637	27	24	83	38	88	54	42.7122	39.2738	78.3185	49.2505	40.6091	33.5388
1307	Chr10:117282491-117283491	45.4213	-0.270791	0.268304	-1.00927	0.312846	0.999637	34	27	59	32	87	60	53.7857	44.183	55.6722	41.4741	40.1477	37.2654
1308	Chr10:117578344-117579344	36.0846	-0.015201	0.295948	-0.0513636	0.959036	0.999637	20	18	48	35	69	53	31.6386	29.4553	45.2926	45.3623	31.8413	32.9177
1309	Chr10:117641499-117642499	7.44146	0.739331	0.69535	1.06325	0.287668	0.999637	2	7	6	4	16	19	3.16386	11.4548	5.66158	5.18426	7.38348	11.8007
1310	Chr10:117731594-117732594	7.0803	0.910156	0.821018	1.10857	0.267616	0.999637	1	10	3	1	20	18	1.58193	16.3641	2.83079	1.29607	9.22935	11.1796
1311	Chr10:117877604-117878604	7.48206	0.819699	0.739482	1.10848	0.267656	0.999637	1	5	8	3	15	27	1.58193	8.18203	7.54877	3.8882	6.92201	16.7694
1312	Chr10:118297383-118298383	6.81074	0.622366	0.706939	0.880367	0.37866	0.999637	3	6	5	4	14	16	4.74579	9.81844	4.71798	5.18426	6.46054	9.93743
1313	Chr10:118305459-118306459	28.2403	-0.145105	0.326126	-0.444934	0.656367	0.999637	17	20	32	22	65	34	26.8928	32.7281	30.1951	28.5135	29.9954	21.117
1314	Chr10:118676611-118677611	51.8147	-0.150647	0.274271	-0.549263	0.582825	0.999637	39	35	64	42	89	58	61.6953	57.2742	60.3902	54.4348	41.0706	36.0232
1315	Chr10:118890591-118891591	47.6621	-0.140846	0.269255	-0.523095	0.600908	0.999637	30	26	65	42	89	63	47.4579	42.5466	61.3338	54.4348	41.0706	39.1286
1316	Chr10:119549543-119550543	46.6454	-0.242632	0.266198	-0.911471	0.362047	0.999637	29	23	66	38	95	66	45.876	37.6374	62.2774	49.2505	43.8394	40.9919
1317	Chr10:119638147-119639147	37.8025	-0.463405	0.29743	-1.55803	0.119226	0.999637	34	12	37	31	97	54	53.7857	19.6369	34.9131	40.178	44.7623	33.5388
1318	Chr10:119638686-119639686	25.8337	-0.447728	0.761453	-0.587992	0.556538	0.999637	20	2	29	29	67	39	31.6386	3.27281	27.3643	37.5859	30.9183	24.2225
1319	Chr10:119663627-119664627	37.6565	-0.268672	0.293704	-0.914774	0.36031	0.999637	22	24	54	29	78	44	34.8025	39.2738	50.9542	37.5859	35.9945	27.3279
1320	Chr10:119913025-119914025	51.3878	-0.176562	0.257405	-0.685931	0.492757	0.999637	36	26	63	46	103	68	56.9495	42.5466	59.4466	59.619	47.5311	42.2341
1321	Chr10:120202331-120203331	7.89894	-0.0806618	0.676939	-0.119157	0.905151	0.999637	2	6	11	4	22	14	3.16386	9.81844	10.3796	5.18426	10.1523	8.69525
1322	Chr10:120335657-120336657	30.3111	0.022697	0.311121	0.0729524	0.941844	0.999637	14	18	37	26	69	48	22.147	29.4553	34.9131	33.6977	31.8413	29.8123
1323	Chr10:120415888-120416888	46.265	-0.246733	0.266077	-0.927299	0.353771	0.999637	35	24	56	39	93	59	55.3676	39.2738	52.8414	50.5466	42.9165	36.6443
1324	Chr10:120470517-120471517	51.6104	-0.131944	0.262723	-0.502217	0.615515	0.999637	42	28	51	47	104	65	66.4411	45.8194	48.1234	60.9151	47.9926	40.3708
1325	Chr10:120747745-120748745	34.99	0.218007	0.292096	0.746354	0.455454	0.999637	22	18	34	36	67	58	34.8025	29.4553	32.0823	46.6584	30.9183	36.0232
1326	Chr10:120801647-120802647	52.4484	-0.104042	0.258382	-0.40267	0.687191	0.999637	34	22	60	52	115	77	53.7857	36.0009	56.6158	67.3954	53.0688	47.8239
1327	Chr10:120912806-120913806	43.692	-0.222281	0.290398	-0.765438	0.444011	0.999637	21	28	63	38	98	47	33.2206	45.8194	59.4466	49.2505	45.2238	29.1912
1328	Chr10:121023350-121024350	37.7735	-0.225906	0.285186	-0.792135	0.428282	0.999637	21	16	50	31	91	61	33.2206	26.1825	47.1798	40.178	41.9935	37.8865
1329	Chr10:121062872-121063872	47.5498	-0.313708	0.262029	-1.19723	0.231218	0.999637	32	27	63	37	102	58	50.6218	44.183	59.4466	47.9544	47.0697	36.0232
1330	Chr10:121078145-121079145	30.1678	0.0869843	0.320974	0.271001	0.78639	0.999637	16	15	29	33	73	44	25.3109	24.5461	27.3643	42.7702	33.6871	27.3279
1331	Chr10:121176494-121177494	52.7768	-0.187118	0.256694	-0.728954	0.46603	0.999637	33	30	70	45	107	67	52.2037	49.0922	66.0518	58.323	49.377	41.613
1332	Chr10:121483871-121484871	39.5665	-0.385277	0.27689	-1.39144	0.164091	0.999637	31	21	50	24	86	58	49.0399	34.3645	47.1798	31.1056	39.6862	36.0232
1333	Chr10:121533927-121534927	24.3086	-0.244674	0.346706	-0.705711	0.480368	0.999637	15	12	31	18	57	38	23.729	19.6369	29.2515	23.3292	26.3036	23.6014
1334	Chr10:121885056-121886056	21.4886	0.323832	0.399738	0.81011	0.417877	0.999637	9	7	21	25	50	45	14.2374	11.4548	19.8155	32.4016	23.0734	27.949
1335	Chr10:122115319-122116319	26.4644	-0.128936	0.350043	-0.368345	0.712616	0.999637	9	16	35	22	72	38	14.2374	26.1825	33.0259	28.5135	33.2257	23.6014
1336	Chr10:122513061-122514061	32.0891	-0.602299	0.311015	-1.93656	0.0527995	0.999637	21	13	50	24	77	39	33.2206	21.2733	47.1798	31.1056	35.533	24.2225
1337	Chr10:122633517-122634517	49.2535	0.0339919	0.254355	0.13364	0.893688	0.999637	30	27	58	44	96	77	47.4579	44.183	54.7286	57.0269	44.3009	47.8239
1338	Chr10:122700633-122701633	16.9129	-0.204613	0.444153	-0.460681	0.645028	0.999637	8	12	24	11	39	23	12.6555	19.6369	22.6463	14.2567	17.9972	14.2851
1339	Chr10:124765519-124766519	7.94889	0.688094	0.728388	0.944681	0.344822	0.999637	5	9	5	1	13	21	7.90966	14.7277	4.71798	1.29607	5.99908	13.0429
1340	Chr10:125402776-125403776	38.7392	-0.0016706	0.278837	-0.00599133	0.99522	0.999754	21	21	46	36	84	58	33.2206	34.3645	43.4054	46.6584	38.7633	36.0232
1341	Chr10:12588663-12589663	53.9822	-0.186499	0.256868	-0.726049	0.467809	0.999637	35	37	63	43	119	61	55.3676	60.547	59.4466	55.7308	54.9146	37.8865
1342	Chr10:126337927-126338927	36.3813	-0.0796428	0.288989	-0.275591	0.782862	0.999637	26	16	42	32	72	59	41.1302	26.1825	39.6311	41.4741	33.2257	36.6443
1343	Chr10:126415274-126416274	29.6244	-0.320377	0.336179	-0.952993	0.340593	0.999637	23	18	41	23	51	32	36.3844	29.4553	38.6875	29.8095	23.5348	19.8749
1344	Chr10:126437266-126438266	11.1529	-0.0104253	0.63173	-0.0165028	0.986833	0.999637	9	7	5	3	33	28	14.2374	11.4548	4.71798	3.8882	15.2284	17.3905
1345	Chr10:126467396-126468396	43.6637	-0.249864	0.282361	-0.884909	0.376206	0.999637	35	20	52	41	84	53	55.3676	32.7281	49.067	53.1387	38.7633	32.9177
1346	Chr10:126477971-126478971	59.2951	-0.525589	0.245376	-2.14197	0.032196	0.999637	51	27	76	40	129	77	80.6785	44.183	71.7133	51.8426	59.5293	47.8239
1347	Chr10:126478069-126479069	61.2516	-0.393503	0.246464	-1.5966	0.110356	0.999637	52	28	76	45	124	84	82.2604	45.8194	71.7133	58.323	57.222	52.1715
1348	Chr10:126484807-126485807	12.6884	0.254276	0.544839	0.466699	0.640715	0.999637	5	11	9	8	37	23	7.90966	18.0005	8.49237	10.3685	17.0743	14.2851
1349	Chr10:126496740-126497740	34.3047	-0.184993	0.302806	-0.610929	0.541247	0.999637	27	14	39	23	72	65	42.7122	22.9097	36.8003	29.8095	33.2257	40.3708
1350	Chr10:126500091-126501091	41.8653	-0.221794	0.315168	-0.703732	0.4816	0.999637	36	21	43	45	81	38	56.9495	34.3645	40.5747	58.323	37.3789	23.6014
1351	Chr10:126506817-126507817	59.8124	-0.055353	0.256231	-0.216027	0.828966	0.999637	38	39	75	53	110	72	60.1134	63.8199	70.7697	68.6915	50.7614	44.7184
1352	Chr10:126515464-126516464	14.9527	-0.35746	0.532313	-0.671522	0.501888	0.999637	9	2	13	13	53	30	14.2374	3.27281	12.2668	16.8489	24.4578	18.6327
1353	Chr10:126557716-126558716	32.6682	-0.340472	0.311507	-1.09298	0.274401	0.999637	25	20	43	24	63	37	39.5483	32.7281	40.5747	31.1056	29.0724	22.9803
1354	Chr10:126601748-126602748	39.1866	-0.114837	0.282035	-0.407174	0.68388	0.999637	29	21	48	31	71	59	45.876	34.3645	45.2926	40.178	32.7642	36.6443
1355	Chr10:126617201-126618201	14.5207	0.176826	0.482364	0.366583	0.71393	0.999637	7	8	13	13	37	27	11.0735	13.0913	12.2668	16.8489	17.0743	16.7694
1356	Chr10:126626610-126627610	25.0272	0.162028	0.388304	0.417272	0.67648	0.999637	4	15	35	24	63	42	6.32773	24.5461	33.0259	31.1056	29.0724	26.0858
1357	Chr10:126632284-126633284	36.3302	-0.0189778	0.288805	-0.0657115	0.947608	0.999637	22	25	45	28	69	51	34.8025	40.9102	42.4618	36.2898	31.8413	31.6756
1358	Chr10:126648178-126649178	48.7058	-0.242713	0.254592	-0.953341	0.340418	0.999637	29	27	65	35	110	72	45.876	44.183	61.3338	45.3623	50.7614	44.7184
1359	Chr10:126699636-126700636	27.4868	-0.194736	0.325261	-0.598706	0.549369	0.999637	19	12	30	22	66	45	30.0567	19.6369	28.3079	28.5135	30.4569	27.949
1360	Chr10:126702943-126703943	30.3884	-0.26177	0.323164	-0.810024	0.417926	0.999637	25	11	38	24	58	50	39.5483	18.0005	35.8567	31.1056	26.7651	31.0545
1361	Chr10:126725574-126726574	32.2558	-0.131275	0.306411	-0.428428	0.66834	0.999637	18	14	42	24	74	60	28.4748	22.9097	39.6311	31.1056	34.1486	37.2654
1362	Chr10:126727331-126728331	41.2305	-0.392081	0.283284	-1.38405	0.166342	0.999637	32	22	49	35	92	43	50.6218	36.0009	46.2362	45.3623	42.455	26.7068
1363	Chr10:126748342-126749342	57.7582	-0.0446813	0.265221	-0.168468	0.866215	0.999637	33	34	83	51	98	79	52.2037	55.6378	78.3185	66.0994	45.2238	49.0661
1364	Chr10:126758673-126759673	15.5941	0.145865	0.458772	0.317946	0.750526	0.999637	9	8	17	12	32	32	14.2374	13.0913	16.0411	15.5528	14.767	19.8749
1365	Chr10:126778145-126779145	30.4007	0.35324	0.87295	0.404652	0.685734	0.999637	3	11	41	44	78	45	4.74579	18.0005	38.6875	57.0269	35.9945	27.949
1366	Chr10:126788328-126789328	21.6737	-0.434599	0.378301	-1.14882	0.25063	0.999637	14	12	27	17	56	24	22.147	19.6369	25.4771	22.0331	25.8422	14.9061
1367	Chr10:126807100-126808100	18.7864	0.396816	0.439615	0.902643	0.366715	0.999637	6	7	20	25	42	34	9.49159	11.4548	18.8719	32.4016	19.3816	21.117
1368	Chr10:126816884-126817884	29.8748	0.251899	0.312574	0.805885	0.420309	0.999637	16	23	33	23	54	49	25.3109	37.6374	31.1387	29.8095	24.9192	30.4334
1369	Chr10:12683565-12684565	42.2924	-0.290329	0.266199	-1.09065	0.275429	0.999637	31	25	48	26	99	63	49.0399	40.9102	45.2926	33.6977	45.6853	39.1286
1370	Chr10:126938243-126939243	7.44021	0.358078	0.718075	0.498664	0.618016	0.999637	3	6	4	3	23	19	4.74579	9.81844	3.77439	3.8882	10.6138	11.8007
1371	Chr10:126951496-126952496	15.7619	-0.273318	0.461345	-0.592438	0.553557	0.999637	12	7	14	12	43	25	18.9832	11.4548	13.2104	15.5528	19.8431	15.5272
1372	Chr10:126958991-126959991	33.9315	-0.277517	0.305868	-0.907309	0.364243	0.999637	19	18	50	29	72	42	30.0567	29.4553	47.1798	37.5859	33.2257	26.0858
1373	Chr10:126971115-126972115	35.9523	-0.560337	0.297716	-1.88212	0.0598201	0.999637	20	14	56	24	96	53	31.6386	22.9097	52.8414	31.1056	44.3009	32.9177
1374	Chr10:127057704-127058704	42.5429	0.0114911	0.300378	0.0382555	0.969484	0.999637	19	18	61	47	84	62	30.0567	29.4553	57.5594	60.9151	38.7633	38.5075
1375	Chr10:127079543-127080543	33.0129	0.122966	0.305134	0.402988	0.686957	0.999637	18	23	35	32	68	42	28.4748	37.6374	33.0259	41.4741	31.3798	26.0858
1376	Chr10:127103458-127104458	44.3949	-0.104578	0.275916	-0.37902	0.704673	0.999637	33	16	48	42	93	73	52.2037	26.1825	45.2926	54.4348	42.9165	45.3395
1377	Chr10:127105124-127106124	31.8466	-0.304016	0.34628	-0.877948	0.379972	0.999637	20	11	52	33	55	39	31.6386	18.0005	49.067	42.7702	25.3807	24.2225
1378	Chr10:127141727-127142727	8.02508	0.271313	0.674469	0.402263	0.687491	0.999637	2	6	9	4	21	19	3.16386	9.81844	8.49237	5.18426	9.69082	11.8007
1379	Chr10:127161949-127162949	9.53392	0.405169	0.672128	0.602815	0.546632	0.999637	6	3	4	6	26	31	9.49159	4.90922	3.77439	7.7764	11.9982	19.2538
1380	Chr10:127176095-127177095	38.1231	-0.206381	0.307105	-0.67202	0.501571	0.999637	25	19	55	37	67	44	39.5483	31.0917	51.8978	47.9544	30.9183	27.3279
1381	Chr10:127188288-127189288	7.77644	0.348432	0.757062	0.460242	0.645343	0.999637	2	2	8	3	22	30	3.16386	3.27281	7.54877	3.8882	10.1523	18.6327
1382	Chr10:127196278-127197278	10.0626	1.04707	0.691196	1.51487	0.129805	0.999637	1	10	4	5	28	31	1.58193	16.3641	3.77439	6.48033	12.9211	19.2538
1383	Chr10:127196344-127197344	9.33745	1.0942	0.712161	1.53645	0.124428	0.999637	1	10	3	5	26	27	1.58193	16.3641	2.83079	6.48033	11.9982	16.7694
1384	Chr10:127237709-127238709	8.34848	1.32626	0.701383	1.89091	0.058636	0.999637	3	8	1	9	17	19	4.74579	13.0913	0.943597	11.6646	7.84495	11.8007
1385	Chr10:12727757-12728757	51.2491	-0.307474	0.254776	-1.20684	0.227493	0.999637	38	28	67	37	103	69	60.1134	45.8194	63.221	47.9544	47.5311	42.8552
1386	Chr10:127286485-127287485	9.41281	1.04868	0.657068	1.59601	0.110487	0.999637	5	5	2	10	19	27	7.90966	8.18203	1.88719	12.9607	8.76788	16.7694
1387	Chr10:127303031-127304031	9.97077	0.961455	0.692419	1.38855	0.164971	0.999637	5	7	5	2	18	40	7.90966	11.4548	4.71798	2.59213	8.30641	24.8436
1388	Chr10:127325595-127326595	10.0347	1.19935	0.647824	1.85136	0.0641184	0.999637	3	12	3	6	21	25	4.74579	19.6369	2.83079	7.7764	9.69082	15.5272
1389	Chr10:127335075-127336075	6.7711	-0.182254	0.716181	-0.254481	0.799124	0.999637	3	2	7	6	22	13	4.74579	3.27281	6.60518	7.7764	10.1523	8.07416
1390	Chr10:127437234-127438234	15.1349	0.743231	0.547648	1.35713	0.174739	0.999637	3	16	12	5	36	41	4.74579	26.1825	11.3232	6.48033	16.6128	25.4647
1391	Chr10:127448333-127449333	8.25037	-0.839787	0.680032	-1.23492	0.21686	0.999637	8	3	9	2	25	15	12.6555	4.90922	8.49237	2.59213	11.5367	9.31634
1392	Chr10:127451729-127452729	36.1329	0.0303419	0.315517	0.0961659	0.923389	0.999637	19	15	47	43	70	48	30.0567	24.5461	44.349	55.7308	32.3027	29.8123
1393	Chr10:127471903-127472903	59.9912	-0.256075	0.263049	-0.973489	0.33031	0.999637	50	28	76	51	103	80	79.0966	45.8194	71.7133	66.0994	47.5311	49.6872
1394	Chr10:127495511-127496511	43.0657	0.0403619	0.284826	0.141707	0.887311	0.999637	29	20	49	47	78	59	45.876	32.7281	46.2362	60.9151	35.9945	36.6443
1395	Chr10:127495547-127496547	44.0636	0.0907517	0.278292	0.326103	0.744347	0.999637	28	23	48	48	83	59	44.2941	37.6374	45.2926	62.2112	38.3018	36.6443
1396	Chr10:127519830-127520830	51.0444	-0.360049	0.275426	-1.30724	0.191131	0.999637	37	20	75	45	96	67	58.5315	32.7281	70.7697	58.323	44.3009	41.613
1397	Chr10:127616853-127617853	17.5646	0.0222639	0.43644	0.0510126	0.959315	0.999637	14	8	13	17	40	28	22.147	13.0913	12.2668	22.0331	18.4587	17.3905
1398	Chr10:127631014-127632014	48.4424	-0.254513	0.255622	-0.995664	0.319414	0.999637	31	30	59	36	112	62	49.0399	49.0922	55.6722	46.6584	51.6844	38.5075
1399	Chr10:127648350-127649350	41.475	-0.00600241	0.31417	-0.0191056	0.984757	0.999637	25	25	60	42	61	47	39.5483	40.9102	56.6158	54.4348	28.1495	29.1912
1400	Chr10:127662395-127663395	22.0246	-0.175658	0.373094	-0.470813	0.637774	0.999637	17	14	21	12	52	37	26.8928	22.9097	19.8155	15.5528	23.9963	22.9803
1401	Chr10:127668620-127669620	53.6295	-0.105127	0.245714	-0.427841	0.668767	0.999637	37	28	59	46	115	79	58.5315	45.8194	55.6722	59.619	53.0688	49.0661
1402	Chr10:127690688-127691688	14.4325	0.0497911	0.517108	0.0962877	0.923292	0.999637	12	5	8	12	37	31	18.9832	8.18203	7.54877	15.5528	17.0743	19.2538
1403	Chr10:127704554-127705554	8.79055	0.607505	0.653015	0.930308	0.352212	0.999637	6	7	3	6	19	20	9.49159	11.4548	2.83079	7.7764	8.76788	12.4218
1404	Chr10:127707130-127708130	49.3711	-0.224615	0.273944	-0.819931	0.412256	0.999637	31	23	72	45	93	65	49.0399	37.6374	67.939	58.323	42.9165	40.3708
1405	Chr10:127734640-127735640	22.2608	-0.161994	0.378789	-0.427662	0.668897	0.999637	17	9	20	15	57	44	26.8928	14.7277	18.8719	19.441	26.3036	27.3279
1406	Chr10:127739892-127740892	55.116	0.0583826	0.281399	0.207473	0.835641	0.999637	33	35	60	61	110	56	52.2037	57.2742	56.6158	79.06	50.7614	34.781
1407	Chr10:127759016-127760016	59.9952	-0.120043	0.247297	-0.485422	0.627377	0.999637	42	28	72	55	118	87	66.4411	45.8194	67.939	71.2836	54.4532	54.0348
1408	Chr10:127774389-127775389	59.8963	-0.221983	0.245232	-0.905196	0.365362	0.999637	38	25	77	51	134	93	60.1134	40.9102	72.6569	66.0994	61.8366	57.7613
1409	Chr10:127806588-127807588	14.8376	-0.262134	0.491106	-0.533763	0.593505	0.999637	12	11	19	7	26	21	18.9832	18.0005	17.9283	9.07246	11.9982	13.0429
1410	Chr10:127813672-127814672	52.6279	-0.262839	0.252958	-1.03906	0.298777	0.999637	35	34	69	36	110	68	55.3676	55.6378	65.1082	46.6584	50.7614	42.2341
1411	Chr10:127837780-127838780	9.54081	0.755415	0.631228	1.19674	0.231408	0.999637	4	10	5	5	21	22	6.32773	16.3641	4.71798	6.48033	9.69082	13.664
1412	Chr10:127848048-127849048	45.2338	-0.0899364	0.276359	-0.325433	0.744854	0.999637	30	22	58	44	83	61	47.4579	36.0009	54.7286	57.0269	38.3018	37.8865
1413	Chr10:127848173-127849173	52.6434	-0.049118	0.25711	-0.191039	0.848495	0.999637	33	29	64	50	103	70	52.2037	47.4558	60.3902	64.8033	47.5311	43.4763
1414	Chr10:127895793-127896793	48.8554	-0.150446	0.267052	-0.563359	0.573191	0.999637	36	23	60	45	91	67	56.9495	37.6374	56.6158	58.323	41.9935	41.613
1415	Chr10:127930431-127931431	56.7684	-0.225078	0.264289	-0.851637	0.394415	0.999637	40	31	77	50	103	67	63.2773	50.7286	72.6569	64.8033	47.5311	41.613
1416	Chr10:127935241-127936241	26.8204	-0.0998878	0.338872	-0.294766	0.768173	0.999637	13	17	39	21	54	38	20.5651	27.8189	36.8003	27.2174	24.9192	23.6014
1417	Chr10:127962426-127963426	48.8682	-0.280086	0.259233	-1.08044	0.279946	0.999637	35	28	64	36	98	64	55.3676	45.8194	60.3902	46.6584	45.2238	39.7497
1418	Chr10:127984330-127985330	37.6866	-0.193491	0.325704	-0.59407	0.552466	0.999637	32	15	44	42	64	41	50.6218	24.5461	41.5183	54.4348	29.5339	25.4647
1419	Chr10:127985861-127986861	47.8302	-0.34448	0.289669	-1.18922	0.234352	0.999637	39	28	67	37	78	52	61.6953	45.8194	63.221	47.9544	35.9945	32.2967
1420	Chr10:128002490-128003490	52.752	-0.270747	0.247508	-1.09389	0.274003	0.999637	41	27	54	39	126	77	64.8592	44.183	50.9542	50.5466	58.1449	47.8239
1421	Chr10:128026208-128027208	60.7818	0.128671	0.259733	0.495399	0.620319	0.999637	30	43	74	59	117	75	47.4579	70.3655	69.8261	76.4679	53.9917	46.5817
1422	Chr10:128051913-128052913	8.09765	-0.152186	0.704862	-0.215909	0.829059	0.999637	7	4	5	2	23	21	11.0735	6.54563	4.71798	2.59213	10.6138	13.0429
1423	Chr10:128063062-128064062	42.2751	-0.197235	0.285156	-0.691674	0.489142	0.999637	21	32	60	27	93	54	33.2206	52.365	56.6158	34.9938	42.9165	33.5388
1424	Chr10:128082547-128083547	17.1796	-0.0540057	0.442527	-0.122039	0.902868	0.999637	9	9	15	16	50	26	14.2374	14.7277	14.1539	20.7371	23.0734	16.1483
1425	Chr10:12809998-12810998	32.7112	-0.210925	0.590501	-0.357197	0.720944	0.999637	31	25	20	10	82	59	49.0399	40.9102	18.8719	12.9607	37.8403	36.6443
1426	Chr10:128110474-128111474	37.1172	-0.205391	0.284385	-0.722229	0.470154	0.999637	25	17	46	32	80	54	39.5483	27.8189	43.4054	41.4741	36.9174	33.5388
1427	Chr10:128132824-128133824	39.7485	-0.482631	0.274199	-1.76015	0.0783824	0.999637	30	18	51	27	96	55	47.4579	29.4553	48.1234	34.9938	44.3009	34.1599
1428	Chr10:128141607-128142607	55.6323	-0.398813	0.273075	-1.46045	0.144165	0.999637	41	21	82	50	106	70	64.8592	34.3645	77.3749	64.8033	48.9155	43.4763
1429	Chr10:128142815-128143815	13.4424	0.381394	0.530299	0.719205	0.472014	0.999637	3	9	12	12	38	27	4.74579	14.7277	11.3232	15.5528	17.5358	16.7694
1430	Chr10:128180612-128181612	41.7762	-0.107353	0.280438	-0.382806	0.701864	0.999637	25	20	47	43	97	54	39.5483	32.7281	44.349	55.7308	44.7623	33.5388
1431	Chr10:128184436-128185436	59.9674	-0.00226254	0.283916	-0.00796905	0.993642	0.999754	41	26	77	67	95	79	64.8592	42.5466	72.6569	86.8364	43.8394	49.0661
1432	Chr10:128227510-128228510	14.4483	0.784474	0.514511	1.5247	0.127334	0.999637	8	12	5	11	31	34	12.6555	19.6369	4.71798	14.2567	14.3055	21.117
1433	Chr10:128240926-128241926	46.6419	-0.349301	0.265968	-1.31332	0.189076	0.999637	37	19	57	39	100	64	58.5315	31.0917	53.785	50.5466	46.1467	39.7497
1434	Chr10:128242191-128243191	46.2258	0.0672541	0.279689	0.24046	0.809973	0.999637	28	21	56	51	84	66	44.2941	34.3645	52.8414	66.0994	38.7633	40.9919
1435	Chr10:128258187-128259187	54.3967	0.140408	0.269459	0.521073	0.602316	0.999637	37	34	58	57	91	67	58.5315	55.6378	54.7286	73.8758	41.9935	41.613
1436	Chr10:128258328-128259328	57.8528	0.143042	0.274651	0.520815	0.602495	0.999637	41	35	61	63	93	69	64.8592	57.2742	57.5594	81.6522	42.9165	42.8552
1437	Chr10:128328274-128329274	40.1635	0.103356	0.278046	0.371723	0.710099	0.999637	23	21	47	40	77	62	36.3844	34.3645	44.349	51.8426	35.533	38.5075
1438	Chr10:128345476-128346476	11.7202	-0.201155	0.567658	-0.35436	0.723069	0.999637	10	8	7	6	33	19	15.8193	13.0913	6.60518	7.7764	15.2284	11.8007
1439	Chr10:128359444-128360444	34.4654	-0.0531398	0.298303	-0.17814	0.858613	0.999637	25	15	40	31	65	56	39.5483	24.5461	37.7439	40.178	29.9954	34.781
1440	Chr10:128360591-128361591	20.1075	-0.215835	0.422277	-0.511121	0.609266	0.999637	17	5	25	15	37	41	26.8928	8.18203	23.5899	19.441	17.0743	25.4647
1441	Chr10:128370370-128371370	30.0515	0.0731151	0.317038	0.230619	0.817611	0.999637	14	14	37	29	66	52	22.147	22.9097	34.9131	37.5859	30.4569	32.2967
1442	Chr10:128397544-128398544	8.85831	0.210468	0.704499	0.298749	0.765132	0.999637	3	8	4	3	33	20	4.74579	13.0913	3.77439	3.8882	15.2284	12.4218
1443	Chr10:128426406-128427406	1.82939	-0.629884	1.2382	-0.508711	0.610955	0.999637	2	1	0	0	8	4	3.16386	1.63641	0	0	3.69174	2.48436
1444	Chr10:128447779-128448779	2.80698	0.916977	1.07484	0.853131	0.393587	0.999637	1	4	0	1	8	6	1.58193	6.54563	0	1.29607	3.69174	3.72654
1445	Chr10:128483617-128484617	4.40449	-0.157795	0.867981	-0.181796	0.855743	0.999637	3	1	2	4	16	9	4.74579	1.63641	1.88719	5.18426	7.38348	5.58981
1446	Chr10:128516613-128517613	5.12508	0.438599	0.885775	0.495159	0.620488	0.999637	2	3	5	0	12	20	3.16386	4.90922	4.71798	0	5.53761	12.4218
1447	Chr10:128530528-128531528	8.22999	0.107759	0.640135	0.168338	0.866317	0.999637	5	6	8	5	18	15	7.90966	9.81844	7.54877	6.48033	8.30641	9.31634
1448	Chr10:128549067-128550067	7.89449	1.48029	0.735701	2.01208	0.0442112	0.999637	4	10	2	3	10	23	6.32773	16.3641	1.88719	3.8882	4.61467	14.2851
1449	Chr10:128570322-128571322	4.92284	0.918931	0.82375	1.11555	0.264616	0.999637	2	3	2	4	11	15	3.16386	4.90922	1.88719	5.18426	5.07614	9.31634
1450	Chr10:128597538-128598538	8.95436	0.810105	0.657024	1.23299	0.217579	0.999637	2	10	11	5	12	19	3.16386	16.3641	10.3796	6.48033	5.53761	11.8007
1451	Chr10:128611610-128612610	2.61879	1.19925	1.11073	1.07969	0.28028	0.999637	1	5	1	1	4	3	1.58193	8.18203	0.943597	1.29607	1.84587	1.86327
1452	Chr10:128674708-128675708	3.54166	0.21798	0.940203	0.231843	0.81666	0.999637	1	4	2	2	12	5	1.58193	6.54563	1.88719	2.59213	5.53761	3.10545
1453	Chr10:128687093-128688093	3.8146	0.196893	0.946448	0.208034	0.835203	0.999637	3	5	1	1	10	5	4.74579	8.18203	0.943597	1.29607	4.61467	3.10545
1454	Chr10:128697520-128698520	4.35061	-0.554044	0.858567	-0.645313	0.518724	0.999637	3	2	6	1	12	9	4.74579	3.27281	5.66158	1.29607	5.53761	5.58981
1455	Chr10:128705877-128706877	5.22208	0.880239	0.79855	1.1023	0.270332	0.999637	3	3	2	5	10	14	4.74579	4.90922	1.88719	6.48033	4.61467	8.69525
1456	Chr10:128758126-128759126	5.08716	0.85918	0.825188	1.04119	0.297786	0.999637	1	5	4	2	11	15	1.58193	8.18203	3.77439	2.59213	5.07614	9.31634
1457	Chr10:128769440-128770440	5.27735	0.819916	0.803625	1.02027	0.307599	0.999637	2	5	5	2	8	15	3.16386	8.18203	4.71798	2.59213	3.69174	9.31634
1458	Chr10:128824192-128825192	5.86192	0.54567	0.817892	0.667167	0.504666	0.999637	2	6	1	4	20	11	3.16386	9.81844	0.943597	5.18426	9.22935	6.83198
1459	Chr10:128873371-128874371	4.01747	0.738995	0.909928	0.812146	0.416708	0.999637	2	3	2	1	9	14	3.16386	4.90922	1.88719	1.29607	4.15321	8.69525
1460	Chr10:128899235-128900235	4.64798	1.15864	0.84787	1.36654	0.171771	0.999637	1	4	2	4	10	13	1.58193	6.54563	1.88719	5.18426	4.61467	8.07416
1461	Chr10:128909251-128910251	8.40846	1.54529	0.743346	2.07883	0.0376334	0.999637	5	13	2	3	8	19	7.90966	21.2733	1.88719	3.8882	3.69174	11.8007
1462	Chr10:128937370-128938370	6.041	0.129578	0.77066	0.168139	0.866474	0.999637	4	6	3	2	17	11	6.32773	9.81844	2.83079	2.59213	7.84495	6.83198
1463	Chr10:128962786-128963786	5.30149	-0.157516	0.825814	-0.19074	0.848729	0.999637	1	4	8	1	16	12	1.58193	6.54563	7.54877	1.29607	7.38348	7.45307
1464	Chr10:12897329-12898329	8.83263	0.189165	0.670806	0.281996	0.777946	0.999637	8	7	3	4	21	18	12.6555	11.4548	2.83079	5.18426	9.69082	11.1796
1465	Chr10:128977096-128978096	4.00538	-0.422872	0.963409	-0.438933	0.66071	0.999637	2	1	4	0	16	13	3.16386	1.63641	3.77439	0	7.38348	8.07416
1466	Chr10:129007214-129008214	5.65445	0.697513	0.845014	0.825446	0.409119	0.999637	3	7	5	0	8	15	4.74579	11.4548	4.71798	0	3.69174	9.31634
1467	Chr10:129045035-129046035	8.24666	0.668616	0.642149	1.04121	0.297776	0.999637	3	6	7	8	16	17	4.74579	9.81844	6.60518	10.3685	7.38348	10.5585
1468	Chr10:129062615-129063615	4.54206	1.03585	0.85825	1.20693	0.227459	0.999637	0	3	5	5	8	12	0	4.90922	4.71798	6.48033	3.69174	7.45307
1469	Chr10:129083687-129084687	6.09058	0.855674	0.776336	1.1022	0.270377	0.999637	1	6	4	3	15	17	1.58193	9.81844	3.77439	3.8882	6.92201	10.5585
1470	Chr10:129096361-129097361	4.78293	0.635748	0.822411	0.773029	0.439505	0.999637	2	5	4	2	9	11	3.16386	8.18203	3.77439	2.59213	4.15321	6.83198
1471	Chr10:129107073-129108073	5.45136	0.607856	0.776142	0.783177	0.433523	0.999637	2	4	5	3	11	15	3.16386	6.54563	4.71798	3.8882	5.07614	9.31634
1472	Chr10:129119293-129120293	4.45653	0.510299	0.912308	0.55935	0.575923	0.999637	4	5	0	3	10	6	6.32773	8.18203	0	3.8882	4.61467	3.72654
1473	Chr10:12912443-12913443	40.3856	0.00123247	0.287276	0.0042902	0.996577	0.999754	29	20	37	43	87	53	45.876	32.7281	34.9131	55.7308	40.1477	32.9177
1474	Chr10:129128595-129129595	3.98165	0.168442	0.93067	0.18099	0.856375	0.999637	1	3	2	1	16	11	1.58193	4.90922	1.88719	1.29607	7.38348	6.83198
1475	Chr10:129141437-129142437	4.26091	0.0416305	0.942381	0.0441759	0.964764	0.999637	4	4	1	0	12	10	6.32773	6.54563	0.943597	0	5.53761	6.21089
1476	Chr10:129160098-129161098	3.92911	0.398376	0.904724	0.440329	0.659699	0.999637	1	4	2	2	13	8	1.58193	6.54563	1.88719	2.59213	5.99908	4.96872
1477	Chr10:129175471-129176471	5.42321	0.25459	0.776838	0.327725	0.743119	0.999637	4	4	6	4	7	9	6.32773	6.54563	5.66158	5.18426	3.23027	5.58981
1478	Chr10:129192041-129193041	5.5509	0.882887	0.84212	1.04841	0.29445	0.999637	2	9	3	1	11	10	3.16386	14.7277	2.83079	1.29607	5.07614	6.21089
1479	Chr10:129204055-129205055	5.99551	0.509118	0.755117	0.674225	0.500169	0.999637	3	4	4	3	14	17	4.74579	6.54563	3.77439	3.8882	6.46054	10.5585
1480	Chr10:129212384-129213384	4.97717	0.710222	0.860465	0.825393	0.409148	0.999637	1	8	5	2	9	6	1.58193	13.0913	4.71798	2.59213	4.15321	3.72654
1481	Chr10:129228170-129229170	2.84878	0.347264	0.99842	0.347813	0.727981	0.999637	1	3	2	1	8	6	1.58193	4.90922	1.88719	1.29607	3.69174	3.72654
1482	Chr10:129239079-129240079	5.47483	0.820935	0.823943	0.996349	0.319081	0.999637	3	5	3	1	10	18	4.74579	8.18203	2.83079	1.29607	4.61467	11.1796
1483	Chr10:129279618-129280618	5.11657	0.406769	0.830856	0.489578	0.624433	0.999637	4	2	5	2	7	17	6.32773	3.27281	4.71798	2.59213	3.23027	10.5585
1484	Chr10:129293077-129294077	3.94488	0.67379	1.00257	0.672061	0.501545	0.999637	2	2	0	1	13	16	3.16386	3.27281	0	1.29607	5.99908	9.93743
1485	Chr10:129311311-129312311	2.55097	0.22773	1.0996	0.207102	0.83593	0.999637	2	4	2	0	4	3	3.16386	6.54563	1.88719	0	1.84587	1.86327
1486	Chr10:129339282-129340282	2.86651	1.3631	1.08083	1.26116	0.207253	0.999637	2	4	0	1	4	7	3.16386	6.54563	0	1.29607	1.84587	4.34763
1487	Chr10:129348832-129349832	5.35923	0.59036	0.796205	0.741467	0.45841	0.999637	3	5	2	3	13	12	4.74579	8.18203	1.88719	3.8882	5.99908	7.45307
1488	Chr10:129382616-129383616	5.88595	0.83668	0.835844	1.001	0.316827	0.999637	2	7	1	2	17	15	3.16386	11.4548	0.943597	2.59213	7.84495	9.31634
1489	Chr10:129453858-129454858	4.33519	-1.41474	0.902825	-1.56701	0.117111	0.999637	4	1	5	1	18	6	6.32773	1.63641	4.71798	1.29607	8.30641	3.72654
1490	Chr10:129470185-129471185	8.11841	0.223054	0.70006	0.318621	0.750014	0.999637	4	10	6	2	21	13	6.32773	16.3641	5.66158	2.59213	9.69082	8.07416
1491	Chr10:129510966-129511966	7.1781	0.0814799	0.722466	0.11278	0.910205	0.999637	7	6	3	3	16	13	11.0735	9.81844	2.83079	3.8882	7.38348	8.07416
1492	Chr10:129549344-129550344	3.46915	0.456502	1.03107	0.442746	0.65795	0.999637	3	6	1	1	6	2	4.74579	9.81844	0.943597	1.29607	2.7688	1.24218
1493	Chr10:129563611-129564611	4.04322	1.22901	0.910782	1.3494	0.177209	0.999637	1	2	2	3	8	16	1.58193	3.27281	1.88719	3.8882	3.69174	9.93743
1494	Chr10:129599880-129600880	5.59851	-0.334796	0.831334	-0.402722	0.687153	0.999637	6	2	3	1	16	15	9.49159	3.27281	2.83079	1.29607	7.38348	9.31634
1495	Chr10:129617434-129618434	4.90826	1.15488	0.87038	1.32687	0.184551	0.999637	2	7	4	1	5	12	3.16386	11.4548	3.77439	1.29607	2.30734	7.45307
1496	Chr10:129647705-129648705	5.69768	-0.00325066	0.781125	-0.00416151	0.99668	0.999754	5	5	3	2	14	10	7.90966	8.18203	2.83079	2.59213	6.46054	6.21089
1497	Chr10:129716796-129717796	11.9869	0.750035	0.589227	1.27291	0.203049	0.999637	8	13	3	9	24	20	12.6555	21.2733	2.83079	11.6646	11.0752	12.4218
1498	Chr10:129759409-129760409	9.04089	-0.146684	0.653148	-0.224579	0.822306	0.999637	10	6	5	4	19	16	15.8193	9.81844	4.71798	5.18426	8.76788	9.93743
1499	Chr10:129830797-129831797	4.16761	0.536984	0.925894	0.579963	0.561939	0.999637	1	5	5	0	8	11	1.58193	8.18203	4.71798	0	3.69174	6.83198
1500	Chr10:129866168-129867168	4.38515	0.429007	0.890495	0.481762	0.629975	0.999637	2	5	1	2	14	8	3.16386	8.18203	0.943597	2.59213	6.46054	4.96872
1501	Chr10:129892450-129893450	4.29269	0.770098	0.916247	0.840492	0.400632	0.999637	0	2	5	2	10	17	0	3.27281	4.71798	2.59213	4.61467	10.5585
1502	Chr10:129933935-129934935	6.33899	0.563845	0.789119	0.714524	0.474903	0.999637	4	9	4	1	11	11	6.32773	14.7277	3.77439	1.29607	5.07614	6.83198
1503	Chr10:13193702-13194702	47.1101	0.0859728	0.263875	0.325809	0.744569	0.999637	36	32	38	38	97	70	56.9495	52.365	35.8567	49.2505	44.7623	43.4763
1504	Chr10:13218847-13219847	9.54224	0.086313	0.653182	0.132142	0.894872	0.999637	6	7	4	4	31	21	9.49159	11.4548	3.77439	5.18426	14.3055	13.0429
1505	Chr10:13272201-13273201	38.2192	0.0974786	0.291362	0.334561	0.737956	0.999637	25	20	38	42	76	51	39.5483	32.7281	35.8567	54.4348	35.0715	31.6756
1506	Chr10:13272448-13273448	45.6059	-0.0238258	0.280718	-0.0848745	0.932361	0.999637	34	26	42	47	95	53	53.7857	42.5466	39.6311	60.9151	43.8394	32.9177
1507	Chr10:13588286-13589286	27.2868	-0.148542	0.334298	-0.44434	0.656797	0.999637	14	14	28	21	79	46	22.147	22.9097	26.4207	27.2174	36.4559	28.5701
1508	Chr10:13685686-13686686	42.2744	-0.324339	0.313505	-1.03456	0.300875	0.999637	39	12	48	44	79	54	61.6953	19.6369	45.2926	57.0269	36.4559	33.5388
1509	Chr10:14242385-14243385	4.5496	0.187398	0.858537	0.218276	0.827214	0.999637	3	2	7	5	4	7	4.74579	3.27281	6.60518	6.48033	1.84587	4.34763
1510	Chr10:14264342-14265342	30.5218	-0.0563283	0.308629	-0.182511	0.855181	0.999637	19	18	34	27	66	42	30.0567	29.4553	32.0823	34.9938	30.4569	26.0858
1511	Chr10:14424866-14425866	44.7604	0.0725713	0.263685	0.27522	0.783147	0.999637	27	25	51	42	87	68	42.7122	40.9102	48.1234	54.4348	40.1477	42.2341
1512	Chr10:14437520-14438520	4.0369	1.27698	0.949073	1.34551	0.178461	0.999637	0	2	2	3	10	17	0	3.27281	1.88719	3.8882	4.61467	10.5585
1513	Chr10:14479528-14480528	32.3743	-0.143491	0.306031	-0.468878	0.639157	0.999637	23	12	34	28	76	56	36.3844	19.6369	32.0823	36.2898	35.0715	34.781
1514	Chr10:17442535-17443535	60.8058	0.23634	0.241096	0.980274	0.326951	0.999637	31	40	66	59	118	92	49.0399	65.4563	62.2774	76.4679	54.4532	57.1402
1515	Chr10:17515533-17516533	17.6929	-0.151908	0.448223	-0.338911	0.734677	0.999637	8	13	26	15	37	18	12.6555	21.2733	24.5335	19.441	17.0743	11.1796
1516	Chr10:17667373-17668373	28.0837	-0.223081	0.338703	-0.658635	0.51013	0.999637	20	21	35	20	54	30	31.6386	34.3645	33.0259	25.9213	24.9192	18.6327
1517	Chr10:17742558-17743558	24.9653	-0.141594	0.343531	-0.412171	0.680214	0.999637	16	15	26	21	60	33	25.3109	24.5461	24.5335	27.2174	27.688	20.496
1518	Chr10:17775168-17776168	45.2408	-0.127822	0.26335	-0.485369	0.627414	0.999637	25	31	55	33	104	62	39.5483	50.7286	51.8978	42.7702	47.9926	38.5075
1519	Chr10:17894641-17895641	7.39017	0.516934	0.678989	0.761329	0.44646	0.999637	3	5	5	7	18	15	4.74579	8.18203	4.71798	9.07246	8.30641	9.31634
1520	Chr10:17954304-17955304	45.1576	0.0989524	0.261908	0.377814	0.705569	0.999637	25	23	51	42	94	77	39.5483	37.6374	48.1234	54.4348	43.3779	47.8239
1521	Chr10:18109629-18110629	15.5705	-0.212896	0.470893	-0.452111	0.651189	0.999637	7	9	17	13	47	21	11.0735	14.7277	16.0411	16.8489	21.689	13.0429
1522	Chr10:18265382-18266382	32.2186	0.262112	0.304271	0.86144	0.388996	0.999637	17	18	27	32	75	57	26.8928	29.4553	25.4771	41.4741	34.6101	35.4021
1523	Chr10:18463064-18464064	32.6922	0.0395473	0.318181	0.124292	0.901084	0.999637	25	12	34	35	59	52	39.5483	19.6369	32.0823	45.3623	27.2266	32.2967
1524	Chr10:18504317-18505317	9.72831	0.840414	0.638306	1.31663	0.187962	0.999637	5	12	4	5	19	19	7.90966	19.6369	3.77439	6.48033	8.76788	11.8007
1525	Chr10:18564378-18565378	40.1571	-0.310729	0.28741	-1.08113	0.279638	0.999637	23	16	60	28	91	70	36.3844	26.1825	56.6158	36.2898	41.9935	43.4763
1526	Chr10:18734963-18735963	19.8919	-0.110687	0.394431	-0.280624	0.778999	0.999637	12	13	26	13	40	31	18.9832	21.2733	24.5335	16.8489	18.4587	19.2538
1527	Chr10:19075867-19076867	22.1098	-0.0522549	0.37977	-0.137596	0.89056	0.999637	18	11	21	22	43	29	28.4748	18.0005	19.8155	28.5135	19.8431	18.0116
1528	Chr10:19311256-19312256	35.7629	-0.176699	0.288081	-0.613366	0.539634	0.999637	24	16	38	27	89	62	37.9664	26.1825	35.8567	34.9938	41.0706	38.5075
1529	Chr10:19341305-19342305	10.1078	0.389007	0.64879	0.599588	0.548781	0.999637	3	9	5	5	34	23	4.74579	14.7277	4.71798	6.48033	15.6899	14.2851
1530	Chr10:19364057-19365057	13.8561	1.14816	0.549031	2.09124	0.0365065	0.999637	2	19	12	10	21	24	3.16386	31.0917	11.3232	12.9607	9.69082	14.9061
1531	Chr10:19431894-19432894	25.4834	0.0186345	0.340519	0.054724	0.956358	0.999637	16	13	24	19	62	49	25.3109	21.2733	22.6463	24.6253	28.611	30.4334
1532	Chr10:19570765-19571765	39.4556	-0.0912802	0.276273	-0.330399	0.741099	0.999637	27	19	45	35	82	60	42.7122	31.0917	42.4618	45.3623	37.8403	37.2654
1533	Chr10:19626995-19627995	28.0087	0.304443	0.323582	0.940855	0.346779	0.999637	16	21	30	23	47	46	25.3109	34.3645	28.3079	29.8095	21.689	28.5701
1534	Chr10:19653779-19654779	40.1042	0.0791528	0.314835	0.25141	0.801497	0.999637	13	15	50	41	104	76	20.5651	24.5461	47.1798	53.1387	47.9926	47.2028
1535	Chr10:19867778-19868778	31.8376	-0.191214	0.313262	-0.610397	0.541599	0.999637	25	11	31	27	76	55	39.5483	18.0005	29.2515	34.9938	35.0715	34.1599
1536	Chr10:20031600-20032600	50.4705	-0.234467	0.270856	-0.865651	0.386682	0.999637	31	30	74	41	95	61	49.0399	49.0922	69.8261	53.1387	43.8394	37.8865
1537	Chr10:20031776-20032776	46.2179	-0.129488	0.285533	-0.453495	0.650192	0.999637	26	31	67	39	84	53	41.1302	50.7286	63.221	50.5466	38.7633	32.9177
1538	Chr10:20067126-20068126	36.8577	-0.374196	0.300593	-1.24486	0.213184	0.999637	23	18	47	35	91	38	36.3844	29.4553	44.349	45.3623	41.9935	23.6014
1539	Chr10:20444384-20445384	12.4767	0.722372	0.572631	1.2615	0.20713	0.999637	4	12	5	10	34	25	6.32773	19.6369	4.71798	12.9607	15.6899	15.5272
1540	Chr10:20671892-20672892	43.3901	-0.0286992	0.274117	-0.104697	0.916616	0.999637	26	21	55	42	84	64	41.1302	34.3645	51.8978	54.4348	38.7633	39.7497
1541	Chr10:20880290-20881290	49.2285	-0.193823	0.265219	-0.730805	0.464898	0.999637	32	18	58	47	115	75	50.6218	29.4553	54.7286	60.9151	53.0688	46.5817
1542	Chr10:21015286-21016286	32.2695	-0.153009	0.3122	-0.490099	0.624064	0.999637	23	13	42	29	60	50	36.3844	21.2733	39.6311	37.5859	27.688	31.0545
1543	Chr10:21096598-21097598	8.19518	0.839041	0.718925	1.16708	0.243179	0.999637	6	7	2	3	15	25	9.49159	11.4548	1.88719	3.8882	6.92201	15.5272
1544	Chr10:21144611-21145611	7.44687	-0.340525	0.695316	-0.489742	0.624317	0.999637	4	4	7	3	26	15	6.32773	6.54563	6.60518	3.8882	11.9982	9.31634
1545	Chr10:21312465-21313465	11.0579	0.110626	0.565993	0.195454	0.845037	0.999637	5	5	15	9	22	23	7.90966	8.18203	14.1539	11.6646	10.1523	14.2851
1546	Chr10:21410152-21411152	8.47074	0.259737	0.664953	0.390609	0.696086	0.999637	4	4	8	4	21	25	6.32773	6.54563	7.54877	5.18426	9.69082	15.5272
1547	Chr10:21601491-21602491	25.8826	0.11503	0.3602	0.319349	0.749462	0.999637	9	11	30	29	66	43	14.2374	18.0005	28.3079	37.5859	30.4569	26.7068
1548	Chr10:21868129-21869129	22.1799	-0.270809	0.408938	-0.662225	0.507827	0.999637	13	8	39	21	35	31	20.5651	13.0913	36.8003	27.2174	16.1514	19.2538
1549	Chr10:21877893-21878893	24.0863	-0.108318	0.671981	-0.161192	0.871942	0.999637	10	7	44	31	38	29	15.8193	11.4548	41.5183	40.178	17.5358	18.0116
1550	Chr10:21892828-21893828	6.32346	-0.536464	0.728001	-0.7369	0.461183	0.999637	4	3	9	5	16	7	6.32773	4.90922	8.49237	6.48033	7.38348	4.34763
1551	Chr10:22081201-22082201	10.6961	0.240498	0.595676	0.40374	0.686404	0.999637	6	5	11	15	20	12	9.49159	8.18203	10.3796	19.441	9.22935	7.45307
1552	Chr10:22364318-22365318	29.1641	-0.114621	0.31886	-0.359471	0.719243	0.999637	23	19	31	19	57	44	36.3844	31.0917	29.2515	24.6253	26.3036	27.3279
1553	Chr10:22451244-22452244	35.1666	-0.119928	0.295948	-0.405235	0.685305	0.999637	17	18	49	30	78	54	26.8928	29.4553	46.2362	38.882	35.9945	33.5388
1554	Chr10:22539434-22540434	13.1166	0.207181	0.532423	0.389128	0.697181	0.999637	7	8	10	7	35	32	11.0735	13.0913	9.43597	9.07246	16.1514	19.8749
1555	Chr10:23069201-23070201	38.5676	0.198439	0.283429	0.700139	0.483841	0.999637	27	26	35	36	70	55	42.7122	42.5466	33.0259	46.6584	32.3027	34.1599
1556	Chr10:23506515-23507515	52.3111	-0.0766942	0.263772	-0.29076	0.771235	0.999637	32	32	65	49	103	62	50.6218	52.365	61.3338	63.5072	47.5311	38.5075
1557	Chr10:23516293-23517293	44.774	0.000793599	0.278375	0.00285083	0.997725	0.999754	34	27	46	43	81	55	53.7857	44.183	43.4054	55.7308	37.3789	34.1599
1558	Chr10:23570769-23571769	7.21549	0.393219	0.698516	0.562935	0.573479	0.999637	5	5	3	7	17	12	7.90966	8.18203	2.83079	9.07246	7.84495	7.45307
1559	Chr10:23613995-23614995	13.9049	0.780035	0.531002	1.46899	0.141836	0.999637	8	17	7	8	24	24	12.6555	27.8189	6.60518	10.3685	11.0752	14.9061
1560	Chr10:23639663-23640663	9.83533	0.702447	0.680042	1.03295	0.301629	0.999637	3	13	6	2	24	22	4.74579	21.2733	5.66158	2.59213	11.0752	13.664
1561	Chr10:23657879-23658879	10.861	0.682606	0.58613	1.1646	0.244182	0.999637	6	10	5	7	23	24	9.49159	16.3641	4.71798	9.07246	10.6138	14.9061
1562	Chr10:23668823-23669823	6.96665	1.04612	0.765184	1.36714	0.17158	0.999637	1	8	2	6	19	14	1.58193	13.0913	1.88719	7.7764	8.76788	8.69525
1563	Chr10:23679801-23680801	10.023	0.489492	0.613992	0.797229	0.425318	0.999637	4	11	10	4	19	20	6.32773	18.0005	9.43597	5.18426	8.76788	12.4218
1564	Chr10:23689968-23690968	11.3097	0.617205	0.639717	0.964809	0.33464	0.999637	8	10	2	5	27	29	12.6555	16.3641	1.88719	6.48033	12.4596	18.0116
1565	Chr10:23704952-23705952	8.50935	0.689437	0.660923	1.04314	0.296883	0.999637	5	10	6	4	13	16	7.90966	16.3641	5.66158	5.18426	5.99908	9.93743
1566	Chr10:23712998-23713998	8.33527	0.267482	0.660034	0.405254	0.685291	0.999637	7	6	4	5	18	17	11.0735	9.81844	3.77439	6.48033	8.30641	10.5585
1567	Chr10:23719246-23720246	7.94485	0.60573	0.712341	0.850337	0.395138	0.999637	2	5	3	7	26	20	3.16386	8.18203	2.83079	9.07246	11.9982	12.4218
1568	Chr10:23746529-23747529	6.71776	0.205966	0.73035	0.28201	0.777936	0.999637	3	4	5	3	20	18	4.74579	6.54563	4.71798	3.8882	9.22935	11.1796
1569	Chr10:23756855-23757855	5.04638	0.619889	0.805244	0.769815	0.44141	0.999637	1	5	5	3	11	11	1.58193	8.18203	4.71798	3.8882	5.07614	6.83198
1570	Chr10:23768817-23769817	5.643	-0.0898533	0.810018	-0.110928	0.911674	0.999637	4	1	6	2	14	18	6.32773	1.63641	5.66158	2.59213	6.46054	11.1796
1571	Chr10:23795768-23796768	2.69418	0.591832	1.0604	0.558122	0.576761	0.999637	0	3	1	2	10	5	0	4.90922	0.943597	2.59213	4.61467	3.10545
1572	Chr10:23811626-23812626	4.71214	-0.0180611	0.816566	-0.0221184	0.982354	0.999637	3	3	6	2	9	10	4.74579	4.90922	5.66158	2.59213	4.15321	6.21089
1573	Chr10:23821257-23822257	2.47762	1.22531	1.15334	1.0624	0.288055	0.999637	0	3	0	1	8	8	0	4.90922	0	1.29607	3.69174	4.96872
1574	Chr10:23828888-23829888	8.73288	0.454933	0.647921	0.702142	0.48259	0.999637	4	9	5	6	22	14	6.32773	14.7277	4.71798	7.7764	10.1523	8.69525
1575	Chr10:23868624-23869624	32.9586	-0.0795913	0.304726	-0.26119	0.793946	0.999637	16	19	46	28	69	48	25.3109	31.0917	43.4054	36.2898	31.8413	29.8123
1576	Chr10:23942824-23943824	26.7896	0.0522718	0.348672	0.149917	0.88083	0.999637	9	13	32	26	71	46	14.2374	21.2733	30.1951	33.6977	32.7642	28.5701
1577	Chr10:24314749-24315749	38.8554	-0.187565	0.280556	-0.668547	0.503784	0.999637	22	28	46	24	95	55	34.8025	45.8194	43.4054	31.1056	43.8394	34.1599
1578	Chr10:24431465-24432465	38.7711	-0.133689	0.28529	-0.468606	0.639351	0.999637	21	16	51	35	88	63	33.2206	26.1825	48.1234	45.3623	40.6091	39.1286
1579	Chr10:24555501-24556501	21.0538	0.0415575	0.430084	0.0966266	0.923023	0.999637	6	7	23	25	64	35	9.49159	11.4548	21.7027	32.4016	29.5339	21.7381
1580	Chr10:24589293-24590293	38.8485	-0.0666092	0.304391	-0.218828	0.826784	0.999637	26	22	52	38	63	46	41.1302	36.0009	49.067	49.2505	29.0724	28.5701
1581	Chr10:24646776-24647776	9.6994	0.429829	0.657452	0.65378	0.513253	0.999637	3	10	10	2	22	24	4.74579	16.3641	9.43597	2.59213	10.1523	14.9061
1582	Chr10:25027176-25028176	6.97699	-0.0464143	0.723123	-0.0641859	0.948822	0.999637	3	4	9	2	18	18	4.74579	6.54563	8.49237	2.59213	8.30641	11.1796
1583	Chr10:25079105-25080105	33.5166	-0.381632	0.319978	-1.19268	0.232994	0.999637	29	10	40	21	74	64	45.876	16.3641	37.7439	27.2174	34.1486	39.7497
1584	Chr10:25713675-25714675	12.518	0.0518842	0.552066	0.0939817	0.925124	0.999637	7	9	13	4	30	29	11.0735	14.7277	12.2668	5.18426	13.844	18.0116
1585	Chr10:25797562-25798562	30.1334	-0.0330332	0.309639	-0.106683	0.91504	0.999637	19	16	29	26	73	48	30.0567	26.1825	27.3643	33.6977	33.6871	29.8123
1586	Chr10:25797956-25798956	31.9196	-0.294999	0.310326	-0.950609	0.341803	0.999637	22	16	31	28	87	40	34.8025	26.1825	29.2515	36.2898	40.1477	24.8436
1587	Chr10:25949014-25950014	5.33951	0.524114	0.777794	0.673847	0.500409	0.999637	3	5	4	3	10	11	4.74579	8.18203	3.77439	3.8882	4.61467	6.83198
1588	Chr10:26094491-26095491	29.6397	0.213818	0.31173	0.685908	0.492771	0.999637	16	19	28	28	64	47	25.3109	31.0917	26.4207	36.2898	29.5339	29.1912
1589	Chr10:26472728-26473728	7.90388	0.533096	0.695988	0.765955	0.443703	0.999637	4	9	4	3	19	16	6.32773	14.7277	3.77439	3.8882	8.76788	9.93743
1590	Chr10:27336248-27337248	17.4675	-0.133812	0.443852	-0.301478	0.76305	0.999637	8	6	22	14	47	35	12.6555	9.81844	20.7591	18.1449	21.689	21.7381
1591	Chr10:27794127-27795127	59.46	-0.1765	0.25395	-0.695016	0.487045	0.999637	41	42	76	42	112	73	64.8592	68.7291	71.7133	54.4348	51.6844	45.3395
1592	Chr10:28387667-28388667	11.3922	-0.113579	0.559869	-0.202867	0.839239	0.999637	8	8	15	8	19	15	12.6555	13.0913	14.1539	10.3685	8.76788	9.31634
1593	Chr10:28705609-28706609	8.23747	1.57784	0.762871	2.0683	0.0386121	0.999637	1	12	1	6	18	18	1.58193	19.6369	0.943597	7.7764	8.30641	11.1796
1594	Chr10:28863303-28864303	31.5033	-0.119747	0.332539	-0.360101	0.718772	0.999637	12	12	39	32	89	50	18.9832	19.6369	36.8003	41.4741	41.0706	31.0545
1595	Chr10:28863500-28864500	27.6925	-0.0820134	0.354092	-0.231616	0.816836	0.999637	11	9	36	30	72	45	17.4012	14.7277	33.9695	38.882	33.2257	27.949
1596	Chr10:28930950-28931950	6.88649	0.231895	0.780732	0.297023	0.766449	0.999637	4	8	6	0	15	15	6.32773	13.0913	5.66158	0	6.92201	9.31634
1597	Chr10:29032473-29033473	34.4441	0.0886302	0.298305	0.297112	0.766381	0.999637	21	16	40	35	65	55	33.2206	26.1825	37.7439	45.3623	29.9954	34.1599
1598	Chr10:29081748-29082748	45.6021	0.139586	0.269924	0.517132	0.605064	0.999637	33	26	50	35	74	84	52.2037	42.5466	47.1798	45.3623	34.1486	52.1715
1599	Chr10:29255173-29256173	23.4166	-0.0689858	0.367373	-0.187781	0.851048	0.999637	12	9	28	18	59	48	18.9832	14.7277	26.4207	23.3292	27.2266	29.8123
1600	Chr10:29919846-29920846	36.724	-0.131479	0.304035	-0.432448	0.665416	0.999637	21	18	54	35	67	49	33.2206	29.4553	50.9542	45.3623	30.9183	30.4334
1601	Chr10:30320055-30321055	53.4885	-0.0642422	0.275537	-0.233153	0.815643	0.999637	36	32	61	55	104	56	56.9495	52.365	57.5594	71.2836	47.9926	34.781
1602	Chr10:30337785-30338785	52.6656	-0.135313	0.266108	-0.508489	0.61111	0.999637	29	37	74	40	103	65	45.876	60.547	69.8261	51.8426	47.5311	40.3708
1603	Chr10:30450479-30451479	9.4929	-0.00538143	0.615326	-0.00874566	0.993022	0.999754	3	6	15	7	20	16	4.74579	9.81844	14.1539	9.07246	9.22935	9.93743
1604	Chr10:30522413-30523413	49.9017	-0.125125	0.265701	-0.470923	0.637695	0.999637	23	30	69	31	117	88	36.3844	49.0922	65.1082	40.178	53.9917	54.6559
1605	Chr10:30562107-30563107	36.8739	-0.250742	0.300623	-0.834075	0.404239	0.999637	18	13	49	33	98	60	28.4748	21.2733	46.2362	42.7702	45.2238	37.2654
1606	Chr10:31032689-31033689	34.1824	0.0140535	0.30333	0.0463307	0.963047	0.999637	21	20	38	35	69	42	33.2206	32.7281	35.8567	45.3623	31.8413	26.0858
1607	Chr10:31165227-31166227	34.3238	-0.20295	0.295392	-0.687054	0.492048	0.999637	23	19	45	21	71	58	36.3844	31.0917	42.4618	27.2174	32.7642	36.0232
1608	Chr10:31328490-31329490	37.4464	-0.132376	0.280737	-0.471531	0.637262	0.999637	25	20	38	32	90	54	39.5483	32.7281	35.8567	41.4741	41.5321	33.5388
1609	Chr10:3133805-3134805	46.1849	0.095379	0.263685	0.361715	0.717565	0.999637	28	30	47	44	95	62	44.2941	49.0922	44.349	57.0269	43.8394	38.5075
1610	Chr10:31670794-31671794	4.62297	0.986266	0.889252	1.1091	0.267389	0.999637	2	7	1	2	10	8	3.16386	11.4548	0.943597	2.59213	4.61467	4.96872
1611	Chr10:32121679-32122679	3.25652	0.814128	1.00545	0.809714	0.418104	0.999637	0	3	2	1	10	11	0	4.90922	1.88719	1.29607	4.61467	6.83198
1612	Chr10:32609768-32610768	34.2225	0.0555333	0.295512	0.187923	0.850937	0.999637	16	23	43	28	72	52	25.3109	37.6374	40.5747	36.2898	33.2257	32.2967
1613	Chr10:32802790-32803790	8.51599	0.133175	0.646977	0.205842	0.836914	0.999637	6	3	9	6	16	21	9.49159	4.90922	8.49237	7.7764	7.38348	13.0429
1614	Chr10:3293564-3294564	9.75941	-0.0975623	0.604785	-0.161317	0.871844	0.999637	8	5	7	6	25	19	12.6555	8.18203	6.60518	7.7764	11.5367	11.8007
1615	Chr10:33344075-33345075	33.1837	-0.263811	0.302133	-0.87316	0.382576	0.999637	25	13	41	27	70	52	39.5483	21.2733	38.6875	34.9938	32.3027	32.2967
1616	Chr10:33501421-33502421	3.90396	0.861458	0.904406	0.952512	0.340837	0.999637	2	5	3	2	5	7	3.16386	8.18203	2.83079	2.59213	2.30734	4.34763
1617	Chr10:33528804-33529804	2.73753	0.649337	1.10427	0.588024	0.556516	0.999637	0	2	0	3	12	6	0	3.27281	0	3.8882	5.53761	3.72654
1618	Chr10:33583242-33584242	4.44858	0.399661	0.867866	0.46051	0.64515	0.999637	1	4	6	1	9	12	1.58193	6.54563	5.66158	1.29607	4.15321	7.45307
1619	Chr10:33624418-33625418	24.3253	-0.290175	0.367715	-0.78913	0.430036	0.999637	10	9	36	21	65	39	15.8193	14.7277	33.9695	27.2174	29.9954	24.2225
1620	Chr10:33670565-33671565	35.0377	-0.0895294	0.292365	-0.306225	0.759433	0.999637	20	20	47	28	70	53	31.6386	32.7281	44.349	36.2898	32.3027	32.9177
1621	Chr10:33714360-33715360	9.99466	0.652307	0.609072	1.07098	0.284176	0.999637	6	10	6	5	18	22	9.49159	16.3641	5.66158	6.48033	8.30641	13.664
1622	Chr10:33730303-33731303	5.91567	0.727165	0.783913	0.927609	0.35361	0.999637	2	8	6	2	9	11	3.16386	13.0913	5.66158	2.59213	4.15321	6.83198
1623	Chr10:33738930-33739930	52.3112	0.113927	0.261428	0.435786	0.662992	0.999637	38	24	46	54	106	84	60.1134	39.2738	43.4054	69.9876	48.9155	52.1715
1624	Chr10:33756904-33757904	4.79346	0.864208	0.884277	0.977304	0.328419	0.999637	0	5	3	2	14	14	0	8.18203	2.83079	2.59213	6.46054	8.69525
1625	Chr10:33763619-33764619	11.4356	0.459405	0.581566	0.789945	0.42956	0.999637	5	11	6	7	31	22	7.90966	18.0005	5.66158	9.07246	14.3055	13.664
1626	Chr10:33815825-33816825	26.3308	-0.113906	0.351487	-0.324068	0.745886	0.999637	25	15	24	15	49	47	39.5483	24.5461	22.6463	19.441	22.6119	29.1912
1627	Chr10:33847278-33848278	25.9258	0.514139	0.33728	1.52437	0.127418	0.999637	10	18	26	22	50	55	15.8193	29.4553	24.5335	28.5135	23.0734	34.1599
1628	Chr10:33926857-33927857	49.1749	0.0101693	0.270625	0.0375773	0.970025	0.999637	23	28	71	43	93	76	36.3844	45.8194	66.9954	55.7308	42.9165	47.2028
1629	Chr10:34001497-34002497	47.2487	-0.151167	0.280726	-0.538485	0.590242	0.999637	37	24	50	48	94	53	58.5315	39.2738	47.1798	62.2112	43.3779	32.9177
1630	Chr10:34016728-34017728	40.734	-0.348116	0.284816	-1.22225	0.221615	0.999637	22	21	53	36	107	47	34.8025	34.3645	50.0106	46.6584	49.377	29.1912
1631	Chr10:34109288-34110288	7.40297	0.387711	0.710462	0.545717	0.58526	0.999637	2	7	6	3	21	17	3.16386	11.4548	5.66158	3.8882	9.69082	10.5585
1632	Chr10:34137858-34138858	38.4868	-0.132181	0.297511	-0.444291	0.656832	0.999637	28	22	49	35	66	46	44.2941	36.0009	46.2362	45.3623	30.4569	28.5701
1633	Chr10:34202707-34203707	11.5806	-0.557151	0.648768	-0.858783	0.39046	0.999637	11	4	11	1	33	30	17.4012	6.54563	10.3796	1.29607	15.2284	18.6327
1634	Chr10:35431197-35432197	4.00949	1.00394	0.912007	1.1008	0.270983	0.999637	0	4	4	2	8	12	0	6.54563	3.77439	2.59213	3.69174	7.45307
1635	Chr10:3584281-3585281	7.75764	1.07337	0.687499	1.56127	0.118461	0.999637	3	8	3	6	15	18	4.74579	13.0913	2.83079	7.7764	6.92201	11.1796
1636	Chr10:3587535-3588535	10.0225	0.64552	0.615231	1.04923	0.294071	0.999637	4	7	8	5	21	30	6.32773	11.4548	7.54877	6.48033	9.69082	18.6327
1637	Chr10:36226121-36227121	43.1804	0.079977	0.267635	0.298829	0.765071	0.999637	20	25	51	35	98	77	31.6386	40.9102	48.1234	45.3623	45.2238	47.8239
1638	Chr10:36693851-36694851	48.8058	0.0264484	0.268187	0.0986192	0.921441	0.999637	27	23	62	50	95	73	42.7122	37.6374	58.503	64.8033	43.8394	45.3395
1639	Chr10:36858232-36859232	40.3804	-0.16718	0.328845	-0.508384	0.611184	0.999637	38	15	43	45	64	47	60.1134	24.5461	40.5747	58.323	29.5339	29.1912
1640	Chr10:36858865-36859865	27.5272	0.157412	0.338439	0.465112	0.641851	0.999637	15	15	32	31	51	37	23.729	24.5461	30.1951	40.178	23.5348	22.9803
1641	Chr10:38684822-38685822	25.3384	0.447454	0.338891	1.32035	0.186718	0.999637	14	15	22	26	47	47	22.147	24.5461	20.7591	33.6977	21.689	29.1912
1642	Chr10:38853220-38854220	42.8478	-0.144955	0.276516	-0.524219	0.600126	0.999637	30	18	54	39	83	65	47.4579	29.4553	50.9542	50.5466	38.3018	40.3708
1643	Chr10:38853330-38854330	44.4434	-0.116026	0.272748	-0.425395	0.670549	0.999637	31	19	54	42	87	66	49.0399	31.0917	50.9542	54.4348	40.1477	40.9919
1644	Chr10:38883100-38884100	12.0912	0.465225	0.608233	0.76488	0.444343	0.999637	6	12	9	2	27	32	9.49159	19.6369	8.49237	2.59213	12.4596	19.8749
1645	Chr10:39088162-39089162	11.0882	0.380608	0.578456	0.657972	0.510556	0.999637	8	11	7	6	21	19	12.6555	18.0005	6.60518	7.7764	9.69082	11.8007
1646	Chr10:39332241-39333241	27.3683	0.194891	0.328904	0.592548	0.553484	0.999637	19	19	27	23	47	42	30.0567	31.0917	25.4771	29.8095	21.689	26.0858
1647	Chr10:39451425-39452425	50.9653	-0.145207	0.249835	-0.58121	0.561099	0.999637	32	32	61	39	111	70	50.6218	52.365	57.5594	50.5466	51.2229	43.4763
1648	Chr10:39646229-39647229	25.1548	-0.0109267	0.34014	-0.0321242	0.974373	0.999637	16	17	25	16	58	43	25.3109	27.8189	23.5899	20.7371	26.7651	26.7068
1649	Chr10:39679459-39680459	30.8676	-0.169385	0.310921	-0.544784	0.585902	0.999637	22	12	33	25	73	54	34.8025	19.6369	31.1387	32.4016	33.6871	33.5388
1650	Chr10:39705952-39706952	10.2136	0.308619	0.627814	0.491577	0.623019	0.999637	6	6	5	5	29	28	9.49159	9.81844	4.71798	6.48033	13.3826	17.3905
1651	Chr10:39731173-39732173	6.77464	0.610548	0.712977	0.856336	0.391812	0.999637	2	5	5	8	16	11	3.16386	8.18203	4.71798	10.3685	7.38348	6.83198
1652	Chr10:39744574-39745574	26.4555	-0.301744	0.340972	-0.884951	0.376183	0.999637	15	11	30	24	75	37	23.729	18.0005	28.3079	31.1056	34.6101	22.9803
1653	Chr10:39861562-39862562	29.1172	-0.314932	0.322955	-0.975156	0.329483	0.999637	22	17	36	14	64	49	34.8025	27.8189	33.9695	18.1449	29.5339	30.4334
1654	Chr10:39966285-39967285	53.202	-0.387439	0.265569	-1.4589	0.144593	0.999637	34	28	83	40	105	66	53.7857	45.8194	78.3185	51.8426	48.4541	40.9919
1655	Chr10:39976971-39977971	50.4749	-0.528795	0.273762	-1.93159	0.0534103	0.999637	40	26	75	37	97	54	63.2773	42.5466	70.7697	47.9544	44.7623	33.5388
1656	Chr10:40021492-40022492	30.3575	-0.727616	0.32287	-2.25359	0.0242221	0.999637	24	14	44	22	72	29	37.9664	22.9097	41.5183	28.5135	33.2257	18.0116
1657	Chr10:40068615-40069615	48.7713	-0.274252	0.262915	-1.04312	0.296892	0.999637	38	31	61	28	95	71	60.1134	50.7286	57.5594	36.2898	43.8394	44.0974
1658	Chr10:40289643-40290643	9.87471	0.547386	0.669872	0.81715	0.413843	0.999637	7	10	2	4	24	22	11.0735	16.3641	1.88719	5.18426	11.0752	13.664
1659	Chr10:40349318-40350318	10.6992	-0.140754	0.585571	-0.24037	0.810043	0.999637	7	7	10	4	29	22	11.0735	11.4548	9.43597	5.18426	13.3826	13.664
1660	Chr10:40402589-40403589	36.717	-0.246157	0.291938	-0.84318	0.399128	0.999637	26	25	40	28	84	41	41.1302	40.9102	37.7439	36.2898	38.7633	25.4647
1661	Chr10:40602449-40603449	50.7295	-0.0337355	0.26624	-0.126711	0.899169	0.999637	40	32	56	42	85	68	63.2773	52.365	52.8414	54.4348	39.2247	42.2341
1662	Chr10:40602782-40603782	37.6815	-0.314904	0.284732	-1.10597	0.26874	0.999637	26	21	52	26	77	52	41.1302	34.3645	49.067	33.6977	35.533	32.2967
1663	Chr10:40791591-40792591	18.0162	0.0700865	0.480581	0.145837	0.88405	0.999637	4	17	20	15	53	18	6.32773	27.8189	18.8719	19.441	24.4578	11.1796
1664	Chr10:41022547-41023547	63.3185	-0.36636	0.254921	-1.43715	0.150674	0.999637	48	31	84	55	127	71	75.9327	50.7286	79.2621	71.2836	58.6064	44.0974
1665	Chr10:41035554-41036554	6.76726	0.581464	0.727407	0.799365	0.424079	0.999637	3	8	4	5	15	9	4.74579	13.0913	3.77439	6.48033	6.92201	5.58981
1666	Chr10:41169690-41170690	60.0787	-0.133816	0.283772	-0.471561	0.63724	0.999637	39	29	85	63	101	69	61.6953	47.4558	80.2057	81.6522	46.6082	42.8552
1667	Chr10:41195621-41196621	56.0549	-0.144736	0.254735	-0.568185	0.569909	0.999637	46	33	57	47	110	71	72.7689	54.0014	53.785	60.9151	50.7614	44.0974
1668	Chr10:41209675-41210675	50.7528	-0.226102	0.259848	-0.870131	0.384229	0.999637	34	24	70	41	99	75	53.7857	39.2738	66.0518	53.1387	45.6853	46.5817
1669	Chr10:41209746-41210746	50.1306	-0.189078	0.261419	-0.723275	0.469511	0.999637	34	24	68	41	95	75	53.7857	39.2738	64.1646	53.1387	43.8394	46.5817
1670	Chr10:41238807-41239807	56.7869	-0.144802	0.246502	-0.587428	0.556916	0.999637	38	37	68	44	116	73	60.1134	60.547	64.1646	57.0269	53.5302	45.3395
1671	Chr10:41428606-41429606	11.8583	1.33901	0.595156	2.24984	0.0244591	0.999637	4	17	5	7	18	24	6.32773	27.8189	4.71798	9.07246	8.30641	14.9061
1672	Chr10:41529176-41530176	41.3895	-0.367184	0.275391	-1.33332	0.182427	0.999637	33	19	51	33	88	54	52.2037	31.0917	48.1234	42.7702	40.6091	33.5388
1673	Chr10:41529881-41530881	42.9789	-0.268731	0.275527	-0.975336	0.329394	0.999637	28	24	56	37	92	50	44.2941	39.2738	52.8414	47.9544	42.455	31.0545
1674	Chr10:41737748-41738748	34.3242	-0.00788616	0.306469	-0.0257323	0.979471	0.999637	13	18	48	28	79	61	20.5651	29.4553	45.2926	36.2898	36.4559	37.8865
1675	Chr10:41996061-41997061	57.8824	-0.178384	0.263928	-0.67588	0.499117	0.999637	45	33	75	47	95	75	71.1869	54.0014	70.7697	60.9151	43.8394	46.5817
1676	Chr10:42197871-42198871	38.114	-0.189671	0.282949	-0.670336	0.502644	0.999637	29	21	44	31	76	51	45.876	34.3645	41.5183	40.178	35.0715	31.6756
1677	Chr10:42221337-42222337	46.1241	-0.216793	0.279334	-0.776105	0.437687	0.999637	30	30	54	41	103	46	47.4579	49.0922	50.9542	53.1387	47.5311	28.5701
1678	Chr10:42302938-42303938	26.7239	-0.0252382	0.331576	-0.0761158	0.939327	0.999637	19	13	29	24	53	42	30.0567	21.2733	27.3643	31.1056	24.4578	26.0858
1679	Chr10:42303129-42304129	24.582	-0.00228362	0.344464	-0.00662948	0.99471	0.999754	17	13	25	18	53	45	26.8928	21.2733	23.5899	23.3292	24.4578	27.949
1680	Chr10:42480803-42481803	38.7785	-0.261413	0.30364	-0.86093	0.389277	0.999637	19	21	61	35	81	45	30.0567	34.3645	57.5594	45.3623	37.3789	27.949
1681	Chr10:42579677-42580677	11.4407	0.324197	0.610112	0.531373	0.59516	0.999637	3	4	8	11	38	29	4.74579	6.54563	7.54877	14.2567	17.5358	18.0116
1682	Chr10:42893836-42894836	43.4093	-0.0275732	0.28038	-0.0983424	0.92166	0.999637	23	25	53	24	100	90	36.3844	40.9102	50.0106	31.1056	46.1467	55.8981
1683	Chr10:42894011-42895011	45.9983	0.0741225	0.276141	0.268423	0.788374	0.999637	21	29	57	27	103	95	33.2206	47.4558	53.785	34.9938	47.5311	59.0035
1684	Chr10:42940793-42941793	62.1763	-0.449315	0.243924	-1.84203	0.0654715	0.999637	50	31	84	42	127	82	79.0966	50.7286	79.2621	54.4348	58.6064	50.9293
1685	Chr10:43170696-43171696	7.93317	1.65876	0.718317	2.30923	0.0209308	0.999637	2	11	2	7	12	16	3.16386	18.0005	1.88719	9.07246	5.53761	9.93743
1686	Chr10:43175821-43176821	11.6445	-0.183751	0.559076	-0.32867	0.742405	0.999637	8	9	10	5	32	19	12.6555	14.7277	9.43597	6.48033	14.767	11.8007
1687	Chr10:43198447-43199447	42.5386	0.331377	0.270156	1.22662	0.219967	0.999637	17	30	47	38	86	74	26.8928	49.0922	44.349	49.2505	39.6862	45.9606
1688	Chr10:43260300-43261300	29.9299	-0.520267	0.328597	-1.5833	0.113353	0.999637	19	14	44	26	71	30	30.0567	22.9097	41.5183	33.6977	32.7642	18.6327
1689	Chr10:43298476-43299476	45.3738	-0.261219	0.26413	-0.98898	0.322673	0.999637	29	20	58	39	104	65	45.876	32.7281	54.7286	50.5466	47.9926	40.3708
1690	Chr10:43312734-43313734	11.4112	0.197489	0.568012	0.347684	0.728078	0.999637	9	7	6	8	27	23	14.2374	11.4548	5.66158	10.3685	12.4596	14.2851
1691	Chr10:43540538-43541538	6.13517	1.05793	0.864316	1.22401	0.22095	0.999637	0	4	1	7	21	17	0	6.54563	0.943597	9.07246	9.69082	10.5585
1692	Chr10:43621051-43622051	46.2186	-0.0524949	0.286957	-0.182937	0.854848	0.999637	27	30	62	44	83	51	42.7122	49.0922	58.503	57.0269	38.3018	31.6756
1693	Chr10:43621114-43622114	47.3208	-0.0823022	0.281554	-0.292314	0.770047	0.999637	29	31	63	43	85	53	45.876	50.7286	59.4466	55.7308	39.2247	32.9177
1694	Chr10:43724152-43725152	19.6653	-0.143688	0.441385	-0.32554	0.744773	0.999637	19	9	10	12	52	39	30.0567	14.7277	9.43597	15.5528	23.9963	24.2225
1695	Chr10:43987665-43988665	49.7573	-0.0520861	0.266669	-0.195321	0.845142	0.999637	27	26	69	46	95	72	42.7122	42.5466	65.1082	59.619	43.8394	44.7184
1696	Chr10:4423642-4424642	35.647	-0.0923873	0.286528	-0.322437	0.747122	0.999637	19	19	43	28	85	59	30.0567	31.0917	40.5747	36.2898	39.2247	36.6443
1697	Chr10:44247807-44248807	19.3583	0.0806563	0.406334	0.198498	0.842656	0.999637	9	13	19	18	49	27	14.2374	21.2733	17.9283	23.3292	22.6119	16.7694
1698	Chr10:44725417-44726417	6.45017	0.95513	0.773579	1.23469	0.216946	0.999637	3	9	2	3	13	12	4.74579	14.7277	1.88719	3.8882	5.99908	7.45307
1699	Chr10:44786513-44787513	49.225	-0.169305	0.261492	-0.647458	0.517336	0.999637	32	21	59	47	109	70	50.6218	34.3645	55.6722	60.9151	50.3	43.4763
1700	Chr10:44897405-44898405	3.26367	1.699	1.07894	1.57469	0.115327	0.999637	0	1	1	2	7	18	0	1.63641	0.943597	2.59213	3.23027	11.1796
1701	Chr10:45055069-45056069	41.8649	0.158699	0.2677	0.592823	0.5533	0.999637	26	29	44	29	80	75	41.1302	47.4558	41.5183	37.5859	36.9174	46.5817
1702	Chr10:45205701-45206701	35.6823	-0.229625	0.288325	-0.796409	0.425794	0.999637	21	18	48	28	80	53	33.2206	29.4553	45.2926	36.2898	36.9174	32.9177
1703	Chr10:4522132-4523132	41.6188	-0.253097	0.289075	-0.875542	0.381279	0.999637	31	17	59	31	74	69	49.0399	27.8189	55.6722	40.178	34.1486	42.8552
1704	Chr10:45297136-45298136	27.4324	0.210343	0.326423	0.644388	0.519324	0.999637	18	17	28	25	48	44	28.4748	27.8189	26.4207	32.4016	22.1504	27.3279
1705	Chr10:4540442-4541442	47.3209	0.0518476	0.271616	0.190886	0.848615	0.999637	32	29	58	42	76	67	50.6218	47.4558	54.7286	54.4348	35.0715	41.613
1706	Chr10:4706823-4707823	7.76927	1.26044	0.804465	1.5668	0.117161	0.999637	3	14	2	1	14	15	4.74579	22.9097	1.88719	1.29607	6.46054	9.31634
1707	Chr10:4752313-4753313	6.55038	-0.286583	0.740391	-0.387069	0.698705	0.999637	5	5	4	5	20	6	7.90966	8.18203	3.77439	6.48033	9.22935	3.72654
1708	Chr10:4795350-4796350	38.3057	-0.355183	0.281432	-1.26205	0.206929	0.999637	30	19	40	23	98	62	47.4579	31.0917	37.7439	29.8095	45.2238	38.5075
1709	Chr10:49508072-49509072	28.7265	-0.0648794	0.3232	-0.200741	0.840901	0.999637	15	13	38	26	62	47	23.729	21.2733	35.8567	33.6977	28.611	29.1912
1710	Chr10:50311976-50312976	41.9023	-0.287381	0.283312	-1.01436	0.31041	0.999637	31	28	57	26	77	54	49.0399	45.8194	53.785	33.6977	35.533	33.5388
1711	Chr10:50614958-50615958	14.7036	-0.125414	0.479177	-0.261728	0.793531	0.999637	10	6	18	13	30	24	15.8193	9.81844	16.9847	16.8489	13.844	14.9061
1712	Chr10:51199939-51200939	2.93568	0.129027	1.09646	0.117676	0.906324	0.999637	1	1	1	0	13	12	1.58193	1.63641	0.943597	0	5.99908	7.45307
1713	Chr10:51199947-51200947	3.30896	0.154623	0.995152	0.155376	0.876525	0.999637	1	1	2	1	13	12	1.58193	1.63641	1.88719	1.29607	5.99908	7.45307
1714	Chr10:51309786-51310786	12.7712	0.246696	0.52542	0.469522	0.638697	0.999637	5	9	11	11	34	22	7.90966	14.7277	10.3796	14.2567	15.6899	13.664
1715	Chr10:51350764-51351764	5.76674	-0.0978653	0.786803	-0.124383	0.901012	0.999637	3	3	3	3	22	13	4.74579	4.90922	2.83079	3.8882	10.1523	8.07416
1716	Chr10:51397063-51398063	33.2845	-0.251064	0.294428	-0.852716	0.393817	0.999637	20	18	40	23	84	52	31.6386	29.4553	37.7439	29.8095	38.7633	32.2967
1717	Chr10:51476500-51477500	7.54918	1.0364	0.72912	1.42144	0.15519	0.999637	1	7	3	6	20	20	1.58193	11.4548	2.83079	7.7764	9.22935	12.4218
1718	Chr10:51741809-51742809	22.1993	0.306737	0.383797	0.799217	0.424164	0.999637	11	8	20	24	51	47	17.4012	13.0913	18.8719	31.1056	23.5348	29.1912
1719	Chr10:51914550-51915550	8.83512	0.177138	0.637028	0.27807	0.780959	0.999637	6	5	6	5	22	21	9.49159	8.18203	5.66158	6.48033	10.1523	13.0429
1720	Chr10:51952926-51953926	40.134	0.0600185	0.270766	0.221662	0.824577	0.999637	21	25	45	33	89	65	33.2206	40.9102	42.4618	42.7702	41.0706	40.3708
1721	Chr10:52085170-52086170	5.23582	1.28747	0.808333	1.59274	0.111218	0.999637	2	5	4	6	5	10	3.16386	8.18203	3.77439	7.7764	2.30734	6.21089
1722	Chr10:52101381-52102381	52.9913	0.159327	0.261302	0.609742	0.542033	0.999637	26	29	67	54	98	82	41.1302	47.4558	63.221	69.9876	45.2238	50.9293
1723	Chr10:52108279-52109279	11.2719	0.780139	0.616312	1.26582	0.205579	0.999637	2	12	12	4	21	30	3.16386	19.6369	11.3232	5.18426	9.69082	18.6327
1724	Chr10:52136854-52137854	41.4985	-0.124092	0.270759	-0.458313	0.646728	0.999637	33	23	40	30	90	66	52.2037	37.6374	37.7439	38.882	41.5321	40.9919
1725	Chr10:52247827-52248827	3.2798	0.38435	1.01463	0.378808	0.704831	0.999637	3	2	0	1	9	10	4.74579	3.27281	0	1.29607	4.15321	6.21089
1726	Chr10:52265045-52266045	26.0123	0.156662	0.336534	0.465516	0.641562	0.999637	18	14	25	25	49	42	28.4748	22.9097	23.5899	32.4016	22.6119	26.0858
1727	Chr10:52409840-52410840	27.0382	0.208479	0.350042	0.595583	0.551454	0.999637	11	10	28	29	67	54	17.4012	16.3641	26.4207	37.5859	30.9183	33.5388
1728	Chr10:5276848-5277848	10.9615	0.990663	0.584515	1.69485	0.0901043	0.999637	4	11	5	9	22	24	6.32773	18.0005	4.71798	11.6646	10.1523	14.9061
1729	Chr10:53056993-53057993	6.83602	1.03243	0.729333	1.41558	0.156897	0.999637	2	6	3	5	15	19	3.16386	9.81844	2.83079	6.48033	6.92201	11.8007
1730	Chr10:53061311-53062311	4.10671	-0.561135	0.919779	-0.610076	0.541812	0.999637	5	0	4	2	9	10	7.90966	0	3.77439	2.59213	4.15321	6.21089
1731	Chr10:53068436-53069436	8.68011	0.8652	0.681286	1.26995	0.204102	0.999637	3	11	5	3	18	20	4.74579	18.0005	4.71798	3.8882	8.30641	12.4218
1732	Chr10:53194271-53195271	8.01266	0.31092	0.655848	0.474073	0.635448	0.999637	4	6	6	5	20	17	6.32773	9.81844	5.66158	6.48033	9.22935	10.5585
1733	Chr10:53316268-53317268	46.738	0.00319952	0.275643	0.0116075	0.990739	0.999643	23	33	67	35	85	68	36.3844	54.0014	63.221	45.3623	39.2247	42.2341
1734	Chr10:53349745-53350745	16.3142	0.125176	0.459034	0.272694	0.785088	0.999637	7	11	23	15	29	23	11.0735	18.0005	21.7027	19.441	13.3826	14.2851
1735	Chr10:53470215-53471215	33.81	-0.0712248	0.292974	-0.24311	0.80792	0.999637	20	18	38	24	80	61	31.6386	29.4553	35.8567	31.1056	36.9174	37.8865
1736	Chr10:53795102-53796102	37.1232	0.162307	0.293375	0.55324	0.580099	0.999637	25	17	33	41	76	58	39.5483	27.8189	31.1387	53.1387	35.0715	36.0232
1737	Chr10:55826224-55827224	12.3274	0.0758344	0.53836	0.140862	0.887979	0.999637	10	5	12	10	22	25	15.8193	8.18203	11.3232	12.9607	10.1523	15.5272
1738	Chr10:55947995-55948995	37.4172	0.0376671	0.314002	0.119958	0.904517	0.999637	16	16	56	40	70	58	25.3109	26.1825	52.8414	51.8426	32.3027	36.0232
1739	Chr10:56074404-56075404	3.59842	0.0282453	0.931216	0.0303317	0.975803	0.999637	4	3	2	2	6	5	6.32773	4.90922	1.88719	2.59213	2.7688	3.10545
1740	Chr10:56096607-56097607	28.0321	-0.382882	0.70403	-0.543844	0.586549	0.999637	11	6	56	32	54	35	17.4012	9.81844	52.8414	41.4741	24.9192	21.7381
1741	Chr10:56464441-56465441	7.94131	0.64992	0.658659	0.986733	0.323773	0.999637	3	6	6	6	17	19	4.74579	9.81844	5.66158	7.7764	7.84495	11.8007
1742	Chr10:57205692-57206692	31.926	0.0348153	0.309326	0.112552	0.910386	0.999637	23	24	35	21	56	48	36.3844	39.2738	33.0259	27.2174	25.8422	29.8123
1743	Chr10:57251836-57252836	34.207	-0.266367	0.303098	-0.878814	0.379502	0.999637	20	12	46	27	83	60	31.6386	19.6369	43.4054	34.9938	38.3018	37.2654
1744	Chr10:5734448-5735448	7.71503	0.798003	0.687056	1.16148	0.245446	0.999637	5	4	4	6	13	23	7.90966	6.54563	3.77439	7.7764	5.99908	14.2851
1745	Chr10:57351288-57352288	20.1517	-0.253683	0.414553	-0.611944	0.540575	0.999637	11	9	19	12	66	40	17.4012	14.7277	17.9283	15.5528	30.4569	24.8436
1746	Chr10:57504188-57505188	7.1041	0.697665	0.70384	0.991226	0.321575	0.999637	2	7	5	7	16	11	3.16386	11.4548	4.71798	9.07246	7.38348	6.83198
1747	Chr10:57513642-57514642	19.0688	0.0616296	0.41974	0.146828	0.883268	0.999637	12	14	24	9	33	37	18.9832	22.9097	22.6463	11.6646	15.2284	22.9803
1748	Chr10:57687954-57688954	29.6365	0.405259	0.324371	1.24937	0.211531	0.999637	20	24	20	19	58	59	31.6386	39.2738	18.8719	24.6253	26.7651	36.6443
1749	Chr10:57698908-57699908	11.9956	0.891151	0.608368	1.46482	0.14297	0.999637	5	14	5	4	26	31	7.90966	22.9097	4.71798	5.18426	11.9982	19.2538
1750	Chr10:57717746-57718746	45.6575	-0.170009	0.284421	-0.597737	0.550016	0.999637	27	25	64	44	88	52	42.7122	40.9102	60.3902	57.0269	40.6091	32.2967
1751	Chr10:57785715-57786715	36.1901	0.0638042	0.281547	0.226621	0.820719	0.999637	21	24	39	28	77	58	33.2206	39.2738	36.8003	36.2898	35.533	36.0232
1752	Chr10:57909101-57910101	52.2215	-0.423786	0.276275	-1.53393	0.125048	0.999637	33	29	72	46	122	48	52.2037	47.4558	67.939	59.619	56.299	29.8123
1753	Chr10:57960219-57961219	46.2226	-0.285368	0.259884	-1.09806	0.272179	0.999637	32	22	60	33	101	72	50.6218	36.0009	56.6158	42.7702	46.6082	44.7184
1754	Chr10:58137902-58138902	18.2144	-0.130813	0.433788	-0.301558	0.762989	0.999637	12	5	23	15	39	37	18.9832	8.18203	21.7027	19.441	17.9972	22.9803
1755	Chr10:58166244-58167244	6.83168	0.1179	0.724486	0.162735	0.870727	0.999637	3	5	7	2	18	17	4.74579	8.18203	6.60518	2.59213	8.30641	10.5585
1756	Chr10:58180458-58181458	5.73519	1.08637	0.771538	1.40805	0.159115	0.999637	1	5	4	5	11	15	1.58193	8.18203	3.77439	6.48033	5.07614	9.31634
1757	Chr10:58275608-58276608	39.7593	0.0867808	0.293233	0.295945	0.767272	0.999637	17	26	36	36	111	60	26.8928	42.5466	33.9695	46.6584	51.2229	37.2654
1758	Chr10:5863539-5864539	27.6948	0.0202199	0.325595	0.0621012	0.950482	0.999637	18	21	28	20	58	39	28.4748	34.3645	26.4207	25.9213	26.7651	24.2225
1759	Chr10:58684095-58685095	46.5103	0.120844	0.278493	0.433922	0.664345	0.999637	30	25	44	53	95	59	47.4579	40.9102	41.5183	68.6915	43.8394	36.6443
1760	Chr10:58785545-58786545	32.1512	-0.240356	0.305962	-0.785575	0.432117	0.999637	19	13	39	29	81	48	30.0567	21.2733	36.8003	37.5859	37.3789	29.8123
1761	Chr10:58865909-58866909	17.5922	-0.236816	0.438377	-0.54021	0.589052	0.999637	16	9	13	12	44	28	25.3109	14.7277	12.2668	15.5528	20.3046	17.3905
1762	Chr10:58904026-58905026	9.00131	0.134413	0.631361	0.212894	0.83141	0.999637	6	9	8	5	18	12	9.49159	14.7277	7.54877	6.48033	8.30641	7.45307
1763	Chr10:59078312-59079312	51.0112	-0.0901917	0.257717	-0.349965	0.726365	0.999637	39	30	54	44	99	67	61.6953	49.0922	50.9542	57.0269	45.6853	41.613
1764	Chr10:59078940-59079940	48.224	-0.1967	0.276415	-0.711613	0.476705	0.999637	38	26	58	44	87	56	60.1134	42.5466	54.7286	57.0269	40.1477	34.781
1765	Chr10:5913574-5914574	45.7931	-0.18036	0.290404	-0.621066	0.534556	0.999637	29	21	66	46	82	56	45.876	34.3645	62.2774	59.619	37.8403	34.781
1766	Chr10:5913654-5914654	43.7374	-0.142326	0.298765	-0.476381	0.633803	0.999637	28	21	61	46	77	50	44.2941	34.3645	57.5594	59.619	35.533	31.0545
1767	Chr10:59164726-59165726	33.2471	-0.0225774	0.297743	-0.0758285	0.939556	0.999637	18	21	39	29	73	46	28.4748	34.3645	36.8003	37.5859	33.6871	28.5701
1768	Chr10:59341805-59342805	44.7985	-0.155776	0.28206	-0.55228	0.580756	0.999637	27	16	61	44	92	69	42.7122	26.1825	57.5594	57.0269	42.455	42.8552
1769	Chr10:59414018-59415018	54.266	0.00392395	0.256644	0.0152895	0.987801	0.999637	44	33	55	44	94	80	69.605	54.0014	51.8978	57.0269	43.3779	49.6872
1770	Chr10:59465088-59466088	56.255	0.0927389	0.272221	0.340676	0.733348	0.999637	40	29	56	64	103	70	63.2773	47.4558	52.8414	82.9482	47.5311	43.4763
1771	Chr10:59465360-59466360	53.5749	-0.0862137	0.280885	-0.306936	0.758892	0.999637	37	28	66	57	96	59	58.5315	45.8194	62.2774	73.8758	44.3009	36.6443
1772	Chr10:59568468-59569468	33.8479	-0.30409	0.297177	-1.02326	0.306183	0.999637	26	21	41	19	72	50	41.1302	34.3645	38.6875	24.6253	33.2257	31.0545
1773	Chr10:5957934-5958934	45.6333	0.0319352	0.266924	0.119642	0.904767	0.999637	27	27	55	43	87	63	42.7122	44.183	51.8978	55.7308	40.1477	39.1286
1774	Chr10:59681508-59682508	47.5846	-0.148877	0.25734	-0.578522	0.562912	0.999637	33	24	52	42	106	67	52.2037	39.2738	49.067	54.4348	48.9155	41.613
1775	Chr10:59739876-59740876	48.9855	0.0461926	0.267341	0.172785	0.86282	0.999637	35	33	55	42	82	65	55.3676	54.0014	51.8978	54.4348	37.8403	40.3708
1776	Chr10:59809100-59810100	33.9557	0.139734	0.305203	0.45784	0.647067	0.999637	12	24	38	27	85	57	18.9832	39.2738	35.8567	34.9938	39.2247	35.4021
1777	Chr10:59861975-59862975	13.5478	0.568567	0.548562	1.03647	0.299984	0.999637	8	14	7	5	29	31	12.6555	22.9097	6.60518	6.48033	13.3826	19.2538
1778	Chr10:60158738-60159738	10.9321	0.122308	0.597779	0.204604	0.837881	0.999637	5	8	9	4	32	26	7.90966	13.0913	8.49237	5.18426	14.767	16.1483
1779	Chr10:60215042-60216042	40.1539	-0.159671	0.283948	-0.562326	0.573894	0.999637	19	24	58	32	88	56	30.0567	39.2738	54.7286	41.4741	40.6091	34.781
1780	Chr10:60293829-60294829	36.9776	-0.089586	0.3103	-0.288708	0.772805	0.999637	15	17	59	33	75	60	23.729	27.8189	55.6722	42.7702	34.6101	37.2654
1781	Chr10:60400380-60401380	13.5444	0.758668	0.551802	1.37489	0.169165	0.999637	7	14	7	5	27	35	11.0735	22.9097	6.60518	6.48033	12.4596	21.7381
1782	Chr10:60551592-60552592	25.4791	-0.153736	0.34954	-0.439825	0.660064	0.999637	13	19	28	19	67	31	20.5651	31.0917	26.4207	24.6253	30.9183	19.2538
1783	Chr10:60609951-60610951	55.717	-0.315191	0.255146	-1.23534	0.216705	0.999637	43	30	75	40	104	75	68.0231	49.0922	70.7697	51.8426	47.9926	46.5817
1784	Chr10:60634203-60635203	9.4345	0.0756812	0.598962	0.126354	0.899452	0.999637	5	5	10	8	22	17	7.90966	8.18203	9.43597	10.3685	10.1523	10.5585
1785	Chr10:60735686-60736686	48.0852	-0.144008	0.27515	-0.523379	0.60071	0.999637	33	15	52	46	113	82	52.2037	24.5461	49.067	59.619	52.1458	50.9293
1786	Chr10:60760085-60761085	12.5372	-0.173874	0.528701	-0.32887	0.742254	0.999637	8	6	12	8	35	24	12.6555	9.81844	11.3232	10.3685	16.1514	14.9061
1787	Chr10:60772070-60773070	7.91061	1.07776	0.730676	1.47501	0.140209	0.999637	0	7	5	6	20	23	0	11.4548	4.71798	7.7764	9.22935	14.2851
1788	Chr10:6079712-6080712	56.7401	-0.180988	0.269507	-0.671553	0.501868	0.999637	40	25	74	57	105	71	63.2773	40.9102	69.8261	73.8758	48.4541	44.0974
1789	Chr10:60845771-60846771	46.8409	-0.417832	0.263576	-1.58524	0.112911	0.999637	40	22	53	36	105	59	63.2773	36.0009	50.0106	46.6584	48.4541	36.6443
1790	Chr10:60880221-60881221	39.5848	-0.289438	0.293513	-0.986117	0.324076	0.999637	31	25	51	30	72	44	49.0399	40.9102	48.1234	38.882	33.2257	27.3279
1791	Chr10:60914917-60915917	31.3071	-0.17724	0.325741	-0.544113	0.586364	0.999637	26	19	36	27	54	35	41.1302	31.0917	33.9695	34.9938	24.9192	21.7381
1792	Chr10:60938082-60939082	54.4897	-0.186638	0.249284	-0.748697	0.45404	0.999637	38	29	68	45	109	75	60.1134	47.4558	64.1646	58.323	50.3	46.5817
1793	Chr10:60939185-60940185	22.9931	-0.0343918	0.377417	-0.0911241	0.927394	0.999637	19	14	27	18	34	33	30.0567	22.9097	25.4771	23.3292	15.6899	20.496
1794	Chr10:61057733-61058733	23.6392	-0.00784329	0.363279	-0.0215903	0.982775	0.999637	12	19	23	17	61	32	18.9832	31.0917	21.7027	22.0331	28.1495	19.8749
1795	Chr10:61110801-61111801	51.3818	-0.362094	0.251361	-1.44053	0.149718	0.999637	37	23	67	38	115	75	58.5315	37.6374	63.221	49.2505	53.0688	46.5817
1796	Chr10:61142559-61143559	39.9808	-0.0832321	0.2917	-0.285335	0.775388	0.999637	21	18	53	42	85	54	33.2206	29.4553	50.0106	54.4348	39.2247	33.5388
1797	Chr10:61157763-61158763	48.4891	-0.340289	0.271034	-1.25552	0.20929	0.999637	40	20	62	41	93	65	63.2773	32.7281	58.503	53.1387	42.9165	40.3708
1798	Chr10:61177512-61178512	30.4323	-0.41219	0.333179	-1.23714	0.216035	0.999637	17	14	51	26	62	36	26.8928	22.9097	48.1234	33.6977	28.611	22.3592
1799	Chr10:61246395-61247395	51.138	-0.103198	0.253238	-0.407515	0.68363	0.999637	36	24	57	46	107	77	56.9495	39.2738	53.785	59.619	49.377	47.8239
1800	Chr10:61441356-61442356	34.5286	-0.290091	0.295965	-0.980151	0.327012	0.999637	25	18	46	21	71	56	39.5483	29.4553	43.4054	27.2174	32.7642	34.781
1801	Chr10:61595339-61596339	19.0506	-0.158686	0.444387	-0.35709	0.721025	0.999637	4	10	27	16	58	30	6.32773	16.3641	25.4771	20.7371	26.7651	18.6327
1802	Chr10:61606168-61607168	10.2164	0.813338	0.63157	1.2878	0.197814	0.999637	1	6	8	10	26	28	1.58193	9.81844	7.54877	12.9607	11.9982	17.3905
1803	Chr10:61693474-61694474	46.2953	0.0453875	0.270209	0.167972	0.866606	0.999637	27	20	56	47	91	75	42.7122	32.7281	52.8414	60.9151	41.9935	46.5817
1804	Chr10:61714687-61715687	16.0608	0.73462	0.47709	1.53979	0.123611	0.999637	7	11	7	17	38	34	11.0735	18.0005	6.60518	22.0331	17.5358	21.117
1805	Chr10:61842156-61843156	8.93272	0.46394	0.68594	0.676357	0.498814	0.999637	5	7	5	2	22	27	7.90966	11.4548	4.71798	2.59213	10.1523	16.7694
1806	Chr10:61884739-61885739	9.33333	0.443225	0.628361	0.705367	0.480582	0.999637	3	5	11	6	19	26	4.74579	8.18203	10.3796	7.7764	8.76788	16.1483
1807	Chr10:61911986-61912986	70.9361	0.0332417	0.228786	0.145296	0.884477	0.999637	46	41	82	57	134	117	72.7689	67.0927	77.3749	73.8758	61.8366	72.6675
1808	Chr10:61949053-61950053	53.9565	-0.17331	0.266014	-0.651508	0.514719	0.999637	39	29	64	52	106	61	61.6953	47.4558	60.3902	67.3954	48.9155	37.8865
1809	Chr10:61989699-61990699	13.5265	0.108066	0.521936	0.207049	0.835972	0.999637	12	9	8	8	29	26	18.9832	14.7277	7.54877	10.3685	13.3826	16.1483
1810	Chr10:62040705-62041705	42.2428	-0.00767818	0.290016	-0.026475	0.978878	0.999637	26	30	51	39	78	46	41.1302	49.0922	48.1234	50.5466	35.9945	28.5701
1811	Chr10:62064546-62065546	68.2379	-0.0965126	0.247723	-0.389599	0.696833	0.999637	38	37	98	57	128	102	60.1134	60.547	92.4725	73.8758	59.0678	63.3511
1812	Chr10:62113466-62114466	51.6828	-0.158213	0.264335	-0.598534	0.549484	0.999637	31	26	71	48	102	68	49.0399	42.5466	66.9954	62.2112	47.0697	42.2341
1813	Chr10:62188376-62189376	40.8458	-0.196637	0.268747	-0.731682	0.464363	0.999637	27	21	49	31	92	63	42.7122	34.3645	46.2362	40.178	42.455	39.1286
1814	Chr10:62254616-62255616	43.2712	-0.067627	0.284685	-0.237551	0.81223	0.999637	22	24	59	43	88	54	34.8025	39.2738	55.6722	55.7308	40.6091	33.5388
1815	Chr10:62361366-62362366	12.8141	-0.0492228	0.632808	-0.0777846	0.937999	0.999637	9	5	20	19	13	8	14.2374	8.18203	18.8719	24.6253	5.99908	4.96872
1816	Chr10:62382882-62383882	64.366	-0.478977	0.252654	-1.89578	0.0579889	0.999637	46	25	94	54	139	80	72.7689	40.9102	88.6981	69.9876	64.144	49.6872
1817	Chr10:62409275-62410275	50.6815	-0.212742	0.264926	-0.803025	0.42196	0.999637	31	26	68	47	106	62	49.0399	42.5466	64.1646	60.9151	48.9155	38.5075
1818	Chr10:62442472-62443472	45.6849	0.0403483	0.26377	0.152968	0.878424	0.999637	29	25	46	45	98	65	45.876	40.9102	43.4054	58.323	45.2238	40.3708
1819	Chr10:62486465-62487465	53.5236	-0.00768601	0.25585	-0.0300411	0.976034	0.999637	38	27	60	51	99	78	60.1134	44.183	56.6158	66.0994	45.6853	48.445
1820	Chr10:62486564-62487564	54.5214	0.129809	0.252183	0.514741	0.606734	0.999637	35	31	59	54	99	80	55.3676	50.7286	55.6722	69.9876	45.6853	49.6872
1821	Chr10:62523831-62524831	27.2004	-0.176108	0.327326	-0.538021	0.590563	0.999637	18	19	30	17	63	39	28.4748	31.0917	28.3079	22.0331	29.0724	24.2225
1822	Chr10:62562405-62563405	46.0382	0.0708551	0.262947	0.269466	0.787571	0.999637	33	26	39	42	100	71	52.2037	42.5466	36.8003	54.4348	46.1467	44.0974
1823	Chr10:62666200-62667200	20.3304	-0.299422	0.397009	-0.754194	0.450733	0.999637	17	11	26	13	37	30	26.8928	18.0005	24.5335	16.8489	17.0743	18.6327
1824	Chr10:62706160-62707160	58.941	-0.336727	0.247937	-1.35811	0.174427	0.999637	45	34	73	45	123	69	71.1869	55.6378	68.8826	58.323	56.7605	42.8552
1825	Chr10:62706396-62707396	64.3182	-0.0588452	0.241362	-0.243805	0.807382	0.999637	41	37	76	59	129	85	64.8592	60.547	71.7133	76.4679	59.5293	52.7926
1826	Chr10:62843952-62844952	25.022	-0.144935	0.341581	-0.424306	0.671343	0.999637	14	16	28	18	63	37	22.147	26.1825	26.4207	23.3292	29.0724	22.9803
1827	Chr10:62844692-62845692	28.6829	-0.467809	0.351897	-1.32939	0.183718	0.999637	19	9	40	31	68	29	30.0567	14.7277	37.7439	40.178	31.3798	18.0116
1828	Chr10:62883987-62884987	15.3977	-0.279923	0.464499	-0.602635	0.546751	0.999637	12	10	16	9	36	22	18.9832	16.3641	15.0975	11.6646	16.6128	13.664
1829	Chr10:62892347-62893347	32.8041	-0.105963	0.307239	-0.344887	0.73018	0.999637	21	24	41	24	63	41	33.2206	39.2738	38.6875	31.1056	29.0724	25.4647
1830	Chr10:63389682-63390682	5.85662	0.250159	0.804094	0.311107	0.755719	0.999637	5	4	3	1	13	17	7.90966	6.54563	2.83079	1.29607	5.99908	10.5585
1831	Chr10:63552525-63553525	11.1537	-0.0684145	0.555741	-0.123105	0.902024	0.999637	6	6	15	9	23	18	9.49159	9.81844	14.1539	11.6646	10.6138	11.1796
1832	Chr10:6372923-6373923	55.2688	-0.0546819	0.289447	-0.188919	0.850157	0.999637	32	28	73	63	104	59	50.6218	45.8194	68.8826	81.6522	47.9926	36.6443
1833	Chr10:6605677-6606677	29.8511	0.0474922	0.313114	0.151677	0.879441	0.999637	22	16	30	26	57	48	34.8025	26.1825	28.3079	33.6977	26.3036	29.8123
1834	Chr10:66558374-66559374	35.2084	-0.487868	0.299357	-1.62972	0.103161	0.999637	23	15	55	26	77	47	36.3844	24.5461	51.8978	33.6977	35.533	29.1912
1835	Chr10:66558378-66559378	35.7448	-0.480806	0.296432	-1.62197	0.104809	0.999637	24	16	55	26	77	47	37.9664	26.1825	51.8978	33.6977	35.533	29.1912
1836	Chr10:66559105-66560105	48.1283	-0.329867	0.258792	-1.27464	0.202437	0.999637	32	28	66	33	103	64	50.6218	45.8194	62.2774	42.7702	47.5311	39.7497
1837	Chr10:66747553-66748553	31.9822	-0.25103	0.315311	-0.796135	0.425953	0.999637	28	18	31	27	67	37	44.2941	29.4553	29.2515	34.9938	30.9183	22.9803
1838	Chr10:66997724-66998724	21.49	-0.21231	0.400919	-0.529558	0.596419	0.999637	10	9	26	24	59	25	15.8193	14.7277	24.5335	31.1056	27.2266	15.5272
1839	Chr10:67011203-67012203	53.6403	-0.146213	0.24654	-0.59306	0.553141	0.999637	33	32	68	41	113	77	52.2037	52.365	64.1646	53.1387	52.1458	47.8239
1840	Chr10:67034291-67035291	9.4435	0.913679	0.648839	1.40817	0.15908	0.999637	2	11	6	5	21	22	3.16386	18.0005	5.66158	6.48033	9.69082	13.664
1841	Chr10:67374910-67375910	32.8064	-0.0514423	0.301769	-0.170469	0.864641	0.999637	16	16	41	29	77	54	25.3109	26.1825	38.6875	37.5859	35.533	33.5388
1842	Chr10:67441819-67442819	35.4461	0.0617112	0.288854	0.213642	0.830826	0.999637	20	19	42	33	71	56	31.6386	31.0917	39.6311	42.7702	32.7642	34.781
1843	Chr10:67740974-67741974	26.0341	-0.0656391	0.358505	-0.183091	0.854727	0.999637	15	13	36	28	47	31	23.729	21.2733	33.9695	36.2898	21.689	19.2538
1844	Chr10:68004144-68005144	14.7798	0.741861	0.494363	1.50064	0.133449	0.999637	3	10	17	16	25	31	4.74579	16.3641	16.0411	20.7371	11.5367	19.2538
1845	Chr10:6805801-6806801	8.19495	0.133263	0.703458	0.18944	0.849748	0.999637	7	5	3	3	22	21	11.0735	8.18203	2.83079	3.8882	10.1523	13.0429
1846	Chr10:68185995-68186995	25.7025	0.149008	0.343171	0.434208	0.664137	0.999637	11	14	27	21	64	51	17.4012	22.9097	25.4771	27.2174	29.5339	31.6756
1847	Chr10:68613683-68614683	14.7377	0.7793	0.51299	1.51913	0.128729	0.999637	9	18	8	9	23	24	14.2374	29.4553	7.54877	11.6646	10.6138	14.9061
1848	Chr10:68675346-68676346	53.7677	-0.0376735	0.261105	-0.144285	0.885275	0.999637	44	30	55	48	95	74	69.605	49.0922	51.8978	62.2112	43.8394	45.9606
1849	Chr10:68815186-68816186	49.2373	-0.217764	0.27952	-0.779062	0.435943	0.999637	44	25	59	39	79	68	69.605	40.9102	55.6722	50.5466	36.4559	42.2341
1850	Chr10:68996471-68997471	12.3201	-0.108604	0.547783	-0.198261	0.842841	0.999637	9	6	9	7	35	26	14.2374	9.81844	8.49237	9.07246	16.1514	16.1483
1851	Chr10:69559370-69560370	47.6234	-0.305007	0.258815	-1.17848	0.238607	0.999637	34	22	61	38	103	67	53.7857	36.0009	57.5594	49.2505	47.5311	41.613
1852	Chr10:69666933-69667933	10.7995	0.0739756	0.592124	0.124933	0.900577	0.999637	10	7	7	5	22	23	15.8193	11.4548	6.60518	6.48033	10.1523	14.2851
1853	Chr10:69707349-69708349	36.6062	-0.41778	0.292873	-1.42649	0.153727	0.999637	26	15	49	32	83	45	41.1302	24.5461	46.2362	41.4741	38.3018	27.949
1854	Chr10:6979891-6980891	24.5444	0.133244	0.369529	0.36058	0.718414	0.999637	10	10	23	24	69	49	15.8193	16.3641	21.7027	31.1056	31.8413	30.4334
1855	Chr10:69902917-69903917	42.7335	-0.296859	0.283084	-1.04866	0.294334	0.999637	19	20	63	35	109	62	30.0567	32.7281	59.4466	45.3623	50.3	38.5075
1856	Chr10:70118213-70119213	6.91692	0.691909	0.706766	0.978979	0.32759	0.999637	2	6	5	5	16	16	3.16386	9.81844	4.71798	6.48033	7.38348	9.93743
1857	Chr10:70330918-70331918	8.94856	0.15952	0.695591	0.22933	0.818612	0.999637	4	7	8	1	25	25	6.32773	11.4548	7.54877	1.29607	11.5367	15.5272
1858	Chr10:70621948-70622948	43.9066	0.0914617	0.264751	0.345463	0.729747	0.999637	28	31	46	36	85	63	44.2941	50.7286	43.4054	46.6584	39.2247	39.1286
1859	Chr10:70700528-70701528	36.6377	-0.0460938	0.286894	-0.160665	0.872357	0.999637	17	24	44	28	89	56	26.8928	39.2738	41.5183	36.2898	41.0706	34.781
1860	Chr10:70747510-70748510	49.6687	-0.100639	0.265956	-0.378406	0.705129	0.999637	31	26	66	46	93	67	49.0399	42.5466	62.2774	59.619	42.9165	41.613
1861	Chr10:7078292-7079292	8.04481	1.47018	0.79535	1.84847	0.0645345	0.999637	1	7	1	4	20	32	1.58193	11.4548	0.943597	5.18426	9.22935	19.8749
1862	Chr10:70807202-70808202	46.8522	0.0979843	0.26311	0.372408	0.709589	0.999637	27	25	51	48	96	69	42.7122	40.9102	48.1234	62.2112	44.3009	42.8552
1863	Chr10:70810012-70811012	49.225	-0.573366	0.26932	-2.12894	0.0332594	0.999637	49	20	49	31	121	69	77.5147	32.7281	46.2362	40.178	55.8376	42.8552
1864	Chr10:72117094-72118094	38.0391	-0.261631	0.279842	-0.934927	0.349826	0.999637	27	18	48	28	82	59	42.7122	29.4553	45.2926	36.2898	37.8403	36.6443
1865	Chr10:7226202-7227202	9.66249	1.61513	0.679987	2.37524	0.0175377	0.999637	2	14	2	8	17	19	3.16386	22.9097	1.88719	10.3685	7.84495	11.8007
1866	Chr10:72561591-72562591	31.1479	-0.108334	0.309295	-0.350259	0.726144	0.999637	18	15	36	30	73	44	28.4748	24.5461	33.9695	38.882	33.6871	27.3279
1867	Chr10:7309099-7310099	53.7838	0.0686706	0.260809	0.263299	0.792321	0.999637	33	32	63	54	98	70	52.2037	52.365	59.4466	69.9876	45.2238	43.4763
1868	Chr10:7386802-7387802	50.3538	-0.0647707	0.289997	-0.22335	0.823263	0.999637	32	34	64	49	90	49	50.6218	55.6378	60.3902	63.5072	41.5321	30.4334
1869	Chr10:7400434-7401434	49.4137	-0.130422	0.262524	-0.496801	0.61933	0.999637	39	32	52	39	96	62	61.6953	52.365	49.067	50.5466	44.3009	38.5075
1870	Chr10:7400508-7401508	52.1071	-0.25676	0.259027	-0.99125	0.321563	0.999637	43	33	57	38	105	63	68.0231	54.0014	53.785	49.2505	48.4541	39.1286
1871	Chr10:74429423-74430423	35.5303	0.0540502	0.289792	0.186513	0.852042	0.999637	16	23	44	27	79	60	25.3109	37.6374	41.5183	34.9938	36.4559	37.2654
1872	Chr10:7445299-7446299	41.2022	-0.214262	0.279473	-0.766664	0.443281	0.999637	26	28	57	26	81	57	41.1302	45.8194	53.785	33.6977	37.3789	35.4021
1873	Chr10:74494831-74495831	6.56253	1.38886	0.791397	1.75495	0.0792678	0.999637	0	5	3	6	15	22	0	8.18203	2.83079	7.7764	6.92201	13.664
1874	Chr10:74499304-74500304	17.4434	0.524511	0.431062	1.21679	0.223685	0.999637	7	12	14	18	38	32	11.0735	19.6369	13.2104	23.3292	17.5358	19.8749
1875	Chr10:74523142-74524142	45.9323	-0.339506	0.263974	-1.28613	0.198397	0.999637	37	28	54	30	97	59	58.5315	45.8194	50.9542	38.882	44.7623	36.6443
1876	Chr10:74674319-74675319	46.204	-0.0397611	0.257777	-0.154246	0.877416	0.999637	31	28	51	38	94	67	49.0399	45.8194	48.1234	49.2505	43.3779	41.613
1877	Chr10:74779189-74780189	29.924	0.0185129	0.321829	0.057524	0.954128	0.999637	16	14	30	22	78	62	25.3109	22.9097	28.3079	28.5135	35.9945	38.5075
1878	Chr10:74869157-74870157	22.2744	-0.13245	0.377716	-0.350659	0.725844	0.999637	14	7	27	22	50	37	22.147	11.4548	25.4771	28.5135	23.0734	22.9803
1879	Chr10:74980217-74981217	64.4588	-0.0752025	0.267916	-0.280694	0.778945	0.999637	44	37	75	67	123	68	69.605	60.547	70.7697	86.8364	56.7605	42.2341
1880	Chr10:74980288-74981288	69.3344	-0.0483542	0.26304	-0.183828	0.854148	0.999637	47	41	81	71	129	75	74.3508	67.0927	76.4313	92.0207	59.5293	46.5817
1881	Chr10:75022575-75023575	34.9664	0.0711998	0.287045	0.248044	0.8041	0.999637	22	22	36	30	72	53	34.8025	36.0009	33.9695	38.882	33.2257	32.9177
1882	Chr10:75023850-75024850	9.76007	0.485177	0.602092	0.805818	0.420348	0.999637	4	8	8	6	22	22	6.32773	13.0913	7.54877	7.7764	10.1523	13.664
1883	Chr10:75032778-75033778	12.6162	0.954098	0.585905	1.62842	0.103437	0.999637	4	14	4	8	31	29	6.32773	22.9097	3.77439	10.3685	14.3055	18.0116
1884	Chr10:75051627-75052627	13.3973	0.100361	0.555581	0.180642	0.856648	0.999637	9	13	8	4	36	25	14.2374	21.2733	7.54877	5.18426	16.6128	15.5272
1885	Chr10:75106253-75107253	21.2648	0.157847	0.402545	0.392123	0.694967	0.999637	10	11	29	25	36	28	15.8193	18.0005	27.3643	32.4016	16.6128	17.3905
1886	Chr10:7512098-7513098	73.1719	-0.204586	0.237314	-0.862087	0.38864	0.999637	48	39	99	60	143	100	75.9327	63.8199	93.4161	77.764	65.9898	62.1089
1887	Chr10:7512120-7513120	73.5747	-0.200595	0.238116	-0.842426	0.39955	0.999637	49	39	99	61	142	100	77.5147	63.8199	93.4161	79.06	65.5284	62.1089
1888	Chr10:7512190-7513190	74.4459	-0.176445	0.240512	-0.733624	0.463178	0.999637	52	38	94	67	144	97	82.2604	62.1835	88.6981	86.8364	66.4513	60.2457
1889	Chr10:75226602-75227602	52.7509	-0.0711807	0.251755	-0.282738	0.777378	0.999637	39	27	52	48	113	76	61.6953	44.183	49.067	62.2112	52.1458	47.2028
1890	Chr10:75235659-75236659	37.2868	-0.194536	0.286832	-0.678222	0.497631	0.999637	24	19	46	34	81	48	37.9664	31.0917	43.4054	44.0662	37.3789	29.8123
1891	Chr10:75243199-75244199	43.4252	-0.00471441	0.283514	-0.0166285	0.986733	0.999637	23	23	60	43	80	60	36.3844	37.6374	56.6158	55.7308	36.9174	37.2654
1892	Chr10:75243659-75244659	31.6406	-0.0320742	0.314797	-0.101889	0.918845	0.999637	18	17	43	30	58	44	28.4748	27.8189	40.5747	38.882	26.7651	27.3279
1893	Chr10:75260829-75261829	30.1571	-0.209101	0.334301	-0.625487	0.531652	0.999637	23	9	33	33	66	41	36.3844	14.7277	31.1387	42.7702	30.4569	25.4647
1894	Chr10:75284788-75285788	12.3419	0.313342	0.563093	0.556466	0.577892	0.999637	5	10	10	5	33	30	7.90966	16.3641	9.43597	6.48033	15.2284	18.6327
1895	Chr10:75297126-75298126	35.3266	-0.404256	0.31074	-1.30095	0.193276	0.999637	27	17	48	32	70	36	42.7122	27.8189	45.2926	41.4741	32.3027	22.3592
1896	Chr10:75322495-75323495	39.0531	0.153766	0.292614	0.525491	0.599242	0.999637	24	24	46	40	64	52	37.9664	39.2738	43.4054	51.8426	29.5339	32.2967
1897	Chr10:75355644-75356644	24.4962	-0.124292	0.344929	-0.360341	0.718592	0.999637	14	13	27	19	62	40	22.147	21.2733	25.4771	24.6253	28.611	24.8436
1898	Chr10:75383862-75384862	53.7432	-0.102858	0.247117	-0.416233	0.67724	0.999637	35	25	61	47	119	85	55.3676	40.9102	57.5594	60.9151	54.9146	52.7926
1899	Chr10:75397819-75398819	30.379	0.0640747	0.333131	0.192341	0.847475	0.999637	17	11	35	37	63	44	26.8928	18.0005	33.0259	47.9544	29.0724	27.3279
1900	Chr10:75400178-75401178	36.2384	0.0337968	0.324235	0.104235	0.916982	0.999637	24	30	42	32	61	34	37.9664	49.0922	39.6311	41.4741	28.1495	21.117
1901	Chr10:75402917-75403917	24.3562	0.163459	0.357067	0.457781	0.64711	0.999637	16	13	29	23	38	40	25.3109	21.2733	27.3643	29.8095	17.5358	24.8436
1902	Chr10:75405303-75406303	9.8163	1.10724	0.630512	1.75609	0.0790731	0.999637	4	7	3	9	20	28	6.32773	11.4548	2.83079	11.6646	9.22935	17.3905
1903	Chr10:75416760-75417760	32.3516	-0.136032	0.308697	-0.440666	0.659455	0.999637	18	16	40	32	74	42	28.4748	26.1825	37.7439	41.4741	34.1486	26.0858
1904	Chr10:75494858-75495858	50.7279	-0.203627	0.25928	-0.785354	0.432246	0.999637	37	23	59	47	107	68	58.5315	37.6374	55.6722	60.9151	49.377	42.2341
1905	Chr10:7551769-7552769	19.3331	0.0717453	0.432916	0.165726	0.868373	0.999637	7	14	18	10	59	40	11.0735	22.9097	16.9847	12.9607	27.2266	24.8436
1906	Chr10:75573206-75574206	11.9569	0.758429	0.564551	1.34342	0.179136	0.999637	6	11	7	6	23	31	9.49159	18.0005	6.60518	7.7764	10.6138	19.2538
1907	Chr10:75609697-75610697	10.5777	0.556724	0.620508	0.897206	0.369609	0.999637	3	11	8	4	27	25	4.74579	18.0005	7.54877	5.18426	12.4596	15.5272
1908	Chr10:75700110-75701110	43.3742	-0.0908466	0.27935	-0.325207	0.745024	0.999637	34	22	52	37	73	64	53.7857	36.0009	49.067	47.9544	33.6871	39.7497
1909	Chr10:75716099-75717099	11.228	0.543537	0.601302	0.903934	0.366031	0.999637	6	4	7	8	26	36	9.49159	6.54563	6.60518	10.3685	11.9982	22.3592
1910	Chr10:75807536-75808536	47.4688	-0.245475	0.268716	-0.913509	0.360975	0.999637	29	33	62	35	103	54	45.876	54.0014	58.503	45.3623	47.5311	33.5388
1911	Chr10:75905157-75906157	54.7485	-0.0238735	0.259325	-0.0920604	0.92665	0.999637	31	35	68	51	109	67	49.0399	57.2742	64.1646	66.0994	50.3	41.613
1912	Chr10:75911327-75912327	9.98443	0.326757	0.686018	0.476309	0.633854	0.999637	5	9	6	1	28	28	7.90966	14.7277	5.66158	1.29607	12.9211	17.3905
1913	Chr10:75931173-75932173	64.9733	-0.269057	0.2415	-1.11411	0.265233	0.999637	46	35	84	53	132	82	72.7689	57.2742	79.2621	68.6915	60.9137	50.9293
1914	Chr10:75931359-75932359	60.2518	-0.311366	0.247437	-1.25836	0.208261	0.999637	46	32	75	49	123	73	72.7689	52.365	70.7697	63.5072	56.7605	45.3395
1915	Chr10:75993834-75994834	47.5252	-0.177262	0.269771	-0.657084	0.511127	0.999637	26	22	65	45	104	65	41.1302	36.0009	61.3338	58.323	47.9926	40.3708
1916	Chr10:76024518-76025518	11.9923	0.811297	0.614422	1.32042	0.186694	0.999637	8	11	6	3	19	37	12.6555	18.0005	5.66158	3.8882	8.76788	22.9803
1917	Chr10:76037894-76038894	11.0724	0.465058	0.636292	0.730887	0.464848	0.999637	5	12	7	2	28	27	7.90966	19.6369	6.60518	2.59213	12.9211	16.7694
1918	Chr10:76085875-76086875	16.8037	0.436307	0.458275	0.952065	0.341064	0.999637	5	9	17	21	38	28	7.90966	14.7277	16.0411	27.2174	17.5358	17.3905
1919	Chr10:76188413-76189413	7.03293	-0.20671	0.7676	-0.269294	0.787704	0.999637	2	3	4	4	33	16	3.16386	4.90922	3.77439	5.18426	15.2284	9.93743
1920	Chr10:76424132-76425132	25.73	0.40443	0.36374	1.11187	0.266195	0.999637	8	14	29	33	53	39	12.6555	22.9097	27.3643	42.7702	24.4578	24.2225
1921	Chr10:76474241-76475241	11.2753	0.466788	0.612425	0.762196	0.445943	0.999637	3	5	8	8	34	34	4.74579	8.18203	7.54877	10.3685	15.6899	21.117
1922	Chr10:76494487-76495487	28.0934	-0.030225	0.322601	-0.0936918	0.925354	0.999637	16	13	31	26	66	46	25.3109	21.2733	29.2515	33.6977	30.4569	28.5701
1923	Chr10:76628793-76629793	35.3866	-0.217155	0.322015	-0.674364	0.50008	0.999637	14	14	51	37	91	47	22.147	22.9097	48.1234	47.9544	41.9935	29.1912
1924	Chr10:76721468-76722468	42.365	-0.224056	0.29209	-0.76708	0.443034	0.999637	26	21	57	43	88	46	41.1302	34.3645	53.785	55.7308	40.6091	28.5701
1925	Chr10:76721546-76722546	40.9812	-0.173574	0.293182	-0.592035	0.553827	0.999637	23	20	56	42	86	48	36.3844	32.7281	52.8414	54.4348	39.6862	29.8123
1926	Chr10:7675528-7676528	37.9381	-0.48419	0.286908	-1.68761	0.091486	0.999637	28	22	54	23	81	47	44.2941	36.0009	50.9542	29.8095	37.3789	29.1912
1927	Chr10:76880515-76881515	46.8642	0.0894986	0.256504	0.348917	0.727151	0.999637	26	33	50	38	100	70	41.1302	54.0014	47.1798	49.2505	46.1467	43.4763
1928	Chr10:76978058-76979058	57.4373	-0.0553926	0.269425	-0.205596	0.837107	0.999637	31	30	79	59	110	72	49.0399	49.0922	74.5441	76.4679	50.7614	44.7184
1929	Chr10:76992498-76993498	13.1412	0.332574	0.555053	0.599176	0.549056	0.999637	2	10	13	9	39	28	3.16386	16.3641	12.2668	11.6646	17.9972	17.3905
1930	Chr10:77043966-77044966	52.9962	-0.135784	0.245931	-0.552123	0.580864	0.999637	35	30	65	38	110	84	55.3676	49.0922	61.3338	49.2505	50.7614	52.1715
1931	Chr10:77068343-77069343	28.0688	-0.00255913	0.318149	-0.0080438	0.993582	0.999754	17	18	29	21	64	45	26.8928	29.4553	27.3643	27.2174	29.5339	27.949
1932	Chr10:77084521-77085521	42.0468	-0.0215645	0.266773	-0.0808347	0.935573	0.999637	23	24	48	36	96	65	36.3844	39.2738	45.2926	46.6584	44.3009	40.3708
1933	Chr10:77168890-77169890	10.4015	1.05592	0.617276	1.71061	0.087153	0.999637	3	11	4	8	23	24	4.74579	18.0005	3.77439	10.3685	10.6138	14.9061
1934	Chr10:77173703-77174703	8.62251	0.227038	0.671246	0.338234	0.735187	0.999637	3	7	7	3	26	21	4.74579	11.4548	6.60518	3.8882	11.9982	13.0429
1935	Chr10:77178071-77179071	13.6305	0.464249	0.524473	0.885172	0.376064	0.999637	7	15	12	6	25	25	11.0735	24.5461	11.3232	7.7764	11.5367	15.5272
1936	Chr10:77182832-77183832	8.81351	-0.00867048	0.62225	-0.0139341	0.988883	0.999637	4	6	10	7	22	13	6.32773	9.81844	9.43597	9.07246	10.1523	8.07416
1937	Chr10:77188750-77189750	7.35766	0.751968	0.714305	1.05273	0.292466	0.999637	2	7	4	4	19	19	3.16386	11.4548	3.77439	5.18426	8.76788	11.8007
1938	Chr10:77221927-77222927	4.28153	-0.00740591	0.898139	-0.00824584	0.993421	0.999754	1	4	3	1	17	9	1.58193	6.54563	2.83079	1.29607	7.84495	5.58981
1939	Chr10:77239189-77240189	2.69087	0.829443	1.05085	0.789306	0.429933	0.999637	2	2	0	2	6	7	3.16386	3.27281	0	2.59213	2.7688	4.34763
1940	Chr10:77274088-77275088	10.4161	0.730565	0.632467	1.1551	0.248048	0.999637	2	10	6	6	29	26	3.16386	16.3641	5.66158	7.7764	13.3826	16.1483
1941	Chr10:77291713-77292713	10.7641	0.0345636	0.634168	0.0545022	0.956535	0.999637	9	9	6	2	27	24	14.2374	14.7277	5.66158	2.59213	12.4596	14.9061
1942	Chr10:77315108-77316108	12.6823	0.900822	0.581904	1.54806	0.121608	0.999637	6	14	5	5	26	33	9.49159	22.9097	4.71798	6.48033	11.9982	20.496
1943	Chr10:77364781-77365781	37.6121	-0.394539	0.312898	-1.26092	0.207338	0.999637	17	12	60	34	96	55	26.8928	19.6369	56.6158	44.0662	44.3009	34.1599
1944	Chr10:77432808-77433808	12.1999	0.624301	0.561922	1.11101	0.266564	0.999637	4	12	8	7	30	27	6.32773	19.6369	7.54877	9.07246	13.844	16.7694
1945	Chr10:77440770-77441770	39.7492	-0.222943	0.301044	-0.740567	0.458956	0.999637	20	13	59	38	90	63	31.6386	21.2733	55.6722	49.2505	41.5321	39.1286
1946	Chr10:77472328-77473328	33.6597	-0.21281	0.311628	-0.682898	0.494671	0.999637	21	13	49	31	65	50	33.2206	21.2733	46.2362	40.178	29.9954	31.0545
1947	Chr10:77504193-77505193	8.62944	0.187856	0.644135	0.291641	0.770561	0.999637	8	5	7	6	13	17	12.6555	8.18203	6.60518	7.7764	5.99908	10.5585
1948	Chr10:77505855-77506855	24.1606	0.339831	0.362852	0.936556	0.348987	0.999637	8	13	28	27	51	42	12.6555	21.2733	26.4207	34.9938	23.5348	26.0858
1949	Chr10:77531606-77532606	43.9446	-0.0568094	0.271369	-0.209344	0.83418	0.999637	27	22	56	41	85	64	42.7122	36.0009	52.8414	53.1387	39.2247	39.7497
1950	Chr10:77632013-77633013	37.6329	-0.382986	0.287712	-1.33114	0.183141	0.999637	27	17	53	29	78	51	42.7122	27.8189	50.0106	37.5859	35.9945	31.6756
1951	Chr10:77647394-77648394	48.9229	-0.168441	0.272909	-0.617205	0.5371	0.999637	33	30	65	42	89	57	52.2037	49.0922	61.3338	54.4348	41.0706	35.4021
1952	Chr10:77706887-77707887	46.0496	-0.243661	0.265203	-0.918769	0.358216	0.999637	34	20	57	39	95	67	53.7857	32.7281	53.785	50.5466	43.8394	41.613
1953	Chr10:77814734-77815734	35.1523	0.089802	0.314625	0.285425	0.775318	0.999637	18	31	33	29	84	39	28.4748	50.7286	31.1387	37.5859	38.7633	24.2225
1954	Chr10:77855560-77856560	2.39154	0.373185	1.08859	0.342815	0.731738	0.999637	2	1	0	2	7	6	3.16386	1.63641	0	2.59213	3.23027	3.72654
1955	Chr10:77875288-77876288	41.6254	-0.19417	0.272794	-0.711783	0.476599	0.999637	26	21	52	37	92	56	41.1302	34.3645	49.067	47.9544	42.455	34.781
1956	Chr10:77887916-77888916	50.153	-0.319895	0.271455	-1.17845	0.238618	0.999637	42	30	64	36	89	60	66.4411	49.0922	60.3902	46.6584	41.0706	37.2654
1957	Chr10:77927220-77928220	37.7026	-0.108549	0.279006	-0.389056	0.697234	0.999637	21	21	44	31	90	57	33.2206	34.3645	41.5183	40.178	41.5321	35.4021
1958	Chr10:77950087-77951087	14.4062	-0.0556282	0.49095	-0.113307	0.909787	0.999637	8	12	16	7	34	23	12.6555	19.6369	15.0975	9.07246	15.6899	14.2851
1959	Chr10:77981853-77982853	10.4432	1.12661	0.666536	1.69024	0.0909815	0.999637	4	15	6	2	16	26	6.32773	24.5461	5.66158	2.59213	7.38348	16.1483
1960	Chr10:78036746-78037746	39.9334	-0.211035	0.285391	-0.739461	0.459627	0.999637	20	21	57	35	90	53	31.6386	34.3645	53.785	45.3623	41.5321	32.9177
1961	Chr10:78054209-78055209	30.4149	0.233314	0.308586	0.756075	0.449604	0.999637	15	20	34	28	59	49	23.729	32.7281	32.0823	36.2898	27.2266	30.4334
1962	Chr10:78080319-78081319	9.01732	1.01527	0.670813	1.5135	0.130153	0.999637	5	7	2	6	18	27	7.90966	11.4548	1.88719	7.7764	8.30641	16.7694
1963	Chr10:78180538-78181538	14.3754	0.248868	0.503835	0.493947	0.621343	0.999637	11	13	10	7	28	26	17.4012	21.2733	9.43597	9.07246	12.9211	16.1483
1964	Chr10:78215312-78216312	23.0692	-0.156349	0.365707	-0.427527	0.668996	0.999637	13	10	28	23	55	32	20.5651	16.3641	26.4207	29.8095	25.3807	19.8749
1965	Chr10:78242742-78243742	30.951	0.0163664	0.304885	0.0536806	0.95719	0.999637	19	16	32	24	71	57	30.0567	26.1825	30.1951	31.1056	32.7642	35.4021
1966	Chr10:78310158-78311158	6.70513	0.358831	0.733646	0.489106	0.624766	0.999637	3	4	3	5	21	16	4.74579	6.54563	2.83079	6.48033	9.69082	9.93743
1967	Chr10:78337795-78338795	4.6632	0.435043	0.853243	0.50987	0.610143	0.999637	2	1	6	3	8	16	3.16386	1.63641	5.66158	3.8882	3.69174	9.93743
1968	Chr10:78379088-78380088	2.88383	-0.0155209	1.00536	-0.0154381	0.987683	0.999637	3	1	2	1	6	8	4.74579	1.63641	1.88719	1.29607	2.7688	4.96872
1969	Chr10:78417453-78418453	1.97463	1.30576	1.16155	1.12415	0.260948	0.999637	0	1	2	2	3	7	0	1.63641	1.88719	2.59213	1.3844	4.34763
1970	Chr10:78425555-78426555	4.74437	1.15783	0.862797	1.34195	0.179611	0.999637	0	6	4	3	9	11	0	9.81844	3.77439	3.8882	4.15321	6.83198
1971	Chr10:78443296-78444296	9.28141	0.912419	0.649289	1.40526	0.159945	0.999637	3	8	4	6	22	26	4.74579	13.0913	3.77439	7.7764	10.1523	16.1483
1972	Chr10:78479570-78480570	9.62671	0.272919	0.638051	0.427738	0.668842	0.999637	4	8	8	3	26	24	6.32773	13.0913	7.54877	3.8882	11.9982	14.9061
1973	Chr10:78496969-78497969	7.57681	1.59154	0.735155	2.1649	0.0303954	0.999637	5	7	2	6	6	22	7.90966	11.4548	1.88719	7.7764	2.7688	13.664
1974	Chr10:78559845-78560845	37.0556	0.162904	0.289871	0.561987	0.574125	0.999637	23	27	43	30	61	55	36.3844	44.183	40.5747	38.882	28.1495	34.1599
1975	Chr10:78611043-78612043	3.83343	0.73798	0.917854	0.804027	0.421381	0.999637	3	1	2	3	6	13	4.74579	1.63641	1.88719	3.8882	2.7688	8.07416
1976	Chr10:78710023-78711023	5.25646	0.755392	0.838748	0.900619	0.367791	0.999637	3	7	1	3	12	8	4.74579	11.4548	0.943597	3.8882	5.53761	4.96872
1977	Chr10:78818822-78819822	4.00701	1.13568	0.940359	1.20771	0.227157	0.999637	2	6	1	1	7	9	3.16386	9.81844	0.943597	1.29607	3.23027	5.58981
1978	Chr10:78931189-78932189	7.04109	-0.109165	0.767617	-0.142212	0.886912	0.999637	5	6	3	1	24	15	7.90966	9.81844	2.83079	1.29607	11.0752	9.31634
1979	Chr10:78996032-78997032	41.6747	-0.308844	0.269359	-1.14659	0.251551	0.999637	33	20	47	30	94	62	52.2037	32.7281	44.349	38.882	43.3779	38.5075
1980	Chr10:79004205-79005205	10.402	0.219387	0.604939	0.362661	0.716858	0.999637	6	9	5	7	30	17	9.49159	14.7277	4.71798	9.07246	13.844	10.5585
1981	Chr10:79017444-79018444	41.9022	-0.302633	0.279732	-1.08187	0.27931	0.999637	27	29	59	24	86	56	42.7122	47.4558	55.6722	31.1056	39.6862	34.781
1982	Chr10:79049576-79050576	10.3302	0.288966	0.650813	0.444008	0.657037	0.999637	4	10	4	5	36	20	6.32773	16.3641	3.77439	6.48033	16.6128	12.4218
1983	Chr10:79076263-79077263	30.8419	0.0647122	0.309665	0.208975	0.834468	0.999637	14	21	36	26	70	46	22.147	34.3645	33.9695	33.6977	32.3027	28.5701
1984	Chr10:79100163-79101163	50.0845	-0.0977446	0.274785	-0.355713	0.722056	0.999637	41	17	49	45	104	89	64.8592	27.8189	46.2362	58.323	47.9926	55.277
1985	Chr10:79107983-79108983	13.837	0.851721	0.541694	1.57233	0.115874	0.999637	7	15	4	11	30	25	11.0735	24.5461	3.77439	14.2567	13.844	15.5272
1986	Chr10:79126820-79127820	18.91	-0.210927	0.411029	-0.513167	0.607834	0.999637	15	11	21	10	40	33	23.729	18.0005	19.8155	12.9607	18.4587	20.496
1987	Chr10:79131656-79132656	53.7044	-0.0781254	0.256697	-0.304349	0.760862	0.999637	44	33	56	42	97	75	69.605	54.0014	52.8414	54.4348	44.7623	46.5817
1988	Chr10:79144441-79145441	24.0674	-0.0367188	0.368807	-0.0995612	0.920693	0.999637	15	21	30	11	45	37	23.729	34.3645	28.3079	14.2567	20.766	22.9803
1989	Chr10:79151266-79152266	13.818	0.220733	0.50471	0.437347	0.66186	0.999637	6	7	12	12	37	29	9.49159	11.4548	11.3232	15.5528	17.0743	18.0116
1990	Chr10:79166604-79167604	41.3821	-0.0914027	0.27483	-0.33258	0.739452	0.999637	24	20	47	40	97	59	37.9664	32.7281	44.349	51.8426	44.7623	36.6443
1991	Chr10:79178880-79179880	29.5516	-0.277718	0.318363	-0.872331	0.383028	0.999637	15	18	38	22	77	39	23.729	29.4553	35.8567	28.5135	35.533	24.2225
1992	Chr10:79208826-79209826	31.7402	-0.166968	0.326957	-0.510672	0.60958	0.999637	20	12	45	33	59	43	31.6386	19.6369	42.4618	42.7702	27.2266	26.7068
1993	Chr10:79217322-79218322	19.01	-0.301873	0.427337	-0.706405	0.479937	0.999637	13	4	23	16	48	36	20.5651	6.54563	21.7027	20.7371	22.1504	22.3592
1994	Chr10:79229166-79230166	46.7353	-0.0152998	0.260179	-0.0588051	0.953107	0.999637	30	25	46	44	107	68	47.4579	40.9102	43.4054	57.0269	49.377	42.2341
1995	Chr10:79239518-79240518	18.5236	-0.242844	0.425019	-0.571372	0.567747	0.999637	12	6	24	19	41	26	18.9832	9.81844	22.6463	24.6253	18.9202	16.1483
1996	Chr10:79253206-79254206	5.56009	0.884739	0.902121	0.980731	0.326725	0.999637	1	2	1	3	19	24	1.58193	3.27281	0.943597	3.8882	8.76788	14.9061
1997	Chr10:79255818-79256818	32.7118	0.295067	0.307565	0.959365	0.337375	0.999637	20	17	36	34	52	56	31.6386	27.8189	33.9695	44.0662	23.9963	34.781
[truncated: 19,636 more rows]
